# Supplementary material for: LAPTM5 Plays a Key Role in the Diagnosis and Prognosis of Testicular Germ Cell Tumors
Source: Hindawi journal article supplement (doi:10.1155/2021/8816456), 2021-01-13
Supplement: f1 [file 8816456.f1.pdf]

Table S1

## GSE3218 UP-DEGs

|          | logFC    | AveExpr  | t        | P. Value | adj. P. ValB |          |
|----------|----------|----------|----------|----------|--------------|----------|
| PTPN6    | 2.899634 | 8.841773 | 10.47077 | 3.95E-18 | 3.36E-17     | 30.33059 |
| GSTO1    | 2.069213 | 10.22676 | 8.481514 | 1.28E-13 | 6.78E-13     | 19.99726 |
| TNFRSF1B | 2.191372 | 7.875343 | 7.222055 | 7.57E-11 | 2.99E-10     | 13.66913 |
| LYZ      | 4.40737  | 9.575078 | 6.851431 | 4.68E-10 | 1.70E-09     | 11.86936 |
| GIMAP4   | 2.575582 | 7.936951 | 6.718353 | 8.94E-10 | 3.14E-09     | 11.23207 |
| DSP      | 3.127381 | 9.840683 | 5.875985 | 4.73E-08 | 1.38E-07     | 7.328812 |
| ID3      | 2.40759  | 8.385845 | 5.611722 | 1.56E-07 | 4.29E-07     | 6.158184 |
| CLEC2B   | 2.28262  | 7.201044 | 5.214743 | 8.94E-07 | 2.25E-06     | 4.456451 |
| CXCR4    | 2.505302 | 9.401293 | 5.203745 | 9.37E-07 | 2.35E-06     | 4.41034  |
| EFEMP1   | 2.791673 | 8.056005 | 5.146078 | 1.20E-06 | 2.98E-06     | 4.169539 |
| COL4A1   | 2.136587 | 9.869108 | 5.045385 | 1.84E-06 | 4.46E-06     | 3.752992 |
| CRIP1    | 2.209437 | 8.418037 | 5.023176 | 2.02E-06 | 4.88E-06     | 3.661799 |
| LAPTM5   | 2.447935 | 9.885282 | 4.887061 | 3.58E-06 | 8.36E-06     | 3.108414 |
| MMP9     | 2.853058 | 10.05481 | 4.831425 | 4.50E-06 | 1.04E-05     | 2.885001 |
| BASP1    | 2.331306 | 10.07127 | 4.749771 | 6.30E-06 | 1.43E-05     | 2.560109 |
| NFE2L3   | 2.04723  | 7.297341 | 4.700537 | 7.70E-06 | 1.73E-05     | 2.365961 |
| CORO1A   | 2.321112 | 7.994298 | 4.606747 | 1.12E-05 | 2.47E-05     | 1.999825 |
| CCL19    | 3.163703 | 8.5001   | 4.36491  | 2.92E-05 | 6.11E-05     | 1.078946 |
| HLA-DRB1 | 2.070638 | 11.55822 | 4.355366 | 3.03E-05 | 6.32E-05     | 1.043309 |
| TYROBP   | 2.343191 | 8.678314 | 4.326146 | 3.40E-05 | 7.03E-05     | 0.93454  |
| C1QA     | 2.573849 | 9.696292 | 4.321535 | 3.46E-05 | 7.15E-05     | 0.917425 |
| ISG15    | 2.448932 | 9.701545 | 4.30024  | 3.75E-05 | 7.73E-05     | 0.838542 |
| CD9      | 2.420087 | 10.95204 | 4.29315  | 3.86E-05 | 7.94E-05     | 0.812341 |
| KRT8     | 2.801219 | 9.362724 | 4.255454 | 4.46E-05 | 9.10E-05     | 0.673542 |
| COL3A1   | 2.865768 | 10.90275 | 4.243282 | 4.67E-05 | 9.50E-05     | 0.628913 |
| CDH1     | 2.05525  | 7.086546 | 4.193025 | 5.66E-05 | 0.000114     | 0.445603 |
| C1QB     | 2.423139 | 8.815061 | 4.17265  | 6.11E-05 | 0.000122     | 0.371735 |
| CD74     | 2.277603 | 11.57639 | 4.055186 | 9.48E-05 | 0.000185     | -0.04902 |
| TGFBI    | 2.118771 | 9.716294 | 4.012553 | 0.000111 | 0.000215     | -0.19955 |
| ARHGDI1  | 2.017181 | 9.605089 | 3.998844 | 0.000117 | 0.000225     | -0.2477  |
| LUM      | 3.036576 | 9.076593 | 3.965671 | 0.000132 | 0.000252     | -0.36372 |
| HLA-DRA  | 2.676211 | 10.37743 | 3.938811 | 0.000145 | 0.000277     | -0.45713 |
| FZD5     | 2.072476 | 7.736783 | 3.908055 | 0.000163 | 0.000308     | -0.56351 |
| CD24     | 2.484677 | 8.700762 | 3.846955 | 0.000203 | 0.00038      | -0.77297 |
| IER3     | 2.002148 | 9.72681  | 3.779697 | 0.000258 | 0.000476     | -1.00064 |
| ANXA1    | 2.350583 | 9.24707  | 3.647495 | 0.000409 | 0.000736     | -1.43912 |
| IGJ      | 2.756591 | 7.464785 | 3.645847 | 0.000412 | 0.00074      | -1.44451 |
| COL5A2   | 2.204503 | 8.77171  | 3.550809 | 0.00057  | 0.001006     | -1.75208 |
| CCL2     | 2.099359 | 8.749958 | 3.550341 | 0.000571 | 0.001007     | -1.75358 |
| GBP1     | 2.085364 | 7.676152 | 3.533883 | 0.000604 | 0.001062     | -1.80619 |
| LY96     | 2.071412 | 7.296311 | 3.519403 | 0.000634 | 0.001112     | -1.85231 |
| VCAN     | 2.105023 | 8.667108 | 3.398051 | 0.000951 | 0.001624     | -2.23291 |
| RAB25    | 2.048519 | 7.313901 | 3.301617 | 0.001304 | 0.002185     | -2.52767 |
| MMP12    | 2.197765 | 7.59177  | 3.157813 | 0.002061 | 0.003358     | -2.95427 |
| ADAMDEC1 | 2.122861 | 7.383283 | 3.137978 | 0.002193 | 0.003558     | -3.01188 |
| SPP1     | 2.304872 | 9.292198 | 2.972414 | 0.003644 | 0.005747     | -3.48085 |

|          |          |          |          |          |          |          |
|----------|----------|----------|----------|----------|----------|----------|
| LIN28A   | 2.565314 | 8.567552 | 2.913406 | 0.004346 | 0.006784 | -3.64278 |
| POU5F1P3 | 2.305926 | 8.077748 | 2.774057 | 0.006524 | 0.009933 | -4.01413 |
| KRT19    | 2.407296 | 8.019048 | 2.468472 | 0.015137 | 0.021824 | -4.77262 |

## TCGA UP-DEGs

## Venn gene

|           |           |          |         |       |          |          |
|-----------|-----------|----------|---------|-------|----------|----------|
| A4GALT    | ENSG00000 | 45.15    | 8.44    | 2.289 | 8.68E-25 | PTPN6    |
| ABHD12B   | ENSG00000 | 18.191   | 0.86    | 3.367 | 4.95E-31 | GSTO1    |
| AC004057. | ENSG00000 | 971.115  | 224.846 | 2.106 | 5.55E-24 | TNFRSF1B |
| AC005255. | ENSG00000 | 7.65     | 0.81    | 2.257 | 5.00E-39 | LYZ      |
| AC005339. | ENSG00000 | 6.49     | 0       | 2.905 | 2.48E-43 | GIMAP4   |
| AC005682. | ENSG00000 | 14.68    | 1.02    | 2.957 | 8.74E-52 | DSP      |
| AC005943. | ENSG00000 | 7.27     | 0       | 3.048 | 7.34E-18 | CXCR4    |
| AC005943. | ENSG00000 | 19.271   | 0       | 4.341 | 1.80E-12 | EFEMP1   |
| AC008753. | ENSG00000 | 44.86    | 0.26    | 5.186 | 1.92E-61 | COL4A1   |
| AC009065. | ENSG00000 | 11.37    | 0       | 3.629 | 2.81E-73 | CRIP1    |
| AC010677. | ENSG00000 | 24       | 1.67    | 3.227 | 6.40E-11 | LAPTM5   |
| AC011558. | ENSG00000 | 68.46    | 9.99    | 2.66  | 6.00E-42 | MMP9     |
| AC021066. | ENSG00000 | 9.5      | 0       | 3.392 | 4.24E-08 | BASP1    |
| AC092580. | ENSG00000 | 5.96     | 0       | 2.799 | 5.36E-39 | NFE2L3   |
| AC104534. | ENSG00000 | 17.49    | 2.44    | 2.426 | 1.39E-10 | CORO1A   |
| AC133644. | ENSG00000 | 3.77     | 0.07    | 2.156 | 6.01E-50 | CCL19    |
| ACP5      | ENSG00000 | 67.06    | 3.9     | 3.796 | 6.07E-61 | HLA-DRB1 |
| ACTB      | ENSG00000 | 3840.556 | 832.38  | 2.205 | 9.87E-64 | TYROBP   |
| ACTG2     | ENSG00000 | 32.36    | 5.7     | 2.316 | 3.05E-13 | C1QA     |
| ADAMDEC1  | ENSG00000 | 12.14    | 0.22    | 3.429 | 2.56E-39 | ISG15    |
| ADD2      | ENSG00000 | 25.5     | 5.18    | 2.1   | 3.56E-20 | CD9      |
| ADGRE5    | ENSG00000 | 26.241   | 4.5     | 2.308 | 1.14E-41 | KRT8     |
| AEN       | ENSG00000 | 80.979   | 14.46   | 2.407 | 1.97E-39 | CDH1     |
| AIF1      | ENSG00000 | 55.491   | 3.41    | 3.679 | 3.68E-53 | C1QB     |
| AK4       | ENSG00000 | 88.101   | 9.58    | 3.074 | 2.63E-38 | CD74     |
| AK4P1     | ENSG00000 | 14.87    | 1.18    | 2.864 | 3.07E-29 | TGFB1    |
| AL162151. | ENSG00000 | 1067.928 | 88.781  | 3.574 | 6.66E-07 | ARHGDIB  |
| ALPL      | ENSG00000 | 262.086  | 7.74    | 4.912 | 5.07E-59 | LUM      |
| ALPP      | ENSG00000 | 4.16     | 0.15    | 2.166 | 8.46E-22 | HLA-DRA  |
| ALPPL2    | ENSG00000 | 57.579   | 0.35    | 5.439 | 1.37E-42 | FZD5     |
| AMICA1    | ENSG00000 | 9.72     | 1.41    | 2.153 | 1.18E-30 | CD24     |
| ANP32A    | ENSG00000 | 162.005  | 24.58   | 2.672 | 7.21E-68 | CCL2     |
| ANP32E    | ENSG00000 | 45.72    | 6.73    | 2.596 | 1.39E-70 | GBP1     |
| ANXA3     | ENSG00000 | 21.66    | 1.84    | 2.996 | 3.45E-56 | RAB25    |
| AOAH      | ENSG00000 | 9.6      | 0.96    | 2.435 | 1.03E-41 | MMP12    |
| AP003391. | ENSG00000 | 13.57    | 0.07    | 3.767 | 1.95E-04 | ADAMDEC1 |
| APEX1     | ENSG00000 | 226.128  | 33.7    | 2.711 | 4.49E-85 | SPP1     |
| APLNR     | ENSG00000 | 6.42     | 0.76    | 2.076 | 6.93E-24 | LIN28A   |
| APOC1     | ENSG00000 | 655.157  | 21.22   | 4.884 | 4.45E-64 | KRT19    |
| APOC1P1   | ENSG00000 | 10.52    | 0.4     | 3.041 | 7.98E-43 |          |
| APOE      | ENSG00000 | 1146.403 | 155.664 | 2.873 | 1.51E-46 |          |
| ARHGDIB   | ENSG00000 | 126.517  | 14.9    | 3.004 | 2.18E-50 |          |
| ARL4C     | ENSG00000 | 9.99     | 0.92    | 2.517 | 3.00E-60 |          |
| ARPC1B    | ENSG00000 | 256.87   | 34.53   | 2.86  | 3.82E-57 |          |
| ARRB1     | ENSG00000 | 17.289   | 3.27    | 2.099 | 7.16E-33 |          |
| ARSE      | ENSG00000 | 5        | 0.37    | 2.131 | 6.80E-17 |          |
| ATP2A3    | ENSG00000 | 22.77    | 4.55    | 2.099 | 7.00E-34 |          |

|          |           |          |         |       |          |
|----------|-----------|----------|---------|-------|----------|
| AURKB    | ENSG00000 | 49.309   | 1.9     | 4.117 | 2.19E-90 |
| B2M      | ENSG00000 | 3093.447 | 450.879 | 2.776 | 3.95E-34 |
| B3GNT7   | ENSG00000 | 8.51     | 1.23    | 2.092 | 9.03E-40 |
| BASP1    | ENSG00000 | 25.76    | 1.55    | 3.391 | 1.75E-72 |
| BATF     | ENSG00000 | 9.3      | 0.54    | 2.742 | 1.68E-50 |
| BATF3    | ENSG00000 | 10.71    | 1.72    | 2.106 | 2.59E-43 |
| BAX      | ENSG00000 | 235.796  | 38.019  | 2.601 | 4.98E-62 |
| BCL2A1   | ENSG00000 | 7.65     | 0.37    | 2.658 | 1.16E-35 |
| BFSP2    | ENSG00000 | 4.72     | 0.19    | 2.265 | 4.86E-34 |
| BICD1    | ENSG00000 | 57.249   | 5.07    | 3.262 | 5.63E-59 |
| BMF      | ENSG00000 | 21       | 2.22    | 2.772 | 1.91E-33 |
| BNIP3P17 | ENSG00000 | 17.93    | 0.41    | 3.747 | 6.23E-45 |
| C12orf57 | ENSG00000 | 468.075  | 108.623 | 2.097 | 1.38E-31 |
| C19orf33 | ENSG00000 | 14.19    | 2.09    | 2.297 | 4.33E-26 |
| C1QA     | ENSG00000 | 226.724  | 7.66    | 4.717 | 7.02E-50 |
| C1QB     | ENSG00000 | 226.347  | 10.52   | 4.303 | 1.95E-41 |
| C1QC     | ENSG00000 | 168.639  | 7.22    | 4.367 | 1.79E-47 |
| C2       | ENSG00000 | 25.91    | 3.64    | 2.536 | 1.13E-34 |
| C6orf132 | ENSG00000 | 8.98     | 0.89    | 2.401 | 4.11E-33 |
| CAPG     | ENSG00000 | 213.426  | 35.589  | 2.551 | 2.77E-48 |
| CAPN13   | ENSG00000 | 6.28     | 0.7     | 2.098 | 1.23E-20 |
| CARD16   | ENSG00000 | 15.68    | 2.13    | 2.414 | 1.66E-41 |
| CASC9    | ENSG00000 | 4.35     | 0.17    | 2.193 | 4.44E-51 |
| CASP1    | ENSG00000 | 13.32    | 1.89    | 2.309 | 1.17E-36 |
| CBR3     | ENSG00000 | 20.381   | 3.7     | 2.186 | 1.92E-29 |
| CCL18    | ENSG00000 | 10.83    | 1.52    | 2.231 | 1.47E-23 |
| CCL19    | ENSG00000 | 60.078   | 0.42    | 5.427 | 2.24E-45 |
| CCL2     | ENSG00000 | 46.52    | 4.1     | 3.22  | 4.37E-26 |
| CCL26    | ENSG00000 | 14.45    | 1.05    | 2.914 | 8.57E-19 |
| CCL3     | ENSG00000 | 20.81    | 0.72    | 3.665 | 4.46E-46 |
| CCL4     | ENSG00000 | 19.569   | 2.97    | 2.373 | 3.77E-24 |
| CCL4L2   | ENSG00000 | 8.94     | 0.27    | 2.968 | 3.98E-39 |
| CCL5     | ENSG00000 | 55.73    | 0.77    | 5.002 | 7.77E-62 |
| CCND2    | ENSG00000 | 75.992   | 4.92    | 3.701 | 8.83E-61 |
| CCR1     | ENSG00000 | 6.07     | 0.24    | 2.511 | 1.87E-49 |
| CCR5     | ENSG00000 | 5.88     | 0.09    | 2.658 | 1.10E-45 |
| CCT6A    | ENSG00000 | 399.983  | 92.027  | 2.108 | 2.12E-60 |
| CD14     | ENSG00000 | 41.14    | 7.48    | 2.313 | 3.03E-19 |
| CD2      | ENSG00000 | 18.4     | 1.33    | 3.058 | 1.40E-36 |
| CD24     | ENSG00000 | 36.319   | 4.54    | 2.752 | 2.25E-13 |
| CD247    | ENSG00000 | 7.23     | 0.76    | 2.225 | 7.66E-36 |
| CD27     | ENSG00000 | 14.78    | 0.3     | 3.602 | 2.46E-53 |
| CD300A   | ENSG00000 | 9.55     | 1.13    | 2.308 | 1.37E-49 |
| CD38     | ENSG00000 | 12.21    | 0.62    | 3.028 | 4.20E-32 |
| CD3D     | ENSG00000 | 23.309   | 0.72    | 3.821 | 1.84E-51 |
| CD3E     | ENSG00000 | 23       | 0.79    | 3.745 | 2.82E-48 |
| CD3EAP   | ENSG00000 | 13.13    | 2.32    | 2.09  | 4.43E-40 |
| CD4      | ENSG00000 | 27.57    | 3.2     | 2.766 | 4.19E-39 |
| CD44     | ENSG00000 | 32.751   | 6.1     | 2.249 | 4.90E-33 |

|           |           |          |         |       |          |
|-----------|-----------|----------|---------|-------|----------|
| CD48      | ENSG00000 | 24.97    | 2.48    | 2.9   | 3.02E-41 |
| CD52      | ENSG00000 | 105.018  | 1.32    | 5.514 | 1.23E-80 |
| CD53      | ENSG00000 | 49.921   | 2.95    | 3.688 | 2.77E-53 |
| CD68      | ENSG00000 | 87.997   | 0.92    | 5.535 | 5.27E-60 |
| CD7       | ENSG00000 | 14.91    | 0.87    | 3.089 | 5.32E-55 |
| CD74      | ENSG00000 | 1649.255 | 105.141 | 3.959 | 1.44E-49 |
| CD79A     | ENSG00000 | 17.47    | 0.48    | 3.642 | 3.50E-42 |
| CD8A      | ENSG00000 | 8.92     | 0.47    | 2.755 | 2.51E-36 |
| CD8B      | ENSG00000 | 5.17     | 0.21    | 2.35  | 1.24E-44 |
| CD9       | ENSG00000 | 483.709  | 26.85   | 4.121 | 7.85E-59 |
| CDA       | ENSG00000 | 11.51    | 1.66    | 2.234 | 5.85E-34 |
| CDCA7     | ENSG00000 | 40.051   | 6.03    | 2.546 | 2.54E-48 |
| CDH1      | ENSG00000 | 21.48    | 0.58    | 3.831 | 9.14E-39 |
| CDH3      | ENSG00000 | 57.42    | 3.35    | 3.747 | 1.33E-81 |
| CDK4      | ENSG00000 | 184.412  | 33.73   | 2.416 | 7.93E-67 |
| CDT1      | ENSG00000 | 48.701   | 5.95    | 2.838 | 2.71E-53 |
| CDX1      | ENSG00000 | 24.07    | 3.07    | 2.623 | 6.03E-16 |
| CEACAM6   | ENSG00000 | 4.44     | 0.16    | 2.229 | 2.28E-24 |
| CEBPA     | ENSG00000 | 11.78    | 1.25    | 2.506 | 1.46E-46 |
| CENPA     | ENSG00000 | 51.211   | 3.29    | 3.605 | 3.55E-70 |
| CGB8      | ENSG00000 | 4.14     | 0       | 2.362 | 3.26E-18 |
| CH507-513 | ENSG00000 | 6.06     | 0.38    | 2.355 | 1.13E-26 |
| CH507-528 | ENSG00000 | 6.06     | 0.38    | 2.355 | 1.13E-26 |
| CH507-9B2 | ENSG00000 | 3.9      | 0.04    | 2.236 | 1.41E-14 |
| CHEK2     | ENSG00000 | 49.121   | 10.64   | 2.106 | 2.62E-35 |
| CHI3L1    | ENSG00000 | 21.95    | 0.7     | 3.755 | 3.87E-21 |
| CHIT1     | ENSG00000 | 5.16     | 0.22    | 2.336 | 3.43E-17 |
| CHST2     | ENSG00000 | 23.55    | 2.3     | 2.895 | 2.11E-43 |
| CKMT1B    | ENSG00000 | 7.12     | 0.8     | 2.173 | 2.46E-30 |
| CKS1BP3   | ENSG00000 | 20.74    | 0.88    | 3.532 | 8.90E-49 |
| CLDN6     | ENSG00000 | 159.885  | 0.83    | 6.458 | #####    |
| CLDN7     | ENSG00000 | 30.84    | 3.15    | 2.94  | 2.17E-44 |
| CLEC4D    | ENSG00000 | 10.14    | 0.1     | 3.34  | 2.52E-36 |
| CNN2      | ENSG00000 | 78.732   | 15.401  | 2.281 | 3.53E-55 |
| COL4A1    | ENSG00000 | 50.98    | 10.6    | 2.164 | 2.63E-33 |
| CORO1A    | ENSG00000 | 72.238   | 3.37    | 4.067 | 6.14E-63 |
| COX7B     | ENSG00000 | 129.167  | 22.751  | 2.454 | 6.63E-57 |
| CPXM1     | ENSG00000 | 31.48    | 3.66    | 2.801 | 2.39E-51 |
| CRABP1    | ENSG00000 | 23.74    | 0.78    | 3.797 | 6.40E-38 |
| CRB3      | ENSG00000 | 6.87     | 0.53    | 2.363 | 2.63E-21 |
| CRIP1     | ENSG00000 | 332.059  | 17.93   | 4.137 | 3.15E-69 |
| CRYGEP    | ENSG00000 | 11.39    | 0.12    | 3.468 | 1.76E-37 |
| CSF2RA    | ENSG00000 | 6.18     | 0.73    | 2.053 | 1.68E-38 |
| CST7      | ENSG00000 | 12.89    | 0.58    | 3.136 | 1.85E-42 |
| CTB-151G2 | ENSG00000 | 9.74     | 0.53    | 2.811 | 6.35E-27 |
| CTB-151G2 | ENSG00000 | 12.98    | 1.57    | 2.443 | 1.37E-16 |
| CTB-63M22 | ENSG00000 | 103.349  | 12.59   | 2.941 | 1.18E-43 |
| CTC-260E6 | ENSG00000 | 23.489   | 1.13    | 3.523 | 5.29E-30 |
| CTC-260E6 | ENSG00000 | 35.409   | 0.77    | 4.362 | 3.11E-55 |

|           |           |          |          |       |          |
|-----------|-----------|----------|----------|-------|----------|
| CTC-260E6 | ENSG00000 | 13.45    | 0.87     | 2.95  | 7.05E-32 |
| CTD-2196E | ENSG00000 | 6.55     | 0.59     | 2.247 | 5.78E-05 |
| CTD-2354A | ENSG00000 | 6.93     | 0.45     | 2.451 | 6.61E-23 |
| CTD-2396E | ENSG00000 | 6.39     | 0.67     | 2.146 | 1.26E-19 |
| CTD-2510F | ENSG00000 | 6.36     | 0.3      | 2.501 | 1.64E-53 |
| CTD-2540E | ENSG00000 | 19       | 1.2      | 3.184 | 1.12E-58 |
| CTHRC1    | ENSG00000 | 13.71    | 2.3      | 2.156 | 1.32E-32 |
| CTSB      | ENSG00000 | 367.881  | 49.401   | 2.872 | 1.66E-52 |
| CTSC      | ENSG00000 | 130.788  | 14.11    | 3.125 | 2.05E-55 |
| CTSS      | ENSG00000 | 62.808   | 2.23     | 4.304 | 5.06E-47 |
| CTSZ      | ENSG00000 | 145.199  | 32.549   | 2.124 | 2.25E-31 |
| CXCL10    | ENSG00000 | 31.811   | 0.23     | 4.737 | 1.00E-62 |
| CXCL11    | ENSG00000 | 6.04     | 0.11     | 2.665 | 1.41E-38 |
| CXCL13    | ENSG00000 | 8.07     | 0.79     | 2.341 | 2.01E-18 |
| CXCL9     | ENSG00000 | 50.86    | 1.96     | 4.131 | 8.06E-37 |
| CXCR2P1   | ENSG00000 | 4.49     | 0.07     | 2.359 | 1.54E-35 |
| CXCR3     | ENSG00000 | 6.44     | 0.24     | 2.585 | 5.69E-39 |
| CXCR4     | ENSG00000 | 48.62    | 4.07     | 3.291 | 1.74E-56 |
| CXCR6     | ENSG00000 | 5.42     | 0.18     | 2.444 | 1.68E-34 |
| CYBA      | ENSG00000 | 153.393  | 9.89     | 3.826 | 3.92E-77 |
| CYBB      | ENSG00000 | 11.89    | 0.6      | 3.01  | 5.66E-43 |
| CYP2S1    | ENSG00000 | 73.059   | 1        | 5.211 | 2.16E-74 |
| DACT2     | ENSG00000 | 8.33     | 1.03     | 2.2   | 6.44E-25 |
| DEFB1     | ENSG00000 | 5.19     | 0.38     | 2.165 | 9.51E-22 |
| DENND1C   | ENSG00000 | 11.29    | 1.91     | 2.078 | 5.31E-69 |
| DERA      | ENSG00000 | 58.871   | 8.65     | 2.633 | 4.79E-68 |
| DLG3      | ENSG00000 | 45.87    | 2.56     | 3.719 | 4.02E-82 |
| DMD       | ENSG00000 | 32.17    | 6.01     | 2.242 | 3.59E-40 |
| DNMT3L    | ENSG00000 | 16.72    | 0.27     | 3.802 | 3.60E-22 |
| DPPA3     | ENSG00000 | 168.709  | 0.57     | 6.756 | 5.45E-50 |
| DPPA3P2   | ENSG00000 | 11.7     | 0.18     | 3.428 | 1.26E-28 |
| DPPA4     | ENSG00000 | 104.112  | 4.68     | 4.21  | 1.14E-33 |
| DPPA5     | ENSG00000 | 377.438  | 1.5      | 7.242 | 5.87E-36 |
| DSC2      | ENSG00000 | 5.7      | 0.45     | 2.208 | 5.54E-53 |
| DSCC1     | ENSG00000 | 14.23    | 2.4      | 2.163 | 5.66E-53 |
| DSG2      | ENSG00000 | 15.38    | 1.59     | 2.661 | 1.42E-52 |
| DSP       | ENSG00000 | 35.631   | 1.81     | 3.704 | 4.56E-77 |
| DSTNP2    | ENSG00000 | 43.251   | 5.19     | 2.838 | 1.16E-51 |
| EEF1A1    | ENSG00000 | 9013.051 | 1767.996 | 2.349 | 2.86E-75 |
| EEF1A1P12 | ENSG00000 | 4.15     | 0.17     | 2.138 | 3.46E-63 |
| EEF1A1P5  | ENSG00000 | 200.546  | 24.17    | 3.001 | 6.99E-38 |
| EEF1A1P6  | ENSG00000 | 21.96    | 3.16     | 2.464 | 2.68E-51 |
| EFEMP1    | ENSG00000 | 46.339   | 3.14     | 3.515 | 9.92E-31 |
| EFNA4     | ENSG00000 | 20.29    | 3.17     | 2.352 | 3.00E-76 |
| EIF3K     | ENSG00000 | 552.909  | 97.673   | 2.489 | 7.76E-70 |
| EIF4EBP1  | ENSG00000 | 83.227   | 14.21    | 2.469 | 9.81E-77 |
| ELF3      | ENSG00000 | 24.319   | 0.97     | 3.684 | 5.47E-39 |
| ELOVL6    | ENSG00000 | 23.07    | 0.83     | 3.717 | 1.24E-65 |
| EMG1      | ENSG00000 | 102.7    | 13.72    | 2.817 | 1.10E-81 |

|          |           |          |          |       |          |
|----------|-----------|----------|----------|-------|----------|
| ENO2     | ENSG00000 | 94.549   | 14.17    | 2.655 | 1.30E-43 |
| TMEM176A | ENSG00000 | 31.2     | 5.81     | 2.241 | 1.19E-17 |
| RECQL    | ENSG00000 | 26.629   | 5.57     | 2.072 | 7.79E-36 |
| NDUFAB1  | ENSG00000 | 354.366  | 83.141   | 2.078 | 2.14E-32 |
| ITGAL    | ENSG00000 | 12.63    | 1.51     | 2.441 | 9.57E-35 |
| PLEKHG6  | ENSG00000 | 11.83    | 1.32     | 2.467 | 1.26E-18 |
| MGST1    | ENSG00000 | 71.461   | 13.18    | 2.353 | 1.43E-13 |
| IL32     | ENSG00000 | 182.265  | 16.21    | 3.413 | 1.00E-41 |
| NME2     | ENSG00000 | 34.441   | 4.06     | 2.808 | 6.82E-33 |
| TSPAN9   | ENSG00000 | 54.059   | 6.68     | 2.842 | 9.41E-54 |
| TYROBP   | ENSG00000 | 137.615  | 9.4      | 3.736 | 2.77E-54 |
| GPRC5A   | ENSG00000 | 40.14    | 1.2      | 4.225 | 1.65E-35 |
| NLRP2    | ENSG00000 | 147.155  | 23.18    | 2.615 | 6.59E-23 |
| TYMP     | ENSG00000 | 52.691   | 5.89     | 2.962 | 3.72E-35 |
| SLAMF7   | ENSG00000 | 19.311   | 0.09     | 4.22  | 1.49E-49 |
| SH2D2A   | ENSG00000 | 7.32     | 0.64     | 2.343 | 2.56E-64 |
| TNFRSF1B | ENSG00000 | 18.1     | 2.79     | 2.333 | 1.12E-38 |
| NSMAF    | ENSG00000 | 61.239   | 11.31    | 2.338 | 1.37E-36 |
| LCP2     | ENSG00000 | 15.67    | 3.02     | 2.052 | 4.08E-27 |
| NFE2L3   | ENSG00000 | 85.247   | 3.59     | 4.232 | 6.10E-72 |
| PRSS8    | ENSG00000 | 16.52    | 0.84     | 3.251 | 2.92E-35 |
| NNAT     | ENSG00000 | 27.959   | 6.13     | 2.022 | 2.40E-15 |
| TRAF3IP2 | ENSG00000 | 19.73    | 4.04     | 2.04  | 8.94E-45 |
| GYG2     | ENSG00000 | 10.38    | 1.28     | 2.319 | 8.97E-55 |
| PRDM1    | ENSG00000 | 15.95    | 1.09     | 3.02  | 4.71E-42 |
| SLC2A3   | ENSG00000 | 74.63    | 13.81    | 2.352 | 3.66E-22 |
| MRPS35   | ENSG00000 | 80.392   | 17.259   | 2.156 | 1.76E-41 |
| RPL18    | ENSG00000 | 2780.058 | 628.905  | 2.142 | 3.66E-65 |
| ERBB3    | ENSG00000 | 21.17    | 2.84     | 2.529 | 2.44E-44 |
| NGEF     | ENSG00000 | 30.759   | 5.22     | 2.352 | 6.61E-18 |
| SPI1     | ENSG00000 | 27.029   | 4.16     | 2.442 | 7.96E-36 |
| PRR11    | ENSG00000 | 13.43    | 1.23     | 2.694 | 2.29E-62 |
| OSBPL3   | ENSG00000 | 18.4     | 3.17     | 2.218 | 2.91E-26 |
| RPL31    | ENSG00000 | 4174.535 | 1016.855 | 2.036 | 2.73E-67 |
| HSD17B10 | ENSG00000 | 149.872  | 29.709   | 2.297 | 1.59E-63 |
| ST6GAL1  | ENSG00000 | 45.379   | 2.04     | 3.931 | 9.22E-68 |
| TPD52    | ENSG00000 | 47.221   | 7.12     | 2.57  | 2.25E-52 |
| RARB     | ENSG00000 | 6.58     | 0.49     | 2.347 | 1.50E-38 |
| NFKB2    | ENSG00000 | 69.748   | 16.22    | 2.039 | 2.07E-31 |
| FBLN1    | ENSG00000 | 155.158  | 26.17    | 2.523 | 2.71E-38 |
| PTPRC    | ENSG00000 | 15.43    | 1.64     | 2.638 | 4.36E-30 |
| PLOD1    | ENSG00000 | 112.407  | 15.37    | 2.792 | 6.85E-72 |
| GSTP1    | ENSG00000 | 634.729  | 62.439   | 3.325 | 2.51E-69 |
| FCN1     | ENSG00000 | 8.34     | 0.24     | 2.913 | 2.69E-46 |
| SNX10    | ENSG00000 | 22.99    | 2.02     | 2.99  | 1.90E-43 |
| FTL      | ENSG00000 | 3055.514 | 441.386  | 2.789 | 2.71E-49 |
| TFAP2C   | ENSG00000 | 63.99    | 0.62     | 5.326 | 1.52E-58 |
| RPL6     | ENSG00000 | 2031.316 | 299.31   | 2.759 | 7.15E-96 |
| RBBP9    | ENSG00000 | 16.16    | 3        | 2.101 | 4.93E-44 |

|          |           |          |         |       |          |
|----------|-----------|----------|---------|-------|----------|
| OAS1     | ENSG00000 | 23.41    | 4.01    | 2.285 | 2.40E-29 |
| RPLP0    | ENSG00000 | 3900.652 | 583.504 | 2.739 | 2.23E-90 |
| FXYD5    | ENSG00000 | 115.551  | 11.36   | 3.237 | 5.34E-63 |
| LYZ      | ENSG00000 | 176.264  | 2.43    | 5.692 | 4.30E-53 |
| TFAP4    | ENSG00000 | 17.04    | 2.67    | 2.297 | 6.40E-62 |
| MSH2     | ENSG00000 | 75.719   | 17.21   | 2.075 | 1.08E-36 |
| TREM2    | ENSG00000 | 7        | 0.27    | 2.655 | 3.35E-38 |
| SUSD2    | ENSG00000 | 77.918   | 5.69    | 3.56  | 5.61E-25 |
| PRODH    | ENSG00000 | 90.183   | 4.85    | 3.962 | 9.01E-48 |
| LGALS2   | ENSG00000 | 17.98    | 0.16    | 4.032 | 1.22E-53 |
| XBP1     | ENSG00000 | 149.862  | 21.529  | 2.743 | 7.83E-73 |
| MCM5     | ENSG00000 | 118.742  | 28.111  | 2.04  | 1.72E-45 |
| IL2RB    | ENSG00000 | 7.67     | 0.76    | 2.3   | 8.87E-36 |
| GZMH     | ENSG00000 | 6.49     | 0.25    | 2.583 | 8.10E-40 |
| GZMB     | ENSG00000 | 20.569   | 0.27    | 4.086 | 1.03E-46 |
| PYGL     | ENSG00000 | 44.569   | 7.29    | 2.459 | 5.15E-38 |
| SPTLC2   | ENSG00000 | 24.68    | 4.63    | 2.189 | 1.67E-54 |
| MTHFD1   | ENSG00000 | 67.451   | 10.41   | 2.585 | 4.37E-70 |
| TCL1A    | ENSG00000 | 77.799   | 10.62   | 2.762 | 8.18E-06 |
| MMP9     | ENSG00000 | 92.25    | 1.11    | 5.466 | 1.27E-67 |
| MYBL2    | ENSG00000 | 359.387  | 20.629  | 4.058 | 3.75E-52 |
| SALL4    | ENSG00000 | 43.901   | 6.65    | 2.553 | 4.49E-38 |
| TRIB3    | ENSG00000 | 12       | 1.88    | 2.174 | 6.87E-57 |
| HCK      | ENSG00000 | 12.75    | 1.78    | 2.306 | 2.47E-36 |
| RENBP    | ENSG00000 | 15       | 2.07    | 2.382 | 5.02E-34 |
| PIM2     | ENSG00000 | 235.583  | 11.17   | 4.281 | 2.59E-45 |
| PQBP1    | ENSG00000 | 154.964  | 30.391  | 2.313 | 2.44E-67 |
| PGK1     | ENSG00000 | 363.295  | 62.292  | 2.525 | 1.06E-38 |
| FGD1     | ENSG00000 | 22.68    | 3.27    | 2.471 | 1.27E-54 |
| PIN4     | ENSG00000 | 43.901   | 7.8     | 2.351 | 5.63E-72 |
| RBM3     | ENSG00000 | 386.787  | 88.07   | 2.122 | 2.14E-42 |
| QPRT     | ENSG00000 | 57.759   | 3.32    | 3.766 | 1.32E-76 |
| PYCARD   | ENSG00000 | 36.031   | 2.96    | 3.225 | 1.76E-63 |
| LAPTM4B  | ENSG00000 | 254.866  | 47.33   | 2.404 | 1.20E-36 |
| ESRP1    | ENSG00000 | 67.681   | 1.4     | 4.839 | 1.66E-95 |
| MAN2B1   | ENSG00000 | 103.028  | 17.21   | 2.514 | 6.38E-70 |
| MAP4K1   | ENSG00000 | 39.17    | 3.61    | 3.123 | 7.14E-45 |
| TNNT1    | ENSG00000 | 85.318   | 15.79   | 2.362 | 2.34E-33 |
| RPS16    | ENSG00000 | 2964.554 | 626.121 | 2.241 | 3.18E-73 |
| SHD      | ENSG00000 | 14.95    | 0.68    | 3.247 | 7.79E-38 |
| LIM2     | ENSG00000 | 15.88    | 0.19    | 3.826 | 2.77E-35 |
| RPS19    | ENSG00000 | 5665.548 | 847.458 | 2.74  | 2.28E-93 |
| NKG7     | ENSG00000 | 36.829   | 0.91    | 4.308 | 1.20E-53 |
| RPL18A   | ENSG00000 | 2592.448 | 471.985 | 2.455 | 2.80E-68 |
| ETHE1    | ENSG00000 | 39.94    | 6.5     | 2.449 | 3.44E-55 |
| TSPAN13  | ENSG00000 | 36.171   | 5.97    | 2.415 | 7.89E-56 |
| TMEM176B | ENSG00000 | 56.712   | 12.04   | 2.146 | 8.83E-18 |
| PDLIM1   | ENSG00000 | 99.532   | 19.99   | 2.26  | 6.80E-55 |
| RPL28    | ENSG00000 | 3450.524 | 783.722 | 2.137 | 1.13E-79 |



|         |           |          |         |       |          |
|---------|-----------|----------|---------|-------|----------|
| ZMIZ1   | ENSG00000 | 37.909   | 6.45    | 2.385 | 6.90E-38 |
| RPL19   | ENSG00000 | 3488.762 | 823.713 | 2.081 | 9.31E-92 |
| PFN1    | ENSG00000 | 987.611  | 138.668 | 2.823 | 8.33E-86 |
| UNC93B1 | ENSG00000 | 17.91    | 2.65    | 2.373 | 4.59E-53 |
| MS4A6A  | ENSG00000 | 35.05    | 5.15    | 2.551 | 1.12E-24 |
| FOLR1   | ENSG00000 | 6.09     | 0.37    | 2.372 | 1.09E-26 |
| IL10RA  | ENSG00000 | 9.93     | 1.28    | 2.261 | 1.28E-33 |
| SLC15A3 | ENSG00000 | 46.898   | 10.42   | 2.068 | 3.93E-33 |
| MDK     | ENSG00000 | 425.612  | 25.141  | 4.029 | 5.27E-58 |
| KRT18   | ENSG00000 | 91.829   | 10      | 3.077 | 2.90E-12 |
| PPM1H   | ENSG00000 | 15.47    | 1.39    | 2.785 | 3.54E-52 |
| WNT5B   | ENSG00000 | 17.8     | 2.65    | 2.365 | 2.03E-24 |
| MAGOHB  | ENSG00000 | 82.002   | 11.73   | 2.705 | 3.39E-79 |
| OAS2    | ENSG00000 | 13       | 1.58    | 2.44  | 1.41E-39 |
| FZD10   | ENSG00000 | 3.9      | 0.22    | 2.006 | 4.03E-40 |
| GAPDH   | ENSG00000 | 6497.188 | 988.981 | 2.715 | 7.32E-70 |
| PTPN6   | ENSG00000 | 59.672   | 9.35    | 2.551 | 2.56E-70 |
| NANOG   | ENSG00000 | 223.572  | 0.35    | 7.378 | 7.67E-54 |
| GOLT1B  | ENSG00000 | 40.901   | 9.35    | 2.017 | 5.72E-39 |
| LDHB    | ENSG00000 | 1302.167 | 144.246 | 3.165 | 5.24E-61 |
| MDFI    | ENSG00000 | 78.912   | 6.57    | 3.4   | 2.73E-59 |
| GZMK    | ENSG00000 | 9.36     | 0.3     | 2.994 | 7.84E-38 |
| IRX4    | ENSG00000 | 6.89     | 0.85    | 2.093 | 7.71E-20 |
| RRP9    | ENSG00000 | 63.131   | 14.45   | 2.053 | 5.08E-50 |
| TFCP2L1 | ENSG00000 | 18.56    | 1.38    | 3.039 | 7.00E-33 |
| FN1     | ENSG00000 | 185.708  | 38.419  | 2.244 | 7.25E-19 |
| GNLY    | ENSG00000 | 20.21    | 0.73    | 3.616 | 3.11E-44 |
| HSPE1   | ENSG00000 | 414.491  | 66.04   | 2.632 | 3.02E-67 |
| PLEK    | ENSG00000 | 15.67    | 1.37    | 2.814 | 5.34E-37 |
| RPL22   | ENSG00000 | 1011.232 | 169.882 | 2.566 | 1.34E-79 |
| SRM     | ENSG00000 | 250.713  | 52.261  | 2.241 | 4.37E-60 |
| OLFML3  | ENSG00000 | 26.33    | 5.32    | 2.112 | 9.82E-20 |
| MYCL    | ENSG00000 | 18.74    | 1.57    | 2.941 | 1.14E-50 |
| PLA2G2D | ENSG00000 | 10.08    | 0.06    | 3.386 | 5.91E-26 |
| GBP1    | ENSG00000 | 22.68    | 4.8     | 2.03  | 2.86E-23 |
| SLC2A1  | ENSG00000 | 66.132   | 9.93    | 2.619 | 9.66E-31 |
| PRDX1   | ENSG00000 | 904.263  | 163.233 | 2.463 | 2.82E-57 |
| MAN1C1  | ENSG00000 | 56.102   | 6.04    | 3.02  | 4.02E-37 |
| SPP1    | ENSG00000 | 37.569   | 5.55    | 2.558 | 1.80E-11 |
| SET     | ENSG00000 | 391.725  | 79.621  | 2.284 | 1.02E-49 |
| FKBP1B  | ENSG00000 | 17.33    | 3.24    | 2.112 | 1.16E-57 |
| EPCAM   | ENSG00000 | 137.911  | 21.17   | 2.647 | 8.87E-40 |
| TGFBI   | ENSG00000 | 39.719   | 8.01    | 2.176 | 2.82E-27 |
| PLBD1   | ENSG00000 | 139.729  | 12.34   | 3.399 | 6.64E-51 |
| KCNJ8   | ENSG00000 | 8.3      | 1.1     | 2.147 | 6.50E-31 |
| TNFSF10 | ENSG00000 | 16.09    | 2.36    | 2.347 | 5.34E-30 |
| SASH3   | ENSG00000 | 10.92    | 0.54    | 2.952 | 1.52E-47 |
| GLIPR2  | ENSG00000 | 45.61    | 3.95    | 3.235 | 2.61E-50 |
| PLAU    | ENSG00000 | 22.52    | 0.98    | 3.57  | 7.91E-62 |

|          |           |          |         |       |          |
|----------|-----------|----------|---------|-------|----------|
| SLC25A16 | ENSG00000 | 33.13    | 3.61    | 2.888 | 9.45E-38 |
| FAM124B  | ENSG00000 | 5.11     | 0.18    | 2.372 | 1.57E-30 |
| RPS10    | ENSG00000 | 3233.094 | 744.949 | 2.116 | 1.46E-71 |
| SOX4     | ENSG00000 | 51.41    | 7.78    | 2.578 | 3.11E-71 |
| MT1G     | ENSG00000 | 227.149  | 3.43    | 5.687 | 7.55E-37 |
| RPL23    | ENSG00000 | 2208.727 | 422.204 | 2.384 | 4.76E-70 |
| RTN2     | ENSG00000 | 19.83    | 3.29    | 2.28  | 8.30E-62 |
| MMP24    | ENSG00000 | 13.47    | 0.45    | 3.319 | 7.23E-45 |
| HCST     | ENSG00000 | 45.141   | 3.89    | 3.238 | 1.07E-48 |
| IFI6     | ENSG00000 | 298.999  | 70.629  | 2.066 | 4.78E-15 |
| PTPN12   | ENSG00000 | 116.872  | 23.76   | 2.251 | 1.70E-43 |
| SRD5A3   | ENSG00000 | 24.2     | 4.5     | 2.196 | 3.19E-42 |
| YWHAH    | ENSG00000 | 92.097   | 21.75   | 2.033 | 7.70E-49 |
| RAC2     | ENSG00000 | 43.971   | 2.31    | 3.764 | 2.17E-56 |
| PODXL    | ENSG00000 | 33.569   | 4.14    | 2.75  | 3.93E-30 |
| SOX15    | ENSG00000 | 85.989   | 3.45    | 4.289 | 2.21E-44 |
| FAM64A   | ENSG00000 | 11.87    | 0.6     | 3.008 | 3.08E-53 |
| FGF13    | ENSG00000 | 15.71    | 2.7     | 2.175 | 3.94E-38 |
| HDHD1    | ENSG00000 | 25.351   | 4.25    | 2.327 | 1.61E-65 |
| STARD8   | ENSG00000 | 7.11     | 1.02    | 2.005 | 1.39E-35 |
| GDPD2    | ENSG00000 | 6.9      | 0.07    | 2.884 | 7.04E-53 |
| ZSCAN10  | ENSG00000 | 10.89    | 0.31    | 3.182 | 8.78E-32 |
| RPL36    | ENSG00000 | 2127.14  | 401.316 | 2.403 | 8.63E-80 |
| LSP1     | ENSG00000 | 54.879   | 11.99   | 2.105 | 9.86E-26 |
| NPAS1    | ENSG00000 | 7.79     | 1.1     | 2.065 | 2.15E-31 |
| LILRB2   | ENSG00000 | 9.29     | 0.64    | 2.649 | 2.40E-46 |
| PYY      | ENSG00000 | 17.96    | 1.45    | 2.952 | 2.14E-27 |
| IDO1     | ENSG00000 | 9.75     | 0.43    | 2.91  | 1.33E-41 |
| RPL27    | ENSG00000 | 3182.4   | 548.367 | 2.535 | 9.66E-80 |
| LIN28A   | ENSG00000 | 75.081   | 6.53    | 3.337 | 2.80E-27 |
| JCHAIN   | ENSG00000 | 74.962   | 0.71    | 5.473 | 7.30E-55 |
| RAB25    | ENSG00000 | 10.7     | 0.97    | 2.57  | 8.72E-36 |
| TPT1     | ENSG00000 | 4412.864 | 931.169 | 2.243 | 1.73E-64 |
| RARRES3  | ENSG00000 | 36.671   | 5.28    | 2.585 | 3.64E-24 |
| GIMAP4   | ENSG00000 | 21.69    | 2.57    | 2.668 | 1.72E-37 |
| VRTN     | ENSG00000 | 17.62    | 2.18    | 2.55  | 3.26E-36 |
| LOXL2    | ENSG00000 | 46.211   | 3.3     | 3.457 | 1.46E-64 |
| FKBP11   | ENSG00000 | 71.5     | 16.54   | 2.047 | 4.92E-57 |
| MYCN     | ENSG00000 | 51.94    | 3.28    | 3.629 | 2.34E-58 |
| RPS15A   | ENSG00000 | 2789.517 | 632.27  | 2.14  | 3.06E-75 |
| LRP4     | ENSG00000 | 34.35    | 3.16    | 3.087 | 5.42E-60 |
| HNRNPA1  | ENSG00000 | 1883.629 | 335.762 | 2.484 | 2.94E-80 |
| ITM2C    | ENSG00000 | 334.021  | 27.521  | 3.554 | 8.21E-65 |
| GPNMB    | ENSG00000 | 73.602   | 14.26   | 2.289 | 5.73E-30 |
| MYO1G    | ENSG00000 | 7.14     | 0.88    | 2.114 | 2.94E-42 |
| GYPC     | ENSG00000 | 50.011   | 6.96    | 2.68  | 5.02E-44 |
| TXN      | ENSG00000 | 303.341  | 32.17   | 3.198 | 1.85E-67 |
| SIT1     | ENSG00000 | 5.46     | 0.11    | 2.541 | 6.19E-52 |
| PIM1     | ENSG00000 | 91.938   | 13.66   | 2.664 | 5.29E-57 |

|           |           |          |          |       |          |
|-----------|-----------|----------|----------|-------|----------|
| TUBB2B    | ENSG00000 | 40.059   | 1.47     | 4.055 | 1.42E-60 |
| HMGA1     | ENSG00000 | 491.312  | 107.061  | 2.188 | 7.61E-24 |
| TCF19     | ENSG00000 | 14.58    | 2.63     | 2.102 | 2.79E-63 |
| MRPL15    | ENSG00000 | 126.158  | 14.32    | 3.053 | 3.56E-75 |
| SDCBP     | ENSG00000 | 148.621  | 32.561   | 2.156 | 4.08E-44 |
| RPLP1     | ENSG00000 | 4014.764 | 609.549  | 2.717 | 1.69E-86 |
| RPL7P9    | ENSG00000 | 85.65    | 9.72     | 3.015 | 1.92E-61 |
| RPS24     | ENSG00000 | 5482.43  | 1042.187 | 2.394 | 3.21E-84 |
| TET1      | ENSG00000 | 9.99     | 0.2      | 3.195 | 4.35E-70 |
| YARS2     | ENSG00000 | 49.531   | 11.27    | 2.042 | 7.90E-65 |
| FAM60A    | ENSG00000 | 114.61   | 20.599   | 2.42  | 3.49E-34 |
| RPL14P1   | ENSG00000 | 19.929   | 2.99     | 2.391 | 7.81E-61 |
| LUM       | ENSG00000 | 67.859   | 14.74    | 2.129 | 6.51E-12 |
| NPFF      | ENSG00000 | 5.01     | 0.01     | 2.573 | 4.85E-27 |
| ITGB7     | ENSG00000 | 5.9      | 0.71     | 2.013 | 7.97E-33 |
| GALNT6    | ENSG00000 | 18.92    | 0.76     | 3.501 | 5.88E-77 |
| RAB15     | ENSG00000 | 109.348  | 2.74     | 4.883 | 1.89E-75 |
| ZNF710    | ENSG00000 | 15.46    | 2.49     | 2.238 | 6.94E-74 |
| ITGAX     | ENSG00000 | 11.06    | 0.96     | 2.621 | 1.38E-36 |
| IGSF6     | ENSG00000 | 8.54     | 0.32     | 2.853 | 2.62E-40 |
| RPS2      | ENSG00000 | 4142.826 | 594.362  | 2.799 | 8.30E-96 |
| PMAIP1    | ENSG00000 | 17.8     | 1.76     | 2.768 | 1.47E-46 |
| GRB7      | ENSG00000 | 20.5     | 1.95     | 2.866 | 1.02E-37 |
| FBN3      | ENSG00000 | 11.44    | 1.12     | 2.553 | 1.57E-35 |
| RPL13A    | ENSG00000 | 4152.889 | 820.75   | 2.338 | 3.70E-69 |
| SH3BGR3   | ENSG00000 | 130.843  | 29.881   | 2.094 | 1.88E-52 |
| RPL11     | ENSG00000 | 3470.192 | 610.225  | 2.506 | 7.50E-91 |
| RPS8      | ENSG00000 | 2840.442 | 468.173  | 2.598 | 1.63E-77 |
| XCL2      | ENSG00000 | 3.16     | 0        | 2.057 | 1.79E-40 |
| RPS27A    | ENSG00000 | 2258.579 | 561.794  | 2.005 | 7.94E-49 |
| HSPD1     | ENSG00000 | 393.575  | 73.991   | 2.396 | 1.26E-54 |
| RP11-977G | ENSG00000 | 7.61     | 0.7      | 2.34  | 6.86E-17 |
| PLAC8     | ENSG00000 | 6.21     | 0.63     | 2.145 | 2.65E-33 |
| SFRP2     | ENSG00000 | 47.811   | 1.14     | 4.512 | 1.91E-54 |
| RPL37     | ENSG00000 | 2954.503 | 548.177  | 2.428 | 6.19E-91 |
| SKP2      | ENSG00000 | 14.55    | 2.88     | 2.003 | 9.89E-57 |
| GZMA      | ENSG00000 | 20.12    | 0.45     | 3.864 | 2.29E-48 |
| TNFAIP8   | ENSG00000 | 14.51    | 2.67     | 2.079 | 3.60E-57 |
| PLA2G7    | ENSG00000 | 10.56    | 0.2      | 3.268 | 6.25E-48 |
| MSN       | ENSG00000 | 101.482  | 19.211   | 2.342 | 2.53E-49 |
| IL2RG     | ENSG00000 | 38.109   | 1.51     | 3.962 | 8.68E-53 |
| RPL10     | ENSG00000 | 3693.312 | 511.431  | 2.85  | 1.14E-55 |
| PRDM14    | ENSG00000 | 21.17    | 0.45     | 3.934 | 1.10E-28 |
| RPL7      | ENSG00000 | 2834.345 | 614.342  | 2.204 | 1.35E-53 |
| STOM      | ENSG00000 | 166.571  | 28.46    | 2.508 | 5.68E-38 |
| MKI67     | ENSG00000 | 23.271   | 3.79     | 2.341 | 4.02E-56 |
| INA       | ENSG00000 | 18.8     | 3.13     | 2.261 | 6.24E-22 |
| GSTO1     | ENSG00000 | 101.567  | 18.5     | 2.395 | 2.28E-47 |
| RGS10     | ENSG00000 | 62.921   | 3.98     | 3.682 | 2.94E-76 |

|           |           |          |         |       |          |
|-----------|-----------|----------|---------|-------|----------|
| SLC43A1   | ENSG00000 | 48.431   | 4.9     | 3.067 | 1.04E-18 |
| SERPINH1  | ENSG00000 | 250.557  | 33.739  | 2.856 | 4.81E-55 |
| RPS3      | ENSG00000 | 3259.42  | 684.828 | 2.249 | 1.39E-66 |
| VENTX     | ENSG00000 | 33.639   | 1.3     | 3.913 | 1.31E-39 |
| LPCAT1    | ENSG00000 | 65.78    | 11.42   | 2.427 | 1.07E-70 |
| THY1      | ENSG00000 | 107.373  | 10.3    | 3.262 | 3.92E-56 |
| PITPNC1   | ENSG00000 | 26.15    | 3.95    | 2.455 | 8.21E-45 |
| GBP5      | ENSG00000 | 19.49    | 2.27    | 2.648 | 3.95E-25 |
| MAGED4    | ENSG00000 | 19.191   | 0.81    | 3.48  | 4.35E-40 |
| PDIA4     | ENSG00000 | 150.351  | 30.659  | 2.257 | 8.68E-52 |
| RMND1     | ENSG00000 | 53.341   | 11.4    | 2.132 | 3.59E-45 |
| SLA       | ENSG00000 | 7.42     | 1.02    | 2.059 | 9.86E-27 |
| PCDH1     | ENSG00000 | 14.56    | 2.03    | 2.36  | 7.75E-41 |
| RPL30     | ENSG00000 | 3746.427 | 843.298 | 2.15  | 1.05E-66 |
| NODAL     | ENSG00000 | 12.21    | 2.26    | 2.019 | 3.61E-17 |
| UTP14A    | ENSG00000 | 18.621   | 2.53    | 2.475 | 3.25E-65 |
| MX1       | ENSG00000 | 85.698   | 8.87    | 3.135 | 3.62E-35 |
| LDLRAP1   | ENSG00000 | 43.779   | 7.9     | 2.331 | 2.09E-48 |
| KRTCAP3   | ENSG00000 | 29.14    | 6.25    | 2.056 | 4.94E-48 |
| FAM46B    | ENSG00000 | 103.917  | 8.02    | 3.54  | 2.96E-27 |
| NCF1      | ENSG00000 | 10.86    | 1.39    | 2.311 | 2.64E-27 |
| SLAMF8    | ENSG00000 | 14.05    | 0.91    | 2.978 | 2.66E-37 |
| FCER1G    | ENSG00000 | 89.411   | 6.54    | 3.584 | 6.33E-44 |
| LAD1      | ENSG00000 | 12.93    | 0.45    | 3.264 | 4.60E-65 |
| IGF2BP1   | ENSG00000 | 36.921   | 4.92    | 2.679 | 1.16E-37 |
| GIP       | ENSG00000 | 40.439   | 0.44    | 4.847 | 2.61E-28 |
| PTMS      | ENSG00000 | 568.138  | 130.598 | 2.113 | 1.56E-40 |
| ITGB2     | ENSG00000 | 53.701   | 2.32    | 4.042 | 1.68E-50 |
| VAV2      | ENSG00000 | 27.689   | 6.13    | 2.009 | 6.72E-42 |
| RUSC1     | ENSG00000 | 41.18    | 8.98    | 2.079 | 9.78E-38 |
| LY6E      | ENSG00000 | 413.229  | 65.199  | 2.646 | 4.27E-52 |
| FOXH1     | ENSG00000 | 32.5     | 1.35    | 3.833 | 4.85E-43 |
| RPL8      | ENSG00000 | 5915.973 | 712.822 | 3.051 | 1.35E-90 |
| ZNF385A   | ENSG00000 | 25.871   | 4.05    | 2.412 | 1.51E-47 |
| FAM171A2  | ENSG00000 | 8.49     | 0.76    | 2.431 | 2.83E-43 |
| RPL26     | ENSG00000 | 3394.538 | 716.736 | 2.242 | 3.63E-69 |
| POLR3K    | ENSG00000 | 19.43    | 3.25    | 2.265 | 7.03E-67 |
| PDPN      | ENSG00000 | 146.361  | 4.14    | 4.841 | 2.88E-49 |
| LAPTM5    | ENSG00000 | 73.659   | 4.39    | 3.792 | 9.41E-52 |
| GBP4      | ENSG00000 | 13.94    | 1.17    | 2.783 | 5.67E-45 |
| VANGL2    | ENSG00000 | 16.11    | 2.62    | 2.241 | 1.97E-57 |
| PQLC3     | ENSG00000 | 85.23    | 8.99    | 3.11  | 1.61E-36 |
| TNFAIP8L2 | ENSG00000 | 6.31     | 0.56    | 2.228 | 5.74E-41 |
| S100A11   | ENSG00000 | 530.496  | 118.102 | 2.158 | 3.00E-21 |
| FZD5      | ENSG00000 | 16.52    | 0.52    | 3.527 | 6.33E-51 |
| IFI16     | ENSG00000 | 105.229  | 21.75   | 2.223 | 3.83E-24 |
| SNHG16    | ENSG00000 | 101.04   | 19.56   | 2.311 | 2.85E-70 |
| RPL9      | ENSG00000 | 1639.34  | 405.623 | 2.012 | 9.36E-60 |
| TKT       | ENSG00000 | 232.743  | 53.02   | 2.113 | 6.59E-44 |

|           |           |          |         |       |          |
|-----------|-----------|----------|---------|-------|----------|
| F2RL1     | ENSG00000 | 19.83    | 0.43    | 3.865 | 2.67E-77 |
| SCGB3A2   | ENSG00000 | 31.13    | 0.13    | 4.83  | 7.89E-53 |
| RPS14     | ENSG00000 | 1964.708 | 452.539 | 2.116 | 2.34E-69 |
| SOX17     | ENSG00000 | 26.23    | 4.03    | 2.437 | 7.14E-18 |
| FBP1      | ENSG00000 | 20.47    | 2.25    | 2.724 | 4.49E-22 |
| SLC7A3    | ENSG00000 | 35.661   | 1.03    | 4.175 | 3.11E-49 |
| SPTSSA    | ENSG00000 | 34.009   | 5.66    | 2.394 | 1.54E-55 |
| FOLR2     | ENSG00000 | 14.91    | 2.85    | 2.047 | 1.54E-18 |
| OTX2      | ENSG00000 | 7.83     | 0.54    | 2.519 | 2.46E-29 |
| SALL2     | ENSG00000 | 14.34    | 1.77    | 2.469 | 1.07E-55 |
| GYLTL1B   | ENSG00000 | 45.55    | 3.91    | 3.245 | 2.79E-57 |
| SPINT1    | ENSG00000 | 84.752   | 2.69    | 4.539 | 1.75E-91 |
| RPL27A    | ENSG00000 | 3085.31  | 524.899 | 2.553 | 2.02E-87 |
| SNX20     | ENSG00000 | 4.65     | 0.26    | 2.165 | 2.06E-40 |
| TUBA1C    | ENSG00000 | 831.515  | 39.659  | 4.356 | 1.14E-57 |
| NLRP7     | ENSG00000 | 105.411  | 4.96    | 4.158 | 9.19E-26 |
| TK1       | ENSG00000 | 37.369   | 4.15    | 2.897 | 1.51E-68 |
| RPSA      | ENSG00000 | 3353.146 | 476.753 | 2.812 | 1.82E-73 |
| GBX2      | ENSG00000 | 6.89     | 0.81    | 2.124 | 1.77E-20 |
| SEMA4C    | ENSG00000 | 51.002   | 6.8     | 2.737 | 4.66E-43 |
| PLA2G4F   | ENSG00000 | 9.02     | 0.16    | 3.111 | 2.39E-35 |
| LGALS9    | ENSG00000 | 57.739   | 8.59    | 2.615 | 5.69E-41 |
| SLC25A6   | ENSG00000 | 574.315  | 82.481  | 2.785 | 2.60E-57 |
| RAB3B     | ENSG00000 | 6.92     | 0.38    | 2.521 | 4.00E-58 |
| RNASE6    | ENSG00000 | 14.39    | 1.61    | 2.56  | 2.01E-37 |
| MT1E      | ENSG00000 | 114.578  | 12.68   | 3.079 | 7.74E-24 |
| GPRC5C    | ENSG00000 | 60.48    | 7.29    | 2.891 | 2.78E-55 |
| KRT8      | ENSG00000 | 158.495  | 12.5    | 3.562 | 4.43E-24 |
| MZB1      | ENSG00000 | 31.051   | 0.56    | 4.361 | 1.67E-45 |
| SMAGP     | ENSG00000 | 74.899   | 10.68   | 2.7   | 5.14E-46 |
| ZNF296    | ENSG00000 | 22.42    | 3       | 2.55  | 7.62E-33 |
| KRT19     | ENSG00000 | 25.98    | 4.46    | 2.305 | 1.12E-09 |
| RGS19     | ENSG00000 | 14.7     | 2.72    | 2.077 | 5.75E-78 |
| TMEM51    | ENSG00000 | 23.669   | 3.26    | 2.534 | 6.66E-58 |
| UTF1      | ENSG00000 | 51.349   | 7.76    | 2.579 | 1.46E-11 |
| RRM2      | ENSG00000 | 47.359   | 5.87    | 2.815 | 2.61E-46 |
| RPS21     | ENSG00000 | 3199.653 | 683.784 | 2.225 | 2.99E-64 |
| RPS7      | ENSG00000 | 2555.34  | 552.296 | 2.208 | 2.49E-94 |
| POP7      | ENSG00000 | 78.221   | 16.731  | 2.16  | 6.71E-70 |
| MIR4435-2 | ENSG00000 | 22.65    | 3.05    | 2.546 | 3.46E-52 |
| GLRX      | ENSG00000 | 26.06    | 3.4     | 2.621 | 1.55E-50 |
| UQCRH     | ENSG00000 | 588.173  | 100.391 | 2.539 | 1.03E-59 |
| JUP       | ENSG00000 | 127.964  | 16.29   | 2.899 | 2.33E-56 |
| NRROS     | ENSG00000 | 11.93    | 1.87    | 2.172 | 7.09E-39 |
| PHLDA3    | ENSG00000 | 117.01   | 17.78   | 2.652 | 1.60E-47 |
| RPL4      | ENSG00000 | 3918.538 | 665.271 | 2.557 | 2.40E-93 |
| KIAA1551  | ENSG00000 | 166.444  | 23.131  | 2.795 | 1.31E-58 |
| UBE2C     | ENSG00000 | 146.118  | 22.33   | 2.657 | 7.89E-45 |
| SFN       | ENSG00000 | 7.42     | 0.7     | 2.308 | 1.54E-30 |

|           |           |          |         |       |          |
|-----------|-----------|----------|---------|-------|----------|
| ETV4      | ENSG00000 | 142.586  | 1.22    | 6.015 | 5.80E-98 |
| GPX2      | ENSG00000 | 76.119   | 3.55    | 4.083 | 1.09E-43 |
| PRR15     | ENSG00000 | 7.71     | 0.71    | 2.349 | 9.62E-37 |
| NANOGP1   | ENSG00000 | 48.64    | 0.71    | 4.859 | 2.77E-42 |
| VSIG10    | ENSG00000 | 52.8     | 10.37   | 2.242 | 2.99E-36 |
| RPRM      | ENSG00000 | 22.92    | 1.51    | 3.252 | 3.84E-59 |
| RPLP2     | ENSG00000 | 2293.602 | 563.588 | 2.023 | 7.21E-73 |
| GLDC      | ENSG00000 | 65.33    | 4.29    | 3.648 | 3.19E-36 |
| MSC       | ENSG00000 | 25.47    | 3.84    | 2.451 | 1.22E-23 |
| RRS1      | ENSG00000 | 42.78    | 6.7     | 2.507 | 1.12E-74 |
| TRIML2    | ENSG00000 | 53.578   | 5.89    | 2.986 | 1.45E-20 |
| RCC2      | ENSG00000 | 208.354  | 28.111  | 2.846 | 1.36E-71 |
| ZFP42     | ENSG00000 | 42.961   | 2.54    | 3.634 | 2.86E-34 |
| GIMAP7    | ENSG00000 | 13.92    | 2.45    | 2.113 | 3.95E-28 |
| HLA-DQB1  | ENSG00000 | 71.958   | 8.57    | 2.93  | 4.47E-26 |
| 1-Sep     | ENSG00000 | 10.64    | 1.85    | 2.03  | 6.06E-29 |
| HCLS1     | ENSG00000 | 29.441   | 5.16    | 2.305 | 3.97E-29 |
| PRF1      | ENSG00000 | 8.35     | 0.22    | 2.938 | 1.26E-43 |
| RAP2B     | ENSG00000 | 14.77    | 2.51    | 2.168 | 2.24E-65 |
| SNRPE     | ENSG00000 | 324.19   | 79.269  | 2.018 | 2.54E-63 |
| IDH2      | ENSG00000 | 46.879   | 7.66    | 2.467 | 2.57E-55 |
| NOP10     | ENSG00000 | 202.741  | 48.22   | 2.049 | 2.10E-70 |
| SHMT2     | ENSG00000 | 95.49    | 12.07   | 2.884 | 5.07E-65 |
| RPS17     | ENSG00000 | 3548.269 | 447.485 | 2.984 | 3.85E-90 |
| LCK       | ENSG00000 | 12.1     | 0.75    | 2.904 | 7.47E-54 |
| UPP1      | ENSG00000 | 175.959  | 13.64   | 3.595 | 9.92E-39 |
| FAM162B   | ENSG00000 | 28.541   | 3.11    | 2.845 | 6.43E-29 |
| KIRREL    | ENSG00000 | 14.41    | 2.61    | 2.094 | 6.00E-25 |
| ST6GALNAC | ENSG00000 | 5.13     | 0.41    | 2.12  | 9.07E-44 |
| KCNK12    | ENSG00000 | 5.75     | 0.61    | 2.068 | 3.77E-35 |
| GDF3      | ENSG00000 | 99.023   | 0.22    | 6.357 | 3.07E-45 |
| SOCS3     | ENSG00000 | 16.95    | 1.98    | 2.591 | 7.78E-24 |
| ZNF93     | ENSG00000 | 17.94    | 3.69    | 2.014 | 1.89E-41 |
| MIXL1     | ENSG00000 | 4.87     | 0.45    | 2.017 | 1.42E-38 |
| PDE6G     | ENSG00000 | 17.421   | 2.45    | 2.417 | 1.57E-22 |
| P4HB      | ENSG00000 | 526.539  | 129.894 | 2.011 | 6.61E-61 |
| NLRP9     | ENSG00000 | 6.96     | 0.2     | 2.73  | 9.42E-17 |
| EVI2B     | ENSG00000 | 10.21    | 1.43    | 2.206 | 5.92E-30 |
| IFITM1    | ENSG00000 | 481.635  | 64.039  | 2.892 | 2.70E-29 |
| SAPCD2    | ENSG00000 | 5.98     | 0.65    | 2.081 | 4.58E-41 |
| TOR3A     | ENSG00000 | 42.65    | 4.85    | 2.899 | 6.00E-82 |
| RPS23     | ENSG00000 | 3761.78  | 838.402 | 2.164 | 2.29E-57 |
| HPDL      | ENSG00000 | 5.93     | 0.44    | 2.267 | 1.18E-30 |
| LILRB4    | ENSG00000 | 22.89    | 0.66    | 3.847 | 1.92E-44 |
| TNFRSF4   | ENSG00000 | 7.37     | 0.6     | 2.387 | 4.77E-54 |
| ERCC6L    | ENSG00000 | 11.72    | 0.75    | 2.862 | 1.11E-56 |
| FPR3      | ENSG00000 | 7.75     | 0.83    | 2.257 | 1.59E-31 |
| PTMA      | ENSG00000 | 1425.546 | 328.351 | 2.115 | 3.42E-82 |
| NANOS3    | ENSG00000 | 198.555  | 8.06    | 4.461 | 8.11E-09 |

|           |           |          |         |       |          |
|-----------|-----------|----------|---------|-------|----------|
| ISG15     | ENSG00000 | 158.385  | 9.67    | 3.901 | 8.10E-50 |
| TMSB4XP8  | ENSG00000 | 11.51    | 0       | 3.645 | 3.47E-20 |
| SPRY4     | ENSG00000 | 20.019   | 2.42    | 2.62  | 5.48E-29 |
| TCEA1     | ENSG00000 | 115.896  | 25.23   | 2.156 | 3.51E-40 |
| HIST1H1C  | ENSG00000 | 160.618  | 30.3    | 2.368 | 7.91E-17 |
| SELL      | ENSG00000 | 7.44     | 0.76    | 2.262 | 1.30E-30 |
| ZDHC9     | ENSG00000 | 25.12    | 4.24    | 2.317 | 1.08E-47 |
| RPL14     | ENSG00000 | 1687.532 | 262.504 | 2.68  | 6.16E-88 |
| KLRG2     | ENSG00000 | 44.851   | 0.21    | 5.244 | 2.09E-48 |
| LITAF     | ENSG00000 | 74.227   | 7.46    | 3.153 | 6.60E-52 |
| S100A14   | ENSG00000 | 8.13     | 0.83    | 2.319 | 8.15E-17 |
| HLA-DRB1  | ENSG00000 | 210.08   | 22.65   | 3.158 | 1.33E-39 |
| S100A4    | ENSG00000 | 92.021   | 21.159  | 2.07  | 1.42E-24 |
| TUBB      | ENSG00000 | 1027.127 | 103.271 | 3.302 | 1.30E-88 |
| EPHB4     | ENSG00000 | 109.31   | 18.09   | 2.531 | 3.28E-57 |
| HSH2D     | ENSG00000 | 6.25     | 0.5     | 2.273 | 2.30E-51 |
| HLA-DQA1  | ENSG00000 | 69.391   | 1.75    | 4.678 | 1.29E-49 |
| SERPINA1  | ENSG00000 | 43.299   | 2.26    | 3.764 | 5.27E-38 |
| SPN       | ENSG00000 | 6.12     | 0.15    | 2.63  | 1.37E-47 |
| MPEG1     | ENSG00000 | 13.6     | 0.62    | 3.172 | 2.83E-51 |
| TEAD4     | ENSG00000 | 108.337  | 5.18    | 4.145 | 4.64E-74 |
| RPL12     | ENSG00000 | 2545.793 | 456.793 | 2.476 | 2.73E-70 |
| RPS4X     | ENSG00000 | 1906.353 | 189.768 | 3.322 | 2.15E-66 |
| MT1F      | ENSG00000 | 37.681   | 3.31    | 3.166 | 5.20E-35 |
| HLA-DRB5  | ENSG00000 | 39.62    | 2.46    | 3.553 | 1.19E-15 |
| WDHD1     | ENSG00000 | 44.78    | 7.02    | 2.513 | 1.87E-43 |
| PPIAP22   | ENSG00000 | 231.6    | 21.52   | 3.369 | 7.03E-78 |
| GLMP      | ENSG00000 | 68.998   | 13.35   | 2.286 | 1.81E-50 |
| RPL10A    | ENSG00000 | 1611.288 | 334.021 | 2.267 | 1.46E-48 |
| PNP       | ENSG00000 | 55.718   | 10.38   | 2.317 | 9.20E-46 |
| RPL39     | ENSG00000 | 3704.594 | 457.395 | 3.015 | 8.08E-65 |
| FCGR3A    | ENSG00000 | 24.69    | 1.64    | 3.283 | 6.51E-45 |
| KHDC3L    | ENSG00000 | 239.568  | 0.39    | 7.435 | 5.57E-44 |
| HLA-DOA   | ENSG00000 | 7.97     | 0.64    | 2.451 | 9.96E-48 |
| HNRNPCP2  | ENSG00000 | 16.999   | 2.69    | 2.286 | 2.95E-60 |
| HLA-DMA   | ENSG00000 | 56.712   | 10.54   | 2.322 | 3.40E-33 |
| PSMB8     | ENSG00000 | 43.371   | 7.88    | 2.321 | 2.88E-27 |
| HLA-DRA   | ENSG00000 | 508.885  | 26.53   | 4.211 | 1.02E-52 |
| LST1      | ENSG00000 | 26.82    | 3.15    | 2.745 | 2.93E-44 |
| HLA-C     | ENSG00000 | 409.096  | 84.641  | 2.26  | 1.76E-37 |
| POU5F1    | ENSG00000 | 1381.959 | 1.15    | 9.329 | 8.08E-67 |
| HLA-E     | ENSG00000 | 196.896  | 45.86   | 2.078 | 1.52E-25 |
| GNB2L1    | ENSG00000 | 2101.057 | 471.494 | 2.153 | 1.02E-74 |
| MT1H      | ENSG00000 | 64.811   | 0.21    | 5.765 | 4.61E-36 |
| TMSB4X    | ENSG00000 | 3739.422 | 475.894 | 2.971 | 2.63E-60 |
| RP11-706C | ENSG00000 | 32.88    | 7.42    | 2.009 | 2.27E-73 |
| HLA-H     | ENSG00000 | 19.73    | 3.74    | 2.129 | 2.57E-18 |
| TRIM71    | ENSG00000 | 25.72    | 4.53    | 2.273 | 2.79E-28 |
| SNORA70   | ENSG00000 | 25.44    | 4.95    | 2.152 | 5.00E-08 |

|          |           |          |       |       |          |
|----------|-----------|----------|-------|-------|----------|
| SNORD15B | ENSG00000 | 3.2      | 0     | 2.07  | 1.35E-07 |
| IGKC     | ENSG00000 | 5973.661 | 9.24  | 9.189 | 2.92E-60 |
| IGKV4-1  | ENSG00000 | 176.386  | 0.14  | 7.282 | 6.69E-50 |
| IGLV4-69 | ENSG00000 | 19.66    | 0     | 4.369 | 2.32E-26 |
| IGLV8-61 | ENSG00000 | 5.23     | 0     | 2.639 | 2.26E-18 |
| IGLV6-57 | ENSG00000 | 29.08    | 1.09  | 3.847 | 4.95E-27 |
| IGLV1-51 | ENSG00000 | 64.511   | 1.81  | 4.543 | 1.26E-30 |
| IGLV1-47 | ENSG00000 | 88.15    | 0.22  | 6.191 | 5.78E-38 |
| IGLV7-46 | ENSG00000 | 4.24     | 0     | 2.39  | 1.08E-21 |
| IGLV1-44 | ENSG00000 | 59.379   | 0.17  | 5.689 | 1.06E-35 |
| IGLV7-43 | ENSG00000 | 4.45     | 0     | 2.446 | 1.10E-21 |
| IGLV1-40 | ENSG00000 | 71.699   | 0.35  | 5.751 | 1.21E-38 |
| IGLV3-25 | ENSG00000 | 92.231   | 0     | 6.543 | 2.33E-41 |
| IGLV2-23 | ENSG00000 | 62.691   | 0.13  | 5.817 | 3.81E-43 |
| IGLV3-21 | ENSG00000 | 55.18    | 1.96  | 4.246 | 5.76E-25 |
| IGLV3-19 | ENSG00000 | 72.188   | 0     | 6.194 | 1.67E-39 |
| IGLV2-14 | ENSG00000 | 138.389  | 0.29  | 6.756 | 2.11E-45 |
| IGLV2-11 | ENSG00000 | 29.97    | 0.21  | 4.678 | 2.84E-30 |
| IGLV3-10 | ENSG00000 | 22.73    | 0     | 4.569 | 9.88E-34 |
| IGLV3-1  | ENSG00000 | 110.407  | 0     | 6.8   | 1.99E-44 |
| IGLC1    | ENSG00000 | 674.137  | 1.54  | 8.054 | 2.93E-56 |
| IGLC2    | ENSG00000 | 1718.458 | 2.17  | 9.083 | 1.09E-59 |
| IGLC3    | ENSG00000 | 1056.15  | 1.24  | 8.882 | 2.34E-57 |
| IGLC7    | ENSG00000 | 5.44     | 0.41  | 2.191 | 2.79E-17 |
| TRBV25-1 | ENSG00000 | 31.99    | 1.15  | 3.94  | 2.48E-45 |
| TRBC2    | ENSG00000 | 60.761   | 11.01 | 2.362 | 4.25E-21 |
| TRDC     | ENSG00000 | 6.1      | 0.08  | 2.717 | 1.56E-38 |
| IGHA2    | ENSG00000 | 14.65    | 0.93  | 3.019 | 1.12E-26 |
| IGHG4    | ENSG00000 | 67.841   | 1.64  | 4.705 | 3.04E-35 |
| IGHG2    | ENSG00000 | 371.057  | 1.95  | 6.979 | 1.38E-52 |
| IGHA1    | ENSG00000 | 186.275  | 3.17  | 5.489 | 2.89E-41 |
| IGHG1    | ENSG00000 | 4046.895 | 6.87  | 9.007 | 2.26E-58 |
| IGHG3    | ENSG00000 | 585.124  | 0.71  | 8.421 | 6.58E-59 |
| IGHM     | ENSG00000 | 418.91   | 1.42  | 7.439 | 2.49E-52 |
| IGHV1-2  | ENSG00000 | 31.321   | 0     | 5.014 | 4.95E-34 |
| IGHV2-5  | ENSG00000 | 11.74    | 0.19  | 3.42  | 6.01E-22 |
| IGHV3-7  | ENSG00000 | 6.43     | 0     | 2.893 | 8.75E-17 |
| IGHV3-11 | ENSG00000 | 15.88    | 0     | 4.077 | 2.53E-31 |
| IGHV3-15 | ENSG00000 | 38.711   | 0     | 5.311 | 1.59E-35 |
| IGHV1-18 | ENSG00000 | 35.641   | 0.2   | 4.932 | 5.19E-31 |
| IGHV3-21 | ENSG00000 | 44.019   | 0     | 5.492 | 1.85E-38 |
| IGHV3-23 | ENSG00000 | 88.199   | 0.2   | 6.216 | 2.99E-43 |
| IGHV3-33 | ENSG00000 | 74.392   | 0.19  | 5.985 | 8.13E-39 |
| IGHV4-34 | ENSG00000 | 23.99    | 0.21  | 4.368 | 1.45E-32 |
| IGHV4-39 | ENSG00000 | 36.75    | 0.19  | 4.987 | 9.56E-30 |
| IGHV1-46 | ENSG00000 | 8.56     | 0.09  | 3.133 | 7.52E-22 |
| IGHV3-48 | ENSG00000 | 4.31     | 0     | 2.409 | 1.22E-19 |
| IGHV3-49 | ENSG00000 | 11.33    | 0.93  | 2.675 | 1.56E-14 |
| IGHV5-51 | ENSG00000 | 39.45    | 0.15  | 5.136 | 1.07E-36 |



|           |           |          |          |       |          |
|-----------|-----------|----------|----------|-------|----------|
| IGHV4-61  | ENSG00000 | 11.4     | 0        | 3.632 | 6.60E-21 |
| IGHV1-69  | ENSG00000 | 7.62     | 0        | 3.108 | 9.83E-20 |
| IGHV3-73  | ENSG00000 | 5.17     | 0        | 2.625 | 3.88E-20 |
| SNORA45B  | ENSG00000 | 3.03     | 0        | 2.011 | 7.95E-05 |
| RP11-641E | ENSG00000 | 607.145  | 47.722   | 3.642 | 2.23E-97 |
| TCL1B     | ENSG00000 | 36.59    | 3.55     | 3.046 | 1.85E-14 |
| RPS7P11   | ENSG00000 | 8.58     | 0.78     | 2.428 | 6.29E-71 |
| PTPRCAP   | ENSG00000 | 20.649   | 1.32     | 3.222 | 2.33E-44 |
| RPL18AP3  | ENSG00000 | 72.378   | 15.19    | 2.18  | 5.66E-47 |
| RPLP0P6   | ENSG00000 | 46       | 3.29     | 3.454 | 1.01E-62 |
| LBH       | ENSG00000 | 57.15    | 12.51    | 2.106 | 6.16E-38 |
| RPS29     | ENSG00000 | 6099.604 | 1441.544 | 2.08  | 8.32E-53 |
| UBD       | ENSG00000 | 42.019   | 0.45     | 4.891 | 7.62E-51 |
| PPM1N     | ENSG00000 | 34.999   | 2.23     | 3.478 | 1.53E-39 |
| ZNF90     | ENSG00000 | 31.899   | 2.63     | 3.18  | 8.91E-46 |
| FOXI3     | ENSG00000 | 10.38    | 0.35     | 3.076 | 2.02E-41 |
| RPL7P1    | ENSG00000 | 29.39    | 5.06     | 2.326 | 1.38E-42 |
| PHB2      | ENSG00000 | 590.952  | 67.111   | 3.12  | 1.04E-81 |
| LINC00189 | ENSG00000 | 6.6      | 0.28     | 2.57  | 9.62E-51 |
| IFI30     | ENSG00000 | 228.095  | 5.66     | 5.104 | 2.56E-77 |
| RPS2P55   | ENSG00000 | 7.84     | 0.3      | 2.766 | #####    |
| RP11-40C6 | ENSG00000 | 1135.175 | 0        | 10.15 | #####    |
| RP11-572F | ENSG00000 | 1106.969 | 234.996  | 2.231 | 1.01E-22 |
| LINC00152 | ENSG00000 | 28.47    | 2.2      | 3.203 | 8.65E-59 |
| HLA-DPB1  | ENSG00000 | 177.195  | 14.63    | 3.511 | 4.73E-52 |
| UBE2SP2   | ENSG00000 | 30.13    | 2.37     | 3.208 | 1.24E-57 |
| IGHV4-59  | ENSG00000 | 36.671   | 0        | 5.235 | 9.18E-39 |
| HLA-DPB2  | ENSG00000 | 3.72     | 0.05     | 2.168 | 9.57E-33 |
| HNRNPA1P4 | ENSG00000 | 31.8     | 6.97     | 2.041 | 6.47E-66 |
| RP11-5106 | ENSG00000 | 76.468   | 7.8      | 3.138 | 6.73E-72 |
| IGHV3-74  | ENSG00000 | 13.12    | 0.23     | 3.521 | 2.38E-23 |
| GCSHP5    | ENSG00000 | 40.419   | 5.91     | 2.584 | 1.02E-53 |
| RPL35P5   | ENSG00000 | 14.09    | 1.34     | 2.689 | 3.05E-75 |
| RP4-706A1 | ENSG00000 | 43.09    | 9.13     | 2.122 | 1.04E-62 |
| LINC00937 | ENSG00000 | 15.2     | 2.2      | 2.34  | 2.28E-33 |
| RPS28P7   | ENSG00000 | 1271.045 | 116.419  | 3.437 | 5.41E-93 |
| LTB       | ENSG00000 | 24.19    | 0.83     | 3.783 | 8.92E-49 |
| HMG1P37   | ENSG00000 | 8.48     | 0        | 3.245 | 8.18E-74 |
| HLA-DRB6  | ENSG00000 | 8.91     | 0.47     | 2.753 | 4.33E-38 |
| XIST      | ENSG00000 | 128.559  | 7.87     | 3.869 | 1.27E-18 |
| TMSB4XP6  | ENSG00000 | 15.08    | 0        | 4.007 | 2.08E-07 |
| TCEA1P2   | ENSG00000 | 9.73     | 1.43     | 2.143 | 4.55E-19 |
| LINC01160 | ENSG00000 | 32.401   | 3.93     | 2.76  | 2.17E-10 |
| HLA-DPA1  | ENSG00000 | 165.455  | 15.43    | 3.341 | 2.01E-42 |
| IGHV4-31  | ENSG00000 | 5.48     | 0        | 2.696 | 3.74E-19 |
| RPS18     | ENSG00000 | 7370.26  | 1048.854 | 2.812 | 4.25E-88 |
| SNRPF1    | ENSG00000 | 4.24     | 0        | 2.39  | 9.56E-55 |
| FTH1P7    | ENSG00000 | 19.74    | 2.33     | 2.639 | 8.51E-59 |
| IGHV3-43  | ENSG00000 | 4.24     | 0.24     | 2.079 | 2.02E-15 |

|           |           |          |         |       |          |
|-----------|-----------|----------|---------|-------|----------|
| RP11-132A | ENSG00000 | 14.68    | 0.07    | 3.873 | 5.74E-32 |
| RP11-132A | ENSG00000 | 33.889   | 0.44    | 4.599 | 1.64E-60 |
| HLA-DQB2  | ENSG00000 | 6.13     | 0.58    | 2.174 | 1.37E-22 |
| ERVH48-1  | ENSG00000 | 29.229   | 0.41    | 4.422 | 2.86E-38 |
| GAS5      | ENSG00000 | 547.455  | 119.27  | 2.189 | 6.84E-56 |
| RPL23AP42 | ENSG00000 | 1726.697 | 274.735 | 2.647 | 1.67E-58 |
| FABP5P7   | ENSG00000 | 103.852  | 20.019  | 2.319 | 1.28E-26 |
| RPL39P3   | ENSG00000 | 724.83   | 67.841  | 3.398 | 5.27E-26 |
| RPL6P27   | ENSG00000 | 19.69    | 3.49    | 2.204 | 1.93E-67 |
| GAPDHP14  | ENSG00000 | 3.48     | 0.11    | 2.013 | 1.91E-42 |
| RPL13AP5  | ENSG00000 | 122.947  | 22.45   | 2.402 | 3.21E-57 |
| RP11-390F | ENSG00000 | 5.19     | 0.18    | 2.391 | 3.98E-32 |
| HLA-DQA2  | ENSG00000 | 7.44     | 0.45    | 2.541 | 4.00E-20 |
| UBE2Q2P6  | ENSG00000 | 1854.737 | 417.171 | 2.15  | 2.96E-20 |
| OR2I1P    | ENSG00000 | 3.02     | 0       | 2.007 | 1.31E-30 |
| RP11-464E | ENSG00000 | 4.68     | 0.39    | 2.031 | 1.83E-62 |
| TXNDC5    | ENSG00000 | 83.719   | 17.4    | 2.203 | 7.95E-42 |
| NME1      | ENSG00000 | 162.545  | 34.22   | 2.215 | 4.63E-69 |
| IGKV1-6   | ENSG00000 | 7.04     | 0.14    | 2.818 | 1.15E-21 |
| IGKV3-20  | ENSG00000 | 336.065  | 0.4     | 7.911 | 3.48E-54 |
| IGKV1D-33 | ENSG00000 | 5.77     | 0       | 2.759 | 1.23E-26 |
| PSMB9     | ENSG00000 | 47.94    | 6.09    | 2.787 | 1.50E-35 |
| U47924.6  | ENSG00000 | 33.3     | 4.98    | 2.52  | 4.56E-33 |
| IGKV1-17  | ENSG00000 | 28.68    | 0       | 4.891 | 9.31E-29 |
| L1TD1     | ENSG00000 | 119.858  | 4.7     | 4.406 | 2.99E-43 |
| IGKV1-8   | ENSG00000 | 19.08    | 0.12    | 4.164 | 1.14E-31 |
| IGKV1-16  | ENSG00000 | 17.67    | 0       | 4.223 | 1.42E-29 |
| TDGF1     | ENSG00000 | 9.38     | 0.81    | 2.52  | 1.47E-16 |
| IGKV2-24  | ENSG00000 | 7.89     | 0       | 3.152 | 1.56E-24 |
| RPL36A    | ENSG00000 | 3483.205 | 287.555 | 3.594 | 2.42E-91 |
| IGKV3-11  | ENSG00000 | 364.101  | 0.67    | 7.772 | 1.85E-56 |
| IGKV1-9   | ENSG00000 | 28.06    | 0       | 4.861 | 2.21E-36 |
| IGKV1-33  | ENSG00000 | 133.768  | 0.14    | 6.885 | 1.67E-45 |
| MTFP1     | ENSG00000 | 25.359   | 5.14    | 2.102 | 5.49E-49 |
| IGKV2D-28 | ENSG00000 | 31.95    | 0       | 5.042 | 6.61E-32 |
| HLA-DMB   | ENSG00000 | 44.111   | 3.73    | 3.254 | 5.09E-40 |
| RP11-408F | ENSG00000 | 11.32    | 1.43    | 2.342 | 2.67E-67 |
| IGKV2-30  | ENSG00000 | 9.39     | 0       | 3.377 | 3.45E-28 |
| IGKV2D-29 | ENSG00000 | 7.2      | 0       | 3.036 | 5.47E-25 |
| RN7SL8P   | ENSG00000 | 4.43     | 0       | 2.441 | 2.35E-33 |
| IGKV1-5   | ENSG00000 | 76.298   | 0.14    | 6.083 | 1.55E-45 |
| NME1-NME2 | ENSG00000 | 711.045  | 101.581 | 2.795 | 3.30E-75 |
| LEFTY1    | ENSG00000 | 8.44     | 1.16    | 2.128 | 7.95E-21 |
| IGKV2-28  | ENSG00000 | 178.687  | 0       | 7.489 | 8.85E-46 |
| RP11-466H | ENSG00000 | 527.05   | 85.959  | 2.602 | 7.16E-51 |
| IGKV3-15  | ENSG00000 | 104.516  | 0.24    | 6.411 | 1.63E-44 |
| RP11-10G1 | ENSG00000 | 5.72     | 0       | 2.748 | 6.03E-92 |
| IGKV1-27  | ENSG00000 | 18.87    | 0       | 4.313 | 2.82E-32 |
| MTND4P12  | ENSG00000 | 37.46    | 0.53    | 4.652 | 6.76E-20 |

|           |           |          |         |       |          |
|-----------|-----------|----------|---------|-------|----------|
| PCED1B-AS | ENSG00000 | 14.48    | 1.08    | 2.896 | 3.03E-44 |
| RP11-148E | ENSG00000 | 42.411   | 0.28    | 5.084 | 6.00E-54 |
| RP11-256F | ENSG00000 | 5.76     | 0       | 2.757 | 6.63E-07 |
| RP11-148E | ENSG00000 | 5.58     | 0.08    | 2.607 | 3.63E-39 |
| RP11-253E | ENSG00000 | 11.22    | 0.69    | 2.854 | 7.19E-44 |
| IGKV1D-39 | ENSG00000 | 244.416  | 0.32    | 7.539 | 4.14E-54 |
| TRNP1     | ENSG00000 | 25.01    | 2.86    | 2.752 | 5.05E-66 |
| RP11-798K | ENSG00000 | 4.24     | 0       | 2.39  | 3.74E-27 |
| LYN       | ENSG00000 | 11.57    | 1.78    | 2.177 | 6.41E-47 |
| IGLL5     | ENSG00000 | 75.358   | 1.5     | 4.933 | 6.12E-41 |
| MEX3A     | ENSG00000 | 11.67    | 0.84    | 2.784 | 6.16E-51 |
| PIGY      | ENSG00000 | 14.52    | 2.3     | 2.234 | 2.24E-11 |
| NANOGP8   | ENSG00000 | 54.56    | 0.99    | 4.803 | 1.07E-23 |
| RP11-277E | ENSG00000 | 4.54     | 0       | 2.47  | 1.40E-11 |
| RP11-234E | ENSG00000 | 8.89     | 0.13    | 3.13  | 1.50E-41 |
| TRIL      | ENSG00000 | 5.99     | 0.65    | 2.083 | 1.57E-27 |
| ZNF486    | ENSG00000 | 21.7     | 1.18    | 3.38  | 4.62E-46 |
| RP11-771K | ENSG00000 | 6.66     | 0.12    | 2.774 | 1.54E-36 |
| RPL41P2   | ENSG00000 | 49.101   | 8.86    | 2.345 | 8.11E-37 |
| SNRPEP2   | ENSG00000 | 13.13    | 2.24    | 2.125 | 9.39E-44 |
| RP11-320N | ENSG00000 | 7.83     | 0.12    | 2.979 | 4.53E-27 |
| RP11-611C | ENSG00000 | 9        | 1.23    | 2.165 | 5.41E-27 |
| RP11-1143 | ENSG00000 | 15.33    | 0.54    | 3.407 | 5.39E-20 |
| RP11-386G | ENSG00000 | 433.262  | 78.498  | 2.45  | 1.48E-33 |
| RP11-161H | ENSG00000 | 508.462  | 24.06   | 4.346 | 2.21E-86 |
| RP11-316M | ENSG00000 | 10.79    | 0.31    | 3.17  | 1.68E-27 |
| RP11-345J | ENSG00000 | 11.5     | 0       | 3.644 | 6.17E-14 |
| MMP12     | ENSG00000 | 7.32     | 0.06    | 2.972 | 6.54E-29 |
| RP11-667K | ENSG00000 | 11.2     | 0       | 3.609 | 1.06E-37 |
| RP11-294J | ENSG00000 | 4.76     | 0.07    | 2.428 | 2.03E-17 |
| RP11-473I | ENSG00000 | 3.21     | 0       | 2.074 | 2.36E-25 |
| RP11-334E | ENSG00000 | 40.109   | 3.13    | 3.315 | 6.76E-34 |
| SNRPGP2   | ENSG00000 | 19.16    | 3.17    | 2.273 | 1.26E-47 |
| ESRG      | ENSG00000 | 16.5     | 0.04    | 4.073 | 6.77E-36 |
| RP3-461F1 | ENSG00000 | 70.992   | 5.92    | 3.379 | 1.66E-51 |
| RP11-442H | ENSG00000 | 4.66     | 0       | 2.501 | 2.69E-35 |
| RP5-940J5 | ENSG00000 | 12.66    | 0       | 3.772 | 8.71E-16 |
| IGHV3-30  | ENSG00000 | 139.342  | 0.18    | 6.894 | 8.29E-47 |
| IGHV2-70  | ENSG00000 | 6.42     | 0       | 2.891 | 9.76E-22 |
| RP11-457L | ENSG00000 | 3.7      | 0       | 2.233 | 1.19E-29 |
| HIST1H2BH | ENSG00000 | 6.86     | 0.91    | 2.041 | 1.68E-31 |
| RP11-843E | ENSG00000 | 12.98    | 0.6     | 3.127 | 5.43E-48 |
| TRAC      | ENSG00000 | 48.12    | 7.61    | 2.512 | 3.41E-30 |
| RP11-452N | ENSG00000 | 59.821   | 4.79    | 3.393 | 7.21E-64 |
| IGLV2-8   | ENSG00000 | 16.151   | 0.11    | 3.95  | 1.49E-32 |
| RPL41     | ENSG00000 | 5210.477 | 576.668 | 3.173 | 1.03E-68 |
| RP11-63A1 | ENSG00000 | 3.14     | 0       | 2.05  | 1.10E-26 |
| RP11-44N2 | ENSG00000 | 15.72    | 2.19    | 2.39  | 4.49E-15 |
| FKSG62    | ENSG00000 | 7.42     | 0.61    | 2.387 | 7.52E-21 |

|                    |        |      |       |          |
|--------------------|--------|------|-------|----------|
| IGHV1-69-ENSG00000 | 28.479 | 0    | 4.882 | 9.00E-29 |
| PCAT14 ENSG00000   | 98.23  | 2.26 | 4.928 | 1.33E-46 |
| RP3-467D1ENSG00000 | 16.14  | 0.49 | 3.524 | 6.77E-37 |

Table S2

| GSE3218 DOWN-DEGs |          |          |          |          |           |          |
|-------------------|----------|----------|----------|----------|-----------|----------|
|                   | logFC    | AveExpr  | t        | P.Value  | adj.P.Val | B        |
| SPACA1            | -4.44548 | 4.903485 | -63.5721 | 2.11E-87 | 2.63E-83  | 187.557  |
| LINC00588         | -3.1073  | 4.384861 | -45.8443 | 1.28E-72 | 7.95E-69  | 154.8825 |
| MSH4              | -3.21302 | 4.770274 | -40.8031 | 1.88E-67 | 7.80E-64  | 143.2616 |
| RNFT1             | -2.544   | 4.542406 | -39.2985 | 8.44E-66 | 2.62E-62  | 139.5308 |
| RIBC2             | -5.04245 | 5.395351 | -38.3125 | 1.09E-64 | 2.72E-61  | 137.0138 |
| KPNA5             | -4.81911 | 4.679376 | -37.6775 | 5.88E-64 | 1.22E-60  | 135.3616 |
| ZNF280B           | -4.39581 | 5.549718 | -36.159  | 3.61E-62 | 6.42E-59  | 131.3061 |
| DNAI2             | -4.06401 | 5.614811 | -35.3681 | 3.28E-61 | 5.09E-58  | 129.1332 |
| NACA2             | -3.81643 | 4.383538 | -34.6363 | 2.61E-60 | 3.61E-57  | 127.0843 |
| TTC40             | -3.92312 | 5.509752 | -34.4236 | 4.81E-60 | 5.98E-57  | 126.4817 |
| KANSL1L           | -4.43527 | 4.717224 | -33.896  | 2.22E-59 | 2.51E-56  | 124.9725 |
| MORC1             | -3.08911 | 4.193156 | -33.3484 | 1.11E-58 | 1.15E-55  | 123.3848 |
| GPR137            | -2.82508 | 7.313656 | -33.0217 | 2.92E-58 | 2.79E-55  | 122.4268 |
| ADAM18            | -3.98548 | 5.214746 | -32.7405 | 6.76E-58 | 5.91E-55  | 121.5957 |
| ADGB              | -3.21987 | 4.410419 | -32.7224 | 7.13E-58 | 5.91E-55  | 121.5418 |
| ADCY10            | -2.70537 | 5.055397 | -32.1941 | 3.52E-57 | 2.73E-54  | 119.9633 |
| MED7              | -3.23389 | 6.461817 | -31.5481 | 2.55E-56 | 1.87E-53  | 118.0027 |
| CCDC70            | -4.48016 | 5.407904 | -31.0036 | 1.39E-55 | 9.59E-53  | 116.3239 |
| SPO11             | -4.17085 | 4.591645 | -30.188  | 1.84E-54 | 1.14E-51  | 113.7633 |
| RNF32             | -4.87349 | 4.453373 | -30.1465 | 2.10E-54 | 1.24E-51  | 113.6314 |
| C11orf63          | -5.19056 | 5.406154 | -30.0906 | 2.51E-54 | 1.42E-51  | 113.4536 |
| ADAM2             | -5.74122 | 4.701372 | -28.7236 | 2.19E-52 | 1.19E-49  | 109.0206 |
| PAPOLB            | -2.95192 | 4.772263 | -28.5034 | 4.57E-52 | 2.11E-49  | 108.2906 |
| LINC00837         | -4.51853 | 4.676481 | -28.4344 | 5.76E-52 | 2.56E-49  | 108.0612 |
| BTG4              | -3.96117 | 5.408784 | -28.3957 | 6.56E-52 | 2.81E-49  | 107.9322 |
| DPY19L1P1         | -2.43667 | 4.866006 | -28.2937 | 9.25E-52 | 3.83E-49  | 107.5913 |
| LDHAL6B           | -6.25625 | 4.851723 | -27.906  | 3.44E-51 | 1.38E-48  | 106.288  |
| SCIN              | -2.60803 | 5.244489 | -27.7927 | 5.06E-51 | 1.96E-48  | 105.9042 |
| TMEM57            | -2.89151 | 6.602747 | -27.6647 | 7.83E-51 | 2.92E-48  | 105.4695 |
| DNAJC28           | -3.20172 | 4.838708 | -27.6587 | 8.00E-51 | 2.92E-48  | 105.4488 |
| GLB1L             | -3.1458  | 7.424517 | -27.6224 | 9.06E-51 | 3.22E-48  | 105.3254 |
| CEP112            | -5.26742 | 5.437052 | -27.5766 | 1.06E-50 | 3.66E-48  | 105.1692 |
| ATXN3L            | -2.4586  | 4.871529 | -27.2724 | 3.03E-50 | 9.90E-48  | 104.1267 |
| RPGRIP1           | -3.83986 | 6.451213 | -27.0356 | 6.89E-50 | 2.20E-47  | 103.3092 |
| SYNGR4            | -3.93281 | 6.59106  | -26.8908 | 1.14E-49 | 3.55E-47  | 102.8067 |
| SMURF1            | -2.96126 | 6.349629 | -26.6074 | 3.09E-49 | 9.37E-47  | 101.8167 |
| SPATA1            | -2.27228 | 4.259151 | -26.5355 | 3.98E-49 | 1.15E-46  | 101.5644 |
| SOX30             | -4.07442 | 4.737431 | -26.3547 | 7.56E-49 | 2.09E-46  | 100.9271 |
| TEX12             | -2.61786 | 4.444907 | -26.1877 | 1.37E-48 | 3.70E-46  | 100.336  |
| CCDC88A           | -2.97618 | 5.313718 | -26.016  | 2.53E-48 | 6.69E-46  | 99.72518 |
| CYLC1             | -3.12021 | 5.611317 | -26.0092 | 2.59E-48 | 6.71E-46  | 99.70089 |
| DMC1              | -2.72598 | 5.335899 | -25.9801 | 2.88E-48 | 7.21E-46  | 99.59682 |
| ELAVL2            | -4.2131  | 4.947002 | -25.9778 | 2.90E-48 | 7.21E-46  | 99.58894 |
| UBQLN3            | -6.46465 | 5.609914 | -25.805  | 5.40E-48 | 1.32E-45  | 98.97014 |
| GRK4              | -4.62498 | 5.32801  | -25.5896 | 1.18E-47 | 2.82E-45  | 98.1948  |
| CCDC186           | -3.37378 | 5.581683 | -25.56   | 1.31E-47 | 3.08E-45  | 98.08806 |

|           |          |          |          |          |          |          |
|-----------|----------|----------|----------|----------|----------|----------|
| CYLC2     | -5.62813 | 5.317585 | -25.496  | 1.65E-47 | 3.81E-45 | 97.85654 |
| ERO1LB    | -3.91543 | 5.22661  | -25.4421 | 2.01E-47 | 4.55E-45 | 97.66114 |
| GAPDHS    | -6.05915 | 5.890437 | -25.258  | 3.94E-47 | 8.76E-45 | 96.99191 |
| AURKC     | -4.42936 | 6.281318 | -25.1705 | 5.44E-47 | 1.19E-44 | 96.67244 |
| GPC5      | -2.97527 | 4.681421 | -25.1141 | 6.69E-47 | 1.43E-44 | 96.46616 |
| CARF      | -3.55479 | 4.496776 | -25.0198 | 9.47E-47 | 1.96E-44 | 96.12052 |
| LINC00342 | -3.10688 | 5.233744 | -25.0149 | 9.64E-47 | 1.96E-44 | 96.10247 |
| SPATA31C  | -2.09378 | 4.479296 | -24.8488 | 1.78E-46 | 3.57E-44 | 95.49101 |
| C20orf195 | -4.76045 | 6.210539 | -24.7493 | 2.58E-46 | 5.08E-44 | 95.1237  |
| C6orf10   | -4.30046 | 5.337565 | -24.6724 | 3.43E-46 | 6.66E-44 | 94.83892 |
| IQCK      | -2.23668 | 5.711925 | -24.6096 | 4.33E-46 | 8.29E-44 | 94.60564 |
| CAMK4     | -2.90829 | 5.616801 | -24.484  | 6.93E-46 | 1.31E-43 | 94.13811 |
| ART3      | -6.07695 | 5.093963 | -24.457  | 7.67E-46 | 1.42E-43 | 94.03772 |
| RWDD2A    | -3.76499 | 5.750645 | -24.437  | 8.26E-46 | 1.51E-43 | 93.96303 |
| RFPL3S    | -5.30029 | 4.993432 | -24.4155 | 8.96E-46 | 1.61E-43 | 93.88245 |
| AKAP4     | -5.64016 | 5.561033 | -24.3917 | 9.79E-46 | 1.74E-43 | 93.79369 |
| CCHCR1    | -3.17602 | 6.75992  | -24.3496 | 1.15E-45 | 2.01E-43 | 93.63613 |
| IRGC      | -3.26893 | 5.467078 | -24.3203 | 1.28E-45 | 2.21E-43 | 93.52657 |
| TSSK2     | -2.82359 | 6.680229 | -24.1656 | 2.29E-45 | 3.91E-43 | 92.9455  |
| GK2       | -5.55196 | 6.164795 | -24.1301 | 2.62E-45 | 4.41E-43 | 92.81179 |
| NME8      | -3.15835 | 5.284334 | -24.095  | 3.00E-45 | 4.84E-43 | 92.6796  |
| CBLN1     | -3.69492 | 5.413333 | -24.0947 | 3.00E-45 | 4.84E-43 | 92.67847 |
| CCIN      | -3.72546 | 6.72889  | -24.0667 | 3.34E-45 | 5.32E-43 | 92.57295 |
| SLC25A21  | -2.03769 | 4.382415 | -24.0411 | 3.68E-45 | 5.79E-43 | 92.47608 |
| RTDR1     | -3.13796 | 5.975804 | -24.0127 | 4.09E-45 | 6.36E-43 | 92.36898 |
| USP2      | -2.14441 | 5.941551 | -23.9978 | 4.33E-45 | 6.65E-43 | 92.31242 |
| PPP1R2P9  | -4.06273 | 5.948684 | -23.9939 | 4.40E-45 | 6.67E-43 | 92.29794 |
| CEP97     | -2.00864 | 4.61567  | -23.9837 | 4.57E-45 | 6.84E-43 | 92.25938 |
| ADD3-AS1  | -3.69161 | 5.907659 | -23.9675 | 4.86E-45 | 7.19E-43 | 92.19802 |
| PRKAA1    | -2.60519 | 5.050583 | -23.9516 | 5.16E-45 | 7.55E-43 | 92.13779 |
| ALLC      | -3.71499 | 6.432565 | -23.8107 | 8.83E-45 | 1.28E-42 | 91.60299 |
| C16orf95  | -4.36665 | 6.589616 | -23.7072 | 1.31E-44 | 1.87E-42 | 91.20901 |
| TEX28     | -2.4173  | 5.569671 | -23.6704 | 1.51E-44 | 2.13E-42 | 91.06843 |
| MYT1L     | -2.70716 | 4.822134 | -23.6594 | 1.58E-44 | 2.20E-42 | 91.02648 |
| COIL      | -3.96323 | 7.193157 | -23.6558 | 1.60E-44 | 2.21E-42 | 91.01272 |
| CT62      | -4.26666 | 5.008402 | -23.6125 | 1.89E-44 | 2.58E-42 | 90.8471  |
| RFX2      | -2.81468 | 6.635986 | -23.566  | 2.25E-44 | 3.05E-42 | 90.66931 |
| PEX7      | -2.35802 | 6.041051 | -23.5381 | 2.51E-44 | 3.36E-42 | 90.56219 |
| MROH7     | -3.71827 | 6.685117 | -23.4768 | 3.18E-44 | 4.20E-42 | 90.32708 |
| PRPS1L1   | -4.64383 | 5.35119  | -23.4734 | 3.22E-44 | 4.21E-42 | 90.31392 |
| PMS2P8    | -2.90072 | 6.05224  | -23.4471 | 3.56E-44 | 4.61E-42 | 90.21288 |
| TNP2      | -2.18329 | 4.842645 | -23.4059 | 4.18E-44 | 5.35E-42 | 90.0545  |
| C9orf9    | -4.84798 | 5.996348 | -23.3693 | 4.81E-44 | 6.10E-42 | 89.91373 |
| PSORS1C1  | -3.955   | 5.372265 | -23.3357 | 5.48E-44 | 6.88E-42 | 89.78421 |
| GPR135    | -3.07794 | 5.474999 | -23.2752 | 6.93E-44 | 8.53E-42 | 89.5505  |
| RPGRI1L   | -3.51063 | 4.646984 | -23.153  | 1.11E-43 | 1.34E-41 | 89.07777 |
| HSPA1L    | -4.69626 | 6.602983 | -23.0408 | 1.72E-43 | 2.06E-41 | 88.64181 |
| TTLL7     | -3.06323 | 5.502694 | -22.8367 | 3.83E-43 | 4.45E-41 | 87.8458  |
| PMFBP1    | -3.03301 | 6.622311 | -22.7401 | 5.60E-43 | 6.45E-41 | 87.46707 |

|          |          |          |          |          |          |          |
|----------|----------|----------|----------|----------|----------|----------|
| ZBTB32   | -4.51284 | 5.473399 | -22.7236 | 5.97E-43 | 6.81E-41 | 87.40247 |
| LRRC36   | -3.4144  | 7.070416 | -22.6553 | 7.82E-43 | 8.76E-41 | 87.13396 |
| FBXO24   | -3.85728 | 5.451583 | -22.6421 | 8.24E-43 | 9.14E-41 | 87.08216 |
| NR2C2    | -2.16226 | 5.471445 | -22.4053 | 2.11E-42 | 2.32E-40 | 86.14658 |
| POM121L9 | -4.79384 | 5.919851 | -22.1992 | 4.79E-42 | 5.22E-40 | 85.3273  |
| AQP5     | -2.83193 | 5.746522 | -22.1547 | 5.72E-42 | 6.18E-40 | 85.14998 |
| ZC2HC1C  | -4.64194 | 6.03668  | -22.149  | 5.85E-42 | 6.27E-40 | 85.12696 |
| KDM4D    | -5.21727 | 5.474984 | -22.0874 | 7.49E-42 | 7.96E-40 | 84.88088 |
| ZNRF4    | -2.56907 | 7.632622 | -22.0723 | 7.96E-42 | 8.39E-40 | 84.82036 |
| ACRV1    | -4.67373 | 6.332774 | -22.0585 | 8.41E-42 | 8.79E-40 | 84.76517 |
| ZSCAN5A  | -2.93866 | 6.078625 | -22.0248 | 9.63E-42 | 9.98E-40 | 84.63026 |
| CTAGE1   | -2.92427 | 4.833459 | -22.0195 | 9.84E-42 | 1.01E-39 | 84.60906 |
| NOL4     | -2.85742 | 5.145032 | -21.9227 | 1.45E-41 | 1.48E-39 | 84.22032 |
| MMACHC   | -2.10501 | 6.665404 | -21.8971 | 1.61E-41 | 1.63E-39 | 84.1171  |
| LRRC48   | -2.97659 | 5.602891 | -21.8612 | 1.86E-41 | 1.87E-39 | 83.97296 |
| TSGA10   | -5.54265 | 5.462958 | -21.8112 | 2.28E-41 | 2.27E-39 | 83.77105 |
| RDH8     | -2.03304 | 5.765968 | -21.7826 | 2.56E-41 | 2.52E-39 | 83.65594 |
| CATSPERG | -3.73609 | 5.903981 | -21.7719 | 2.67E-41 | 2.61E-39 | 83.61271 |
| APH1B    | -4.74756 | 7.579104 | -21.6423 | 4.52E-41 | 4.39E-39 | 83.08842 |
| GRAMD1C  | -3.79388 | 4.910989 | -21.6264 | 4.82E-41 | 4.64E-39 | 83.0239  |
| SLCO3A1  | -3.13397 | 6.652041 | -21.533  | 7.05E-41 | 6.74E-39 | 82.64463 |
| SNX19    | -2.4474  | 7.198235 | -21.5193 | 7.46E-41 | 7.08E-39 | 82.58863 |
| MNS1     | -5.48179 | 5.755329 | -21.4808 | 8.72E-41 | 8.15E-39 | 82.432   |
| SYCP2    | -4.89675 | 4.654947 | -21.4706 | 9.09E-41 | 8.44E-39 | 82.39053 |
| VPRBP    | -2.6738  | 6.201826 | -21.4307 | 1.07E-40 | 9.86E-39 | 82.22776 |
| LRIT1    | -2.01514 | 5.268312 | -21.4224 | 1.11E-40 | 1.01E-38 | 82.19398 |
| CEP63    | -2.86534 | 6.144112 | -21.4191 | 1.12E-40 | 1.02E-38 | 82.18027 |
| HIRIP3   | -2.98443 | 7.372751 | -21.3912 | 1.26E-40 | 1.13E-38 | 82.0666  |
| PACRG    | -3.55782 | 5.819784 | -21.3701 | 1.37E-40 | 1.23E-38 | 81.98014 |
| ZCCHC14  | -2.44015 | 6.520705 | -21.3278 | 1.63E-40 | 1.45E-38 | 81.8073  |
| PPP3CC   | -2.24829 | 5.599471 | -21.2934 | 1.88E-40 | 1.65E-38 | 81.6663  |
| IZUMO4   | -5.06654 | 6.578573 | -21.2921 | 1.89E-40 | 1.65E-38 | 81.6613  |
| TEX15    | -2.74872 | 5.669456 | -21.2776 | 2.00E-40 | 1.74E-38 | 81.60183 |
| TULP2    | -3.58355 | 6.390667 | -21.2712 | 2.06E-40 | 1.78E-38 | 81.57537 |
| C16orf71 | -4.15956 | 6.546048 | -21.266  | 2.10E-40 | 1.79E-38 | 81.55429 |
| EFCAB6   | -3.01117 | 6.260419 | -21.2642 | 2.12E-40 | 1.79E-38 | 81.54671 |
| HCFC2    | -4.71786 | 6.337392 | -21.1709 | 3.11E-40 | 2.61E-38 | 81.16387 |
| PGK2     | -5.1248  | 5.852843 | -21.1426 | 3.49E-40 | 2.92E-38 | 81.04731 |
| HIF1AN   | -2.26126 | 7.529895 | -20.9762 | 6.95E-40 | 5.72E-38 | 80.36094 |
| ADAM5    | -2.1409  | 5.810096 | -20.973  | 7.04E-40 | 5.76E-38 | 80.34773 |
| WDR78    | -3.99646 | 5.599738 | -20.9524 | 7.67E-40 | 6.16E-38 | 80.26249 |
| NGLY1    | -2.60322 | 7.141346 | -20.9517 | 7.69E-40 | 6.16E-38 | 80.25962 |
| PRKACG   | -3.08104 | 6.511578 | -20.9505 | 7.73E-40 | 6.16E-38 | 80.25502 |
| TDRD1    | -2.31491 | 5.436178 | -20.9476 | 7.82E-40 | 6.20E-38 | 80.24284 |
| TRIM52   | -2.49783 | 6.059618 | -20.9287 | 8.46E-40 | 6.66E-38 | 80.16474 |
| PDHA2    | -5.34269 | 6.529259 | -20.9034 | 9.40E-40 | 7.35E-38 | 80.05976 |
| MTRF1    | -2.68306 | 6.005864 | -20.8822 | 1.03E-39 | 7.98E-38 | 79.97191 |
| CLPB     | -4.91359 | 6.721433 | -20.8752 | 1.06E-39 | 8.16E-38 | 79.94302 |
| ANKMY1   | -2.4397  | 5.70584  | -20.7904 | 1.50E-39 | 1.15E-37 | 79.5908  |

|          |          |          |          |          |          |          |
|----------|----------|----------|----------|----------|----------|----------|
| DDX25    | -5.62386 | 6.005658 | -20.7702 | 1.64E-39 | 1.25E-37 | 79.50671 |
| ADAM30   | -3.37912 | 6.24354  | -20.7452 | 1.82E-39 | 1.38E-37 | 79.40267 |
| CCNE2    | -3.13497 | 5.408522 | -20.6913 | 2.27E-39 | 1.71E-37 | 79.17815 |
| ACTL7B   | -4.75564 | 5.874317 | -20.649  | 2.71E-39 | 2.03E-37 | 79.00166 |
| TAF7L    | -4.906   | 5.295409 | -20.6066 | 3.24E-39 | 2.41E-37 | 78.82475 |
| SSX3     | -2.91095 | 6.464464 | -20.6039 | 3.28E-39 | 2.42E-37 | 78.81339 |
| PDE3B    | -2.15636 | 5.878595 | -20.5822 | 3.59E-39 | 2.64E-37 | 78.72259 |
| CETN1    | -3.27347 | 7.628004 | -20.5513 | 4.09E-39 | 2.99E-37 | 78.59331 |
| RAB27B   | -2.05937 | 4.62696  | -20.5248 | 4.57E-39 | 3.32E-37 | 78.48206 |
| ZCWPW1   | -2.94012 | 7.569064 | -20.4995 | 5.08E-39 | 3.67E-37 | 78.3762  |
| LRP2BP   | -3.09561 | 5.689201 | -20.4335 | 6.70E-39 | 4.79E-37 | 78.09923 |
| SLC25A31 | -6.10738 | 4.533061 | -20.4179 | 7.16E-39 | 5.09E-37 | 78.0335  |
| LECT2    | -2.88807 | 5.154946 | -20.379  | 8.43E-39 | 5.96E-37 | 77.87013 |
| ARHGAP35 | -2.19242 | 6.548975 | -20.3346 | 1.02E-38 | 7.14E-37 | 77.68295 |
| TCP11    | -6.45698 | 6.802799 | -20.1237 | 2.48E-38 | 1.70E-36 | 76.79183 |
| AHI1     | -2.32323 | 6.074999 | -20.1196 | 2.53E-38 | 1.72E-36 | 76.77414 |
| ACR      | -3.09815 | 7.253251 | -20.1055 | 2.68E-38 | 1.81E-36 | 76.71459 |
| GK3P     | -3.13301 | 5.413924 | -20.0994 | 2.75E-38 | 1.85E-36 | 76.68836 |
| OXCT2    | -3.26288 | 7.173753 | -20.0908 | 2.86E-38 | 1.91E-36 | 76.65221 |
| STAM2    | -2.42203 | 5.882331 | -20.0672 | 3.16E-38 | 2.10E-36 | 76.5518  |
| SAP30L   | -2.97433 | 5.917729 | -19.9841 | 4.50E-38 | 2.97E-36 | 76.19852 |
| CAPN11   | -2.93016 | 5.659523 | -19.9549 | 5.09E-38 | 3.35E-36 | 76.07431 |
| ZKSCAN4  | -2.72765 | 6.884998 | -19.8605 | 7.63E-38 | 4.99E-36 | 75.67124 |
| TRAPPC12 | -3.44376 | 8.009997 | -19.8385 | 8.38E-38 | 5.46E-36 | 75.57729 |
| CST8     | -2.61667 | 6.676876 | -19.8015 | 9.82E-38 | 6.36E-36 | 75.41907 |
| CCDC7    | -3.66144 | 6.851342 | -19.7985 | 9.95E-38 | 6.41E-36 | 75.406   |
| MCF2     | -2.40565 | 5.018214 | -19.7412 | 1.27E-37 | 8.15E-36 | 75.16079 |
| CLIP4    | -3.36565 | 6.112735 | -19.6594 | 1.81E-37 | 1.15E-35 | 74.80961 |
| DOC2A    | -2.24336 | 6.186493 | -19.6342 | 2.02E-37 | 1.27E-35 | 74.70107 |
| HHIPL2   | -3.1402  | 6.214085 | -19.6303 | 2.05E-37 | 1.29E-35 | 74.68424 |
| LOC81691 | -6.70903 | 6.574109 | -19.6094 | 2.24E-37 | 1.40E-35 | 74.59442 |
| ST7L     | -2.12182 | 6.614836 | -19.5995 | 2.34E-37 | 1.45E-35 | 74.55197 |
| CCDC15   | -3.21546 | 6.30373  | -19.5945 | 2.39E-37 | 1.48E-35 | 74.53044 |
| GDF9     | -2.01047 | 6.532865 | -19.491  | 3.74E-37 | 2.29E-35 | 74.08399 |
| SLC1A6   | -3.39819 | 6.384219 | -19.4447 | 4.57E-37 | 2.78E-35 | 73.88387 |
| NAT6     | -2.57657 | 7.373531 | -19.4217 | 5.05E-37 | 3.05E-35 | 73.78446 |
| PIWIL1   | -5.94114 | 4.886973 | -19.3892 | 5.81E-37 | 3.49E-35 | 73.64355 |
| CDADC1   | -2.02201 | 5.545865 | -19.3482 | 6.94E-37 | 4.15E-35 | 73.46588 |
| AP1AR    | -2.11002 | 5.360355 | -19.3215 | 7.80E-37 | 4.64E-35 | 73.34997 |
| LYZL6    | -3.27856 | 6.464771 | -19.3147 | 8.03E-37 | 4.76E-35 | 73.32024 |
| C17orf80 | -3.12746 | 6.010081 | -19.3095 | 8.21E-37 | 4.82E-35 | 73.29807 |
| SSX1     | -2.53784 | 5.435691 | -19.3094 | 8.22E-37 | 4.82E-35 | 73.29753 |
| SOCS7    | -3.83476 | 6.681913 | -19.2385 | 1.12E-36 | 6.53E-35 | 72.9894  |
| SPATA6   | -5.7972  | 6.095342 | -19.2231 | 1.20E-36 | 6.95E-35 | 72.92235 |
| KIF3A    | -3.73063 | 5.855571 | -19.2195 | 1.22E-36 | 7.03E-35 | 72.90665 |
| AFF4     | -3.89506 | 5.555483 | -19.2159 | 1.23E-36 | 7.11E-35 | 72.89102 |
| HSPA4L   | -6.34665 | 5.290574 | -19.1988 | 1.33E-36 | 7.61E-35 | 72.81629 |
| HOOK1    | -4.06726 | 5.907237 | -19.1982 | 1.33E-36 | 7.61E-35 | 72.81388 |
| ZNF821   | -2.08499 | 7.075546 | -19.1892 | 1.39E-36 | 7.88E-35 | 72.77447 |



|          |          |          |          |          |          |          |
|----------|----------|----------|----------|----------|----------|----------|
| SPATA7   | -4.34355 | 5.339507 | -19.161  | 1.57E-36 | 8.87E-35 | 72.65176 |
| TRAF6    | -2.13488 | 7.065783 | -19.1026 | 2.03E-36 | 1.14E-34 | 72.39692 |
| FNDC8    | -3.53598 | 6.134446 | -19.0955 | 2.09E-36 | 1.17E-34 | 72.36567 |
| IMPACT   | -3.01337 | 5.379108 | -19.0878 | 2.16E-36 | 1.20E-34 | 72.33201 |
| TBC1D12  | -2.98836 | 6.463825 | -19.0873 | 2.17E-36 | 1.20E-34 | 72.32993 |
| DKKL1    | -3.5153  | 6.853302 | -19.0866 | 2.17E-36 | 1.20E-34 | 72.32699 |
| ACE      | -2.68181 | 5.822512 | -19.0742 | 2.29E-36 | 1.26E-34 | 72.27274 |
| PHTF1    | -2.83412 | 6.517324 | -19.0717 | 2.32E-36 | 1.27E-34 | 72.26171 |
| MS4A5    | -3.56406 | 6.652623 | -19.0715 | 2.32E-36 | 1.27E-34 | 72.26061 |
| FAM114A2 | -2.06135 | 7.245951 | -19.0645 | 2.39E-36 | 1.30E-34 | 72.23036 |
| NR6A1    | -2.13301 | 6.929058 | -19.0151 | 2.97E-36 | 1.61E-34 | 72.01389 |
| TSKS     | -3.28321 | 6.019183 | -18.9699 | 3.62E-36 | 1.93E-34 | 71.81594 |
| KIAA0586 | -2.02498 | 6.867789 | -18.942  | 4.10E-36 | 2.18E-34 | 71.69356 |
| TTC26    | -2.43189 | 6.462369 | -18.9237 | 4.44E-36 | 2.35E-34 | 71.61309 |
| SYCP1    | -5.01619 | 5.275333 | -18.9015 | 4.89E-36 | 2.58E-34 | 71.51577 |
| YPEL1    | -5.43967 | 7.052433 | -18.8915 | 5.12E-36 | 2.68E-34 | 71.47151 |
| RGS7     | -3.0892  | 4.90557  | -18.8775 | 5.44E-36 | 2.84E-34 | 71.41009 |
| MMP28    | -2.75316 | 5.122302 | -18.8335 | 6.60E-36 | 3.41E-34 | 71.21636 |
| ROPN1B   | -6.57893 | 6.19667  | -18.7881 | 8.07E-36 | 4.14E-34 | 71.01643 |
| HIST1H1T | -2.07979 | 6.347137 | -18.7256 | 1.06E-35 | 5.40E-34 | 70.74064 |
| CHD5     | -2.64506 | 6.135964 | -18.7153 | 1.11E-35 | 5.62E-34 | 70.69516 |
| TEX40    | -4.8607  | 7.415822 | -18.7051 | 1.16E-35 | 5.86E-34 | 70.65025 |
| LYRM2    | -2.88423 | 5.245027 | -18.6428 | 1.53E-35 | 7.67E-34 | 70.37463 |
| IFT74    | -2.92762 | 4.74336  | -18.6424 | 1.54E-35 | 7.67E-34 | 70.3728  |
| LDHC     | -6.47991 | 6.818314 | -18.6221 | 1.68E-35 | 8.36E-34 | 70.2828  |
| TTC12    | -2.50962 | 6.014209 | -18.5794 | 2.03E-35 | 1.01E-33 | 70.09368 |
| DNAH17   | -3.27493 | 6.247792 | -18.4887 | 3.04E-35 | 1.50E-33 | 69.69096 |
| CTNNA3   | -2.08267 | 6.369727 | -18.4615 | 3.43E-35 | 1.69E-33 | 69.56973 |
| ZBBX     | -4.99773 | 4.967885 | -18.448  | 3.65E-35 | 1.78E-33 | 69.50967 |
| CRY1     | -3.5378  | 6.236502 | -18.424  | 4.06E-35 | 1.98E-33 | 69.40283 |
| ZBTB48   | -2.50502 | 6.265141 | -18.3922 | 4.68E-35 | 2.27E-33 | 69.26098 |
| TRIM66   | -2.21436 | 6.983239 | -18.3648 | 5.28E-35 | 2.56E-33 | 69.13909 |
| SHCBP1L  | -4.62607 | 6.331808 | -18.3423 | 5.84E-35 | 2.82E-33 | 69.03846 |
| BCAP29   | -3.40054 | 5.445287 | -18.3284 | 6.22E-35 | 2.98E-33 | 68.97636 |
| CRISP2   | -7.78247 | 5.312297 | -18.2962 | 7.18E-35 | 3.42E-33 | 68.83251 |
| FSCN3    | -3.54228 | 7.865052 | -18.1494 | 1.39E-34 | 6.53E-33 | 68.17459 |
| UTRN     | -3.6359  | 6.723664 | -18.1323 | 1.50E-34 | 7.03E-33 | 68.09809 |
| PIGV     | -3.27327 | 6.992987 | -18.1303 | 1.51E-34 | 7.07E-33 | 68.08873 |
| BBS4     | -2.37827 | 6.227007 | -18.1093 | 1.66E-34 | 7.74E-33 | 67.99436 |
| C1orf105 | -3.71634 | 7.175392 | -18.1047 | 1.70E-34 | 7.86E-33 | 67.9738  |
| PRSS21   | -4.71029 | 6.078814 | -18.0712 | 1.97E-34 | 9.02E-33 | 67.82317 |
| RORA     | -3.232   | 5.492277 | -18.0711 | 1.97E-34 | 9.02E-33 | 67.82254 |
| RAD17    | -3.04312 | 7.795615 | -18.0697 | 1.99E-34 | 9.04E-33 | 67.81659 |
| SPTBN2   | -2.85942 | 6.273518 | -18.0432 | 2.24E-34 | 1.02E-32 | 67.69722 |
| SLC25A28 | -2.26038 | 7.743847 | -18.0043 | 2.67E-34 | 1.21E-32 | 67.52196 |
| ACSBG2   | -5.36397 | 6.622906 | -17.9815 | 2.96E-34 | 1.33E-32 | 67.41901 |
| ZMYND10  | -4.10889 | 6.472051 | -17.9783 | 3.00E-34 | 1.35E-32 | 67.40455 |
| ACTL7A   | -3.25778 | 7.635329 | -17.9586 | 3.28E-34 | 1.47E-32 | 67.3155  |
| IL13     | -2.7539  | 6.468923 | -17.9401 | 3.56E-34 | 1.59E-32 | 67.23232 |

|           |          |          |          |          |          |          |
|-----------|----------|----------|----------|----------|----------|----------|
| IFT88     | -4.78033 | 7.147302 | -17.9202 | 3.90E-34 | 1.73E-32 | 67.14228 |
| RAB11FIP5 | -3.40293 | 7.738513 | -17.9099 | 4.09E-34 | 1.80E-32 | 67.09561 |
| SLC12A6   | -3.42201 | 6.193337 | -17.8865 | 4.54E-34 | 2.00E-32 | 66.98975 |
| TCP10     | -2.39299 | 5.84492  | -17.8805 | 4.67E-34 | 2.04E-32 | 66.96255 |
| HSF2BP    | -3.05633 | 6.521347 | -17.8706 | 4.88E-34 | 2.12E-32 | 66.91794 |
| AGBL2     | -3.71088 | 5.316701 | -17.8378 | 5.66E-34 | 2.45E-32 | 66.76939 |
| ZNF473    | -3.19543 | 6.971105 | -17.8316 | 5.82E-34 | 2.51E-32 | 66.74133 |
| MAPRE3    | -2.65798 | 6.104375 | -17.7965 | 6.83E-34 | 2.93E-32 | 66.58205 |
| DYRK3     | -3.00204 | 7.483993 | -17.7806 | 7.34E-34 | 3.14E-32 | 66.50985 |
| MAK       | -2.87575 | 5.243223 | -17.77   | 7.70E-34 | 3.28E-32 | 66.46204 |
| FER       | -2.19431 | 6.550682 | -17.7669 | 7.81E-34 | 3.32E-32 | 66.44772 |
| AHCTF1    | -3.53537 | 6.329533 | -17.7487 | 8.49E-34 | 3.58E-32 | 66.36511 |
| RSF1      | -2.22909 | 5.271759 | -17.7198 | 9.68E-34 | 4.04E-32 | 66.23393 |
| CREM      | -3.30236 | 6.57426  | -17.7132 | 9.97E-34 | 4.15E-32 | 66.20395 |
| ELL3      | -3.6076  | 6.465172 | -17.6726 | 1.20E-33 | 4.97E-32 | 66.0191  |
| SFMBT1    | -4.06183 | 7.325838 | -17.6608 | 1.27E-33 | 5.23E-32 | 65.96554 |
| TP73-AS1  | -2.0538  | 6.310394 | -17.6411 | 1.39E-33 | 5.68E-32 | 65.87564 |
| ZPBP      | -6.13428 | 6.424679 | -17.5748 | 1.87E-33 | 7.64E-32 | 65.57373 |
| USP32     | -3.642   | 6.58684  | -17.5692 | 1.92E-33 | 7.81E-32 | 65.548   |
| SMG7-AS1  | -2.06089 | 5.049594 | -17.5516 | 2.08E-33 | 8.44E-32 | 65.46749 |
| BBIP1     | -3.31256 | 6.667482 | -17.5213 | 2.39E-33 | 9.63E-32 | 65.32923 |
| BRD8      | -3.70348 | 7.28371  | -17.5167 | 2.44E-33 | 9.80E-32 | 65.30814 |
| CBL       | -2.52274 | 6.401748 | -17.4443 | 3.41E-33 | 1.36E-31 | 64.9767  |
| SFT2D2    | -2.4652  | 7.46571  | -17.4374 | 3.52E-33 | 1.40E-31 | 64.94513 |
| KIF2A     | -3.14941 | 6.868574 | -17.3863 | 4.44E-33 | 1.75E-31 | 64.71084 |
| RBMXL2    | -2.87591 | 5.611531 | -17.3832 | 4.51E-33 | 1.77E-31 | 64.69685 |
| ODF1      | -5.55953 | 6.966183 | -17.3584 | 5.05E-33 | 1.98E-31 | 64.58284 |
| SOX5      | -3.4092  | 6.141112 | -17.3401 | 5.49E-33 | 2.14E-31 | 64.49893 |
| CHGA      | -4.67191 | 6.678828 | -17.3292 | 5.78E-33 | 2.24E-31 | 64.4486  |
| HYPM      | -2.84641 | 6.459213 | -17.3224 | 5.96E-33 | 2.31E-31 | 64.41769 |
| DRICH1    | -2.06917 | 6.508736 | -17.3187 | 6.06E-33 | 2.34E-31 | 64.40042 |
| ANKS1B    | -2.08319 | 4.947075 | -17.3097 | 6.32E-33 | 2.43E-31 | 64.35915 |
| ABCB9     | -2.37062 | 6.439843 | -17.3046 | 6.47E-33 | 2.48E-31 | 64.33573 |
| MAPKBP1   | -2.68833 | 7.657991 | -17.3028 | 6.52E-33 | 2.50E-31 | 64.32745 |
| CHKA      | -3.88811 | 7.490747 | -17.288  | 6.98E-33 | 2.66E-31 | 64.2593  |
| CCT6B     | -5.53316 | 6.979407 | -17.2743 | 7.44E-33 | 2.83E-31 | 64.19628 |
| TEX30     | -4.56658 | 7.215136 | -17.2358 | 8.88E-33 | 3.36E-31 | 64.01913 |
| PCSK2     | -2.26273 | 5.020782 | -17.2115 | 9.93E-33 | 3.74E-31 | 63.90714 |
| ALDH1A2   | -2.14024 | 6.2443   | -17.211  | 9.96E-33 | 3.74E-31 | 63.90499 |
| ANKRD7    | -7.97415 | 5.179087 | -17.1941 | 1.08E-32 | 4.03E-31 | 63.8267  |
| CLTCL1    | -2.84506 | 7.346788 | -17.123  | 1.49E-32 | 5.58E-31 | 63.49876 |
| SMPD2     | -2.53185 | 7.381775 | -17.1137 | 1.56E-32 | 5.81E-31 | 63.45549 |
| CCNO      | -2.63189 | 6.177703 | -17.1077 | 1.60E-32 | 5.96E-31 | 63.42792 |
| INTS6     | -3.98381 | 6.359287 | -17.0637 | 1.97E-32 | 7.26E-31 | 63.22455 |
| SPANXB1   | -2.43496 | 4.837606 | -17.056  | 2.04E-32 | 7.50E-31 | 63.1886  |
| TEX14     | -5.42972 | 5.914249 | -17.055  | 2.05E-32 | 7.51E-31 | 63.18407 |
| MAGEC1    | -3.57113 | 5.848646 | -17.0514 | 2.08E-32 | 7.61E-31 | 63.16757 |
| FAM188A   | -2.39659 | 6.561369 | -17.0316 | 2.28E-32 | 8.30E-31 | 63.07581 |
| BAP1      | -2.1625  | 8.763247 | -17.0268 | 2.33E-32 | 8.46E-31 | 63.05352 |

|          |          |          |          |          |          |          |
|----------|----------|----------|----------|----------|----------|----------|
| FGFR1OP  | -2.22917 | 6.791986 | -17.0204 | 2.40E-32 | 8.69E-31 | 63.02376 |
| CDKL3    | -2.06379 | 5.912736 | -17.0149 | 2.47E-32 | 8.89E-31 | 62.99838 |
| SAMD4A   | -2.22786 | 6.063249 | -17.0045 | 2.59E-32 | 9.27E-31 | 62.95008 |
| CASC1    | -4.35012 | 4.944115 | -16.9952 | 2.70E-32 | 9.66E-31 | 62.90693 |
| NR3C2    | -3.04408 | 5.119696 | -16.9688 | 3.06E-32 | 1.08E-30 | 62.78432 |
| CCNA1    | -4.99205 | 6.690814 | -16.9586 | 3.20E-32 | 1.13E-30 | 62.73734 |
| PHF1     | -2.19297 | 8.540085 | -16.9551 | 3.26E-32 | 1.15E-30 | 62.72114 |
| PRM2     | -7.68646 | 6.45826  | -16.9414 | 3.47E-32 | 1.22E-30 | 62.65721 |
| TTBK2    | -2.47386 | 4.773441 | -16.9124 | 3.97E-32 | 1.38E-30 | 62.52266 |
| ARHGAP28 | -3.46191 | 5.833065 | -16.8529 | 5.24E-32 | 1.81E-30 | 62.24561 |
| MTL5     | -4.23279 | 6.248373 | -16.8466 | 5.39E-32 | 1.85E-30 | 62.21634 |
| TSSK1B   | -3.016   | 5.362889 | -16.8056 | 6.53E-32 | 2.24E-30 | 62.02524 |
| HRASLS   | -5.3433  | 5.878191 | -16.7812 | 7.32E-32 | 2.49E-30 | 61.91187 |
| PRM1     | -8.37738 | 6.395203 | -16.7504 | 8.45E-32 | 2.87E-30 | 61.76795 |
| SLC6A16  | -5.07203 | 6.764617 | -16.7341 | 9.12E-32 | 3.09E-30 | 61.69193 |
| ODF2     | -5.45865 | 6.85742  | -16.7223 | 9.64E-32 | 3.26E-30 | 61.63667 |
| STAG3    | -4.33365 | 7.032465 | -16.7129 | 1.01E-31 | 3.39E-30 | 61.59272 |
| PPFIA1   | -2.40023 | 7.042715 | -16.71   | 1.02E-31 | 3.43E-30 | 61.57902 |
| SPA17    | -5.92999 | 6.301503 | -16.7071 | 1.03E-31 | 3.47E-30 | 61.56585 |
| C2orf42  | -3.41933 | 7.488007 | -16.695  | 1.09E-31 | 3.66E-30 | 61.50909 |
| FKBP6    | -2.8551  | 7.186265 | -16.6898 | 1.12E-31 | 3.74E-30 | 61.48472 |
| GSG1     | -5.8506  | 5.465694 | -16.6766 | 1.19E-31 | 3.97E-30 | 61.42296 |
| SAYSD1   | -2.73941 | 7.34008  | -16.6646 | 1.26E-31 | 4.17E-30 | 61.36676 |
| RNF19A   | -2.69613 | 5.932377 | -16.664  | 1.27E-31 | 4.17E-30 | 61.3642  |
| MAP9     | -2.21441 | 4.818482 | -16.6322 | 1.47E-31 | 4.82E-30 | 61.21542 |
| FRMPD1   | -2.71415 | 5.819398 | -16.6247 | 1.52E-31 | 4.98E-30 | 61.17995 |
| GSTA3    | -2.81342 | 6.453538 | -16.6166 | 1.58E-31 | 5.16E-30 | 61.14234 |
| SLC2A5   | -3.12027 | 7.020215 | -16.6124 | 1.61E-31 | 5.25E-30 | 61.12242 |
| TEX13A   | -2.30016 | 5.88654  | -16.593  | 1.77E-31 | 5.73E-30 | 61.03139 |
| SMCP     | -4.52446 | 7.90725  | -16.588  | 1.81E-31 | 5.85E-30 | 61.00816 |
| C10orf88 | -2.68133 | 5.871318 | -16.5821 | 1.86E-31 | 6.00E-30 | 60.98041 |
| LY6G5C   | -2.06699 | 5.898081 | -16.5376 | 2.29E-31 | 7.34E-30 | 60.77164 |
| DLEU2    | -2.36618 | 5.83982  | -16.5246 | 2.43E-31 | 7.78E-30 | 60.71042 |
| HPS5     | -3.34033 | 6.095764 | -16.5099 | 2.61E-31 | 8.29E-30 | 60.64145 |
| KIAA0556 | -2.22031 | 7.39799  | -16.5029 | 2.70E-31 | 8.55E-30 | 60.60844 |
| TTC30A   | -2.76023 | 4.508603 | -16.4912 | 2.85E-31 | 9.01E-30 | 60.55345 |
| NUP62CL  | -3.21881 | 5.094364 | -16.4545 | 3.39E-31 | 1.07E-29 | 60.38096 |
| C1QTNF9B | -2.40625 | 6.853172 | -16.4431 | 3.57E-31 | 1.12E-29 | 60.32713 |
| PHF7     | -4.75428 | 6.627081 | -16.4138 | 4.10E-31 | 1.28E-29 | 60.18944 |
| RPL10L   | -3.43346 | 6.969336 | -16.3983 | 4.41E-31 | 1.36E-29 | 60.11645 |
| LRP8     | -3.74917 | 6.374441 | -16.3915 | 4.56E-31 | 1.40E-29 | 60.08411 |
| ZNHIT2   | -2.21994 | 6.406333 | -16.3832 | 4.74E-31 | 1.45E-29 | 60.04531 |
| DAK      | -2.12714 | 6.257958 | -16.3776 | 4.86E-31 | 1.49E-29 | 60.01859 |
| NDUFAF3  | -3.48947 | 8.572338 | -16.3661 | 5.14E-31 | 1.57E-29 | 59.96451 |
| PCYT2    | -4.10188 | 7.431033 | -16.3653 | 5.15E-31 | 1.57E-29 | 59.96075 |
| SPAG1    | -2.76861 | 4.857447 | -16.3465 | 5.63E-31 | 1.70E-29 | 59.87195 |
| SPEF1    | -2.59171 | 5.893128 | -16.3219 | 6.33E-31 | 1.91E-29 | 59.75576 |
| PHLPP2   | -2.00205 | 7.293582 | -16.3005 | 7.00E-31 | 2.10E-29 | 59.65475 |
| CRAT     | -3.0599  | 7.747921 | -16.2798 | 7.72E-31 | 2.31E-29 | 59.55721 |

|          |          |          |          |          |          |          |
|----------|----------|----------|----------|----------|----------|----------|
| INHA     | -5.00264 | 6.570891 | -16.2423 | 9.22E-31 | 2.74E-29 | 59.37977 |
| CUL3     | -2.41075 | 6.477567 | -16.2204 | 1.02E-30 | 3.03E-29 | 59.27592 |
| RNF17    | -2.5383  | 5.754407 | -16.1871 | 1.20E-30 | 3.54E-29 | 59.11807 |
| SUPT3H   | -2.29209 | 6.603764 | -16.1694 | 1.30E-30 | 3.83E-29 | 59.03452 |
| TBCCD1   | -2.81907 | 5.909432 | -16.1632 | 1.34E-30 | 3.93E-29 | 59.0048  |
| DUSP13   | -2.8607  | 6.76595  | -16.1386 | 1.51E-30 | 4.38E-29 | 58.88839 |
| CLGN     | -5.29002 | 4.912932 | -16.1337 | 1.54E-30 | 4.46E-29 | 58.86475 |
| OAZ3     | -3.15665 | 5.649454 | -16.1169 | 1.67E-30 | 4.80E-29 | 58.7852  |
| TNP1     | -7.57496 | 6.563554 | -16.1152 | 1.68E-30 | 4.83E-29 | 58.77715 |
| ATG9A    | -2.43361 | 8.060869 | -16.06   | 2.19E-30 | 6.20E-29 | 58.515   |
| LIN7A    | -2.68906 | 5.662861 | -16.0597 | 2.19E-30 | 6.20E-29 | 58.51355 |
| YBX2     | -4.69256 | 8.102006 | -16.0578 | 2.21E-30 | 6.24E-29 | 58.50453 |
| SPAG9    | -2.54869 | 6.455743 | -16.044  | 2.36E-30 | 6.65E-29 | 58.43886 |
| GPN3     | -2.6681  | 7.252744 | -16.0148 | 2.72E-30 | 7.57E-29 | 58.29977 |
| DDX4     | -6.29448 | 5.450864 | -16.0127 | 2.74E-30 | 7.63E-29 | 58.28962 |
| ULK2     | -2.55788 | 6.661138 | -16.0041 | 2.86E-30 | 7.93E-29 | 58.2489  |
| SNAPC3   | -2.10757 | 5.92063  | -15.9903 | 3.05E-30 | 8.45E-29 | 58.18317 |
| UIMC1    | -3.10848 | 7.823505 | -15.9802 | 3.20E-30 | 8.85E-29 | 58.13489 |
| ZNF165   | -4.57015 | 5.30425  | -15.9686 | 3.39E-30 | 9.31E-29 | 58.07989 |
| DNAI1    | -3.35738 | 6.512497 | -15.9671 | 3.41E-30 | 9.36E-29 | 58.0727  |
| AK6      | -2.29481 | 7.314851 | -15.9612 | 3.51E-30 | 9.60E-29 | 58.04454 |
| HMG5     | -3.11949 | 5.614694 | -15.933  | 4.01E-30 | 1.09E-28 | 57.91006 |
| CEP350   | -2.46945 | 7.724332 | -15.921  | 4.25E-30 | 1.15E-28 | 57.85284 |
| VCX2     | -4.26634 | 6.380686 | -15.9073 | 4.54E-30 | 1.22E-28 | 57.78733 |
| BAG1     | -2.61597 | 8.137353 | -15.8393 | 6.28E-30 | 1.68E-28 | 57.46228 |
| IGLL1    | -2.23291 | 5.825614 | -15.8391 | 6.28E-30 | 1.68E-28 | 57.46158 |
| TSNAXIP1 | -2.39987 | 7.599606 | -15.7968 | 7.69E-30 | 2.04E-28 | 57.25928 |
| IQCE     | -2.7493  | 6.143108 | -15.7904 | 7.94E-30 | 2.10E-28 | 57.22826 |
| DXO      | -2.242   | 7.965519 | -15.7864 | 8.09E-30 | 2.13E-28 | 57.2094  |
| ADAM3A   | -2.49354 | 4.501968 | -15.7807 | 8.31E-30 | 2.19E-28 | 57.18198 |
| FRS3     | -2.4938  | 6.953835 | -15.7789 | 8.38E-30 | 2.20E-28 | 57.17356 |
| DNAH7    | -2.49251 | 6.141841 | -15.7544 | 9.43E-30 | 2.46E-28 | 57.05592 |
| SPAG6    | -4.93077 | 6.42241  | -15.734  | 1.04E-29 | 2.69E-28 | 56.95836 |
| PCM1     | -2.45519 | 7.67165  | -15.72   | 1.11E-29 | 2.87E-28 | 56.891   |
| PLEKHA1  | -3.421   | 6.97963  | -15.7181 | 1.12E-29 | 2.90E-28 | 56.88189 |
| PPP1R7   | -2.35091 | 7.570857 | -15.6938 | 1.26E-29 | 3.23E-28 | 56.76549 |
| USP29    | -2.0753  | 6.48798  | -15.6568 | 1.51E-29 | 3.82E-28 | 56.58779 |
| CDKL2    | -2.04594 | 6.13561  | -15.6556 | 1.52E-29 | 3.83E-28 | 56.58168 |
| IPO13    | -2.03095 | 8.220629 | -15.6483 | 1.57E-29 | 3.96E-28 | 56.54658 |
| VRK3     | -2.33074 | 8.637323 | -15.6149 | 1.84E-29 | 4.63E-28 | 56.38624 |
| DZIP3    | -2.91236 | 6.559429 | -15.6129 | 1.86E-29 | 4.65E-28 | 56.37639 |
| LIN37    | -2.32415 | 5.106372 | -15.5918 | 2.06E-29 | 5.11E-28 | 56.27519 |
| SH3TC2   | -2.39562 | 5.793933 | -15.51   | 3.06E-29 | 7.54E-28 | 55.881   |
| ANKRD36B | -4.50681 | 5.576938 | -15.4772 | 3.58E-29 | 8.79E-28 | 55.72287 |
| POMZP3   | -3.75907 | 6.548461 | -15.4547 | 3.99E-29 | 9.77E-28 | 55.61395 |
| GIN1     | -2.20906 | 6.248881 | -15.4473 | 4.14E-29 | 1.01E-27 | 55.57862 |
| DFNB31   | -2.28422 | 6.718204 | -15.4234 | 4.64E-29 | 1.13E-27 | 55.46294 |
| RALGPS1  | -2.035   | 6.031755 | -15.3632 | 6.21E-29 | 1.50E-27 | 55.17174 |
| PHKG2    | -2.54389 | 7.951397 | -15.3408 | 6.93E-29 | 1.67E-27 | 55.06315 |

|          |          |          |          |          |          |          |
|----------|----------|----------|----------|----------|----------|----------|
| NRIP3    | -3.89519 | 7.289041 | -15.3239 | 7.52E-29 | 1.81E-27 | 54.98146 |
| CYB5R2   | -4.42279 | 7.226263 | -15.32   | 7.66E-29 | 1.84E-27 | 54.96266 |
| BRDT     | -5.20138 | 5.446948 | -15.3072 | 8.15E-29 | 1.95E-27 | 54.90064 |
| TOLLIP   | -2.32815 | 7.775172 | -15.3053 | 8.23E-29 | 1.96E-27 | 54.89123 |
| OR7E14P  | -2.87006 | 5.161762 | -15.2545 | 1.05E-28 | 2.49E-27 | 54.64506 |
| IFT140   | -2.3288  | 5.252471 | -15.2442 | 1.11E-28 | 2.61E-27 | 54.59497 |
| RSPH6A   | -2.35297 | 6.650737 | -15.2391 | 1.13E-28 | 2.66E-27 | 54.57027 |
| FAM169A  | -3.79983 | 5.366105 | -15.2347 | 1.16E-28 | 2.71E-27 | 54.5491  |
| TBL2     | -2.66798 | 7.477836 | -15.1991 | 1.38E-28 | 3.20E-27 | 54.37583 |
| EDC3     | -2.4565  | 6.555173 | -15.1926 | 1.42E-28 | 3.29E-27 | 54.34435 |
| MYBL1    | -4.11932 | 5.63578  | -15.1921 | 1.43E-28 | 3.29E-27 | 54.3421  |
| KIAA0895 | -3.6268  | 4.602207 | -15.1549 | 1.71E-28 | 3.93E-27 | 54.16104 |
| H2AFJ    | -2.39429 | 4.940761 | -15.1196 | 2.03E-28 | 4.63E-27 | 53.98921 |
| VAMP2    | -2.31765 | 7.115401 | -15.0429 | 2.95E-28 | 6.68E-27 | 53.61548 |
| PIBF1    | -2.73125 | 6.077351 | -15.0405 | 2.98E-28 | 6.74E-27 | 53.60366 |
| GID4     | -3.74372 | 6.900302 | -15.0184 | 3.32E-28 | 7.49E-27 | 53.49574 |
| ELF2     | -2.28881 | 7.372361 | -14.9985 | 3.66E-28 | 8.22E-27 | 53.39897 |
| ADORA1   | -2.16192 | 6.61663  | -14.9898 | 3.82E-28 | 8.56E-27 | 53.35651 |
| MTMR6    | -3.38604 | 6.41397  | -14.9821 | 3.97E-28 | 8.85E-27 | 53.31893 |
| B9D1     | -2.07831 | 6.347709 | -14.9741 | 4.13E-28 | 9.19E-27 | 53.2797  |
| CCDC181  | -4.2906  | 4.9927   | -14.9725 | 4.16E-28 | 9.25E-27 | 53.27178 |
| SPINK2   | -6.07512 | 6.938706 | -14.9711 | 4.19E-28 | 9.29E-27 | 53.26516 |
| RUNDC3B  | -2.82749 | 4.740195 | -14.9113 | 5.61E-28 | 1.24E-26 | 52.97277 |
| TLE4     | -2.22793 | 5.931339 | -14.9105 | 5.63E-28 | 1.24E-26 | 52.96869 |
| CNNM1    | -2.53486 | 6.642546 | -14.8833 | 6.43E-28 | 1.41E-26 | 52.83561 |
| C9orf116 | -2.7285  | 6.359496 | -14.8796 | 6.55E-28 | 1.43E-26 | 52.81726 |
| CNTRL    | -3.32685 | 7.183067 | -14.8723 | 6.79E-28 | 1.48E-26 | 52.78156 |
| MARK1    | -2.62442 | 6.129805 | -14.8701 | 6.87E-28 | 1.50E-26 | 52.77082 |
| KIF18A   | -2.97474 | 5.614303 | -14.8691 | 6.90E-28 | 1.50E-26 | 52.76609 |
| CTNNA2   | -3.89387 | 5.700915 | -14.8534 | 7.45E-28 | 1.61E-26 | 52.68927 |
| GAPVD1   | -2.26234 | 7.61799  | -14.8516 | 7.52E-28 | 1.62E-26 | 52.68002 |
| SLC30A4  | -2.21261 | 4.812768 | -14.85   | 7.58E-28 | 1.63E-26 | 52.67214 |
| SRPK2    | -2.30492 | 7.486576 | -14.8482 | 7.64E-28 | 1.64E-26 | 52.66356 |
| CDK20    | -2.01565 | 7.454926 | -14.825  | 8.56E-28 | 1.84E-26 | 52.54976 |
| FAAH     | -2.80665 | 6.852013 | -14.8202 | 8.77E-28 | 1.88E-26 | 52.52609 |
| PIP5K1C  | -2.10596 | 8.573517 | -14.8092 | 9.26E-28 | 1.98E-26 | 52.47224 |
| GEMIN4   | -2.39269 | 8.084962 | -14.8066 | 9.37E-28 | 2.00E-26 | 52.45954 |
| TP53TG5  | -2.94721 | 6.920037 | -14.8009 | 9.64E-28 | 2.05E-26 | 52.43179 |
| OBFC1    | -2.20575 | 7.588584 | -14.7988 | 9.74E-28 | 2.07E-26 | 52.42111 |
| BRAP     | -2.41107 | 6.817238 | -14.7968 | 9.84E-28 | 2.08E-26 | 52.41147 |
| CCNH     | -3.21127 | 8.379597 | -14.7944 | 9.95E-28 | 2.10E-26 | 52.39963 |
| NME5     | -5.18716 | 6.736024 | -14.7642 | 1.15E-27 | 2.44E-26 | 52.25156 |
| ATF7IP2  | -2.75505 | 7.783134 | -14.7436 | 1.28E-27 | 2.69E-26 | 52.15014 |
| SCAPER   | -2.27696 | 6.434705 | -14.7116 | 1.50E-27 | 3.12E-26 | 51.99296 |
| STX18    | -2.44155 | 8.238113 | -14.6725 | 1.81E-27 | 3.74E-26 | 51.80098 |
| CENPC    | -2.04031 | 6.678157 | -14.6407 | 2.12E-27 | 4.35E-26 | 51.64429 |
| PSMC3IP  | -2.16874 | 7.144019 | -14.6151 | 2.40E-27 | 4.91E-26 | 51.51829 |
| NDUFAF1  | -2.55394 | 7.461832 | -14.5764 | 2.91E-27 | 5.92E-26 | 51.32726 |
| AR       | -2.19704 | 5.697173 | -14.5037 | 4.17E-27 | 8.44E-26 | 50.96878 |

|         |          |          |          |          |          |          |
|---------|----------|----------|----------|----------|----------|----------|
| CABYR   | -5.6267  | 6.621019 | -14.5032 | 4.18E-27 | 8.45E-26 | 50.966   |
| RUFY3   | -2.10476 | 5.937532 | -14.4908 | 4.44E-27 | 8.94E-26 | 50.90465 |
| ZDHHC14 | -2.12996 | 7.59643  | -14.4637 | 5.08E-27 | 1.02E-25 | 50.7708  |
| AGFG1   | -2.01246 | 6.724473 | -14.4468 | 5.52E-27 | 1.10E-25 | 50.68707 |
| YEATS4  | -2.44318 | 5.633037 | -14.4442 | 5.59E-27 | 1.11E-25 | 50.67469 |
| CBLL1   | -2.09806 | 4.7374   | -14.4248 | 6.16E-27 | 1.22E-25 | 50.57847 |
| DPEP3   | -4.47074 | 6.069473 | -14.4154 | 6.45E-27 | 1.28E-25 | 50.53206 |
| GPS2    | -2.44056 | 8.364721 | -14.3807 | 7.66E-27 | 1.51E-25 | 50.36023 |
| ZNF415  | -2.58582 | 5.855167 | -14.3718 | 8.01E-27 | 1.58E-25 | 50.31593 |
| USPL1   | -2.52131 | 7.805907 | -14.3429 | 9.24E-27 | 1.82E-25 | 50.17304 |
| PPME1   | -2.12969 | 8.904824 | -14.3033 | 1.12E-26 | 2.20E-25 | 49.97646 |
| SLC30A3 | -2.49338 | 8.75094  | -14.2937 | 1.18E-26 | 2.30E-25 | 49.92866 |
| NR0B1   | -2.46325 | 5.433061 | -14.2805 | 1.26E-26 | 2.45E-25 | 49.86349 |
| UPF3A   | -2.23616 | 7.418565 | -14.245  | 1.50E-26 | 2.92E-25 | 49.68699 |
| AKAP11  | -2.47968 | 7.083172 | -14.2439 | 1.51E-26 | 2.93E-25 | 49.68169 |
| MPP6    | -3.37108 | 5.960802 | -14.1971 | 1.91E-26 | 3.66E-25 | 49.44883 |
| FAM53C  | -2.20111 | 8.383786 | -14.1815 | 2.06E-26 | 3.94E-25 | 49.37124 |
| PLSCR2  | -3.01875 | 5.677229 | -14.174  | 2.14E-26 | 4.08E-25 | 49.3338  |
| CSNK2A2 | -3.65623 | 8.076622 | -14.1525 | 2.38E-26 | 4.52E-25 | 49.22713 |
| TOPORS  | -2.17812 | 6.014314 | -14.1513 | 2.39E-26 | 4.54E-25 | 49.22115 |
| KLHL11  | -2.16582 | 7.067531 | -14.1475 | 2.44E-26 | 4.62E-25 | 49.20218 |
| DZIP1   | -3.24812 | 6.383238 | -14.1415 | 2.52E-26 | 4.75E-25 | 49.17221 |
| PIK3R3  | -3.12639 | 7.124495 | -14.1335 | 2.62E-26 | 4.93E-25 | 49.13234 |
| CUTC    | -3.1978  | 7.052847 | -14.0997 | 3.10E-26 | 5.79E-25 | 48.96406 |
| SIK3    | -2.1606  | 7.108875 | -14.0641 | 3.70E-26 | 6.86E-25 | 48.78626 |
| GAGE3   | -5.55329 | 6.761195 | -14.0495 | 3.98E-26 | 7.35E-25 | 48.71351 |
| PAOX    | -2.96454 | 6.866966 | -14.044  | 4.09E-26 | 7.54E-25 | 48.68627 |
| DIXDC1  | -3.20703 | 7.069851 | -14.0411 | 4.15E-26 | 7.64E-25 | 48.67191 |
| KIF5B   | -2.65986 | 8.322283 | -14.0264 | 4.47E-26 | 8.19E-25 | 48.59841 |
| RABIF   | -2.0965  | 7.457081 | -13.9934 | 5.27E-26 | 9.61E-25 | 48.43374 |
| DHX57   | -2.06569 | 6.14485  | -13.9925 | 5.29E-26 | 9.65E-25 | 48.42882 |
| CGRRF1  | -2.8089  | 7.158008 | -13.9883 | 5.40E-26 | 9.84E-25 | 48.40791 |
| ZDHHC13 | -2.59275 | 6.687047 | -13.9864 | 5.46E-26 | 9.92E-25 | 48.39838 |
| KCTD13  | -3.3202  | 7.418382 | -13.9719 | 5.86E-26 | 1.06E-24 | 48.32632 |
| ATG2B   | -2.30039 | 5.224871 | -13.9672 | 6.00E-26 | 1.08E-24 | 48.3028  |
| CCP110  | -3.06591 | 7.527872 | -13.9621 | 6.16E-26 | 1.11E-24 | 48.27712 |
| RNF14   | -2.99337 | 6.693867 | -13.9351 | 7.05E-26 | 1.26E-24 | 48.14212 |
| HAGH    | -2.4821  | 7.853889 | -13.925  | 7.42E-26 | 1.32E-24 | 48.09142 |
| AP4M1   | -2.14322 | 6.956269 | -13.8327 | 1.18E-25 | 2.08E-24 | 47.62961 |
| TTLL1   | -2.3454  | 6.611541 | -13.8322 | 1.18E-25 | 2.08E-24 | 47.62717 |
| PGAM2   | -3.46722 | 5.400421 | -13.8254 | 1.22E-25 | 2.15E-24 | 47.59292 |
| GRAMD1B | -2.28965 | 7.259998 | -13.7635 | 1.67E-25 | 2.90E-24 | 47.2826  |
| FHL5    | -2.29632 | 5.193174 | -13.7541 | 1.75E-25 | 3.04E-24 | 47.23495 |
| TMCC1   | -2.09236 | 6.496157 | -13.7227 | 2.05E-25 | 3.54E-24 | 47.07738 |
| LRRC49  | -3.27588 | 6.140506 | -13.6843 | 2.48E-25 | 4.27E-24 | 46.88463 |
| IK      | -2.15291 | 9.369106 | -13.6696 | 2.67E-25 | 4.58E-24 | 46.8107  |
| FUZ     | -2.17736 | 6.842258 | -13.668  | 2.69E-25 | 4.61E-24 | 46.80251 |
| SETX    | -2.33375 | 8.271714 | -13.6399 | 3.10E-25 | 5.29E-24 | 46.66115 |
| S1PR2   | -2.48464 | 5.810728 | -13.6226 | 3.39E-25 | 5.74E-24 | 46.5742  |

|           |          |          |          |          |          |          |
|-----------|----------|----------|----------|----------|----------|----------|
| SHARPIN   | -2.18751 | 7.946245 | -13.6155 | 3.51E-25 | 5.95E-24 | 46.53839 |
| METTL22   | -2.50238 | 7.652408 | -13.6009 | 3.78E-25 | 6.37E-24 | 46.46475 |
| CCDC19    | -2.2386  | 6.656634 | -13.5952 | 3.89E-25 | 6.55E-24 | 46.43648 |
| PROX1     | -2.08644 | 5.424008 | -13.5854 | 4.08E-25 | 6.84E-24 | 46.38697 |
| CCT8L2    | -2.1142  | 6.081772 | -13.5683 | 4.45E-25 | 7.44E-24 | 46.30093 |
| DYNC2H1   | -2.655   | 6.933518 | -13.5375 | 5.20E-25 | 8.62E-24 | 46.14564 |
| COQ9      | -2.13783 | 8.464972 | -13.534  | 5.29E-25 | 8.75E-24 | 46.12798 |
| DNALI1    | -3.81483 | 6.67465  | -13.5269 | 5.49E-25 | 9.05E-24 | 46.09184 |
| ASB9      | -3.53444 | 6.163623 | -13.4803 | 6.94E-25 | 1.14E-23 | 45.85691 |
| TRIM13    | -3.40275 | 7.686263 | -13.4801 | 6.95E-25 | 1.14E-23 | 45.85612 |
| EIF4G3    | -2.61193 | 8.174015 | -13.4121 | 9.80E-25 | 1.59E-23 | 45.51265 |
| FEM1C     | -2.23314 | 6.865346 | -13.3806 | 1.15E-24 | 1.86E-23 | 45.35324 |
| NUP98     | -2.1686  | 7.453997 | -13.3684 | 1.22E-24 | 1.96E-23 | 45.29168 |
| SURF2     | -2.73777 | 6.801819 | -13.358  | 1.29E-24 | 2.06E-23 | 45.23892 |
| CDK8      | -2.01013 | 6.214044 | -13.3518 | 1.33E-24 | 2.13E-23 | 45.20744 |
| OXR1      | -3.32142 | 5.580095 | -13.3467 | 1.36E-24 | 2.18E-23 | 45.18158 |
| CDK19     | -2.21718 | 7.410627 | -13.3311 | 1.48E-24 | 2.34E-23 | 45.10277 |
| FAM216A   | -4.63852 | 6.641428 | -13.3309 | 1.48E-24 | 2.34E-23 | 45.10174 |
| PAAF1     | -2.25828 | 8.082401 | -13.3055 | 1.68E-24 | 2.66E-23 | 44.97333 |
| OR7E156P  | -3.40311 | 7.812759 | -13.3047 | 1.69E-24 | 2.66E-23 | 44.96897 |
| UBN1      | -2.59502 | 8.092431 | -13.3015 | 1.72E-24 | 2.70E-23 | 44.95288 |
| SKAP2     | -2.09504 | 5.951353 | -13.2951 | 1.77E-24 | 2.78E-23 | 44.92027 |
| PGR       | -2.28157 | 4.94154  | -13.278  | 1.93E-24 | 3.02E-23 | 44.83373 |
| LOC44160: | -2.22065 | 7.102141 | -13.2667 | 2.05E-24 | 3.18E-23 | 44.77668 |
| CCDC176   | -3.05503 | 7.90462  | -13.2385 | 2.36E-24 | 3.66E-23 | 44.63358 |
| MTO1      | -2.70319 | 6.794142 | -13.2235 | 2.55E-24 | 3.94E-23 | 44.55745 |
| PGBD5     | -2.70003 | 6.224551 | -13.1954 | 2.94E-24 | 4.52E-23 | 44.41526 |
| CTSF      | -3.07027 | 7.726991 | -13.1492 | 3.72E-24 | 5.69E-23 | 44.18047 |
| PEX13     | -2.45031 | 6.584956 | -13.11   | 4.54E-24 | 6.84E-23 | 43.9813  |
| MEPCE     | -2.27728 | 9.182    | -13.1008 | 4.75E-24 | 7.11E-23 | 43.93486 |
| ARL4A     | -3.84212 | 8.540869 | -12.9984 | 8.01E-24 | 1.18E-22 | 43.41354 |
| SPRR2C    | -2.72679 | 5.624144 | -12.9673 | 9.39E-24 | 1.38E-22 | 43.2552  |
| TLR3      | -2.05736 | 5.131031 | -12.9585 | 9.82E-24 | 1.44E-22 | 43.2102  |
| CCDC86    | -2.30288 | 8.291971 | -12.9471 | 1.04E-23 | 1.52E-22 | 43.15251 |
| DENND5B   | -2.0394  | 4.724337 | -12.9467 | 1.04E-23 | 1.52E-22 | 43.15004 |
| NEK4      | -3.94072 | 6.634836 | -12.9403 | 1.08E-23 | 1.57E-22 | 43.11787 |
| PIWIL2    | -2.07299 | 6.332327 | -12.9254 | 1.16E-23 | 1.69E-22 | 43.04179 |
| RANBP9    | -3.30275 | 7.734765 | -12.9098 | 1.26E-23 | 1.82E-22 | 42.9619  |
| WDR60     | -2.53209 | 6.910319 | -12.8903 | 1.39E-23 | 2.01E-22 | 42.86271 |
| PCID2     | -2.30697 | 8.323737 | -12.8552 | 1.66E-23 | 2.40E-22 | 42.68336 |
| PDXK      | -2.70455 | 8.604124 | -12.8479 | 1.73E-23 | 2.49E-22 | 42.64652 |
| DOCK3     | -2.2321  | 5.461148 | -12.8466 | 1.74E-23 | 2.50E-22 | 42.63959 |
| ABCA5     | -2.81581 | 5.757823 | -12.8339 | 1.85E-23 | 2.65E-22 | 42.57497 |
| TFDP3     | -2.01126 | 6.417662 | -12.8282 | 1.91E-23 | 2.73E-22 | 42.5456  |
| ASB8      | -2.03195 | 6.130533 | -12.8257 | 1.93E-23 | 2.76E-22 | 42.53315 |
| TBP       | -2.24299 | 7.621944 | -12.8238 | 1.95E-23 | 2.78E-22 | 42.52328 |
| GDF10     | -2.29802 | 6.33961  | -12.8086 | 2.11E-23 | 2.99E-22 | 42.44549 |
| COX20     | -2.69185 | 6.710333 | -12.7974 | 2.24E-23 | 3.16E-22 | 42.38812 |
| ARFGAP3   | -2.46563 | 7.705581 | -12.7866 | 2.36E-23 | 3.33E-22 | 42.33315 |

|          |          |          |          |          |          |          |
|----------|----------|----------|----------|----------|----------|----------|
| PPEF1    | -3.13003 | 5.773733 | -12.766  | 2.63E-23 | 3.70E-22 | 42.22771 |
| ANKRD55  | -2.30038 | 6.049488 | -12.7533 | 2.80E-23 | 3.93E-22 | 42.16295 |
| STAG3L3  | -2.91559 | 6.570129 | -12.7406 | 2.99E-23 | 4.19E-22 | 42.09776 |
| NPIPB15  | -2.49974 | 7.628854 | -12.7391 | 3.01E-23 | 4.21E-22 | 42.09036 |
| 13-Nov   | -2.96713 | 6.532824 | -12.708  | 3.53E-23 | 4.91E-22 | 41.93131 |
| ETNK2    | -2.62164 | 6.932527 | -12.7008 | 3.67E-23 | 5.08E-22 | 41.89455 |
| MARK4    | -2.66006 | 8.027455 | -12.6693 | 4.31E-23 | 5.94E-22 | 41.73321 |
| AGBL5    | -2.96728 | 8.03377  | -12.6627 | 4.46E-23 | 6.13E-22 | 41.69917 |
| SLC2A8   | -2.29071 | 7.373873 | -12.6624 | 4.46E-23 | 6.13E-22 | 41.69802 |
| ELOVL2   | -2.05933 | 5.653544 | -12.6448 | 4.89E-23 | 6.68E-22 | 41.60752 |
| TBPL1    | -3.3523  | 8.29976  | -12.5872 | 6.57E-23 | 8.88E-22 | 41.3126  |
| TUBGCP5  | -2.17248 | 4.753949 | -12.5855 | 6.62E-23 | 8.95E-22 | 41.30392 |
| SSX2IP   | -2.48096 | 6.781884 | -12.5797 | 6.82E-23 | 9.20E-22 | 41.27409 |
| TEKT2    | -2.36898 | 6.41064  | -12.5791 | 6.84E-23 | 9.22E-22 | 41.2711  |
| SKAP1    | -2.57041 | 6.847066 | -12.5774 | 6.90E-23 | 9.29E-22 | 41.26245 |
| TMBIM4   | -2.22458 | 8.08796  | -12.5667 | 7.30E-23 | 9.77E-22 | 41.20734 |
| OPLAH    | -2.44262 | 6.546276 | -12.562  | 7.47E-23 | 9.98E-22 | 41.18316 |
| TCFL5    | -4.5144  | 7.569513 | -12.5399 | 8.37E-23 | 1.11E-21 | 41.06984 |
| MKLN1    | -2.01151 | 6.986061 | -12.537  | 8.50E-23 | 1.13E-21 | 41.05481 |
| CTAG2    | -2.0897  | 5.89657  | -12.5199 | 9.28E-23 | 1.23E-21 | 40.9674  |
| KLHL12   | -2.62105 | 7.132192 | -12.5079 | 9.87E-23 | 1.30E-21 | 40.90573 |
| AMZ2     | -2.79889 | 9.060716 | -12.5077 | 9.88E-23 | 1.30E-21 | 40.90457 |
| ATP8A2   | -2.42477 | 6.274294 | -12.4934 | 1.06E-22 | 1.40E-21 | 40.83104 |
| PRPH     | -2.04804 | 8.256497 | -12.4792 | 1.14E-22 | 1.50E-21 | 40.75834 |
| ARHGAP19 | -2.36644 | 6.774648 | -12.4598 | 1.26E-22 | 1.66E-21 | 40.65854 |
| RNF10    | -2.20339 | 8.168638 | -12.4556 | 1.29E-22 | 1.69E-21 | 40.6369  |
| ITCH     | -2.33747 | 7.299514 | -12.4306 | 1.47E-22 | 1.91E-21 | 40.50877 |
| CCSER2   | -2.3001  | 7.745478 | -12.3952 | 1.76E-22 | 2.28E-21 | 40.32664 |
| PAK6     | -3.34467 | 6.246423 | -12.3892 | 1.82E-22 | 2.35E-21 | 40.29574 |
| C12orf10 | -2.52462 | 8.402792 | -12.3885 | 1.82E-22 | 2.35E-21 | 40.29216 |
| SLC35G2  | -2.89577 | 6.988268 | -12.3813 | 1.89E-22 | 2.44E-21 | 40.2554  |
| CHODL    | -4.59749 | 6.662978 | -12.3712 | 1.99E-22 | 2.56E-21 | 40.20346 |
| AKAP3    | -4.71896 | 6.705648 | -12.3666 | 2.04E-22 | 2.61E-21 | 40.1799  |
| ZNF536   | -2.11004 | 6.686155 | -12.3651 | 2.06E-22 | 2.63E-21 | 40.17213 |
| ADO      | -2.72229 | 7.767231 | -12.361  | 2.10E-22 | 2.68E-21 | 40.15069 |
| ERI3     | -2.01404 | 7.270218 | -12.3552 | 2.16E-22 | 2.76E-21 | 40.12111 |
| KHDRBS3  | -3.86323 | 7.919214 | -12.3535 | 2.18E-22 | 2.78E-21 | 40.11231 |
| MYLK3    | -2.94446 | 4.978365 | -12.3533 | 2.19E-22 | 2.78E-21 | 40.11125 |
| SMA4     | -2.23784 | 5.871035 | -12.3339 | 2.42E-22 | 3.05E-21 | 40.01138 |
| CDKN2AIP | -2.38291 | 7.053067 | -12.3226 | 2.56E-22 | 3.23E-21 | 39.95337 |
| HGFAC    | -2.31115 | 5.793434 | -12.3008 | 2.87E-22 | 3.60E-21 | 39.84093 |
| POLI     | -3.5492  | 5.807773 | -12.2928 | 2.99E-22 | 3.74E-21 | 39.79969 |
| CRYBG3   | -2.75857 | 8.054011 | -12.2615 | 3.51E-22 | 4.38E-21 | 39.6387  |
| GGNBP2   | -2.21801 | 9.08485  | -12.2399 | 3.92E-22 | 4.90E-21 | 39.52733 |
| APOBEC3C | -2.36097 | 6.188143 | -12.2204 | 4.34E-22 | 5.40E-21 | 39.42714 |
| TPGS2    | -2.36936 | 7.557351 | -12.2041 | 4.72E-22 | 5.85E-21 | 39.34298 |
| AP1G1    | -2.4137  | 8.087507 | -12.1997 | 4.83E-22 | 5.98E-21 | 39.32042 |
| MRGBP    | -3.25152 | 7.229256 | -12.1816 | 5.30E-22 | 6.54E-21 | 39.22703 |
| FAM46C   | -3.54546 | 7.617991 | -12.1765 | 5.44E-22 | 6.71E-21 | 39.20062 |



|           |          |          |          |          |          |          |
|-----------|----------|----------|----------|----------|----------|----------|
| DEPDC1    | -2.65912 | 6.065567 | -12.1761 | 5.45E-22 | 6.71E-21 | 39.19874 |
| MORC2     | -2.26047 | 7.577988 | -12.1649 | 5.78E-22 | 7.08E-21 | 39.14064 |
| SNAP91    | -3.16525 | 5.605191 | -12.1337 | 6.79E-22 | 8.23E-21 | 38.97992 |
| MBNL3     | -3.96506 | 5.430772 | -12.1255 | 7.08E-22 | 8.58E-21 | 38.93756 |
| INPP4B    | -2.38816 | 5.274204 | -12.1043 | 7.90E-22 | 9.55E-21 | 38.82815 |
| SLC4A1AP  | -2.34683 | 7.666272 | -12.0959 | 8.25E-22 | 9.95E-21 | 38.78484 |
| APPBP2    | -2.0915  | 6.360338 | -12.0874 | 8.63E-22 | 1.04E-20 | 38.7406  |
| C21orf91  | -2.49419 | 7.025602 | -12.0857 | 8.70E-22 | 1.05E-20 | 38.73206 |
| IPO5      | -2.57779 | 7.753367 | -12.0795 | 8.99E-22 | 1.08E-20 | 38.7     |
| GRB14     | -3.58791 | 5.22481  | -12.0742 | 9.24E-22 | 1.11E-20 | 38.67242 |
| TPTE      | -6.4765  | 6.113187 | -12.0709 | 9.39E-22 | 1.12E-20 | 38.6555  |
| MUM1      | -2.68602 | 6.111931 | -12.0692 | 9.48E-22 | 1.13E-20 | 38.64692 |
| SPAG4     | -2.5558  | 6.570452 | -12.0501 | 1.05E-21 | 1.25E-20 | 38.54835 |
| ELP5      | -3.2857  | 7.928567 | -12.0434 | 1.08E-21 | 1.29E-20 | 38.51373 |
| TPP2      | -2.20171 | 7.570691 | -12.0379 | 1.11E-21 | 1.32E-20 | 38.48537 |
| PPP1R9A   | -2.39502 | 6.028965 | -12.0298 | 1.16E-21 | 1.38E-20 | 38.44324 |
| BRD1      | -2.51602 | 8.235803 | -12.0055 | 1.32E-21 | 1.56E-20 | 38.3178  |
| IQCG      | -3.87816 | 6.537882 | -11.986  | 1.46E-21 | 1.72E-20 | 38.21707 |
| RNF141    | -2.52142 | 7.476306 | -11.9856 | 1.46E-21 | 1.72E-20 | 38.21508 |
| DCAF6     | -3.04128 | 7.614657 | -11.9695 | 1.59E-21 | 1.86E-20 | 38.13175 |
| TBK1      | -2.38214 | 8.043976 | -11.9438 | 1.81E-21 | 2.12E-20 | 37.9985  |
| TTC17     | -2.46143 | 7.82732  | -11.9281 | 1.97E-21 | 2.30E-20 | 37.91742 |
| WDR19     | -2.67736 | 7.02659  | -11.8978 | 2.30E-21 | 2.67E-20 | 37.76045 |
| MAP7      | -2.53114 | 6.932597 | -11.8864 | 2.44E-21 | 2.82E-20 | 37.70169 |
| INPP1     | -3.34469 | 7.974296 | -11.8849 | 2.46E-21 | 2.84E-20 | 37.69417 |
| GPX4      | -2.54859 | 10.85576 | -11.864  | 2.74E-21 | 3.15E-20 | 37.58573 |
| TESC      | -2.79754 | 6.765524 | -11.8487 | 2.97E-21 | 3.39E-20 | 37.50661 |
| DPY19L2P2 | -2.74082 | 4.728539 | -11.8397 | 3.11E-21 | 3.54E-20 | 37.45973 |
| NAA35     | -2.33493 | 6.480028 | -11.8052 | 3.72E-21 | 4.20E-20 | 37.28144 |
| PVRL3     | -3.40779 | 5.526986 | -11.7792 | 4.26E-21 | 4.78E-20 | 37.1466  |
| POMT1     | -2.20629 | 7.226705 | -11.7613 | 4.67E-21 | 5.23E-20 | 37.05371 |
| GOT1      | -2.31352 | 7.745979 | -11.7602 | 4.70E-21 | 5.25E-20 | 37.04818 |
| PINK1     | -2.65566 | 8.853122 | -11.7368 | 5.31E-21 | 5.92E-20 | 36.92692 |
| FAM178A   | -2.35843 | 7.021474 | -11.73   | 5.50E-21 | 6.12E-20 | 36.89142 |
| RANGRF    | -2.09781 | 8.363686 | -11.7264 | 5.60E-21 | 6.23E-20 | 36.8726  |
| STAT4     | -2.59512 | 7.480874 | -11.7163 | 5.91E-21 | 6.54E-20 | 36.82037 |
| WT1       | -3.53095 | 6.068619 | -11.7043 | 6.29E-21 | 6.95E-20 | 36.75802 |
| EHBP1     | -2.18751 | 7.467853 | -11.7013 | 6.38E-21 | 7.05E-20 | 36.74265 |
| TOMM34    | -2.12925 | 9.430301 | -11.6839 | 6.99E-21 | 7.70E-20 | 36.65233 |
| IPP       | -2.23592 | 5.539766 | -11.6804 | 7.12E-21 | 7.84E-20 | 36.63411 |
| ZCCHC10   | -2.09489 | 6.100868 | -11.6619 | 7.84E-21 | 8.59E-20 | 36.53818 |
| BNC1      | -2.65424 | 5.755897 | -11.6457 | 8.52E-21 | 9.30E-20 | 36.4544  |
| KCNH2     | -2.5403  | 7.622984 | -11.6339 | 9.06E-21 | 9.87E-20 | 36.3929  |
| CCDC53    | -3.54073 | 8.185322 | -11.6252 | 9.48E-21 | 1.03E-19 | 36.34801 |
| NBR1      | -2.1574  | 8.447522 | -11.5428 | 1.46E-20 | 1.56E-19 | 35.91993 |
| FBXL2     | -2.42854 | 6.979617 | -11.5166 | 1.67E-20 | 1.78E-19 | 35.78396 |
| ACE2      | -5.56901 | 5.709315 | -11.4994 | 1.82E-20 | 1.94E-19 | 35.69447 |
| LRRC23    | -2.49715 | 7.407576 | -11.4871 | 1.95E-20 | 2.06E-19 | 35.63064 |
| CLEC16A   | -2.04306 | 7.187924 | -11.4572 | 2.27E-20 | 2.39E-19 | 35.47527 |

|         |          |          |          |          |          |          |
|---------|----------|----------|----------|----------|----------|----------|
| GUCA1A  | -2.91915 | 6.527289 | -11.4526 | 2.33E-20 | 2.45E-19 | 35.45133 |
| CCNJL   | -2.09338 | 6.721314 | -11.437  | 2.53E-20 | 2.64E-19 | 35.37004 |
| OXSM    | -2.11001 | 7.472456 | -11.4337 | 2.57E-20 | 2.68E-19 | 35.35287 |
| NAA16   | -2.37553 | 7.047833 | -11.4336 | 2.57E-20 | 2.68E-19 | 35.35239 |
| DHRS7B  | -2.17375 | 7.350935 | -11.4214 | 2.74E-20 | 2.86E-19 | 35.28906 |
| CETN3   | -4.12257 | 7.757154 | -11.3899 | 3.23E-20 | 3.36E-19 | 35.12523 |
| FBXW7   | -2.03197 | 7.026739 | -11.3866 | 3.28E-20 | 3.41E-19 | 35.10809 |
| DR1     | -2.02157 | 7.162363 | -11.3705 | 3.57E-20 | 3.70E-19 | 35.02432 |
| GLT8D1  | -2.33682 | 7.593765 | -11.3697 | 3.59E-20 | 3.71E-19 | 35.02014 |
| IFT81   | -2.79741 | 7.008297 | -11.3685 | 3.61E-20 | 3.73E-19 | 35.01376 |
| PDE1A   | -3.22937 | 6.13915  | -11.3575 | 3.82E-20 | 3.94E-19 | 34.95654 |
| SCRG1   | -5.52242 | 6.379317 | -11.3511 | 3.95E-20 | 4.07E-19 | 34.92346 |
| CMC2    | -2.36581 | 8.716367 | -11.3462 | 4.05E-20 | 4.17E-19 | 34.89771 |
| ENOX1   | -2.11973 | 5.312768 | -11.346  | 4.06E-20 | 4.17E-19 | 34.89655 |
| PDZD2   | -4.15419 | 6.046142 | -11.3375 | 4.24E-20 | 4.35E-19 | 34.85264 |
| TRIM68  | -2.14302 | 7.263476 | -11.3296 | 4.42E-20 | 4.53E-19 | 34.81128 |
| CALB2   | -3.17209 | 6.504433 | -11.3039 | 5.06E-20 | 5.16E-19 | 34.67746 |
| OR7E37P | -2.07566 | 8.111595 | -11.2818 | 5.67E-20 | 5.78E-19 | 34.56247 |
| PKMYT1  | -2.20687 | 8.476455 | -11.2719 | 5.98E-20 | 6.06E-19 | 34.51087 |
| WASF1   | -3.80762 | 7.116781 | -11.2564 | 6.48E-20 | 6.56E-19 | 34.43055 |
| MLF1    | -4.10484 | 7.730168 | -11.2434 | 6.93E-20 | 7.01E-19 | 34.36245 |
| PSMF1   | -2.59182 | 7.896949 | -11.2337 | 7.29E-20 | 7.35E-19 | 34.31186 |
| KLHDC10 | -2.55735 | 7.168686 | -11.2199 | 7.84E-20 | 7.88E-19 | 34.24012 |
| ERI2    | -2.39505 | 6.34856  | -11.1927 | 9.03E-20 | 9.06E-19 | 34.09848 |
| LPIN1   | -2.18443 | 7.411529 | -11.1714 | 1.01E-19 | 1.01E-18 | 33.98751 |
| GLUD2   | -2.56116 | 6.413646 | -11.1655 | 1.04E-19 | 1.04E-18 | 33.95663 |
| KATNA1  | -2.67407 | 7.632921 | -11.1547 | 1.10E-19 | 1.09E-18 | 33.90037 |
| AKTIP   | -2.35125 | 8.327146 | -11.1388 | 1.20E-19 | 1.18E-18 | 33.81751 |
| TEX11   | -2.08702 | 6.224687 | -11.1332 | 1.23E-19 | 1.21E-18 | 33.78865 |
| MBD2    | -2.03065 | 6.842266 | -11.1196 | 1.32E-19 | 1.30E-18 | 33.7178  |
| CUL9    | -2.00341 | 7.537639 | -11.1191 | 1.33E-19 | 1.30E-18 | 33.71513 |
| MAPK13  | -2.6647  | 7.28666  | -11.0667 | 1.74E-19 | 1.70E-18 | 33.44195 |
| SCCPDH  | -2.89751 | 7.8162   | -11.0563 | 1.84E-19 | 1.79E-18 | 33.38787 |
| MAMLD1  | -2.9598  | 6.821176 | -11.0527 | 1.88E-19 | 1.83E-18 | 33.36883 |
| ANAPC10 | -2.2611  | 6.363387 | -11.0432 | 1.97E-19 | 1.92E-18 | 33.31943 |
| EFHD2   | -2.84827 | 8.123282 | -11.0139 | 2.30E-19 | 2.23E-18 | 33.16668 |
| HSD17B6 | -2.59293 | 5.541565 | -10.9941 | 2.55E-19 | 2.46E-18 | 33.06304 |
| MEA1    | -2.3344  | 10.05226 | -10.9917 | 2.58E-19 | 2.48E-18 | 33.05075 |
| SLC12A2 | -2.23712 | 7.56787  | -10.9773 | 2.78E-19 | 2.67E-18 | 32.9754  |
| DERL2   | -2.00682 | 8.434809 | -10.9768 | 2.79E-19 | 2.67E-18 | 32.97289 |
| CELSR2  | -2.32426 | 7.487868 | -10.9384 | 3.41E-19 | 3.24E-18 | 32.77275 |
| CHIC2   | -3.20156 | 8.014368 | -10.9341 | 3.49E-19 | 3.31E-18 | 32.75012 |
| RAB8B   | -2.83383 | 7.301864 | -10.9329 | 3.51E-19 | 3.33E-18 | 32.74389 |
| CUL1    | -2.1347  | 8.819086 | -10.898  | 4.22E-19 | 3.96E-18 | 32.56176 |
| PITRM1  | -2.07299 | 8.370322 | -10.8896 | 4.40E-19 | 4.13E-18 | 32.51812 |
| RUVBL2  | -2.49521 | 9.743672 | -10.8893 | 4.41E-19 | 4.13E-18 | 32.51651 |
| CEP76   | -2.66089 | 6.303607 | -10.8888 | 4.42E-19 | 4.14E-18 | 32.51357 |
| TMEM8A  | -2.69542 | 8.112835 | -10.8801 | 4.63E-19 | 4.31E-18 | 32.46864 |
| TBC1D8B | -2.3456  | 6.127877 | -10.8778 | 4.69E-19 | 4.36E-18 | 32.45645 |

|           |          |          |          |          |          |          |
|-----------|----------|----------|----------|----------|----------|----------|
| PRND      | -5.16452 | 7.195613 | -10.8774 | 4.69E-19 | 4.36E-18 | 32.45446 |
| SECISBP2  | -2.11635 | 7.577382 | -10.8763 | 4.72E-19 | 4.38E-18 | 32.44844 |
| SCML1     | -3.68784 | 6.470735 | -10.8616 | 5.10E-19 | 4.72E-18 | 32.37201 |
| ME1       | -2.10969 | 5.90673  | -10.8605 | 5.13E-19 | 4.75E-18 | 32.36607 |
| FOXG1     | -2.72485 | 6.006477 | -10.8565 | 5.24E-19 | 4.84E-18 | 32.34504 |
| CDKN3     | -4.16657 | 7.766756 | -10.8515 | 5.38E-19 | 4.96E-18 | 32.31889 |
| DDA1      | -2.43356 | 7.413907 | -10.8425 | 5.64E-19 | 5.19E-18 | 32.27206 |
| FAF1      | -2.13569 | 9.032568 | -10.7992 | 7.07E-19 | 6.44E-18 | 32.04613 |
| CRYZL1    | -2.40522 | 6.461971 | -10.7957 | 7.20E-19 | 6.55E-18 | 32.02773 |
| EIF4ENIF1 | -2.39623 | 7.949852 | -10.7913 | 7.37E-19 | 6.70E-18 | 32.00489 |
| EFHC1     | -3.43146 | 6.831518 | -10.7851 | 7.61E-19 | 6.92E-18 | 31.97234 |
| KATNB1    | -2.03036 | 7.195152 | -10.7653 | 8.44E-19 | 7.66E-18 | 31.86908 |
| TCEAL2    | -4.80787 | 5.526902 | -10.7434 | 9.47E-19 | 8.55E-18 | 31.75451 |
| SOX3      | -2.13685 | 5.471566 | -10.7378 | 9.75E-19 | 8.79E-18 | 31.7253  |
| HPCAL1    | -2.51778 | 7.809094 | -10.7315 | 1.01E-18 | 9.06E-18 | 31.69249 |
| EXOC5     | -3.81761 | 5.768183 | -10.7212 | 1.06E-18 | 9.51E-18 | 31.6389  |
| PAQR3     | -2.49416 | 5.714011 | -10.7191 | 1.08E-18 | 9.61E-18 | 31.6281  |
| LIAS      | -2.41428 | 6.352193 | -10.6842 | 1.29E-18 | 1.14E-17 | 31.4456  |
| RBKS      | -2.08611 | 6.956408 | -10.6689 | 1.40E-18 | 1.24E-17 | 31.36552 |
| PCDH17    | -2.74308 | 8.118123 | -10.6603 | 1.46E-18 | 1.29E-17 | 31.32075 |
| CITED1    | -4.45785 | 7.413577 | -10.6401 | 1.63E-18 | 1.43E-17 | 31.21542 |
| UFSP2     | -2.50678 | 7.429797 | -10.6004 | 2.00E-18 | 1.75E-17 | 31.00777 |
| FAM179B   | -2.38192 | 6.738543 | -10.5931 | 2.08E-18 | 1.82E-17 | 30.96963 |
| TRIP12    | -2.31394 | 10.01711 | -10.591  | 2.10E-18 | 1.84E-17 | 30.9587  |
| PAK3      | -2.1617  | 7.0308   | -10.5159 | 3.12E-18 | 2.68E-17 | 30.56615 |
| DRG1      | -2.05396 | 10.32891 | -10.505  | 3.30E-18 | 2.83E-17 | 30.50951 |
| UBE2M     | -2.00908 | 8.193388 | -10.4983 | 3.42E-18 | 2.93E-17 | 30.47468 |
| NAALAD2   | -2.67255 | 4.889647 | -10.4708 | 3.95E-18 | 3.36E-17 | 30.33089 |
| NXT2      | -2.25109 | 7.005562 | -10.4323 | 4.83E-18 | 4.05E-17 | 30.12978 |
| ST6GALNA  | -3.38491 | 7.645495 | -10.4213 | 5.12E-18 | 4.28E-17 | 30.07195 |
| CLCN3     | -2.25451 | 7.233094 | -10.4108 | 5.41E-18 | 4.51E-17 | 30.01713 |
| PLXNC1    | -2.22352 | 6.197943 | -10.3918 | 5.98E-18 | 4.96E-17 | 29.91814 |
| FAM13B    | -2.77895 | 7.697355 | -10.3874 | 6.12E-18 | 5.08E-17 | 29.89476 |
| ORC3      | -2.297   | 7.386033 | -10.3782 | 6.42E-18 | 5.32E-17 | 29.847   |
| FOXD1     | -2.51    | 5.95833  | -10.3642 | 6.91E-18 | 5.71E-17 | 29.77357 |
| SPHK2     | -2.02554 | 7.1982   | -10.3386 | 7.90E-18 | 6.50E-17 | 29.63994 |
| LRRC16A   | -2.24163 | 6.935584 | -10.3153 | 8.93E-18 | 7.31E-17 | 29.51803 |
| MTCH2     | -2.34605 | 9.883861 | -10.3068 | 9.34E-18 | 7.63E-17 | 29.47351 |
| HSPA2     | -4.71122 | 8.160238 | -10.3003 | 9.66E-18 | 7.88E-17 | 29.43955 |
| PMS1      | -3.33481 | 7.934786 | -10.2992 | 9.71E-18 | 7.92E-17 | 29.43417 |
| PSENNEN   | -2.3083  | 8.143112 | -10.2765 | 1.09E-17 | 8.89E-17 | 29.31525 |
| IDH3A     | -2.16828 | 7.268546 | -10.2472 | 1.28E-17 | 1.03E-16 | 29.16253 |
| SNAPC1    | -3.21169 | 6.291715 | -10.2441 | 1.30E-17 | 1.05E-16 | 29.146   |
| LGALS8    | -2.01464 | 6.546898 | -10.2438 | 1.30E-17 | 1.05E-16 | 29.14481 |
| GOLGA8N   | -3.35705 | 8.679355 | -10.1963 | 1.67E-17 | 1.33E-16 | 28.89654 |
| EXD2      | -2.27367 | 7.641176 | -10.1885 | 1.74E-17 | 1.38E-16 | 28.85574 |
| PELI2     | -2.05061 | 6.85588  | -10.1859 | 1.76E-17 | 1.40E-16 | 28.84211 |
| C9orf40   | -2.09935 | 5.4291   | -10.1802 | 1.81E-17 | 1.44E-16 | 28.81235 |
| KIZ       | -2.79738 | 8.290273 | -10.166  | 1.95E-17 | 1.55E-16 | 28.7382  |

|           |          |          |          |          |          |          |
|-----------|----------|----------|----------|----------|----------|----------|
| MAGEA1    | -2.07643 | 5.000747 | -10.1552 | 2.07E-17 | 1.64E-16 | 28.68161 |
| NBPF1     | -2.41656 | 10.3121  | -10.1429 | 2.20E-17 | 1.74E-16 | 28.61727 |
| OTUD3     | -2.12731 | 7.116203 | -10.1222 | 2.46E-17 | 1.93E-16 | 28.50915 |
| PIGF      | -2.34137 | 7.335108 | -10.1198 | 2.49E-17 | 1.95E-16 | 28.49695 |
| LANCL1    | -2.0336  | 8.497319 | -10.0788 | 3.08E-17 | 2.40E-16 | 28.28259 |
| SAC3D1    | -3.11043 | 6.980867 | -10.0591 | 3.42E-17 | 2.65E-16 | 28.17951 |
| TEX264    | -2.01055 | 7.560424 | -10.0565 | 3.47E-17 | 2.68E-16 | 28.16589 |
| WDR62     | -2.20099 | 7.57003  | -10.0326 | 3.93E-17 | 3.03E-16 | 28.04118 |
| SNX16     | -2.06931 | 5.294422 | -10.0182 | 4.24E-17 | 3.25E-16 | 27.96596 |
| CYB5R4    | -2.45926 | 6.492716 | -10.0041 | 4.56E-17 | 3.49E-16 | 27.89245 |
| ASTN2     | -2.74395 | 6.031523 | -9.99912 | 4.68E-17 | 3.58E-16 | 27.86635 |
| S100BPB   | -2.7282  | 7.698309 | -9.99601 | 4.76E-17 | 3.63E-16 | 27.85009 |
| BCL2L14   | -2.85606 | 7.38284  | -9.99322 | 4.83E-17 | 3.68E-16 | 27.83554 |
| UCHL3     | -2.677   | 8.23552  | -9.97607 | 5.29E-17 | 4.01E-16 | 27.74599 |
| CYP26B1   | -3.02589 | 6.018412 | -9.95835 | 5.80E-17 | 4.38E-16 | 27.65347 |
| GMCL1     | -3.34836 | 6.818201 | -9.91574 | 7.25E-17 | 5.43E-16 | 27.43098 |
| USP25     | -2.42947 | 8.287736 | -9.91212 | 7.39E-17 | 5.52E-16 | 27.4121  |
| JADE3     | -2.45083 | 6.882776 | -9.90567 | 7.65E-17 | 5.70E-16 | 27.37839 |
| MKKS      | -2.32993 | 7.513158 | -9.89689 | 8.00E-17 | 5.97E-16 | 27.33258 |
| LRRC6     | -3.206   | 6.926246 | -9.88886 | 8.35E-17 | 6.21E-16 | 27.29067 |
| CCDC92    | -3.23406 | 8.8057   | -9.88829 | 8.37E-17 | 6.23E-16 | 27.28771 |
| KLHL7     | -2.93581 | 6.680079 | -9.88311 | 8.60E-17 | 6.39E-16 | 27.26062 |
| PBK       | -4.11425 | 6.750395 | -9.87652 | 8.91E-17 | 6.61E-16 | 27.22623 |
| WHSC1     | -2.29249 | 7.355711 | -9.87169 | 9.14E-17 | 6.77E-16 | 27.20101 |
| RPP38     | -2.0723  | 8.268762 | -9.86797 | 9.31E-17 | 6.90E-16 | 27.1816  |
| MAGEB1    | -3.41118 | 5.234599 | -9.84668 | 1.04E-16 | 7.67E-16 | 27.07048 |
| HDGFRP3   | -2.02215 | 6.978299 | -9.83946 | 1.08E-16 | 7.94E-16 | 27.03283 |
| UPF2      | -2.13684 | 7.793073 | -9.82707 | 1.15E-16 | 8.45E-16 | 26.96815 |
| C3orf14   | -2.51846 | 7.923441 | -9.82455 | 1.17E-16 | 8.55E-16 | 26.95501 |
| OARD1     | -2.79728 | 8.453244 | -9.80517 | 1.29E-16 | 9.41E-16 | 26.85388 |
| ME3       | -2.26854 | 6.905687 | -9.76256 | 1.62E-16 | 1.17E-15 | 26.63158 |
| MRPS15    | -2.09986 | 7.608518 | -9.7328  | 1.89E-16 | 1.36E-15 | 26.47637 |
| SECISBP2L | -2.01694 | 6.842973 | -9.72878 | 1.93E-16 | 1.38E-15 | 26.45539 |
| ZNF200    | -2.4583  | 7.417871 | -9.71792 | 2.04E-16 | 1.46E-15 | 26.39879 |
| ZBTB18    | -2.26067 | 6.648438 | -9.70073 | 2.24E-16 | 1.59E-15 | 26.30914 |
| PSMG1     | -3.39061 | 7.928058 | -9.70054 | 2.24E-16 | 1.59E-15 | 26.30812 |
| AGO3      | -2.57651 | 6.735115 | -9.69665 | 2.29E-16 | 1.62E-15 | 26.28787 |
| HSPBAP1   | -2.38528 | 7.015492 | -9.68868 | 2.38E-16 | 1.69E-15 | 26.24632 |
| TTYH1     | -2.82803 | 6.245635 | -9.67842 | 2.51E-16 | 1.78E-15 | 26.19282 |
| FAM208B   | -2.47252 | 7.346785 | -9.67329 | 2.58E-16 | 1.83E-15 | 26.16606 |
| SLC6A1    | -2.03499 | 4.904654 | -9.66913 | 2.64E-16 | 1.87E-15 | 26.14439 |
| SERPINB6  | -2.44639 | 8.992268 | -9.66654 | 2.68E-16 | 1.89E-15 | 26.13087 |
| NDRG4     | -3.71552 | 7.222099 | -9.66344 | 2.72E-16 | 1.92E-15 | 26.11469 |
| PPP2R3C   | -2.82478 | 7.294466 | -9.64828 | 2.94E-16 | 2.07E-15 | 26.03567 |
| ANKRD27   | -2.43188 | 7.576918 | -9.64132 | 3.05E-16 | 2.15E-15 | 25.9994  |
| AZGP1     | -2.54443 | 4.933709 | -9.6344  | 3.17E-16 | 2.22E-15 | 25.96336 |
| SLC4A8    | -2.83905 | 5.404658 | -9.62136 | 3.39E-16 | 2.37E-15 | 25.8954  |
| ATAD2     | -2.67543 | 6.363684 | -9.60534 | 3.69E-16 | 2.57E-15 | 25.8119  |
| PENK      | -4.53889 | 6.859934 | -9.60083 | 3.77E-16 | 2.63E-15 | 25.78841 |

|          |          |          |          |          |          |          |
|----------|----------|----------|----------|----------|----------|----------|
| TCEA2    | -2.89798 | 7.423572 | -9.59217 | 3.95E-16 | 2.74E-15 | 25.74327 |
| IFT57    | -3.2223  | 7.007882 | -9.57133 | 4.40E-16 | 3.04E-15 | 25.6347  |
| DUSP22   | -2.09452 | 8.752755 | -9.56154 | 4.64E-16 | 3.19E-15 | 25.5837  |
| FDXR     | -2.80379 | 7.132537 | -9.56142 | 4.64E-16 | 3.19E-15 | 25.58311 |
| CLK4     | -2.39771 | 7.240475 | -9.55282 | 4.85E-16 | 3.33E-15 | 25.53831 |
| RBBP8    | -2.59294 | 8.24833  | -9.55045 | 4.91E-16 | 3.37E-15 | 25.52594 |
| GAS2L1   | -2.07383 | 7.469758 | -9.53797 | 5.24E-16 | 3.59E-15 | 25.46093 |
| GPR18    | -3.81334 | 5.569092 | -9.53076 | 5.45E-16 | 3.73E-15 | 25.4234  |
| AGPAT5   | -2.12427 | 7.92709  | -9.51478 | 5.92E-16 | 4.04E-15 | 25.34021 |
| BAZ2B    | -2.6702  | 7.978023 | -9.50029 | 6.39E-16 | 4.34E-15 | 25.26476 |
| RNF19B   | -2.48818 | 8.544434 | -9.49215 | 6.66E-16 | 4.52E-15 | 25.22241 |
| FAM118A  | -2.27433 | 6.821484 | -9.48893 | 6.78E-16 | 4.59E-15 | 25.2056  |
| DHX30    | -2.00697 | 8.317692 | -9.48578 | 6.89E-16 | 4.66E-15 | 25.18923 |
| INHBB    | -2.72563 | 7.803408 | -9.47584 | 7.26E-16 | 4.90E-15 | 25.13747 |
| RNF139   | -2.26868 | 8.580242 | -9.47244 | 7.39E-16 | 4.98E-15 | 25.1198  |
| MAGEA11  | -2.18498 | 4.880828 | -9.46074 | 7.85E-16 | 5.28E-15 | 25.05891 |
| BAZ1A    | -3.1364  | 6.888605 | -9.45794 | 7.97E-16 | 5.35E-15 | 25.04434 |
| GSTM3    | -5.24211 | 8.315584 | -9.45489 | 8.10E-16 | 5.43E-15 | 25.02843 |
| CAMLG    | -2.21396 | 9.151725 | -9.41346 | 1.01E-15 | 6.70E-15 | 24.81289 |
| DBF4     | -3.72518 | 7.26733  | -9.40929 | 1.03E-15 | 6.84E-15 | 24.79119 |
| TEX2     | -2.08875 | 8.688247 | -9.40225 | 1.07E-15 | 7.09E-15 | 24.75457 |
| C1orf112 | -2.54982 | 5.754484 | -9.38571 | 1.16E-15 | 7.73E-15 | 24.66857 |
| CAND2    | -3.24966 | 6.991453 | -9.38216 | 1.18E-15 | 7.87E-15 | 24.6501  |
| SEPT10   | -2.41195 | 7.343271 | -9.35799 | 1.34E-15 | 8.91E-15 | 24.52444 |
| KIF2C    | -2.83644 | 8.168897 | -9.32766 | 1.57E-15 | 1.04E-14 | 24.36681 |
| MPC2     | -2.59202 | 9.624644 | -9.32545 | 1.59E-15 | 1.05E-14 | 24.35528 |
| GLRX2    | -2.19444 | 7.877584 | -9.30816 | 1.74E-15 | 1.14E-14 | 24.26545 |
| FZD3     | -2.10144 | 4.998201 | -9.26209 | 2.22E-15 | 1.44E-14 | 24.02618 |
| MYOM2    | -3.46171 | 5.964066 | -9.2436  | 2.44E-15 | 1.57E-14 | 23.93016 |
| COPS3    | -2.16914 | 9.095187 | -9.22991 | 2.62E-15 | 1.69E-14 | 23.85906 |
| CLPX     | -2.29764 | 6.262806 | -9.22876 | 2.64E-15 | 1.69E-14 | 23.85314 |
| POT1     | -2.03    | 7.463872 | -9.2045  | 2.99E-15 | 1.92E-14 | 23.72721 |
| SPAG16   | -2.71902 | 6.39743  | -9.19985 | 3.07E-15 | 1.96E-14 | 23.70307 |
| GULP1    | -2.29084 | 6.286383 | -9.17748 | 3.45E-15 | 2.19E-14 | 23.58703 |
| DMRT1    | -5.04921 | 5.777263 | -9.15728 | 3.83E-15 | 2.43E-14 | 23.48224 |
| C11orf49 | -2.08519 | 7.721854 | -9.14412 | 4.10E-15 | 2.60E-14 | 23.41402 |
| NCAPH    | -2.26329 | 7.781091 | -9.14164 | 4.16E-15 | 2.63E-14 | 23.40116 |
| ZCCHC2   | -2.60049 | 6.445348 | -9.1406  | 4.18E-15 | 2.64E-14 | 23.39577 |
| BCCIP    | -2.29789 | 7.33011  | -9.13286 | 4.35E-15 | 2.74E-14 | 23.35561 |
| KLK11    | -2.4522  | 7.061603 | -9.11909 | 4.67E-15 | 2.94E-14 | 23.28423 |
| 17-Nov   | -2.15436 | 7.08807  | -9.11657 | 4.74E-15 | 2.97E-14 | 23.27117 |
| ISYNA1   | -3.20877 | 8.121563 | -9.10764 | 4.96E-15 | 3.10E-14 | 23.22487 |
| DYNC1LI1 | -2.42043 | 7.324287 | -9.10644 | 4.99E-15 | 3.12E-14 | 23.21868 |
| ALDH9A1  | -2.1442  | 9.401508 | -9.105   | 5.03E-15 | 3.14E-14 | 23.2112  |
| DAZL     | -5.53438 | 5.62249  | -9.04239 | 6.97E-15 | 4.29E-14 | 22.88688 |
| GTF2A2   | -2.60757 | 9.678802 | -9.03557 | 7.22E-15 | 4.44E-14 | 22.85161 |
| RPL39L   | -2.86658 | 7.872875 | -9.01789 | 7.92E-15 | 4.85E-14 | 22.76007 |
| FAM98A   | -2.62002 | 8.86514  | -9.01525 | 8.03E-15 | 4.91E-14 | 22.74641 |
| KDM5B    | -2.02799 | 8.159107 | -9.00209 | 8.60E-15 | 5.24E-14 | 22.6783  |

|          |          |          |          |          |          |          |
|----------|----------|----------|----------|----------|----------|----------|
| TRMT1L   | -2.18367 | 5.807997 | -8.99907 | 8.73E-15 | 5.31E-14 | 22.6627  |
| PSMD6    | -2.10222 | 10.25866 | -8.99696 | 8.83E-15 | 5.36E-14 | 22.65177 |
| TBC1D15  | -2.06899 | 7.804095 | -8.98652 | 9.32E-15 | 5.65E-14 | 22.59776 |
| CYP17A1  | -3.22905 | 6.976927 | -8.98607 | 9.35E-15 | 5.66E-14 | 22.59541 |
| SAR1B    | -2.69938 | 6.901569 | -8.97226 | 1.00E-14 | 6.06E-14 | 22.524   |
| PPARGC1A | -2.23171 | 5.052053 | -8.97084 | 1.01E-14 | 6.10E-14 | 22.51664 |
| ZNF516   | -2.30812 | 5.797574 | -8.95658 | 1.09E-14 | 6.54E-14 | 22.44291 |
| FBXO3    | -2.63843 | 6.459514 | -8.9465  | 1.15E-14 | 6.87E-14 | 22.39079 |
| EPB41L3  | -2.86228 | 6.077781 | -8.92829 | 1.26E-14 | 7.52E-14 | 22.29665 |
| SEC61A2  | -2.04215 | 6.794329 | -8.92825 | 1.26E-14 | 7.52E-14 | 22.29646 |
| MTA1     | -2.00587 | 7.344095 | -8.91314 | 1.37E-14 | 8.09E-14 | 22.21837 |
| TUBG1    | -3.24385 | 8.718989 | -8.90708 | 1.41E-14 | 8.33E-14 | 22.18708 |
| TMX4     | -2.02779 | 7.209899 | -8.90134 | 1.45E-14 | 8.57E-14 | 22.15742 |
| NUCB2    | -2.83555 | 7.926185 | -8.89886 | 1.47E-14 | 8.68E-14 | 22.14459 |
| NXF3     | -4.02311 | 6.579229 | -8.88405 | 1.59E-14 | 9.34E-14 | 22.06812 |
| ACAT1    | -2.38809 | 9.228279 | -8.86866 | 1.72E-14 | 1.01E-13 | 21.98863 |
| ASRGL1   | -3.16158 | 9.178003 | -8.86453 | 1.76E-14 | 1.03E-13 | 21.9673  |
| CROCCP2  | -2.07689 | 7.563855 | -8.85096 | 1.89E-14 | 1.10E-13 | 21.89728 |
| GPATCH2  | -2.41758 | 7.241305 | -8.84274 | 1.97E-14 | 1.15E-13 | 21.85485 |
| ALG8     | -2.20098 | 8.757474 | -8.84151 | 1.98E-14 | 1.15E-13 | 21.84848 |
| DPP8     | -2.55467 | 8.43996  | -8.81728 | 2.25E-14 | 1.30E-13 | 21.72349 |
| G6PD     | -2.01721 | 8.406353 | -8.81708 | 2.25E-14 | 1.30E-13 | 21.72244 |
| TPK1     | -2.1472  | 6.208611 | -8.75095 | 3.17E-14 | 1.80E-13 | 21.38152 |
| SPATA20  | -2.52975 | 9.035418 | -8.74309 | 3.30E-14 | 1.87E-13 | 21.34103 |
| ZNF318   | -2.27159 | 7.307121 | -8.74086 | 3.34E-14 | 1.89E-13 | 21.32955 |
| MICAL2   | -2.00934 | 7.182394 | -8.73603 | 3.42E-14 | 1.93E-13 | 21.30467 |
| HSD17B3  | -2.92794 | 6.849714 | -8.73211 | 3.49E-14 | 1.97E-13 | 21.28448 |
| PPM1G    | -2.12047 | 9.18293  | -8.7314  | 3.51E-14 | 1.97E-13 | 21.28082 |
| SNAP29   | -2.00105 | 8.451324 | -8.7257  | 3.61E-14 | 2.03E-13 | 21.2515  |
| DAAM2    | -2.28518 | 7.244164 | -8.71905 | 3.74E-14 | 2.10E-13 | 21.21727 |
| GYG1     | -2.75772 | 9.387592 | -8.70521 | 4.02E-14 | 2.25E-13 | 21.14602 |
| SH3GL2   | -2.23994 | 4.946381 | -8.70153 | 4.09E-14 | 2.29E-13 | 21.12703 |
| KLK5     | -2.09104 | 6.106325 | -8.69184 | 4.30E-14 | 2.41E-13 | 21.0772  |
| MYO6     | -2.20202 | 6.803444 | -8.68547 | 4.45E-14 | 2.48E-13 | 21.0444  |
| IL13RA2  | -4.39636 | 6.202259 | -8.6687  | 4.85E-14 | 2.70E-13 | 20.95811 |
| PLP1     | -3.71324 | 6.515239 | -8.65809 | 5.13E-14 | 2.84E-13 | 20.90357 |
| DDX43    | -3.7577  | 5.727629 | -8.63387 | 5.81E-14 | 3.20E-13 | 20.77903 |
| SAP130   | -2.07947 | 8.526207 | -8.62284 | 6.15E-14 | 3.38E-13 | 20.72237 |
| P4HTM    | -2.06699 | 7.837344 | -8.56316 | 8.38E-14 | 4.56E-13 | 20.41591 |
| DNAJB9   | -2.06317 | 7.066345 | -8.56099 | 8.47E-14 | 4.61E-13 | 20.40473 |
| STX8     | -2.18747 | 8.574107 | -8.54016 | 9.43E-14 | 5.09E-13 | 20.29787 |
| OPTN     | -2.18369 | 7.7864   | -8.5384  | 9.52E-14 | 5.13E-13 | 20.28885 |
| DACH1    | -2.20715 | 5.238746 | -8.52723 | 1.01E-13 | 5.42E-13 | 20.23158 |
| FAM193A  | -2.18534 | 8.711276 | -8.51622 | 1.07E-13 | 5.72E-13 | 20.17509 |
| TUBB4B   | -2.3158  | 11.18815 | -8.50911 | 1.11E-13 | 5.92E-13 | 20.13869 |
| IFT20    | -2.0684  | 8.474468 | -8.49248 | 1.21E-13 | 6.42E-13 | 20.05344 |
| MFF      | -2.82016 | 7.758411 | -8.47172 | 1.34E-13 | 7.12E-13 | 19.9471  |
| RPS6KC1  | -2.17271 | 7.811904 | -8.47009 | 1.35E-13 | 7.17E-13 | 19.93876 |
| LZTFL1   | -2.71591 | 7.217201 | -8.44534 | 1.54E-13 | 8.10E-13 | 19.81204 |

|          |          |          |          |          |          |          |
|----------|----------|----------|----------|----------|----------|----------|
| LPPR4    | -2.28011 | 5.622485 | -8.42991 | 1.67E-13 | 8.76E-13 | 19.73306 |
| CHPT1    | -2.29895 | 8.449571 | -8.42131 | 1.74E-13 | 9.14E-13 | 19.68907 |
| CLDND1   | -2.65287 | 7.841659 | -8.38666 | 2.08E-13 | 1.08E-12 | 19.51192 |
| LRRN3    | -2.96795 | 7.103697 | -8.38011 | 2.15E-13 | 1.12E-12 | 19.47843 |
| APPL2    | -2.21083 | 6.354928 | -8.35731 | 2.42E-13 | 1.25E-12 | 19.36196 |
| MAGEH1   | -2.44923 | 8.005143 | -8.34881 | 2.53E-13 | 1.30E-12 | 19.31858 |
| NUP155   | -2.94749 | 8.058575 | -8.33377 | 2.73E-13 | 1.40E-12 | 19.24179 |
| ORC2     | -2.42639 | 7.190769 | -8.33287 | 2.75E-13 | 1.41E-12 | 19.23718 |
| SPDL1    | -2.33877 | 7.174732 | -8.33031 | 2.78E-13 | 1.42E-12 | 19.22411 |
| SMC6     | -2.30765 | 8.55665  | -8.30937 | 3.10E-13 | 1.58E-12 | 19.11731 |
| INPP5A   | -2.04016 | 8.980676 | -8.30105 | 3.23E-13 | 1.64E-12 | 19.07488 |
| SPECC1L  | -2.00441 | 8.500607 | -8.24676 | 4.27E-13 | 2.14E-12 | 18.79819 |
| MYL6B    | -2.63512 | 9.424729 | -8.23432 | 4.55E-13 | 2.27E-12 | 18.73485 |
| UAP1     | -2.68945 | 9.092888 | -8.22147 | 4.86E-13 | 2.42E-12 | 18.66948 |
| NCAPG2   | -2.24636 | 7.584476 | -8.19161 | 5.67E-13 | 2.80E-12 | 18.51756 |
| PTBP2    | -2.26269 | 7.762618 | -8.17492 | 6.18E-13 | 3.04E-12 | 18.43272 |
| PDP1     | -2.22364 | 7.515419 | -8.14541 | 7.18E-13 | 3.51E-12 | 18.28283 |
| IPO4     | -2.05885 | 7.85957  | -8.13884 | 7.43E-13 | 3.63E-12 | 18.24948 |
| PON3     | -2.52524 | 7.299418 | -8.1317  | 7.70E-13 | 3.76E-12 | 18.21325 |
| TKTL1    | -5.10202 | 6.972325 | -8.12745 | 7.87E-13 | 3.84E-12 | 18.19165 |
| TAF5     | -2.43888 | 7.528827 | -8.12702 | 7.89E-13 | 3.84E-12 | 18.18948 |
| ZWILCH   | -3.34558 | 7.48216  | -8.10604 | 8.78E-13 | 4.27E-12 | 18.08305 |
| FBXL5    | -2.02932 | 8.187182 | -8.10421 | 8.87E-13 | 4.30E-12 | 18.07375 |
| KDM3A    | -2.16869 | 8.980192 | -8.09063 | 9.50E-13 | 4.60E-12 | 18.00488 |
| CCDC90B  | -2.07798 | 8.670911 | -8.07934 | 1.01E-12 | 4.85E-12 | 17.94767 |
| PRKCZ    | -2.78246 | 8.351493 | -8.06893 | 1.06E-12 | 5.09E-12 | 17.89494 |
| C16orf45 | -2.40727 | 7.044653 | -8.06892 | 1.06E-12 | 5.09E-12 | 17.8949  |
| CYB5R1   | -2.33501 | 8.678874 | -8.06028 | 1.11E-12 | 5.31E-12 | 17.85112 |
| TRAPPC8  | -2.47542 | 9.301498 | -8.05104 | 1.16E-12 | 5.55E-12 | 17.8043  |
| USP32P2  | -3.01228 | 8.054174 | -8.03027 | 1.29E-12 | 6.15E-12 | 17.6992  |
| EPHA4    | -2.13172 | 7.931846 | -8.02665 | 1.32E-12 | 6.25E-12 | 17.68089 |
| REEP1    | -3.6226  | 8.303914 | -8.01817 | 1.38E-12 | 6.51E-12 | 17.63795 |
| DNAJB1   | -2.37681 | 9.113874 | -8.01517 | 1.40E-12 | 6.60E-12 | 17.62277 |
| GATM     | -3.43404 | 6.55153  | -8.01165 | 1.42E-12 | 6.72E-12 | 17.605   |
| VLDLR    | -2.16187 | 5.961541 | -8.00275 | 1.49E-12 | 7.01E-12 | 17.56001 |
| SERPINA5 | -4.86851 | 8.263411 | -7.98743 | 1.61E-12 | 7.56E-12 | 17.48253 |
| SYPL1    | -2.25911 | 8.846296 | -7.97424 | 1.72E-12 | 8.07E-12 | 17.4159  |
| LIPT1    | -2.08398 | 7.222402 | -7.95818 | 1.87E-12 | 8.74E-12 | 17.33482 |
| SLC47A1  | -3.08673 | 7.251039 | -7.93151 | 2.14E-12 | 9.95E-12 | 17.20021 |
| LRIF1    | -2.84871 | 6.926963 | -7.91493 | 2.33E-12 | 1.08E-11 | 17.11663 |
| BAG2     | -2.65636 | 6.212356 | -7.88346 | 2.73E-12 | 1.26E-11 | 16.95803 |
| SLC27A6  | -2.86141 | 5.284249 | -7.87638 | 2.83E-12 | 1.30E-11 | 16.92241 |
| DMTF1    | -2.14593 | 8.485447 | -7.84388 | 3.34E-12 | 1.52E-11 | 16.75884 |
| KIFAP3   | -2.57147 | 8.033704 | -7.8241  | 3.69E-12 | 1.67E-11 | 16.6594  |
| PPFIBP2  | -2.70124 | 7.343505 | -7.81676 | 3.83E-12 | 1.73E-11 | 16.62253 |
| PLEKHO1  | -2.1954  | 8.007821 | -7.81003 | 3.97E-12 | 1.79E-11 | 16.58874 |
| GSTA1    | -2.44237 | 7.207584 | -7.80352 | 4.10E-12 | 1.84E-11 | 16.55603 |
| DDX3Y    | -2.34331 | 7.434055 | -7.80308 | 4.11E-12 | 1.85E-11 | 16.5538  |
| BBX      | -2.30523 | 8.822519 | -7.79097 | 4.37E-12 | 1.96E-11 | 16.493   |

|          |          |          |          |          |          |          |
|----------|----------|----------|----------|----------|----------|----------|
| AGPS     | -2.57493 | 7.259776 | -7.77814 | 4.66E-12 | 2.08E-11 | 16.42862 |
| HMMR     | -2.15694 | 7.596656 | -7.76809 | 4.90E-12 | 2.19E-11 | 16.37822 |
| HSPA14   | -2.37203 | 7.983952 | -7.76631 | 4.95E-12 | 2.21E-11 | 16.36927 |
| CENPU    | -3.9127  | 8.226557 | -7.75858 | 5.15E-12 | 2.29E-11 | 16.33053 |
| RNF219   | -2.05834 | 6.603569 | -7.74726 | 5.45E-12 | 2.42E-11 | 16.27376 |
| YIPF5    | -2.07146 | 6.584684 | -7.73789 | 5.71E-12 | 2.53E-11 | 16.22684 |
| CAPRIN1  | -2.2749  | 9.228806 | -7.70974 | 6.59E-12 | 2.90E-11 | 16.08587 |
| USP1     | -2.3942  | 8.589212 | -7.70942 | 6.60E-12 | 2.90E-11 | 16.08427 |
| ARNT2    | -2.3629  | 6.648159 | -7.65789 | 8.56E-12 | 3.73E-11 | 15.8266  |
| NEK2     | -3.09326 | 7.104158 | -7.65274 | 8.78E-12 | 3.82E-11 | 15.80086 |
| VPS26A   | -2.12621 | 9.585429 | -7.6237  | 1.02E-11 | 4.40E-11 | 15.65592 |
| SUV420H1 | -2.01335 | 8.002622 | -7.61063 | 1.09E-11 | 4.68E-11 | 15.59074 |
| PTTG1    | -2.38351 | 10.21653 | -7.60576 | 1.11E-11 | 4.79E-11 | 15.56645 |
| UBL3     | -2.03673 | 7.62229  | -7.58038 | 1.26E-11 | 5.41E-11 | 15.44002 |
| ELAVL4   | -2.00841 | 6.225927 | -7.57663 | 1.29E-11 | 5.50E-11 | 15.42136 |
| COPS4    | -2.36502 | 8.626308 | -7.5662  | 1.36E-11 | 5.79E-11 | 15.36942 |
| ACSL4    | -2.0381  | 5.740973 | -7.55169 | 1.46E-11 | 6.21E-11 | 15.29721 |
| PRKCDBP  | -2.13885 | 7.257692 | -7.54511 | 1.51E-11 | 6.40E-11 | 15.26449 |
| EMC7     | -2.04909 | 8.839924 | -7.52812 | 1.64E-11 | 6.95E-11 | 15.18002 |
| EMC2     | -2.23571 | 7.799532 | -7.52782 | 1.65E-11 | 6.96E-11 | 15.17853 |
| MTCL1    | -2.20488 | 7.507619 | -7.52698 | 1.65E-11 | 6.98E-11 | 15.17436 |
| WBSCR22  | -2.29125 | 9.50891  | -7.51661 | 1.74E-11 | 7.34E-11 | 15.12283 |
| NDC80    | -2.33869 | 6.180552 | -7.5035  | 1.86E-11 | 7.81E-11 | 15.05774 |
| DDX39A   | -2.42822 | 9.340401 | -7.47597 | 2.14E-11 | 8.93E-11 | 14.92119 |
| PLXDC2   | -2.12951 | 5.897319 | -7.46761 | 2.23E-11 | 9.29E-11 | 14.87969 |
| AASDHPT  | -2.00327 | 8.343483 | -7.46665 | 2.24E-11 | 9.33E-11 | 14.87494 |
| KTN1     | -2.09874 | 9.307066 | -7.45794 | 2.34E-11 | 9.72E-11 | 14.83181 |
| JAM2     | -2.64437 | 7.685143 | -7.43932 | 2.57E-11 | 1.06E-10 | 14.73957 |
| GPR56    | -2.16247 | 7.784203 | -7.39865 | 3.14E-11 | 1.29E-10 | 14.5384  |
| SUCO     | -2.11541 | 8.304891 | -7.38817 | 3.31E-11 | 1.35E-10 | 14.4866  |
| FDFT1    | -2.0032  | 9.725815 | -7.3805  | 3.44E-11 | 1.41E-10 | 14.44874 |
| LOC10027 | -2.49925 | 7.420718 | -7.3437  | 4.14E-11 | 1.67E-10 | 14.26717 |
| SLBP     | -2.50661 | 8.596062 | -7.33897 | 4.24E-11 | 1.71E-10 | 14.24386 |
| COMMD8   | -2.19467 | 8.037542 | -7.29872 | 5.18E-11 | 2.07E-10 | 14.04562 |
| PRKRA    | -2.18315 | 7.958351 | -7.26501 | 6.12E-11 | 2.43E-10 | 13.8799  |
| ACTL6A   | -2.52885 | 7.089696 | -7.24722 | 6.68E-11 | 2.65E-10 | 13.79255 |
| OSR2     | -3.38999 | 5.468096 | -7.23986 | 6.93E-11 | 2.74E-10 | 13.75647 |
| TIPIN    | -2.42592 | 6.378712 | -7.16066 | 1.03E-10 | 3.99E-10 | 13.3686  |
| EIF1B    | -2.29258 | 9.255576 | -7.14494 | 1.11E-10 | 4.30E-10 | 13.2918  |
| MAGEA4   | -3.23023 | 5.142249 | -7.10447 | 1.35E-10 | 5.20E-10 | 13.09439 |
| TSPYL4   | -2.38763 | 7.98285  | -7.08512 | 1.49E-10 | 5.71E-10 | 13.00012 |
| MTX2     | -2.04407 | 8.29751  | -7.0846  | 1.49E-10 | 5.72E-10 | 12.9976  |
| KRT23    | -3.50895 | 6.238397 | -7.06732 | 1.63E-10 | 6.22E-10 | 12.91348 |
| CTR9     | -2.00341 | 8.32876  | -7.06306 | 1.66E-10 | 6.35E-10 | 12.89274 |
| 18-Nov   | -2.27572 | 7.673856 | -7.05484 | 1.73E-10 | 6.60E-10 | 12.8528  |
| ZBTB38   | -2.08848 | 8.570724 | -7.04583 | 1.81E-10 | 6.88E-10 | 12.80901 |
| ASAP2    | -2.98401 | 7.599704 | -7.04162 | 1.85E-10 | 7.02E-10 | 12.78855 |
| STK39    | -2.5526  | 7.445985 | -7.01759 | 2.08E-10 | 7.85E-10 | 12.67189 |
| TUBA4A   | -2.07796 | 7.910118 | -7.00844 | 2.17E-10 | 8.19E-10 | 12.62751 |



|          |          |          |          |          |          |          |
|----------|----------|----------|----------|----------|----------|----------|
| NACC2    | -2.09757 | 6.62777  | -6.98301 | 2.46E-10 | 9.24E-10 | 12.50427 |
| HPRT1    | -2.34855 | 9.494672 | -6.96477 | 2.69E-10 | 1.01E-09 | 12.41601 |
| WDR47    | -2.59241 | 7.286883 | -6.93626 | 3.10E-10 | 1.15E-09 | 12.27817 |
| TDRD7    | -2.21576 | 7.829795 | -6.87013 | 4.28E-10 | 1.56E-09 | 11.95931 |
| TACC3    | -2.13887 | 8.302321 | -6.83048 | 5.19E-10 | 1.87E-09 | 11.76868 |
| RRAGD    | -2.01396 | 7.06936  | -6.81757 | 5.52E-10 | 1.99E-09 | 11.70676 |
| TMEM97   | -2.1322  | 9.077304 | -6.81179 | 5.68E-10 | 2.04E-09 | 11.67898 |
| EZH2     | -2.3915  | 6.838666 | -6.81021 | 5.72E-10 | 2.06E-09 | 11.67143 |
| FAM184A  | -2.38164 | 7.739745 | -6.80709 | 5.81E-10 | 2.09E-09 | 11.65646 |
| WRB      | -2.15444 | 8.539266 | -6.76738 | 7.05E-10 | 2.51E-09 | 11.46628 |
| ALDH1A1  | -3.85654 | 7.003832 | -6.72048 | 8.85E-10 | 3.11E-09 | 11.24221 |
| HLTF     | -2.56126 | 8.792803 | -6.70448 | 9.56E-10 | 3.34E-09 | 11.16592 |
| GMPR     | -2.78716 | 7.58334  | -6.6984  | 9.84E-10 | 3.44E-09 | 11.13695 |
| FANCI    | -2.04653 | 7.693094 | -6.68968 | 1.03E-09 | 3.58E-09 | 11.09541 |
| PNMAL1   | -3.07742 | 7.670076 | -6.67618 | 1.10E-09 | 3.80E-09 | 11.03119 |
| DGAT1    | -2.12843 | 7.281941 | -6.60904 | 1.51E-09 | 5.19E-09 | 10.7124  |
| TOPBP1   | -2.22868 | 8.225667 | -6.60856 | 1.52E-09 | 5.20E-09 | 10.71015 |
| CEP70    | -2.01066 | 7.300669 | -6.56343 | 1.88E-09 | 6.38E-09 | 10.49668 |
| SHCBP1   | -2.01141 | 6.121678 | -6.54919 | 2.02E-09 | 6.79E-09 | 10.42945 |
| AMIGO2   | -2.62041 | 7.104855 | -6.47232 | 2.91E-09 | 9.65E-09 | 10.06759 |
| TNFAIP6  | -2.04876 | 6.404106 | -6.46875 | 2.96E-09 | 9.81E-09 | 10.05083 |
| ZFAND6   | -2.01044 | 9.685287 | -6.45304 | 3.19E-09 | 1.05E-08 | 9.977114 |
| GSPT2    | -2.1429  | 7.735853 | -6.44991 | 3.24E-09 | 1.07E-08 | 9.962456 |
| PTGDS    | -3.93814 | 9.980781 | -6.405   | 4.01E-09 | 1.31E-08 | 9.752264 |
| MAP3K5   | -2.04088 | 7.135865 | -6.40479 | 4.02E-09 | 1.31E-08 | 9.751256 |
| GFPT1    | -2.05095 | 8.65783  | -6.3354  | 5.58E-09 | 1.80E-08 | 9.427807 |
| KIAA1598 | -2.26937 | 7.057354 | -6.32398 | 5.89E-09 | 1.89E-08 | 9.374726 |
| INSL3    | -4.42578 | 6.558794 | -6.31018 | 6.29E-09 | 2.01E-08 | 9.310633 |
| CDO1     | -2.84059 | 6.633815 | -6.27472 | 7.43E-09 | 2.36E-08 | 9.146257 |
| PRPS2    | -2.89243 | 7.600258 | -6.26428 | 7.81E-09 | 2.47E-08 | 9.097929 |
| SLC46A3  | -2.09237 | 7.384887 | -6.25791 | 8.04E-09 | 2.55E-08 | 9.068457 |
| KNTC1    | -2.01775 | 7.392082 | -6.21054 | 1.00E-08 | 3.15E-08 | 8.849815 |
| MANSC1   | -2.14498 | 6.148295 | -6.18559 | 1.13E-08 | 3.52E-08 | 8.734996 |
| CNN1     | -2.38906 | 7.699907 | -6.1828  | 1.14E-08 | 3.57E-08 | 8.722148 |
| NEFM     | -3.18888 | 6.060853 | -6.17155 | 1.21E-08 | 3.75E-08 | 8.670456 |
| KLF11    | -2.01567 | 7.951182 | -6.15666 | 1.29E-08 | 4.00E-08 | 8.602121 |
| SERPINI1 | -2.19409 | 6.774631 | -6.14825 | 1.34E-08 | 4.16E-08 | 8.563526 |
| CPE      | -2.83115 | 7.742035 | -6.08894 | 1.77E-08 | 5.41E-08 | 8.2922   |
| SMARCA1  | -2.04022 | 7.197794 | -6.0611  | 2.02E-08 | 6.13E-08 | 8.165291 |
| PLK2     | -2.92386 | 7.124713 | -6.01996 | 2.44E-08 | 7.36E-08 | 7.978269 |
| CLU      | -3.6792  | 8.392444 | -5.98929 | 2.81E-08 | 8.42E-08 | 7.839256 |
| LOC72839 | -2.34093 | 7.992796 | -5.98862 | 2.82E-08 | 8.44E-08 | 7.836217 |
| NAP1L3   | -2.78795 | 6.924249 | -5.98037 | 2.93E-08 | 8.75E-08 | 7.798878 |
| TUBB4A   | -2.77533 | 7.63117  | -5.97945 | 2.94E-08 | 8.78E-08 | 7.794717 |
| PLA2G16  | -2.43683 | 8.79257  | -5.97056 | 3.06E-08 | 9.12E-08 | 7.754521 |
| TIPARP   | -2.34519 | 8.580721 | -5.94695 | 3.42E-08 | 1.01E-07 | 7.647927 |
| ID4      | -2.01151 | 7.084823 | -5.9073  | 4.10E-08 | 1.20E-07 | 7.469402 |
| IMPA1    | -2.16396 | 9.397146 | -5.86775 | 4.91E-08 | 1.43E-07 | 7.291894 |
| OIP5     | -2.67838 | 7.592619 | -5.84926 | 5.34E-08 | 1.55E-07 | 7.209155 |

|         |          |          |          |          |          |          |
|---------|----------|----------|----------|----------|----------|----------|
| PJA2    | -2.04962 | 8.265318 | -5.8395  | 5.59E-08 | 1.61E-07 | 7.16552  |
| TSPYL5  | -3.09596 | 8.445149 | -5.82985 | 5.84E-08 | 1.68E-07 | 7.122386 |
| DHRS11  | -2.04565 | 6.955527 | -5.81173 | 6.34E-08 | 1.82E-07 | 7.041569 |
| SOX9    | -3.72017 | 7.824546 | -5.75956 | 8.04E-08 | 2.28E-07 | 6.809563 |
| KIF5C   | -2.48862 | 8.054207 | -5.75796 | 8.09E-08 | 2.29E-07 | 6.80245  |
| MAGEA12 | -3.33174 | 5.650704 | -5.7569  | 8.13E-08 | 2.31E-07 | 6.797746 |
| RFWD3   | -2.0142  | 6.28938  | -5.75264 | 8.29E-08 | 2.35E-07 | 6.778876 |
| GATA4   | -2.55034 | 6.267544 | -5.75024 | 8.38E-08 | 2.37E-07 | 6.768221 |
| HOPX    | -3.12422 | 7.68764  | -5.71024 | 1.00E-07 | 2.82E-07 | 6.591224 |
| ZBTB20  | -2.07548 | 6.952077 | -5.70154 | 1.04E-07 | 2.92E-07 | 6.552855 |
| CCNB2   | -2.3996  | 8.996931 | -5.69427 | 1.08E-07 | 3.02E-07 | 6.520745 |
| RASSF2  | -2.17363 | 7.972304 | -5.69123 | 1.09E-07 | 3.05E-07 | 6.507377 |
| HMGCS2  | -3.4625  | 7.37523  | -5.66582 | 1.23E-07 | 3.40E-07 | 6.395496 |
| TTK     | -3.12199 | 7.650454 | -5.65352 | 1.30E-07 | 3.59E-07 | 6.341404 |
| AKAP12  | -3.05388 | 9.52255  | -5.64542 | 1.34E-07 | 3.72E-07 | 6.305852 |
| PNMA1   | -2.16532 | 9.212116 | -5.62254 | 1.49E-07 | 4.10E-07 | 6.205545 |
| CKM     | -2.12539 | 5.959221 | -5.61746 | 1.52E-07 | 4.18E-07 | 6.183308 |
| STAR    | -3.43244 | 6.97624  | -5.5971  | 1.67E-07 | 4.56E-07 | 6.094274 |
| ABCA8   | -3.34075 | 6.586929 | -5.58128 | 1.79E-07 | 4.87E-07 | 6.02522  |
| SLC6A8  | -2.1115  | 8.610079 | -5.55607 | 2.00E-07 | 5.43E-07 | 5.915394 |
| FHL1    | -2.30185 | 7.314716 | -5.5533  | 2.03E-07 | 5.49E-07 | 5.903328 |
| SOBP    | -2.56449 | 7.524569 | -5.487   | 2.72E-07 | 7.27E-07 | 5.615877 |
| PRKCB   | -2.10393 | 6.719317 | -5.40416 | 3.92E-07 | 1.03E-06 | 5.259512 |
| MSMO1   | -2.23483 | 7.788943 | -5.39191 | 4.14E-07 | 1.08E-06 | 5.207081 |
| SPOCK1  | -2.64704 | 7.82393  | -5.36121 | 4.73E-07 | 1.23E-06 | 5.075937 |
| LIPG    | -2.07789 | 6.106003 | -5.35242 | 4.92E-07 | 1.28E-06 | 5.038511 |
| MAGEA6  | -3.92674 | 5.805993 | -5.34962 | 4.98E-07 | 1.29E-06 | 5.026561 |
| TSC22D1 | -2.13656 | 10.07381 | -5.32402 | 5.57E-07 | 1.44E-06 | 4.917714 |
| CEP55   | -2.36038 | 7.769067 | -5.29576 | 6.30E-07 | 1.62E-06 | 4.797856 |
| CADM1   | -2.16643 | 8.30294  | -5.2594  | 7.37E-07 | 1.88E-06 | 4.644279 |
| SYNGR3  | -2.02199 | 7.211632 | -5.21794 | 8.82E-07 | 2.22E-06 | 4.469883 |
| MOK     | -2.60475 | 7.658229 | -5.21017 | 9.12E-07 | 2.29E-06 | 4.437271 |
| NPTX2   | -3.00192 | 7.682805 | -5.18681 | 1.01E-06 | 2.52E-06 | 4.339446 |
| TOP2A   | -2.52687 | 8.233182 | -5.13744 | 1.25E-06 | 3.08E-06 | 4.133597 |
| DONSON  | -2.11241 | 7.169969 | -5.12153 | 1.33E-06 | 3.28E-06 | 4.067517 |
| PFKP    | -2.00225 | 9.102797 | -5.07612 | 1.62E-06 | 3.95E-06 | 3.879586 |
| PRKAR2B | -2.39151 | 7.933922 | -5.04172 | 1.87E-06 | 4.53E-06 | 3.737914 |
| MAGEB2  | -3.11128 | 6.67465  | -4.99931 | 2.24E-06 | 5.37E-06 | 3.564103 |
| NUDT11  | -2.4089  | 8.944003 | -4.96714 | 2.56E-06 | 6.09E-06 | 3.432814 |
| CYP11A1 | -2.579   | 6.463185 | -4.96163 | 2.62E-06 | 6.23E-06 | 3.410383 |
| SLC7A5  | -2.0454  | 9.412779 | -4.87702 | 3.73E-06 | 8.68E-06 | 3.06799  |
| KCNV2   | -2.37555 | 5.271977 | -4.84155 | 4.32E-06 | 1.00E-05 | 2.925525 |
| PLSCR4  | -2.12207 | 7.93356  | -4.8414  | 4.32E-06 | 1.00E-05 | 2.924931 |
| NUPR1   | -2.04787 | 7.690274 | -4.82254 | 4.67E-06 | 1.08E-05 | 2.849472 |
| TJP2    | -2.41226 | 7.939721 | -4.80978 | 4.93E-06 | 1.13E-05 | 2.798517 |
| PRAME   | -2.78973 | 7.839782 | -4.80585 | 5.01E-06 | 1.15E-05 | 2.782846 |
| CST3    | -2.02111 | 10.56235 | -4.75554 | 6.15E-06 | 1.40E-05 | 2.582957 |
| HERC5   | -2.92666 | 8.522217 | -4.49515 | 1.75E-05 | 3.76E-05 | 1.570659 |
| PRC1    | -2.05255 | 8.549199 | -4.43909 | 2.19E-05 | 4.64E-05 | 1.357785 |

|          |          |          |          |          |          |          |
|----------|----------|----------|----------|----------|----------|----------|
| PEG3     | -2.81422 | 7.666541 | -4.37964 | 2.76E-05 | 5.80E-05 | 1.134063 |
| CKS2     | -2.26252 | 9.644786 | -4.36151 | 2.96E-05 | 6.18E-05 | 1.066245 |
| DDAH1    | -2.43731 | 9.085944 | -4.3413  | 3.20E-05 | 6.66E-05 | 0.99088  |
| PEG10    | -2.07669 | 8.536305 | -4.252   | 4.52E-05 | 9.21E-05 | 0.660858 |
| PLAT     | -2.21829 | 7.074586 | -4.19488 | 5.62E-05 | 0.000113 | 0.452352 |
| CPEB1    | -2.27391 | 8.401875 | -4.08797 | 8.39E-05 | 0.000165 | 0.067544 |
| BUB1B    | -2.09309 | 8.414691 | -3.93537 | 0.000147 | 0.00028  | -0.46907 |
| SERPINF1 | -2.24983 | 10.00226 | -3.76462 | 0.000272 | 0.0005   | -1.05124 |
| APOA1    | -3.34534 | 8.452587 | -3.74318 | 0.000293 | 0.000537 | -1.12297 |
| CTSV     | -2.2188  | 9.189896 | -3.69979 | 0.000341 | 0.00062  | -1.26711 |
| BEX1     | -2.44118 | 9.625111 | -3.23478 | 0.001616 | 0.002671 | -2.7279  |

| TCGA DOWN-DEGs |                 |       |         |        |          | Venn gene |
|----------------|-----------------|-------|---------|--------|----------|-----------|
| AACSP1         | ENSG00000100000 | 0.03  | 6.99    | -2.956 | 2.87E-78 | SPACA1    |
| AADACL2        | ENSG00000100000 | 0.3   | 5.48    | -2.317 | 4.96E-54 | LINC00588 |
| AANAT          | ENSG00000100000 | 0.31  | 6.63    | -2.542 | 3.71E-62 | RNFT1     |
| AARD           | ENSG00000100000 | 2.72  | 26.13   | -2.867 | 1.01E-45 | RIBC2     |
| AATBC          | ENSG00000100000 | 0.56  | 8.28    | -2.573 | 1.45E-36 | KPNA5     |
| ABAT           | ENSG00000100000 | 3.38  | 17.019  | -2.041 | 1.61E-35 | ZNF280B   |
| ABCA10         | ENSG00000100000 | 0.53  | 14.5    | -3.341 | 2.82E-97 | DNAI2     |
| ABCA17P        | ENSG00000100000 | 0.68  | 76.478  | -5.527 | 2.57E-90 | NACA2     |
| ABCA5          | ENSG00000100000 | 3.57  | 25.451  | -2.533 | 9.80E-69 | MORC1     |
| ABCA8          | ENSG00000100000 | 0.79  | 33.24   | -4.258 | 1.03E-75 | GPR137    |
| ABCB11         | ENSG00000100000 | 0     | 3.55    | -2.186 | 9.74E-52 | ADAM18    |
| ABCB6          | ENSG00000100000 | 13.47 | 60.989  | -2.099 | 4.77E-54 | ADGB      |
| ABCB9          | ENSG00000100000 | 4.27  | 24.75   | -2.289 | 4.96E-69 | ADCY10    |
| ABCC11         | ENSG00000100000 | 0.14  | 5.2     | -2.443 | 4.42E-74 | CCDC70    |
| ABCC12         | ENSG00000100000 | 0.72  | 15.49   | -3.261 | 3.41E-44 | SPO11     |
| ABCG4          | ENSG00000100000 | 0.47  | 9.34    | -2.814 | 6.03E-58 | RNF32     |
| ABHD1          | ENSG00000100000 | 0.44  | 131.297 | -6.522 | 4.92E-86 | C11orf63  |
| ABHD16B        | ENSG00000100000 | 0     | 19.86   | -4.383 | 1.79E-52 | ADAM2     |
| ABHD2          | ENSG00000100000 | 8.46  | 71.258  | -2.933 | 3.40E-45 | PAPOLB    |
| ABHD8          | ENSG00000100000 | 3.63  | 58.569  | -3.685 | 3.12E-67 | LINC00837 |
| ABLIM1         | ENSG00000100000 | 6.22  | 33.18   | -2.243 | 1.09E-44 | BTG4      |
| ABO            | ENSG00000100000 | 0.27  | 8.83    | -2.952 | 1.18E-69 | DPY19L1P  |
| AC000036       | ENSG00000100000 | 0.05  | 13.12   | -3.749 | 4.22E-57 | LDHAL6B   |
| AC000099       | ENSG00000100000 | 0     | 3.28    | -2.098 | 1.35E-42 | SCIN      |
| AC001226       | ENSG00000100000 | 0.09  | 3.41    | -2.016 | 9.03E-95 | GLB1L     |
| AC002056       | ENSG00000100000 | 0     | 3.39    | -2.134 | 1.20E-41 | CEP112    |
| AC002064       | ENSG00000100000 | 0     | 15.63   | -4.056 | 3.19E-66 | ATXN3L    |
| AC002115       | ENSG00000100000 | 0     | 25.47   | -4.726 | 1.84E-70 | RPGRIP1   |
| AC002117       | ENSG00000100000 | 0     | 4.49    | -2.457 | 1.55E-57 | SYNGR4    |
| AC002310       | ENSG00000100000 | 0.6   | 20.031  | -3.716 | 1.86E-71 | SPATA1    |
| AC002465       | ENSG00000100000 | 0     | 5.89    | -2.784 | 1.20E-51 | SOX30     |
| AC002467       | ENSG00000100000 | 5.34  | 99.988  | -3.994 | 1.36E-64 | TEX12     |
| AC003075       | ENSG00000100000 | 0.24  | 12.35   | -3.428 | 1.95E-78 | CCDC88A   |
| AC003688       | ENSG00000100000 | 0     | 8.43    | -3.237 | 2.45E-08 | CYLC1     |
| AC003973       | ENSG00000100000 | 0     | 3.54    | -2.183 | 5.54E-52 | UBQLN3    |
| AC003991       | ENSG00000100000 | 0.18  | 4.67    | -2.265 | 1.76E-48 | GRK4      |
| AC004009       | ENSG00000100000 | 0     | 18.67   | -4.298 | 6.42E-66 | CCDC186   |
| AC004070       | ENSG00000100000 | 0     | 13.36   | -3.844 | 9.23E-56 | CYLC2     |
| AC004221       | ENSG00000100000 | 0.05  | 6.19    | -2.776 | 4.47E-82 | ERO1LB    |
| AC004381       | ENSG00000100000 | 4.06  | 279.653 | -5.794 | 2.68E-83 | GAPDHS    |
| AC004448       | ENSG00000100000 | 0.27  | 14.05   | -3.567 | 3.24E-63 | AURKC     |
| AC004471       | ENSG00000100000 | 0.1   | 3.47    | -2.023 | 6.38E-77 | GPC5      |
| AC004510       | ENSG00000100000 | 0     | 7.82    | -3.141 | 1.10E-67 | CARF      |
| AC004623       | ENSG00000100000 | 0.88  | 7.33    | -2.148 | 5.21E-78 | LINC00342 |
| AC004692       | ENSG00000100000 | 0     | 4.37    | -2.425 | 8.10E-50 | SPATA31C  |
| AC004862       | ENSG00000100000 | 0     | 5.35    | -2.667 | 8.68E-46 | C20orf195 |
| AC004869       | ENSG00000100000 | 0     | 4.04    | -2.333 | 1.79E-57 | C6orf10   |

|                     |      |         |        |           |          |
|---------------------|------|---------|--------|-----------|----------|
| AC005008. ENSG00000 | 0    | 3.36    | -2.124 | 5.65E-49  | IQCK     |
| AC005009. ENSG00000 | 0    | 3.57    | -2.192 | 3.22E-53  | CAMK4    |
| AC005076. ENSG00000 | 3.81 | 33.77   | -2.854 | 2.63E-48  | ART3     |
| AC005077. ENSG00000 | 0.19 | 13.65   | -3.622 | 3.18E-89  | RFPL3S   |
| AC005077. ENSG00000 | 0    | 3.38    | -2.131 | 1.38E-47  | AKAP4    |
| AC005324. ENSG00000 | 0    | 3.07    | -2.025 | 1.70E-50  | CCHCR1   |
| AC005324. ENSG00000 | 0    | 7.42    | -3.074 | 8.60E-46  | IRGC     |
| AC005391. ENSG00000 | 0    | 4.5     | -2.459 | 8.53E-49  | TSSK2    |
| AC005481. ENSG00000 | 0.05 | 3.41    | -2.07  | 4.46E-100 | GK2      |
| AC005522. ENSG00000 | 0    | 7.33    | -3.058 | 4.22E-61  | NME8     |
| AC005523. ENSG00000 | 0.14 | 6.68    | -2.752 | 1.98E-64  | CBLN1    |
| AC005754. ENSG00000 | 0.08 | 70.722  | -6.053 | 5.10E-76  | CCIN     |
| AC005808. ENSG00000 | 0.16 | 4.83    | -2.329 | 1.55E-42  | USP2     |
| AC006014. ENSG00000 | 0.56 | 75.18   | -5.61  | 2.88E-89  | PPP1R2P9 |
| AC006019. ENSG00000 | 0.17 | 64.52   | -5.807 | 1.50E-52  | ADD3-AS1 |
| AC006116. ENSG00000 | 0.15 | 5.02    | -2.388 | 3.36E-73  | PRKAA1   |
| AC006116. ENSG00000 | 0.41 | 6.14    | -2.34  | 3.98E-48  | ALLC     |
| AC006153. ENSG00000 | 0    | 17.71   | -4.226 | 4.23E-62  | C16orf95 |
| AC006272. ENSG00000 | 0.21 | 5.45    | -2.414 | 2.99E-81  | TEX28    |
| AC006277. ENSG00000 | 0.51 | 11.29   | -3.025 | 2.09E-61  | MYT1L    |
| AC006538. ENSG00000 | 1.22 | 8.07    | -2.03  | 2.79E-50  | COIL     |
| AC006547. ENSG00000 | 0.15 | 63.53   | -5.81  | 2.82E-80  | CT62     |
| AC006942. ENSG00000 | 0.65 | 47.251  | -4.87  | 7.93E-90  | RFX2     |
| AC006946. ENSG00000 | 0.1  | 16.999  | -4.032 | 5.48E-62  | MROH7    |
| AC007000. ENSG00000 | 0    | 10.52   | -3.526 | 2.10E-13  | PRPS1L1  |
| AC007009. ENSG00000 | 0.01 | 5.67    | -2.723 | 8.12E-58  | TNP2     |
| AC007040. ENSG00000 | 0    | 3.52    | -2.176 | 2.57E-50  | C9orf9   |
| AC007131. ENSG00000 | 0    | 9.7     | -3.42  | 9.59E-60  | PSORS1C1 |
| AC007163. ENSG00000 | 0.03 | 7.13    | -2.981 | 1.42E-63  | GPR135   |
| AC007249. ENSG00000 | 0.23 | 7.15    | -2.728 | 2.50E-53  | HSPA1L   |
| AC007391. ENSG00000 | 0    | 6       | -2.807 | 2.63E-54  | TTLL7    |
| AC007392. ENSG00000 | 0    | 4.65    | -2.498 | 3.34E-44  | PMFBP1   |
| AC007392. ENSG00000 | 0    | 3.53    | -2.18  | 1.84E-42  | ZBTB32   |
| AC007403. ENSG00000 | 0    | 3.03    | -2.011 | 7.39E-35  | LRRC36   |
| AC007463. ENSG00000 | 0    | 6.15    | -2.838 | 9.45E-53  | FBXO24   |
| AC007557. ENSG00000 | 0    | 596.673 | -9.223 | 5.73E-74  | POM121L9 |
| AC007557. ENSG00000 | 0    | 7.58    | -3.101 | 1.60E-57  | AQP5     |
| AC007557. ENSG00000 | 0    | 8.98    | -3.319 | 1.20E-55  | ZC2HC1C  |
| AC007557. ENSG00000 | 0    | 16.93   | -4.164 | 5.44E-61  | KDM4D    |
| AC007563. ENSG00000 | 0    | 4.16    | -2.367 | 4.87E-57  | ZNRF4    |
| AC007566. ENSG00000 | 0.85 | 11.55   | -2.762 | 2.13E-84  | ACRV1    |
| AC007879. ENSG00000 | 0.97 | 9.93    | -2.472 | 3.57E-47  | ZSCAN5A  |
| AC007879. ENSG00000 | 0.34 | 6.35    | -2.456 | 1.38E-56  | CTAGE1   |
| AC007966. ENSG00000 | 0.04 | 3.58    | -2.139 | 2.49E-37  | NOL4     |
| AC008073. ENSG00000 | 0    | 6.65    | -2.935 | 1.05E-76  | LRRC48   |
| AC008079. ENSG00000 | 0    | 23.811  | -4.633 | 1.57E-70  | TSGA10   |
| AC008088. ENSG00000 | 0.66 | 34.811  | -4.431 | 1.57E-73  | RDH8     |
| AC008132. ENSG00000 | 0.04 | 192.951 | -7.543 | 5.93E-88  | CATSPERC |
| AC008132. ENSG00000 | 0.03 | 11.64   | -3.617 | 5.44E-65  | APH1B    |

|                     |      |         |        |          |          |
|---------------------|------|---------|--------|----------|----------|
| AC008427. ENSG00000 | 0    | 8.32    | -3.22  | 7.38E-53 | GRAMD1C  |
| AC008694. ENSG00000 | 0    | 35.74   | -5.199 | 1.38E-76 | SLCO3A1  |
| AC009120. ENSG00000 | 0.11 | 4.59    | -2.332 | 1.16E-69 | SNX19    |
| AC009120. ENSG00000 | 4.18 | 22.33   | -2.171 | 4.29E-66 | MNS1     |
| AC009133. ENSG00000 | 0    | 4.07    | -2.342 | 8.71E-19 | SYCP2    |
| AC009158. ENSG00000 | 0    | 7.1     | -3.018 | 4.58E-58 | VPRBP    |
| AC009299. ENSG00000 | 0.09 | 10.79   | -3.435 | 9.45E-60 | LRIT1    |
| AC009303. ENSG00000 | 0    | 3.59    | -2.199 | 7.91E-46 | HIRIP3   |
| AC009365. ENSG00000 | 0    | 6.73    | -2.95  | 3.34E-58 | PACRG    |
| AC009411. ENSG00000 | 0    | 9.43    | -3.383 | 4.04E-57 | ZCCHC14  |
| AC009473. ENSG00000 | 0.15 | 10.6    | -3.334 | 3.76E-68 | IZUMO4   |
| AC009487. ENSG00000 | 0    | 41.859  | -5.422 | 2.00E-68 | TEX15    |
| AC009505. ENSG00000 | 0    | 3.2     | -2.07  | 5.56E-47 | TULP2    |
| AC009506. ENSG00000 | 1.59 | 9.66    | -2.041 | 5.96E-49 | C16orf71 |
| AC010127. ENSG00000 | 0.05 | 11.04   | -3.519 | 9.06E-35 | EFCAB6   |
| AC010168. ENSG00000 | 2.92 | 282.968 | -6.179 | 4.18E-41 | HCFC2    |
| AC010524. ENSG00000 | 0.4  | 8.68    | -2.79  | 5.54E-79 | PGK2     |
| AC010649. ENSG00000 | 0.25 | 28.479  | -4.56  | 2.88E-61 | ADAM5    |
| AC010894. ENSG00000 | 1.24 | 41.22   | -4.236 | 2.50E-82 | WDR78    |
| AC010980. ENSG00000 | 0.13 | 293.069 | -8.024 | 1.45E-86 | PRKACG   |
| AC011196. ENSG00000 | 0    | 4.3     | -2.406 | 9.84E-46 | TDRD1    |
| AC011525. ENSG00000 | 0    | 8.55    | -3.256 | 1.30E-70 | PDHA2    |
| AC011718. ENSG00000 | 0    | 21.18   | -4.471 | 1.34E-66 | CLPB     |
| AC011752. ENSG00000 | 0    | 7.28    | -3.05  | 2.16E-52 | ANKMY1   |
| AC012075. ENSG00000 | 0    | 6.86    | -2.975 | 3.78E-68 | DDX25    |
| AC012370. ENSG00000 | 0    | 19.95   | -4.389 | 3.43E-66 | ADAM30   |
| AC012456. ENSG00000 | 0    | 3.27    | -2.094 | 5.83E-61 | ACTL7B   |
| AC012462. ENSG00000 | 0    | 5.29    | -2.653 | 2.71E-47 | TAF7L    |
| AC012594. ENSG00000 | 0    | 51.14   | -5.704 | 6.18E-69 | SSX3     |
| AC013271. ENSG00000 | 1.37 | 114.126 | -5.602 | 7.72E-58 | CETN1    |
| AC013460. ENSG00000 | 0.02 | 6.95    | -2.962 | 1.04E-52 | RAB27B   |
| AC013470. ENSG00000 | 0    | 6.45    | -2.897 | 1.48E-55 | ZCWPW1   |
| AC013472. ENSG00000 | 0    | 9.33    | -3.369 | 1.25E-65 | LRP2BP   |
| AC015849. ENSG00000 | 0.96 | 11.2    | -2.638 | 7.53E-43 | SLC25A31 |
| AC015849. ENSG00000 | 0.11 | 8.95    | -3.164 | 3.56E-74 | LECT2    |
| AC015922. ENSG00000 | 0.1  | 6.29    | -2.728 | 1.27E-59 | ARHGAP34 |
| AC015971. ENSG00000 | 0.1  | 6.68    | -2.804 | 2.63E-66 | TCP11    |
| AC016582. ENSG00000 | 0.39 | 7.5     | -2.612 | 4.59E-58 | AHI1     |
| AC016738. ENSG00000 | 0    | 5.45    | -2.689 | 3.22E-47 | ACR      |
| AC016738. ENSG00000 | 0.03 | 3.55    | -2.143 | 1.80E-80 | OXCT2    |
| AC016757. ENSG00000 | 0.73 | 39.89   | -4.563 | 1.27E-88 | CAPN11   |
| AC016907. ENSG00000 | 0.02 | 4.57    | -2.449 | 1.04E-71 | TRAPPC12 |
| AC016909. ENSG00000 | 0    | 6.41    | -2.889 | 2.08E-53 | CST8     |
| AC016912. ENSG00000 | 0.51 | 16.89   | -3.567 | 3.43E-51 | CCDC7    |
| AC018766. ENSG00000 | 0.28 | 7.78    | -2.778 | 2.83E-72 | MCF2     |
| AC019048. ENSG00000 | 0    | 4.73    | -2.518 | 3.23E-51 | CLIP4    |
| AC019055. ENSG00000 | 0    | 25.621  | -4.734 | 6.32E-65 | DOC2A    |
| AC019172. ENSG00000 | 0.03 | 7.35    | -3.019 | 1.55E-90 | HHIPL2   |
| AC020956. ENSG00000 | 0    | 5.57    | -2.716 | 1.29E-83 | ST7L     |

|                     |      |        |        |          |           |
|---------------------|------|--------|--------|----------|-----------|
| AC022007. ENSG00000 | 2.37 | 82.458 | -4.63  | 2.94E-78 | CCDC15    |
| AC024560. ENSG00000 | 6.05 | 27.319 | -2.006 | 2.73E-46 | GDF9      |
| AC024619. ENSG00000 | 0    | 19.329 | -4.345 | 1.47E-64 | SLC1A6    |
| AC026471. ENSG00000 | 0.15 | 48.05  | -5.415 | 6.61E-70 | NAT6      |
| AC034198. ENSG00000 | 0    | 7.5    | -3.087 | 4.19E-53 | PIWIL1    |
| AC034220. ENSG00000 | 0.91 | 6.76   | -2.022 | 1.45E-59 | CDADC1    |
| AC034243. ENSG00000 | 0.28 | 5.37   | -2.315 | 9.63E-52 | LYZL6     |
| AC053503. ENSG00000 | 0.22 | 4.09   | -2.061 | 6.27E-67 | SSX1      |
| AC062017. ENSG00000 | 0.47 | 52.211 | -5.178 | 3.47E-90 | SOCS7     |
| AC064834. ENSG00000 | 0    | 4.62   | -2.491 | 2.57E-46 | SPATA6    |
| AC067945. ENSG00000 | 0.14 | 7.88   | -2.962 | 1.38E-59 | HSPA4L    |
| AC068042. ENSG00000 | 0    | 12.3   | -3.733 | 3.07E-61 | HOOK1     |
| AC068538. ENSG00000 | 0    | 7.95   | -3.162 | 9.13E-59 | ZNF821    |
| AC069213. ENSG00000 | 0.15 | 3.81   | -2.064 | 2.52E-23 | SPATA7    |
| AC069363. ENSG00000 | 0.29 | 4.83   | -2.176 | 2.54E-39 | FNDC8     |
| AC073043. ENSG00000 | 0.45 | 56.928 | -5.32  | 2.86E-71 | DKKL1     |
| AC073130. ENSG00000 | 0.01 | 9.79   | -3.417 | 7.08E-59 | ACE       |
| AC073342. ENSG00000 | 0    | 3.51   | -2.173 | 9.51E-70 | MS4A5     |
| AC073464. ENSG00000 | 0    | 33.19  | -5.095 | 1.47E-77 | TSKS      |
| AC073628. ENSG00000 | 0    | 9.64   | -3.411 | 1.12E-54 | SYCP1     |
| AC073636. ENSG00000 | 0    | 4.78   | -2.531 | 1.64E-44 | YPEL1     |
| AC074389. ENSG00000 | 0    | 11.72  | -3.669 | 1.99E-77 | MMP28     |
| AC074391. ENSG00000 | 0.12 | 4      | -2.158 | 2.31E-46 | ROPN1B    |
| AC079305. ENSG00000 | 0.08 | 3.68   | -2.115 | 2.77E-58 | CHD5      |
| AC079354. ENSG00000 | 0.01 | 7.79   | -3.122 | 1.24E-58 | TEX40     |
| AC079354. ENSG00000 | 0.17 | 9.37   | -3.148 | 6.71E-55 | LDHC      |
| AC079776. ENSG00000 | 0.12 | 14.9   | -3.827 | 6.44E-64 | TTC12     |
| AC079779. ENSG00000 | 0    | 16.959 | -4.167 | 1.49E-53 | DNAH17    |
| AC079807. ENSG00000 | 0.7  | 7.16   | -2.263 | 2.53E-90 | CTNNA3    |
| AC079922. ENSG00000 | 0.67 | 5.8    | -2.026 | 7.82E-58 | ZBBX      |
| AC083884. ENSG00000 | 0.17 | 7.01   | -2.775 | 6.64E-96 | TRIM66    |
| AC084082. ENSG00000 | 0    | 6.55   | -2.916 | 1.58E-67 | SHCBP1L   |
| AC091633. ENSG00000 | 0.1  | 6.65   | -2.798 | 2.50E-52 | CRISP2    |
| AC092155. ENSG00000 | 0    | 3.72   | -2.239 | 4.94E-37 | FSCN3     |
| AC092566. ENSG00000 | 0    | 5.61   | -2.725 | 1.64E-38 | UTRN      |
| AC093642. ENSG00000 | 0    | 10.95  | -3.579 | 1.60E-53 | PIGV      |
| AC093716. ENSG00000 | 0.16 | 4.67   | -2.289 | 1.43E-32 | C1orf105  |
| AC093822. ENSG00000 | 0    | 7.77   | -3.133 | 1.51E-59 | PRSS21    |
| AC093901. ENSG00000 | 0.36 | 24.289 | -4.217 | 3.14E-60 | SPTBN2    |
| AC096570. ENSG00000 | 0    | 5.43   | -2.685 | 1.55E-50 | SLC25A28  |
| AC096649. ENSG00000 | 0.15 | 6.65   | -2.734 | 3.14E-63 | ACSBG2    |
| AC096669. ENSG00000 | 0    | 7.58   | -3.101 | 1.24E-56 | ZMYND10   |
| AC097374. ENSG00000 | 0.01 | 3.08   | -2.014 | 1.47E-63 | ACTL7A    |
| AC097467. ENSG00000 | 0    | 17.56  | -4.214 | 7.56E-68 | IL13      |
| AC097495. ENSG00000 | 0    | 13.35  | -3.843 | 2.60E-63 | IFT88     |
| AC098614. ENSG00000 | 1.1  | 16.42  | -3.052 | 2.87E-77 | RAB11FIP5 |
| AC099552. ENSG00000 | 0    | 5.55   | -2.711 | 2.83E-53 | TCP10     |
| AC102948. ENSG00000 | 0    | 4.68   | -2.506 | 3.55E-50 | HSF2BP    |
| AC102953. ENSG00000 | 0    | 9.44   | -3.384 | 5.07E-65 | AGBL2     |

|                     |        |         |        |          |          |
|---------------------|--------|---------|--------|----------|----------|
| AC104113. ENSG00000 | 0      | 3.86    | -2.281 | 3.77E-40 | ZNF473   |
| AC104451. ENSG00000 | 0      | 3.57    | -2.192 | 1.41E-05 | MAPRE3   |
| AC104653. ENSG00000 | 0.3    | 8.4     | -2.854 | 1.36E-57 | DYRK3    |
| AC104654. ENSG00000 | 0      | 9.11    | -3.338 | 6.32E-50 | MAK      |
| AC104655. ENSG00000 | 0.3    | 5.28    | -2.272 | 7.13E-56 | FER      |
| AC104777. ENSG00000 | 0      | 22.33   | -4.544 | 1.42E-64 | CREM     |
| AC105339. ENSG00000 | 0.03   | 15.17   | -3.973 | 1.53E-74 | ELL3     |
| AC108004. ENSG00000 | 0      | 6.31    | -2.87  | 5.05E-47 | SFMBT1   |
| AC108025. ENSG00000 | 0.02   | 3.11    | -2.011 | 2.58E-45 | ZPBP     |
| AC108713. ENSG00000 | 0      | 6.66    | -2.937 | 4.09E-28 | USP32    |
| AC113607. ENSG00000 | 0      | 12.61   | -3.767 | 3.24E-65 | SMG7-AS1 |
| AC113617. ENSG00000 | 0      | 6.73    | -2.95  | 1.68E-68 | BBIP1    |
| AC114271. ENSG00000 | 1.42   | 13.81   | -2.613 | 4.59E-54 | RBMXL2   |
| AC114273. ENSG00000 | 0      | 4.84    | -2.546 | 1.89E-56 | ODF1     |
| AC114783. ENSG00000 | 0      | 126.071 | -6.989 | 8.20E-73 | SOX5     |
| AC114812. ENSG00000 | 0.26   | 92.308  | -6.211 | 4.85E-71 | CHGA     |
| AC114814. ENSG00000 | 0      | 3.34    | -2.118 | 3.72E-46 | HYPM     |
| AC116035. ENSG00000 | 0.07   | 4.14    | -2.264 | 8.82E-20 | DRICH1   |
| AC116614. ENSG00000 | 0.25   | 17.07   | -3.854 | 2.01E-60 | ANKS1B   |
| AC125634. ENSG00000 | 0      | 3.92    | -2.299 | 1.84E-56 | ABCB9    |
| AC129778. ENSG00000 | 0.02   | 5.83    | -2.743 | 3.81E-53 | MAPKBP1  |
| AC132217. ENSG00000 | 7.19   | 57.559  | -2.838 | 1.12E-09 | CHKA     |
| AC135048. ENSG00000 | 1.4    | 18.12   | -2.994 | 9.21E-65 | CCT6B    |
| AC138035. ENSG00000 | 3.29   | 68.588  | -4.02  | 4.16E-54 | TEX30    |
| AC138647. ENSG00000 | 0      | 10.32   | -3.501 | 5.71E-61 | PCSK2    |
| AC140725. ENSG00000 | 0.17   | 8.33    | -2.995 | 4.46E-71 | ALDH1A2  |
| AC144838. ENSG00000 | 0.5    | 7.69    | -2.534 | 6.04E-30 | ANKRD7   |
| AC145123. ENSG00000 | 0      | 8.65    | -3.271 | 1.69E-66 | CLTCL1   |
| AC145343. ENSG00000 | 0.38   | 6.35    | -2.413 | 3.35E-65 | SMPD2    |
| AC159540. ENSG00000 | 9.29   | 184.106 | -4.169 | 1.61E-63 | CCNO     |
| AC234582. ENSG00000 | 0.09   | 7.36    | -2.939 | 1.18E-40 | INTS6    |
| ACACB ENSG00000     | 3.39   | 20.949  | -2.322 | 1.70E-58 | SPANXB1  |
| ACADL ENSG00000     | 0.22   | 4.7     | -2.224 | 3.79E-48 | TEX14    |
| ACAP1 ENSG00000     | 11.9   | 126.386 | -3.304 | 2.60E-44 | MAGEC1   |
| ACAT1 ENSG00000     | 19.401 | 110.614 | -2.452 | 1.35E-77 | BAP1     |
| ACCS ENSG00000      | 3.83   | 33.469  | -2.835 | 1.51E-54 | FGFR1OP  |
| ACE ENSG00000       | 27.07  | 161.634 | -2.535 | 1.37E-18 | CDKL3    |
| ACE2 ENSG00000      | 0.35   | 34.671  | -4.724 | 7.42E-79 | SAMD4A   |
| ACOX2 ENSG00000     | 3.87   | 27.059  | -2.526 | 1.68E-27 | CASC1    |
| ACPT ENSG00000      | 0.03   | 4.94    | -2.528 | 4.93E-53 | NR3C2    |
| ACR ENSG00000       | 0.17   | 121.759 | -6.713 | 1.53E-81 | CCNA1    |
| ACRBP ENSG00000     | 4.49   | 401.289 | -6.195 | 1.34E-73 | PHF1     |
| ACRC ENSG00000      | 1.28   | 12.47   | -2.563 | 3.53E-54 | PRM2     |
| ACRV1 ENSG00000     | 0.24   | 155.19  | -6.977 | 4.25E-74 | TTBK2    |
| ACSBG1 ENSG00000    | 0.41   | 7.41    | -2.576 | 9.89E-56 | ARHGAP28 |
| ACSBG2 ENSG00000    | 0.35   | 235.094 | -7.45  | 5.03E-76 | MTL5     |
| ACSL1 ENSG00000     | 9.18   | 55.039  | -2.461 | 1.52E-46 | TSSK1B   |
| ACSM1 ENSG00000     | 0.12   | 6.76    | -2.793 | 4.40E-98 | HRASLS   |
| ACSM3 ENSG00000     | 2.63   | 31.6    | -3.167 | 1.01E-60 | PRM1     |



|           |           |        |         |        |           |          |
|-----------|-----------|--------|---------|--------|-----------|----------|
| ACSS1     | ENSG00000 | 4.99   | 51.388  | -3.129 | 9.50E-65  | SLC6A16  |
| ACTA2     | ENSG00000 | 76.351 | 365.872 | -2.246 | 2.97E-15  | ODF2     |
| ACTA2-AS  | ENSG00000 | 0.34   | 11.3    | -3.198 | 7.59E-48  | STAG3    |
| ACTG1P17  | ENSG00000 | 0.6    | 10.41   | -2.834 | 5.26E-82  | SPA17    |
| ACTL10    | ENSG00000 | 0.35   | 77.831  | -5.868 | 7.54E-69  | C2orf42  |
| ACTL7A    | ENSG00000 | 0      | 295.291 | -8.211 | 3.85E-76  | FKBP6    |
| ACTL7B    | ENSG00000 | 0      | 157.465 | -7.308 | 1.83E-79  | GSG1     |
| ACTL8     | ENSG00000 | 0.29   | 9.68    | -3.05  | 1.74E-70  | SAYSD1   |
| ACTL9     | ENSG00000 | 0      | 148.92  | -7.228 | 3.60E-72  | FRMPD1   |
| ACTN2     | ENSG00000 | 1.63   | 15.56   | -2.655 | 2.00E-56  | GSTA3    |
| ACTN3     | ENSG00000 | 0.38   | 4.88    | -2.091 | 9.15E-42  | SLC2A5   |
| ACTRT1    | ENSG00000 | 0.02   | 4.5     | -2.431 | 2.47E-49  | TEX13A   |
| ACTRT2    | ENSG00000 | 0      | 207.777 | -7.706 | 1.53E-74  | SMCP     |
| ACTRT3    | ENSG00000 | 0.79   | 61.32   | -5.122 | 2.56E-68  | C10orf88 |
| ACYP1     | ENSG00000 | 7.67   | 35.099  | -2.058 | 1.44E-66  | LY6G5C   |
| ADAD1     | ENSG00000 | 0.28   | 97.099  | -6.26  | 1.47E-78  | TTC30A   |
| ADAD2     | ENSG00000 | 1.04   | 143.081 | -6.142 | 2.93E-90  | NUP62CL  |
| ADAM11    | ENSG00000 | 0.84   | 10.29   | -2.617 | 8.62E-73  | C1QTNF9B |
| ADAM18    | ENSG00000 | 0.23   | 15.85   | -3.776 | 6.65E-59  | PHF7     |
| ADAM2     | ENSG00000 | 0      | 30.659  | -4.985 | 6.98E-75  | RPL10L   |
| ADAM20    | ENSG00000 | 0.03   | 5.48    | -2.653 | 4.50E-58  | LRP8     |
| ADAM21    | ENSG00000 | 0.1    | 10.16   | -3.343 | 1.55E-59  | ZNHIT2   |
| ADAM29    | ENSG00000 | 0.02   | 45.972  | -5.525 | 2.57E-72  | NDUFAF3  |
| ADAM30    | ENSG00000 | 0      | 21.681  | -4.503 | 3.08E-69  | PCYT2    |
| ADAM32    | ENSG00000 | 1.13   | 47.751  | -4.517 | 2.36E-62  | SPAG1    |
| ADAM33    | ENSG00000 | 3.21   | 48.1    | -3.544 | 2.49E-55  | SPEF1    |
| ADAM3A    | ENSG00000 | 0      | 18.02   | -4.249 | 1.07E-38  | CRAT     |
| ADAM5     | ENSG00000 | 0      | 24.87   | -4.693 | 1.23E-61  | INHA     |
| ADAM6     | ENSG00000 | 0      | 16.7    | -4.146 | 1.54E-63  | CUL3     |
| ADAMTS10  | ENSG00000 | 2.35   | 22.47   | -2.809 | 1.07E-68  | RNF17    |
| ADAMTS17  | ENSG00000 | 0.99   | 9.15    | -2.351 | 1.49E-51  | DUSP13   |
| ADAMTS71  | ENSG00000 | 0.06   | 5.01    | -2.503 | 3.12E-57  | CLGN     |
| ADARB2    | ENSG00000 | 0.17   | 8.01    | -2.945 | 3.35E-90  | OAZ3     |
| ADCY10    | ENSG00000 | 0.24   | 23.28   | -4.291 | 1.69E-70  | TNP1     |
| ADCY10P1  | ENSG00000 | 0.69   | 16.16   | -3.344 | 7.02E-81  | LIN7A    |
| ADCY2     | ENSG00000 | 0.27   | 6.52    | -2.566 | 8.91E-48  | YBX2     |
| ADCY5     | ENSG00000 | 1.29   | 13.23   | -2.636 | 6.67E-32  | DDX4     |
| ADD3-AS1  | ENSG00000 | 0.58   | 92.078  | -5.88  | 8.49E-86  | ULK2     |
| ADGB      | ENSG00000 | 0.23   | 30.181  | -4.664 | 8.46E-64  | ZNF165   |
| ADGRG1    | ENSG00000 | 5      | 60.85   | -3.366 | 1.08E-42  | DNAI1    |
| ADGRL3-A  | ENSG00000 | 0      | 4.78    | -2.531 | 3.45E-40  | HMGN5    |
| ADHFE1    | ENSG00000 | 1.96   | 21.769  | -2.943 | 2.33E-71  | CEP350   |
| ADIG      | ENSG00000 | 0      | 75.892  | -6.265 | 2.93E-71  | VCX2     |
| ADIRF     | ENSG00000 | 3.87   | 27.49   | -2.548 | 3.11E-18  | BAG1     |
| ADIRF-AS1 | ENSG00000 | 0.71   | 54.89   | -5.031 | 6.50E-103 | IGLL1    |
| ADNP-AS1  | ENSG00000 | 0.88   | 29.73   | -4.031 | 1.70E-83  | TSNAXIP1 |
| ADORA1    | ENSG00000 | 1.62   | 27.81   | -3.459 | 3.60E-66  | IQCE     |
| ADORA2A-  | ENSG00000 | 0.21   | 20.22   | -4.132 | 3.05E-83  | DXO      |
| ADORA3    | ENSG00000 | 1.81   | 66.721  | -4.591 | 8.67E-63  | ADAM3A   |

|            |           |       |         |        |          |          |
|------------|-----------|-------|---------|--------|----------|----------|
| ADPGK-AS   | ENSG00000 | 0.15  | 4.28    | -2.199 | 6.76E-63 | DNAH7    |
| ADRA2A     | ENSG00000 | 0.76  | 6.5     | -2.091 | 2.24E-38 | SPAG6    |
| ADSSL1     | ENSG00000 | 3.87  | 83.62   | -4.119 | 9.88E-79 | USP29    |
| AF038458.1 | ENSG00000 | 0.07  | 4.16    | -2.27  | 1.63E-52 | CDKL2    |
| AF067845.1 | ENSG00000 | 0     | 4.5     | -2.459 | 9.75E-71 | VRK3     |
| AF131216.1 | ENSG00000 | 0.59  | 45.129  | -4.859 | 2.91E-66 | SH3TC2   |
| AF146191.1 | ENSG00000 | 0.18  | 6.7     | -2.706 | 1.67E-74 | DFNB31   |
| AF186192.6 | ENSG00000 | 0.39  | 7.15    | -2.552 | 2.57E-60 | RALGPS1  |
| AFF3       | ENSG00000 | 0.86  | 6.88    | -2.083 | 1.66E-38 | PHKG2    |
| AGAP10P    | ENSG00000 | 0.38  | 12.09   | -3.246 | 1.68E-78 | NRIP3    |
| AGAP11     | ENSG00000 | 0.18  | 5.65    | -2.495 | 2.91E-90 | CYB5R2   |
| AGAP5      | ENSG00000 | 3.84  | 19.95   | -2.114 | 1.99E-60 | BRDT     |
| AGAP7P     | ENSG00000 | 0.72  | 9.47    | -2.606 | 1.80E-48 | TOLLIP   |
| AGAP9      | ENSG00000 | 4.57  | 33.321  | -2.623 | 3.39E-52 | IFT140   |
| AGBL1-AS1  | ENSG00000 | 0     | 12.75   | -3.781 | 8.53E-59 | RSPH6A   |
| AGBL2      | ENSG00000 | 0.66  | 53.241  | -5.03  | 1.43E-80 | TBL2     |
| AGBL3      | ENSG00000 | 1.26  | 11.65   | -2.485 | 1.73E-70 | KIAA0895 |
| AGBL5      | ENSG00000 | 19.24 | 289.014 | -3.841 | 1.47E-59 | H2AFJ    |
| AGPAT3     | ENSG00000 | 9.19  | 46.62   | -2.224 | 9.35E-32 | VAMP2    |
| AGPAT9     | ENSG00000 | 0.55  | 9.13    | -2.708 | 6.41E-52 | GID4     |
| AGT        | ENSG00000 | 0.27  | 5.08    | -2.259 | 1.52E-06 | ADORA1   |
| AHI1       | ENSG00000 | 6.16  | 45.339  | -2.694 | 1.84E-67 | B9D1     |
| AHRR       | ENSG00000 | 0.33  | 63.619  | -5.602 | 1.99E-85 | CCDC181  |
| AHSA2      | ENSG00000 | 11.42 | 89.647  | -2.868 | 3.35E-64 | SPINK2   |
| AHSP       | ENSG00000 | 0.37  | 5.04    | -2.14  | 3.13E-37 | TLE4     |
| AJ011932.1 | ENSG00000 | 0.5   | 9.56    | -2.816 | 1.74E-47 | CNNM1    |
| AK1        | ENSG00000 | 20.41 | 179.731 | -3.077 | 3.82E-64 | C9orf116 |
| AK7        | ENSG00000 | 1     | 7.9     | -2.154 | 1.70E-44 | CNTRL    |
| AK8        | ENSG00000 | 1.26  | 33.321  | -3.925 | 7.87E-62 | CTNNA2   |
| AK9        | ENSG00000 | 0.78  | 20.21   | -3.575 | 4.30E-89 | SLC30A4  |
| AKAP14     | ENSG00000 | 0     | 100.837 | -6.67  | 1.73E-67 | SRPK2    |
| AKAP3      | ENSG00000 | 4.77  | 103.113 | -4.173 | 4.08E-38 | CDK20    |
| AKAP4      | ENSG00000 | 0.01  | 257.28  | -7.998 | 2.07E-77 | FAAH     |
| AKAP6      | ENSG00000 | 0.42  | 6.63    | -2.426 | 2.03E-60 | PIP5K1C  |
| AKNAD1     | ENSG00000 | 0.24  | 11.35   | -3.316 | 6.74E-55 | TP53TG5  |
| AKR1C1     | ENSG00000 | 1.2   | 19.569  | -3.225 | 7.52E-37 | BRAP     |
| AKR1C2     | ENSG00000 | 0.63  | 12.99   | -3.101 | 1.55E-31 | CCNH     |
| AKR1D1     | ENSG00000 | 0.01  | 4.31    | -2.394 | 1.09E-34 | NME5     |
| AKR1E2     | ENSG00000 | 1.41  | 48.751  | -4.368 | 4.52E-88 | ATF7IP2  |
| AL031601.1 | ENSG00000 | 0     | 3.26    | -2.091 | 5.30E-54 | CABYR    |
| AL050303.1 | ENSG00000 | 0     | 5.5     | -2.7   | 6.21E-55 | RUFY3    |
| AL121578.1 | ENSG00000 | 0     | 5.15    | -2.621 | 1.05E-48 | ZDHHC14  |
| AL121656.1 | ENSG00000 | 0     | 5.47    | -2.694 | 1.07E-49 | DPEP3    |
| AL157871.1 | ENSG00000 | 0     | 4.57    | -2.478 | 1.49E-31 | ZNF415   |
| AL157902.1 | ENSG00000 | 0     | 11.06   | -3.592 | 2.35E-66 | SLC30A3  |
| AL353997.1 | ENSG00000 | 0.07  | 25.871  | -4.65  | 2.39E-81 | NR0B1    |
| AL442127.1 | ENSG00000 | 0     | 17.14   | -4.181 | 4.80E-10 | FAM53C   |
| AL450226.1 | ENSG00000 | 0     | 21.381  | -4.484 | 2.06E-62 | PLSCR2   |
| AL589743.1 | ENSG00000 | 0.62  | 5.61    | -2.029 | 2.24E-33 | CSNK2A2  |

|            |           |        |         |        |           |          |
|------------|-----------|--------|---------|--------|-----------|----------|
| AL591893.. | ENSG00000 | 0.03   | 4.74    | -2.478 | 3.36E-58  | KLHL11   |
| ALB        | ENSG00000 | 0.3    | 4.79    | -2.155 | 4.95E-14  | DZIP1    |
| ALDH1A1    | ENSG00000 | 14.25  | 132.293 | -3.128 | 5.78E-44  | PIK3R3   |
| ALDH1A2    | ENSG00000 | 0.65   | 42.7    | -4.727 | 4.62E-60  | SIK3     |
| ALDH1L1    | ENSG00000 | 0.53   | 22.95   | -3.968 | 8.00E-78  | PAOX     |
| ALKBH3-A   | ENSG00000 | 0.21   | 14.37   | -3.667 | 9.50E-66  | KCTD13   |
| ALKBH7     | ENSG00000 | 90.722 | 745.156 | -3.024 | 1.47E-47  | HAGH     |
| ALLC       | ENSG00000 | 0.05   | 30.61   | -4.912 | 2.10E-90  | TTLL1    |
| ALOX12-A   | ENSG00000 | 2.14   | 12.92   | -2.148 | 1.55E-83  | PGAM2    |
| ALOX12P2   | ENSG00000 | 1.05   | 11.14   | -2.566 | 4.14E-44  | GRAMD1B  |
| ALS2CR11   | ENSG00000 | 2.2    | 29.84   | -3.269 | 8.14E-45  | FHL5     |
| ALS2CR12   | ENSG00000 | 0.19   | 18.63   | -4.044 | 3.81E-65  | LRRC49   |
| AMH        | ENSG00000 | 3.47   | 24.55   | -2.515 | 3.70E-38  | FUZ      |
| AMHR2      | ENSG00000 | 1.17   | 17.289  | -3.075 | 1.96E-47  | SHARPIN  |
| AMN1       | ENSG00000 | 8      | 47.261  | -2.423 | 6.11E-49  | PROX1    |
| AMOTL1     | ENSG00000 | 1.51   | 13.39   | -2.519 | 3.46E-23  | CCT8L2   |
| AMY1C      | ENSG00000 | 0      | 6.84    | -2.971 | 1.13E-38  | DYNC2H1  |
| AMZ2P1     | ENSG00000 | 6.02   | 49.931  | -2.859 | 3.34E-89  | DNALI1   |
| ANG        | ENSG00000 | 2.52   | 13.99   | -2.09  | 1.37E-25  | ASB9     |
| ANGEL1     | ENSG00000 | 14.21  | 66.911  | -2.159 | 1.04E-36  | TRIM13   |
| ANKAR      | ENSG00000 | 0.79   | 11.04   | -2.75  | 6.36E-89  | EIF4G3   |
| ANKEF1     | ENSG00000 | 2.27   | 25.38   | -3.012 | 6.46E-50  | NUP98    |
| ANKFN1     | ENSG00000 | 0.05   | 4.06    | -2.269 | 6.38E-56  | OXR1     |
| ANKMY1     | ENSG00000 | 3.91   | 95.882  | -4.302 | 1.31E-81  | CDK19    |
| ANKRD12    | ENSG00000 | 4.15   | 27.04   | -2.445 | 4.53E-61  | FAM216A  |
| ANKRD13B   | ENSG00000 | 2.65   | 36.719  | -3.369 | 7.98E-73  | OR7E156P |
| ANKRD18A   | ENSG00000 | 0.47   | 21.23   | -3.919 | 4.71E-76  | SKAP2    |
| ANKRD18B   | ENSG00000 | 0.55   | 8.84    | -2.666 | 8.84E-62  | PGR      |
| ANKRD18C   | ENSG00000 | 0.15   | 3.7     | -2.031 | 5.05E-61  | CCDC176  |
| ANKRD18C   | ENSG00000 | 0.06   | 3.75    | -2.164 | 2.94E-66  | CTSF     |
| ANKRD19P   | ENSG00000 | 2.08   | 85.912  | -4.819 | 2.99E-38  | ARL4A    |
| ANKRD20A   | ENSG00000 | 0.3    | 10.13   | -3.098 | 7.77E-85  | SPRR2C   |
| ANKRD20A   | ENSG00000 | 0.02   | 3.72    | -2.21  | 2.81E-68  | PIWIL2   |
| ANKRD20A   | ENSG00000 | 0.09   | 18.77   | -4.181 | 1.42E-81  | WDR60    |
| ANKRD20A   | ENSG00000 | 0.08   | 4.32    | -2.3   | 3.19E-72  | PDXK     |
| ANKRD20A   | ENSG00000 | 0.16   | 3.79    | -2.046 | 1.51E-58  | DOCK3    |
| ANKRD20A   | ENSG00000 | 0.76   | 33.369  | -4.287 | 2.21E-64  | ABCA5    |
| ANKRD24    | ENSG00000 | 1.87   | 17.66   | -2.701 | 3.73E-70  | TFDP3    |
| ANKRD26P   | ENSG00000 | 2.69   | 99.408  | -4.766 | 3.05E-43  | GDF10    |
| ANKRD30B   | ENSG00000 | 0.01   | 18.11   | -4.242 | 1.87E-68  | PPEF1    |
| ANKRD30B   | ENSG00000 | 0.05   | 21.561  | -4.425 | 1.91E-88  | STAG3L3  |
| ANKRD30B   | ENSG00000 | 0      | 9.27    | -3.36  | 3.42E-72  | NPIPB15  |
| ANKRD31    | ENSG00000 | 0.12   | 6.02    | -2.648 | 3.79E-86  | ETNK2    |
| ANKRD36B   | ENSG00000 | 2.07   | 23.98   | -3.024 | 1.66E-54  | MARK4    |
| ANKRD36C   | ENSG00000 | 1.03   | 17.03   | -3.151 | 9.41E-103 | AGBL5    |
| ANKRD42    | ENSG00000 | 2.9    | 47.399  | -3.633 | 2.24E-89  | SLC2A8   |
| ANKRD45    | ENSG00000 | 0.72   | 14.79   | -3.198 | 5.96E-66  | ELOVL2   |
| ANKRD50    | ENSG00000 | 1.62   | 11.27   | -2.227 | 7.61E-41  | TBPL1    |
| ANKRD53    | ENSG00000 | 0.59   | 40.369  | -4.701 | 5.74E-70  | SSX2IP   |

|           |           |       |         |        |           |          |
|-----------|-----------|-------|---------|--------|-----------|----------|
| ANKRD60   | ENSG00000 | 0     | 4.04    | -2.333 | 2.00E-52  | TEKT2    |
| ANKRD61   | ENSG00000 | 0.19  | 6.77    | -2.707 | 1.35E-56  | SKAP1    |
| ANKRD65   | ENSG00000 | 1.51  | 9.29    | -2.035 | 6.27E-31  | TMBIM4   |
| ANKRD7    | ENSG00000 | 1.54  | 663.107 | -8.03  | 8.53E-83  | OPLAH    |
| ANKRD9    | ENSG00000 | 5.31  | 49.559  | -3.002 | 7.73E-59  | TCFL5    |
| ANKS1B    | ENSG00000 | 1.03  | 19.849  | -3.36  | 1.34E-53  | CTAG2    |
| ANO1      | ENSG00000 | 2.48  | 17.8    | -2.434 | 1.46E-30  | ATP8A2   |
| ANO1-AS2  | ENSG00000 | 0     | 7.39    | -3.069 | 2.40E-63  | PRPH     |
| ANTXRL    | ENSG00000 | 0.01  | 26      | -4.741 | 7.76E-115 | CCSER2   |
| ANXA13    | ENSG00000 | 0.1   | 4.87    | -2.416 | 1.48E-24  | PAK6     |
| AP000281  | ENSG00000 | 0     | 4.01    | -2.325 | 7.76E-44  | SLC35G2  |
| AP000289  | ENSG00000 | 0     | 4.21    | -2.381 | 1.22E-48  | CHODL    |
| AP000345  | ENSG00000 | 0.08  | 12.84   | -3.68  | 9.22E-70  | AKAP3    |
| AP000432  | ENSG00000 | 0.23  | 4.04    | -2.035 | 1.33E-52  | KHDRBS3  |
| AP000442  | ENSG00000 | 0.64  | 10.5    | -2.81  | 1.37E-104 | MYLK3    |
| AP001048  | ENSG00000 | 0     | 9.55    | -3.399 | 3.20E-57  | HGFAC    |
| AP001062  | ENSG00000 | 0.68  | 6.57    | -2.172 | 5.79E-53  | POLI     |
| AP001425  | ENSG00000 | 0.03  | 3.82    | -2.226 | 7.08E-54  | CRYBG3   |
| AP001468  | ENSG00000 | 0     | 5.23    | -2.639 | 1.87E-47  | TPGS2    |
| AP001476  | ENSG00000 | 0.07  | 4.05    | -2.239 | 5.93E-73  | MRGBP    |
| AP001625  | ENSG00000 | 0     | 11.25   | -3.615 | 6.88E-65  | FAM46C   |
| AP001630  | ENSG00000 | 0     | 5       | -2.585 | 8.78E-61  | SNAP91   |
| AP003025  | ENSG00000 | 0     | 13.54   | -3.862 | 1.78E-63  | MBNL3    |
| AP003774  | ENSG00000 | 0     | 7.05    | -3.009 | 8.60E-58  | INPP4B   |
| AP004782  | ENSG00000 | 0.05  | 3.25    | -2.017 | 9.76E-76  | APPBP2   |
| AP005530  | ENSG00000 | 0.06  | 13.18   | -3.742 | 3.92E-62  | IPO5     |
| AP006216  | ENSG00000 | 0     | 4.29    | -2.403 | 1.71E-51  | GRB14    |
| APBB3     | ENSG00000 | 8.62  | 94      | -3.304 | 2.62E-115 | TPTE     |
| APH1B     | ENSG00000 | 7.69  | 295.947 | -5.095 | 1.31E-65  | SPAG4    |
| APITD1-CC | ENSG00000 | 1.76  | 22      | -3.059 | 8.88E-67  | ELP5     |
| APLF      | ENSG00000 | 0.94  | 7.04    | -2.051 | 7.25E-70  | TPP2     |
| APOA1     | ENSG00000 | 8.32  | 459.556 | -5.627 | 2.30E-24  | IQCG     |
| APOBEC4   | ENSG00000 | 0     | 8.47    | -3.243 | 6.46E-50  | RNF141   |
| APOD      | ENSG00000 | 18.42 | 91.74   | -2.256 | 4.64E-15  | MAP7     |
| APOM      | ENSG00000 | 2.02  | 20.73   | -2.847 | 2.86E-18  | INPP1    |
| APOPT1    | ENSG00000 | 34    | 148.384 | -2.094 | 3.70E-39  | GPX4     |
| APPBP2    | ENSG00000 | 5.5   | 33.261  | -2.398 | 1.83E-53  | TESC     |
| AQP11     | ENSG00000 | 1.5   | 11.42   | -2.313 | 4.78E-77  | DPY19L2P |
| AQP5      | ENSG00000 | 2.72  | 293.496 | -6.307 | 5.22E-66  | PVRL3    |
| AQP7      | ENSG00000 | 0.19  | 48.999  | -5.393 | 2.04E-111 | POMT1    |
| AREG      | ENSG00000 | 0.16  | 11.86   | -3.471 | 1.28E-74  | STAT4    |
| ARHGAP20  | ENSG00000 | 0.2   | 6.8     | -2.7   | 4.42E-95  | WT1      |
| ARHGAP22  | ENSG00000 | 0     | 8.14    | -3.192 | 2.54E-61  | TOMM34   |
| ARHGAP26  | ENSG00000 | 3.61  | 23.381  | -2.403 | 3.41E-61  | KCNH2    |
| ARHGAP26  | ENSG00000 | 0     | 10.05   | -3.466 | 1.00E-51  | CCDC53   |
| ARHGAP26  | ENSG00000 | 0     | 5.5     | -2.7   | 2.89E-52  | FBXL2    |
| ARHGAP28  | ENSG00000 | 6.48  | 52.991  | -2.852 | 6.35E-27  | ACE2     |
| ARHGAP35  | ENSG00000 | 8.92  | 134     | -3.766 | 2.12E-63  | CLEC16A  |
| ARHGAP39  | ENSG00000 | 5.36  | 28.391  | -2.208 | 3.03E-51  | GUCA1A   |

|          |          |       |         |        |          |          |
|----------|----------|-------|---------|--------|----------|----------|
| ARHGAP9  | ENSG0000 | 13.91 | 66.911  | -2.187 | 1.22E-29 | CCNJL    |
| ARHGEF33 | ENSG0000 | 1.48  | 13.58   | -2.556 | 2.13E-51 | CETN3    |
| ARHGEF37 | ENSG0000 | 0.25  | 5.02    | -2.268 | 8.78E-59 | IFT81    |
| ARHGEF7- | ENSG0000 | 0     | 4.27    | -2.398 | 4.80E-56 | PDE1A    |
| ARHGEF7- | ENSG0000 | 0     | 3.13    | -2.046 | 6.46E-62 | SCRG1    |
| ARL13A   | ENSG0000 | 0.06  | 13.99   | -3.822 | 2.34E-55 | ENOX1    |
| ARL2BPP3 | ENSG0000 | 0     | 13.25   | -3.833 | 5.01E-64 | PDZD2    |
| ARL4A    | ENSG0000 | 18.77 | 246.611 | -3.647 | 3.17E-56 | CALB2    |
| ARL6     | ENSG0000 | 1.95  | 11.28   | -2.058 | 4.37E-63 | WASF1    |
| ARL9     | ENSG0000 | 0.34  | 10      | -3.037 | 6.82E-61 | MLF1     |
| ARMC12   | ENSG0000 | 0.43  | 86.318  | -5.932 | 2.69E-90 | KLHDC10  |
| ARMC2    | ENSG0000 | 2.79  | 27.14   | -2.892 | 1.25E-72 | LPIN1    |
| ARMC3    | ENSG0000 | 0.33  | 33.819  | -4.71  | 8.13E-62 | GLUD2    |
| ARMC4    | ENSG0000 | 0.25  | 30.73   | -4.666 | 2.23E-67 | TEX11    |
| ARMS2    | ENSG0000 | 0.03  | 3.47    | -2.118 | 4.63E-47 | CUL9     |
| ARNT2    | ENSG0000 | 0.62  | 12.21   | -3.028 | 9.23E-42 | MAPK13   |
| ARNTL    | ENSG0000 | 3.25  | 19.73   | -2.286 | 8.80E-93 | SCCPDH   |
| ARRDC1-A | ENSG0000 | 6.03  | 30.399  | -2.159 | 1.01E-82 | MAMLD1   |
| ARRDC3-A | ENSG0000 | 0.58  | 9.11    | -2.678 | 5.75E-88 | SLC12A2  |
| ARRDC5   | ENSG0000 | 0.14  | 21.43   | -4.298 | 3.31E-63 | PRND     |
| ARSA     | ENSG0000 | 13.05 | 108.608 | -2.964 | 1.09E-57 | SCML1    |
| ART3     | ENSG0000 | 0.29  | 95.299  | -6.222 | 9.05E-99 | FOXG1    |
| ART5     | ENSG0000 | 4.98  | 31.65   | -2.449 | 4.22E-30 | CDKN3    |
| ASAP2    | ENSG0000 | 5.53  | 32.271  | -2.349 | 4.11E-26 | EFHC1    |
| ASB17    | ENSG0000 | 0     | 41.521  | -5.41  | 7.97E-67 | TCEAL2   |
| ASB5     | ENSG0000 | 0     | 7.63    | -3.109 | 2.12E-41 | PAQR3    |
| ASB9     | ENSG0000 | 1.39  | 32.28   | -3.8   | 7.89E-65 | CITED1   |
| ASGR1    | ENSG0000 | 2.04  | 38.109  | -3.685 | 2.38E-35 | NAALAD2  |
| ASIC3    | ENSG0000 | 11.05 | 54.78   | -2.211 | 1.02E-30 | ST6GALN4 |
| ASXL3    | ENSG0000 | 0.09  | 8.13    | -3.066 | 2.41E-58 | FOXD1    |
| ASZ1     | ENSG0000 | 0.09  | 13.22   | -3.706 | 1.88E-94 | SPHK2    |
| ATAD1    | ENSG0000 | 13.28 | 92.937  | -2.718 | 2.40E-53 | LRRC16A  |
| ATE1-AS1 | ENSG0000 | 0.28  | 4.94    | -2.214 | 2.06E-50 | HSPA2    |
| ATF7IP2  | ENSG0000 | 7.82  | 92.289  | -3.403 | 4.89E-86 | PMS1     |
| ATG4D    | ENSG0000 | 27.93 | 125.07  | -2.124 | 1.73E-49 | GOLGA8N  |
| ATG9B    | ENSG0000 | 8.23  | 44.47   | -2.3   | 2.73E-15 | MAGEA1   |
| ATL1     | ENSG0000 | 0.92  | 7.57    | -2.158 | 1.19E-38 | WDR62    |
| ATP10A   | ENSG0000 | 1.62  | 9.67    | -2.026 | 2.86E-57 | CYB5R4   |
| ATP1A2   | ENSG0000 | 0.28  | 7.47    | -2.726 | 1.71E-17 | BCL2L14  |
| ATP1A3   | ENSG0000 | 5.12  | 53.641  | -3.158 | 1.04E-35 | CYP26B1  |
| ATP1A4   | ENSG0000 | 0.44  | 27.77   | -4.32  | 2.65E-61 | USP25    |
| ATP5G1P1 | ENSG0000 | 0     | 7.43    | -3.076 | 1.43E-71 | LRRC6    |
| ATP6AP1L | ENSG0000 | 2.66  | 16.74   | -2.277 | 1.76E-64 | CCDC92   |
| ATP6V1E2 | ENSG0000 | 4.27  | 37.83   | -2.881 | 9.43E-49 | ME3      |
| ATP8A2   | ENSG0000 | 0.87  | 10.33   | -2.599 | 8.45E-53 | TTYH1    |
| ATP8B3   | ENSG0000 | 1.41  | 51.189  | -4.437 | 2.08E-69 | SLC6A1   |
| ATP8B5P  | ENSG0000 | 0.2   | 13.99   | -3.643 | 1.46E-77 | NDRG4    |
| ATRNL1   | ENSG0000 | 3.36  | 17.81   | -2.109 | 1.21E-36 | AZGP1    |
| ATXN3L   | ENSG0000 | 0     | 4.34    | -2.417 | 2.89E-56 | PENK     |

|            |           |       |         |        |          |          |
|------------|-----------|-------|---------|--------|----------|----------|
| AURKC      | ENSG00000 | 1.9   | 73.848  | -4.69  | 2.43E-77 | TCEA2    |
| AXDND1     | ENSG00000 | 0.56  | 41.04   | -4.752 | 3.76E-76 | IFT57    |
| AY269186.. | ENSG00000 | 0     | 3.87    | -2.284 | 9.33E-53 | CLK4     |
| AY269186.. | ENSG00000 | 0     | 3.94    | -2.305 | 1.47E-46 | GPR18    |
| AZGP1      | ENSG00000 | 0.14  | 43.822  | -5.297 | 1.60E-73 | BAZ2B    |
| AZIN1-AS1  | ENSG00000 | 1.64  | 57.059  | -4.459 | 4.40E-75 | INHBB    |
| AZIN2      | ENSG00000 | 2.7   | 73.17   | -4.325 | 1.41E-84 | RNF139   |
| B3GALT4    | ENSG00000 | 3.21  | 36.38   | -3.15  | 1.36E-60 | MAGEA11  |
| B4GALT1-1  | ENSG00000 | 0.71  | 22.59   | -3.786 | 2.13E-67 | BAZ1A    |
| B4GALT4-1  | ENSG00000 | 0     | 5.49    | -2.698 | 1.64E-47 | GSTM3    |
| B9D1       | ENSG00000 | 11.95 | 94.398  | -2.881 | 5.35E-47 | CAND2    |
| BAALC-AS1  | ENSG00000 | 1.16  | 10.88   | -2.459 | 1.08E-46 | MPC2     |
| BAG1       | ENSG00000 | 27.92 | 178.923 | -2.637 | 5.21E-61 | GLRX2    |
| BAG5       | ENSG00000 | 16.61 | 137.091 | -2.971 | 2.01E-41 | MYOM2    |
| BAHCC1     | ENSG00000 | 1.6   | 11.14   | -2.223 | 6.68E-28 | SPAG16   |
| BAIAP3     | ENSG00000 | 4.6   | 43.11   | -2.978 | 1.55E-43 | GULP1    |
| BANF2      | ENSG00000 | 0     | 140.808 | -7.148 | 4.97E-71 | DMRT1    |
| BAP1       | ENSG00000 | 41.06 | 196.596 | -2.232 | 7.01E-66 | ZCCHC2   |
| BAZ1A      | ENSG00000 | 7.31  | 40.61   | -2.324 | 2.42E-61 | KLK11    |
| BAZ2B      | ENSG00000 | 3.53  | 19.66   | -2.189 | 2.72E-40 | ISYNA1   |
| BBIP1      | ENSG00000 | 11.09 | 123.22  | -3.361 | 3.04E-77 | DAZL     |
| BBS1       | ENSG00000 | 5.79  | 28.729  | -2.13  | 5.02E-46 | RPL39L   |
| BBX        | ENSG00000 | 8.78  | 55.741  | -2.536 | 5.07E-58 | CYP17A1  |
| BCL2L14    | ENSG00000 | 1.58  | 44.409  | -4.138 | 2.81E-41 | SAR1B    |
| BCL2L2-PA  | ENSG00000 | 0.74  | 13.72   | -3.081 | 2.14E-55 | PPARGC1A |
| BCL6       | ENSG00000 | 3.38  | 26.67   | -2.659 | 1.94E-44 | ZNF516   |
| BCO2       | ENSG00000 | 0.63  | 11.49   | -2.938 | 5.02E-88 | EPB41L3  |
| BCRP2      | ENSG00000 | 1.51  | 26.21   | -3.438 | 1.44E-76 | SEC61A2  |
| BCRP3      | ENSG00000 | 7.21  | 33.889  | -2.087 | 1.89E-13 | TMX4     |
| BEAN1      | ENSG00000 | 0.61  | 8.86    | -2.615 | 8.83E-63 | NXF3     |
| BEND2      | ENSG00000 | 0.01  | 3.6     | -2.187 | 2.65E-89 | ACAT1    |
| BEND7      | ENSG00000 | 4.44  | 35.36   | -2.741 | 1.59E-63 | SPATA20  |
| BEST1      | ENSG00000 | 0.9   | 12.44   | -2.822 | 6.22E-87 | MICAL2   |
| BEST3      | ENSG00000 | 0.04  | 3.82    | -2.212 | 1.64E-57 | HSD17B3  |
| BEX1       | ENSG00000 | 14    | 112.813 | -2.924 | 2.06E-24 | DAAM2    |
| BEX5       | ENSG00000 | 2.44  | 15.65   | -2.275 | 1.73E-29 | SH3GL2   |
| BHMG1      | ENSG00000 | 0.36  | 9.45    | -2.942 | 6.66E-64 | KLK5     |
| BIRC8      | ENSG00000 | 0     | 9.78    | -3.43  | 5.39E-65 | IL13RA2  |
| BMP7-AS1   | ENSG00000 | 0     | 3.72    | -2.239 | 4.42E-43 | P4HTM    |
| BMPR1B-A   | ENSG00000 | 0     | 12.94   | -3.801 | 2.24E-63 | STX8     |
| BNIPL      | ENSG00000 | 0.38  | 7.07    | -2.548 | 7.49E-41 | OPTN     |
| BOD1L2     | ENSG00000 | 0.06  | 341.631 | -8.336 | 8.01E-84 | DACH1    |
| BOLL       | ENSG00000 | 0.07  | 78.188  | -6.21  | 2.74E-87 | LZTFL1   |
| BPI        | ENSG00000 | 0.46  | 32.981  | -4.541 | 1.42E-71 | LRRN3    |
| BPIFA3     | ENSG00000 | 0     | 133.564 | -7.072 | 1.42E-73 | TKTL1    |
| BPIFB1     | ENSG00000 | 0.03  | 6.63    | -2.889 | 1.61E-28 | PRKCZ    |
| BRAP       | ENSG00000 | 19.54 | 85.603  | -2.076 | 1.38E-37 | C16orf45 |
| BRDT       | ENSG00000 | 9.78  | 82.229  | -2.949 | 1.84E-28 | REEP1    |
| BRICD5     | ENSG00000 | 5.4   | 36.859  | -2.565 | 7.73E-78 | GATM     |

|            |           |        |         |        |          |          |
|------------|-----------|--------|---------|--------|----------|----------|
| BRINP2     | ENSG00000 | 0.15   | 3.66    | -2.019 | 2.63E-40 | SERPINA5 |
| BRINP3     | ENSG00000 | 0.04   | 5.5     | -2.644 | 1.03E-37 | SLC27A6  |
| BRSK2      | ENSG00000 | 1.62   | 21.739  | -3.118 | 6.16E-60 | PPFIBP2  |
| BRWD1-AS1  | ENSG00000 | 0.03   | 3.19    | -2.024 | 2.06E-54 | GSTA1    |
| BRWD1-AS2  | ENSG00000 | 0.61   | 50.741  | -5.006 | 4.53E-77 | BBX      |
| BSCL2      | ENSG00000 | 36.911 | 359.213 | -3.248 | 2.99E-59 | CENPU    |
| BSN-AS2    | ENSG00000 | 0.16   | 6.09    | -2.612 | 3.80E-65 | ARNT2    |
| BSNDP2     | ENSG00000 | 0      | 3.04    | -2.014 | 1.17E-33 | ELAVL4   |
| BTBD16     | ENSG00000 | 0.02   | 10.33   | -3.474 | 5.58E-60 | PRKCDBP  |
| BTBD6      | ENSG00000 | 20.45  | 101.75  | -2.26  | 1.42E-56 | JAM2     |
| BTBD9-AS1  | ENSG00000 | 0      | 6.57    | -2.92  | 1.12E-64 | OSR2     |
| BTG4       | ENSG00000 | 0.09   | 23.821  | -4.509 | 2.83E-82 | MAGEA4   |
| BTNL8      | ENSG00000 | 0.12   | 7.92    | -2.994 | 1.57E-67 | KRT23    |
| BTNL9      | ENSG00000 | 2.51   | 13.27   | -2.023 | 2.47E-36 | ZBTB38   |
| BVES       | ENSG00000 | 1.43   | 9.13    | -2.06  | 3.89E-44 | ASAP2    |
| BVES-AS1   | ENSG00000 | 0.27   | 12.79   | -3.441 | 3.99E-70 | TUBA4A   |
| BX255923.1 | ENSG00000 | 0.22   | 101.983 | -6.399 | 1.84E-68 | ALDH1A1  |
| BZW1P2     | ENSG00000 | 10.21  | 43.919  | -2.002 | 1.32E-20 | CEP70    |
| C10orf107  | ENSG00000 | 0.07   | 9.51    | -3.296 | 2.93E-57 | TNFAIP6  |
| C10orf120  | ENSG00000 | 0      | 37.021  | -5.249 | 2.24E-66 | PTGDS    |
| C10orf53   | ENSG00000 | 0      | 50.32   | -5.681 | 1.48E-74 | INSL3    |
| C10orf55   | ENSG00000 | 0.15   | 15.93   | -3.88  | 2.07E-55 | CNN1     |
| C10orf62   | ENSG00000 | 0      | 358.367 | -8.489 | 1.27E-77 | NEFM     |
| C10orf67   | ENSG00000 | 0.16   | 9.4     | -3.164 | 4.61E-72 | CPE      |
| C10orf82   | ENSG00000 | 2.5    | 124.862 | -5.168 | 1.16E-58 | SMARCA1  |
| C10orf88   | ENSG00000 | 4.45   | 25.621  | -2.288 | 1.24E-58 | PLK2     |
| C10orf90   | ENSG00000 | 0.04   | 9.2     | -3.294 | 1.20E-54 | CLU      |
| C11orf16   | ENSG00000 | 0.14   | 4.02    | -2.139 | 2.41E-41 | PLA2G16  |
| C11orf42   | ENSG00000 | 0.04   | 32.159  | -4.995 | 6.37E-63 | TIPARP   |
| C11orf53   | ENSG00000 | 0.02   | 6.38    | -2.855 | 9.82E-58 | TSPYL5   |
| C11orf63   | ENSG00000 | 0.79   | 25.72   | -3.9   | 9.64E-79 | SOX9     |
| C11orf65   | ENSG00000 | 0.91   | 55.811  | -4.895 | 1.71E-71 | KIF5C    |
| C11orf70   | ENSG00000 | 1.1    | 44.12   | -4.425 | 1.73E-82 | MAGEA12  |
| C11orf71   | ENSG00000 | 3.4    | 148.219 | -5.084 | 5.49E-85 | HOPX     |
| C11orf85   | ENSG00000 | 0.57   | 33.18   | -4.444 | 3.21E-76 | ZBTB20   |
| C11orf88   | ENSG00000 | 0.05   | 35.49   | -5.119 | 3.91E-60 | HMGCS2   |
| C11orf91   | ENSG00000 | 0.05   | 13.05   | -3.742 | 1.21E-79 | CKM      |
| C11orf94   | ENSG00000 | 0.1    | 74.258  | -6.096 | 7.80E-75 | STAR     |
| C11orf96   | ENSG00000 | 7.29   | 77.219  | -3.238 | 2.45E-48 | ABCA8    |
| C11orf97   | ENSG00000 | 0      | 25.05   | -4.703 | 3.12E-72 | FHL1     |
| C12orf42   | ENSG00000 | 0.16   | 36.559  | -5.017 | 1.10E-66 | SPOCK1   |
| C12orf50   | ENSG00000 | 0.03   | 61.571  | -5.925 | 3.57E-75 | LIPG     |
| C12orf54   | ENSG00000 | 0.11   | 101.398 | -6.527 | 3.46E-69 | MAGEA6   |
| C12orf60   | ENSG00000 | 3.35   | 19.311  | -2.223 | 4.35E-33 | CADM1    |
| C12orf71   | ENSG00000 | 0.18   | 4.03    | -2.092 | 2.09E-41 | MOK      |
| C12orf80   | ENSG00000 | 0      | 8.81    | -3.294 | 2.70E-59 | PFKP     |
| C14orf39   | ENSG00000 | 0.64   | 6.94    | -2.275 | 1.20E-51 | CYP11A1  |
| C14orf79   | ENSG00000 | 5.66   | 44.01   | -2.757 | 5.68E-63 | CST3     |
| C15orf26   | ENSG00000 | 0.25   | 6.58    | -2.6   | 3.41E-58 | DDAH1    |

|           |          |        |         |        |           |          |
|-----------|----------|--------|---------|--------|-----------|----------|
| C15orf39  | ENSG0000 | 21.491 | 96.268  | -2.113 | 4.30E-46  | SERPINF1 |
| C15orf43  | ENSG0000 | 0.08   | 18.45   | -4.171 | 1.55E-66  | APOA1    |
| C15orf48  | ENSG0000 | 10.24  | 129.948 | -3.542 | 6.17E-33  | BEX1     |
| C15orf52  | ENSG0000 | 0.71   | 13.18   | -3.052 | 7.17E-64  |          |
| C15orf59  | ENSG0000 | 0.64   | 15.06   | -3.292 | 1.43E-40  |          |
| C15orf61  | ENSG0000 | 3.63   | 28.34   | -2.664 | 1.70E-44  |          |
| C15orf65  | ENSG0000 | 2.33   | 12.85   | -2.056 | 2.79E-26  |          |
| C16orf45  | ENSG0000 | 11.25  | 68.869  | -2.512 | 2.49E-48  |          |
| C16orf46  | ENSG0000 | 0.99   | 12.49   | -2.761 | 6.53E-62  |          |
| C16orf71  | ENSG0000 | 0.69   | 97.099  | -5.859 | 2.38E-81  |          |
| C16orf78  | ENSG0000 | 0      | 55.299  | -5.815 | 8.78E-59  |          |
| C16orf82  | ENSG0000 | 0.01   | 356.954 | -8.469 | 1.71E-76  |          |
| C16orf86  | ENSG0000 | 1.55   | 64.61   | -4.685 | 1.44E-100 |          |
| C16orf90  | ENSG0000 | 0.04   | 62.318  | -5.928 | 6.20E-81  |          |
| C16orf92  | ENSG0000 | 0      | 26.75   | -4.794 | 3.66E-66  |          |
| C16orf93  | ENSG0000 | 3.51   | 66.879  | -3.912 | 1.43E-78  |          |
| C16orf95  | ENSG0000 | 2.57   | 170     | -5.582 | 4.85E-77  |          |
| C16orf96  | ENSG0000 | 0.31   | 13.83   | -3.501 | 3.53E-66  |          |
| C16orf97  | ENSG0000 | 0      | 11.7    | -3.667 | 2.83E-60  |          |
| C17orf104 | ENSG0000 | 0.87   | 40.229  | -4.463 | 1.84E-76  |          |
| C17orf105 | ENSG0000 | 0.03   | 61.252  | -5.917 | 7.70E-71  |          |
| C17orf112 | ENSG0000 | 0      | 11.59   | -3.654 | 4.47E-59  |          |
| C17orf47  | ENSG0000 | 0.02   | 7.3     | -3.025 | 2.60E-59  |          |
| C17orf50  | ENSG0000 | 0.08   | 137.414 | -7.002 | 2.95E-77  |          |
| C17orf64  | ENSG0000 | 0.27   | 169.236 | -7.067 | 3.13E-84  |          |
| C17orf74  | ENSG0000 | 0.19   | 167.369 | -7.145 | 3.13E-69  |          |
| C17orf97  | ENSG0000 | 2.58   | 103.658 | -4.87  | 1.34E-65  |          |
| C17orf98  | ENSG0000 | 0.06   | 24.62   | -4.595 | 4.13E-66  |          |
| C18orf63  | ENSG0000 | 0      | 4.67    | -2.503 | 5.81E-79  |          |
| C19orf18  | ENSG0000 | 1.06   | 15.02   | -2.959 | 4.21E-58  |          |
| C19orf38  | ENSG0000 | 2.54   | 14.71   | -2.15  | 4.52E-50  |          |
| C19orf44  | ENSG0000 | 4.5    | 23.18   | -2.136 | 3.24E-61  |          |
| C19orf45  | ENSG0000 | 0.65   | 37.01   | -4.526 | 2.15E-60  |          |
| C19orf47  | ENSG0000 | 12.4   | 54.198  | -2.042 | 5.03E-53  |          |
| C19orf57  | ENSG0000 | 3.18   | 28.259  | -2.807 | 1.46E-62  |          |
| C19orf67  | ENSG0000 | 0.27   | 9.55    | -3.054 | 5.25E-55  |          |
| C19orf71  | ENSG0000 | 0.97   | 68.251  | -5.136 | 9.73E-77  |          |
| C19orf81  | ENSG0000 | 1.76   | 10.61   | -2.073 | 4.50E-39  |          |
| C19orf84  | ENSG0000 | 3.74   | 29.449  | -2.683 | 6.18E-42  |          |
| C1GALT1C  | ENSG0000 | 0.6    | 7.35    | -2.384 | 2.66E-69  |          |
| C1orf100  | ENSG0000 | 0.15   | 72.66   | -6.001 | 7.20E-66  |          |
| C1orf101  | ENSG0000 | 0.4    | 19.231  | -3.853 | 6.44E-77  |          |
| C1orf105  | ENSG0000 | 0.27   | 34.63   | -4.81  | 3.19E-64  |          |
| C1orf111  | ENSG0000 | 0      | 72.998  | -6.209 | 4.08E-70  |          |
| C1orf141  | ENSG0000 | 0.02   | 11.07   | -3.565 | 1.08E-99  |          |
| C1orf146  | ENSG0000 | 0.2    | 5.36    | -2.406 | 1.41E-59  |          |
| C1orf158  | ENSG0000 | 0.01   | 61.349  | -5.948 | 7.92E-69  |          |
| C1orf159  | ENSG0000 | 8.34   | 59.128  | -2.687 | 2.21E-76  |          |
| C1orf167  | ENSG0000 | 0.55   | 52.921  | -5.121 | 6.77E-81  |          |



|            |           |      |         |        |          |
|------------|-----------|------|---------|--------|----------|
| C1orf168   | ENSG00000 | 0.04 | 3.21    | -2.017 | 2.32E-21 |
| C1orf177   | ENSG00000 | 0.03 | 5.68    | -2.697 | 8.64E-54 |
| C1orf185   | ENSG00000 | 0    | 28.699  | -4.892 | 4.18E-62 |
| C1orf189   | ENSG00000 | 0    | 26.661  | -4.79  | 9.88E-64 |
| C1orf194   | ENSG00000 | 0.2  | 393.575 | -8.361 | 5.49E-72 |
| C1orf228   | ENSG00000 | 3.42 | 36.249  | -3.075 | 1.86E-42 |
| C1orf234   | ENSG00000 | 0.1  | 101.581 | -6.543 | 8.12E-72 |
| C1orf56    | ENSG00000 | 5.06 | 134.708 | -4.485 | 1.23E-74 |
| C1orf61    | ENSG00000 | 0.86 | 48.311  | -4.729 | 7.92E-49 |
| C1orf87    | ENSG00000 | 0.01 | 20.15   | -4.388 | 1.05E-62 |
| C1orf94    | ENSG00000 | 0.11 | 24.19   | -4.504 | 5.28E-71 |
| C1QTNF3    | ENSG00000 | 0.75 | 33.861  | -4.316 | 1.77E-53 |
| C1QTNF3-   | ENSG00000 | 0.06 | 3.71    | -2.152 | 2.71E-85 |
| C1QTNF9B   | ENSG00000 | 0.39 | 6.03    | -2.338 | 2.32E-51 |
| C1QTNF9B   | ENSG00000 | 1.57 | 44.191  | -4.136 | 3.98E-61 |
| C20orf141  | ENSG00000 | 0.08 | 173.946 | -7.34  | 1.22E-73 |
| C20orf144  | ENSG00000 | 0.09 | 234.866 | -7.757 | 3.00E-78 |
| C20orf173  | ENSG00000 | 0    | 44.329  | -5.502 | 2.37E-69 |
| C20orf187  | ENSG00000 | 0    | 4.06    | -2.339 | 1.78E-41 |
| C20orf195  | ENSG00000 | 0.39 | 144.918 | -6.714 | 8.59E-73 |
| C20orf62   | ENSG00000 | 0    | 4.93    | -2.568 | 2.57E-49 |
| C20orf78   | ENSG00000 | 0    | 7.36    | -3.064 | 5.35E-61 |
| C20orf85   | ENSG00000 | 0.12 | 102.778 | -6.534 | 1.54E-66 |
| C20orf96   | ENSG00000 | 3.16 | 39.01   | -3.266 | 1.30E-60 |
| C21orf62-  | ENSG00000 | 0.32 | 7.87    | -2.748 | 8.32E-66 |
| C22orf15   | ENSG00000 | 0.16 | 7.22    | -2.825 | 1.36E-55 |
| C22orf23   | ENSG00000 | 0.99 | 117.677 | -5.898 | 3.09E-71 |
| C22orf31   | ENSG00000 | 0.03 | 10.06   | -3.425 | 2.80E-78 |
| C22orf42   | ENSG00000 | 0.21 | 21.099  | -4.191 | 4.35E-60 |
| C2orf16    | ENSG00000 | 0.25 | 24.55   | -4.353 | 2.41E-69 |
| C2orf27A   | ENSG00000 | 1.15 | 9.82    | -2.331 | 4.42E-88 |
| C2orf27AP: | ENSG00000 | 0.28 | 7.56    | -2.741 | 1.24E-68 |
| C2orf40    | ENSG00000 | 0.44 | 64.771  | -5.513 | 2.39E-56 |
| C2orf42    | ENSG00000 | 8.09 | 55.341  | -2.632 | 2.72E-59 |
| C2orf57    | ENSG00000 | 0    | 195.591 | -7.619 | 1.12E-72 |
| C2orf61    | ENSG00000 | 0.05 | 17.75   | -4.158 | 1.93E-62 |
| C2orf70    | ENSG00000 | 0.06 | 39.681  | -5.262 | 1.33E-69 |
| C2orf73    | ENSG00000 | 0.06 | 57.098  | -5.776 | 1.46E-71 |
| C2orf78    | ENSG00000 | 0    | 14.58   | -3.962 | 1.54E-84 |
| C2orf81    | ENSG00000 | 3.05 | 34.379  | -3.127 | 4.14E-55 |
| C2orf82    | ENSG00000 | 1.35 | 14.65   | -2.735 | 1.89E-45 |
| C2orf88    | ENSG00000 | 1.12 | 92.937  | -5.47  | 1.54E-76 |
| C3orf18    | ENSG00000 | 4.93 | 30.89   | -2.427 | 1.65E-53 |
| C3orf20    | ENSG00000 | 0.01 | 7.78    | -3.12  | 2.64E-53 |
| C3orf22    | ENSG00000 | 0.02 | 65.662  | -6.03  | 1.11E-69 |
| C3orf30    | ENSG00000 | 0    | 93.687  | -6.565 | 1.58E-73 |
| C3orf62    | ENSG00000 | 4.41 | 26.319  | -2.336 | 7.11E-59 |
| C3orf67    | ENSG00000 | 5.81 | 38.51   | -2.536 | 1.12E-38 |
| C3orf84    | ENSG00000 | 0    | 9.38    | -3.376 | 3.02E-59 |

|            |           |        |         |        |           |
|------------|-----------|--------|---------|--------|-----------|
| C4orf17    | ENSG0000I | 0      | 18.9    | -4.315 | 7.32E-62  |
| C4orf22    | ENSG0000I | 0      | 36.78   | -5.24  | 9.64E-76  |
| C4orf36    | ENSG0000I | 1.59   | 19.86   | -3.01  | 3.96E-53  |
| C4orf45    | ENSG0000I | 0      | 16.59   | -4.137 | 1.68E-64  |
| C4orf47    | ENSG0000I | 1.55   | 21.891  | -3.166 | 1.91E-43  |
| C4orf48    | ENSG0000I | 16.381 | 68.75   | -2.005 | 2.56E-28  |
| C4orf51    | ENSG0000I | 0.47   | 9.52    | -2.839 | 5.83E-25  |
| C5orf46    | ENSG0000I | 0.39   | 22.59   | -4.085 | 2.18E-55  |
| C5orf47    | ENSG0000I | 0.12   | 21.97   | -4.358 | 5.02E-88  |
| C5orf49    | ENSG0000I | 0.23   | 47.589  | -5.304 | 6.54E-63  |
| C5orf52    | ENSG0000I | 0      | 45.48   | -5.539 | 6.76E-74  |
| C5orf58    | ENSG0000I | 5.32   | 180.818 | -4.846 | 2.95E-54  |
| C5orf60    | ENSG0000I | 0.3    | 52.37   | -5.359 | 1.97E-66  |
| C5orf63    | ENSG0000I | 1.34   | 16.35   | -2.89  | 4.82E-104 |
| C6         | ENSG0000I | 0.16   | 4.25    | -2.178 | 1.41E-30  |
| C6orf10    | ENSG0000I | 0.25   | 42.479  | -5.12  | 2.56E-56  |
| C6orf118   | ENSG0000I | 0.08   | 16.64   | -4.03  | 1.63E-54  |
| C6orf141   | ENSG0000I | 0.47   | 9.44    | -2.828 | 1.21E-56  |
| C6orf163   | ENSG0000I | 2.24   | 14.98   | -2.302 | 3.47E-30  |
| C6orf165   | ENSG0000I | 0.26   | 39.711  | -5.014 | 1.14E-62  |
| C6orf201   | ENSG0000I | 0.13   | 76.781  | -6.105 | 1.57E-81  |
| C6orf229   | ENSG0000I | 0      | 15.22   | -4.02  | 6.22E-56  |
| C6orf52    | ENSG0000I | 2.69   | 18.699  | -2.416 | 5.90E-38  |
| C6orf99    | ENSG0000I | 0.93   | 153.819 | -6.326 | 1.64E-79  |
| C7orf31    | ENSG0000I | 8.19   | 67.349  | -2.895 | 1.52E-32  |
| C7orf34    | ENSG0000I | 0.05   | 86.647  | -6.383 | 3.25E-92  |
| C7orf55    | ENSG0000I | 34.779 | 201.885 | -2.503 | 7.50E-41  |
| C7orf61    | ENSG0000I | 0.37   | 88.923  | -6.036 | 4.04E-87  |
| C7orf62    | ENSG0000I | 0      | 27.34   | -4.825 | 2.59E-66  |
| C7orf66    | ENSG0000I | 0      | 3.09    | -2.032 | 4.59E-41  |
| C7orf71    | ENSG0000I | 0.01   | 4.76    | -2.512 | 1.05E-63  |
| C7orf72    | ENSG0000I | 0      | 3.71    | -2.236 | 1.17E-48  |
| C8orf48    | ENSG0000I | 0.7    | 7.81    | -2.374 | 1.35E-60  |
| C8orf74    | ENSG0000I | 0      | 23.9    | -4.638 | 1.50E-65  |
| C8orf88    | ENSG0000I | 7.29   | 101.342 | -3.626 | 2.88E-72  |
| C8orf89    | ENSG0000I | 0.17   | 9.85    | -3.213 | 2.21E-61  |
| C9orf116   | ENSG0000I | 3.39   | 84.442  | -4.283 | 8.13E-62  |
| C9orf117   | ENSG0000I | 0.46   | 32.5    | -4.52  | 1.61E-75  |
| C9orf131   | ENSG0000I | 0.08   | 45.49   | -5.428 | 1.82E-67  |
| C9orf135-1 | ENSG0000I | 0.07   | 38.22   | -5.196 | 1.34E-67  |
| C9orf153   | ENSG0000I | 0.04   | 15.36   | -3.976 | 7.76E-61  |
| C9orf171   | ENSG0000I | 0.07   | 26.031  | -4.659 | 4.55E-69  |
| C9orf172   | ENSG0000I | 1.01   | 7.5     | -2.08  | 3.82E-60  |
| C9orf173   | ENSG0000I | 0.22   | 92.609  | -6.262 | 1.02E-94  |
| C9orf173-1 | ENSG0000I | 0.18   | 10.38   | -3.27  | 1.66E-97  |
| C9orf24    | ENSG0000I | 0.44   | 142.982 | -6.644 | 4.80E-59  |
| C9orf43    | ENSG0000I | 0.81   | 56.539  | -4.99  | 4.25E-88  |
| C9orf50    | ENSG0000I | 0.08   | 10.55   | -3.419 | 1.56E-54  |
| C9orf57    | ENSG0000I | 0      | 16.65   | -4.142 | 9.08E-62  |

|           |           |         |         |        |           |
|-----------|-----------|---------|---------|--------|-----------|
| C9orf84   | ENSG00000 | 0.16    | 11.79   | -3.463 | 7.96E-112 |
| C9orf9    | ENSG00000 | 2.79    | 163.482 | -5.44  | 2.74E-85  |
| CA10      | ENSG00000 | 0.09    | 19.24   | -4.215 | 2.97E-59  |
| CA5B      | ENSG00000 | 1.7     | 9.87    | -2.009 | 2.80E-58  |
| CA8       | ENSG00000 | 0.94    | 13.11   | -2.863 | 1.44E-73  |
| CA9       | ENSG00000 | 2.25    | 35.7    | -3.497 | 6.35E-38  |
| CAB39L    | ENSG00000 | 2.36    | 25.189  | -2.962 | 4.24E-69  |
| CABLES2   | ENSG00000 | 2.24    | 39.921  | -3.659 | 1.06E-69  |
| CABS1     | ENSG00000 | 0.02    | 128.479 | -6.988 | 2.25E-67  |
| CABYR     | ENSG00000 | 17.47   | 401.316 | -4.445 | 3.94E-41  |
| CACNA1A   | ENSG00000 | 0.77    | 6.59    | -2.1   | 3.14E-46  |
| CACNA1C   | ENSG00000 | 1.14    | 16.23   | -3.009 | 3.54E-29  |
| CACNA1C-1 | ENSG00000 | 0       | 5.73    | -2.751 | 3.44E-59  |
| CACNA1H   | ENSG00000 | 6.14    | 44.659  | -2.677 | 1.17E-58  |
| CACNA2D4  | ENSG00000 | 1.81    | 15.7    | -2.571 | 2.68E-51  |
| CADM1     | ENSG00000 | 6.91    | 50.59   | -2.705 | 4.66E-39  |
| CADPS     | ENSG00000 | 0.59    | 7.75    | -2.46  | 3.11E-19  |
| CAGE1     | ENSG00000 | 0.03    | 7.57    | -3.057 | 5.88E-60  |
| CAHM      | ENSG00000 | 0.95    | 13.58   | -2.902 | 1.58E-101 |
| CALB2     | ENSG00000 | 1.24    | 8.57    | -2.095 | 6.48E-18  |
| CALCOCO1  | ENSG00000 | 17.111  | 83.678  | -2.225 | 1.50E-54  |
| CALCOCO2  | ENSG00000 | 32.45   | 168.72  | -2.343 | 2.81E-57  |
| CALR3     | ENSG00000 | 0.15    | 85.07   | -6.226 | 2.91E-82  |
| CALY      | ENSG00000 | 0.98    | 11.2    | -2.623 | 1.13E-50  |
| CAMK1     | ENSG00000 | 9.45    | 45.8    | -2.163 | 4.36E-44  |
| CAMK4     | ENSG00000 | 1.4     | 53.66   | -4.509 | 5.54E-57  |
| CAMKK1    | ENSG00000 | 2.25    | 12.48   | -2.052 | 1.83E-58  |
| CAND2     | ENSG00000 | 3.55    | 21.63   | -2.314 | 4.03E-70  |
| CAPN11    | ENSG00000 | 0.29    | 44.43   | -5.138 | 6.19E-72  |
| CAPN3     | ENSG00000 | 3.63    | 78.01   | -4.093 | 1.18E-87  |
| CAPS2     | ENSG00000 | 0.74    | 8.56    | -2.458 | 6.53E-91  |
| CAPSL     | ENSG00000 | 0       | 11.04   | -3.59  | 2.55E-49  |
| CAPZA3    | ENSG00000 | 0       | 226.944 | -7.833 | 2.29E-74  |
| CARF      | ENSG00000 | 0.9     | 9.1     | -2.41  | 2.91E-69  |
| CARHSP1   | ENSG00000 | 112.891 | 579.071 | -2.349 | 4.00E-33  |
| CARTPT    | ENSG00000 | 0       | 16.01   | -4.088 | 2.35E-53  |
| CASC1     | ENSG00000 | 1.19    | 21.86   | -3.384 | 1.69E-56  |
| CASC16    | ENSG00000 | 0       | 25.64   | -4.736 | 3.74E-65  |
| CASC2     | ENSG00000 | 0.53    | 11.41   | -3.02  | 2.82E-80  |
| CASC22    | ENSG00000 | 0       | 11.71   | -3.668 | 2.11E-59  |
| CASC23    | ENSG00000 | 0       | 10.68   | -3.546 | 2.73E-59  |
| CASQ1     | ENSG00000 | 0.92    | 7.93    | -2.218 | 7.00E-30  |
| CAST      | ENSG00000 | 17.75   | 125.931 | -2.759 | 3.23E-57  |
| CATIP     | ENSG00000 | 0.46    | 10.72   | -3.005 | 1.33E-59  |
| CATSPER1  | ENSG00000 | 0.29    | 26.58   | -4.418 | 1.19E-61  |
| CATSPER2  | ENSG00000 | 1.12    | 51.339  | -4.626 | 2.49E-116 |
| CATSPER2I | ENSG00000 | 0.94    | 17.019  | -3.215 | 8.01E-84  |
| CATSPER3  | ENSG00000 | 0.8     | 38.799  | -4.467 | 2.07E-54  |
| CATSPER4  | ENSG00000 | 0.08    | 16.731  | -4.037 | 2.95E-64  |

|          |           |      |         |        |           |
|----------|-----------|------|---------|--------|-----------|
| CATSPERD | ENSG00000 | 0.12 | 28.46   | -4.717 | 1.19E-70  |
| CATSPERG | ENSG00000 | 3.58 | 112.259 | -4.628 | 6.66E-66  |
| CBLN1    | ENSG00000 | 3.58 | 39.62   | -3.149 | 7.61E-50  |
| CBY3     | ENSG00000 | 0.17 | 19.821  | -4.153 | 1.60E-68  |
| CC2D2B   | ENSG00000 | 0.14 | 5.58    | -2.529 | 5.53E-59  |
| CCDC102B | ENSG00000 | 2.7  | 16.33   | -2.228 | 8.00E-36  |
| CCDC103  | ENSG00000 | 0.53 | 32.73   | -4.462 | 5.22E-61  |
| CCDC105  | ENSG00000 | 0    | 20.959  | -4.457 | 1.89E-62  |
| CCDC108  | ENSG00000 | 0.33 | 23.02   | -4.175 | 1.31E-68  |
| CCDC110  | ENSG00000 | 0.35 | 67.162  | -5.658 | 6.60E-80  |
| CCDC113  | ENSG00000 | 1.99 | 19.53   | -2.78  | 2.72E-55  |
| CCDC114  | ENSG00000 | 0.68 | 61.141  | -5.209 | 1.30E-85  |
| CCDC116  | ENSG00000 | 0.11 | 38.529  | -5.154 | 5.04E-84  |
| CCDC121  | ENSG00000 | 2.56 | 28.249  | -3.038 | 2.16E-55  |
| CCDC126  | ENSG00000 | 7.91 | 53.02   | -2.6   | 5.71E-42  |
| CCDC13   | ENSG00000 | 0.44 | 12.41   | -3.219 | 1.07E-79  |
| CCDC136  | ENSG00000 | 9.86 | 355.596 | -5.037 | 2.03E-65  |
| CCDC144  | ENSG00000 | 3.54 | 18.47   | -2.1   | 2.43E-16  |
| CCDC146  | ENSG00000 | 1.52 | 37.281  | -3.925 | 1.13E-80  |
| CCDC148  | ENSG00000 | 0.52 | 5.81    | -2.164 | 6.38E-51  |
| CCDC15   | ENSG00000 | 1.25 | 15.06   | -2.835 | 1.19E-67  |
| CCDC150  | ENSG00000 | 7.84 | 38.18   | -2.148 | 1.22E-33  |
| CCDC151  | ENSG00000 | 1.81 | 16.71   | -2.656 | 5.74E-59  |
| CCDC153  | ENSG00000 | 0.99 | 10.32   | -2.508 | 7.67E-54  |
| CCDC154  | ENSG00000 | 0.73 | 20.78   | -3.654 | 2.52E-87  |
| CCDC155  | ENSG00000 | 0.88 | 95.63   | -5.684 | 1.12E-81  |
| CCDC157  | ENSG00000 | 2.8  | 49.6    | -3.735 | 4.86E-73  |
| CCDC158  | ENSG00000 | 0.02 | 33.21   | -5.068 | 3.26E-89  |
| CCDC159  | ENSG00000 | 9.85 | 112.813 | -3.391 | 2.08E-77  |
| CCDC166  | ENSG00000 | 0    | 5.33    | -2.662 | 1.93E-56  |
| CCDC168  | ENSG00000 | 0    | 9.98    | -3.457 | 3.85E-54  |
| CCDC169  | ENSG00000 | 1.74 | 116.629 | -5.424 | 6.30E-66  |
| CCDC170  | ENSG00000 | 0.25 | 5       | -2.263 | 8.63E-36  |
| CCDC171  | ENSG00000 | 2.25 | 30.099  | -3.258 | 2.41E-52  |
| CCDC172  | ENSG00000 | 1.3  | 16.82   | -2.954 | 1.59E-53  |
| CCDC173  | ENSG00000 | 0.34 | 71.169  | -5.751 | 8.46E-78  |
| CCDC175  | ENSG00000 | 0.04 | 3.34    | -2.061 | 1.37E-68  |
| CCDC176  | ENSG00000 | 1.84 | 32.251  | -3.549 | 1.74E-72  |
| CCDC178  | ENSG00000 | 0.52 | 13.67   | -3.271 | 1.09E-74  |
| CCDC179  | ENSG00000 | 0    | 29.229  | -4.918 | 2.75E-65  |
| CCDC180  | ENSG00000 | 1.1  | 50.011  | -4.602 | 1.52E-107 |
| CCDC181  | ENSG00000 | 2.37 | 33.669  | -3.363 | 4.97E-52  |
| CCDC182  | ENSG00000 | 0    | 36.859  | -5.243 | 2.03E-69  |
| CCDC183  | ENSG00000 | 0.56 | 69.42   | -5.496 | 1.65E-98  |
| CCDC183- | ENSG00000 | 0.33 | 6.41    | -2.478 | 1.11E-79  |
| CCDC184  | ENSG00000 | 0.69 | 7.92    | -2.4   | 1.15E-49  |
| CCDC185  | ENSG00000 | 0    | 45.54   | -5.54  | 1.83E-66  |
| CCDC186  | ENSG00000 | 2.59 | 13.97   | -2.06  | 2.64E-62  |
| CCDC24   | ENSG00000 | 6.9  | 55.598  | -2.841 | 3.86E-70  |

|          |           |        |         |        |           |
|----------|-----------|--------|---------|--------|-----------|
| CCDC27   | ENSG00000 | 0.01   | 24      | -4.629 | 4.77E-66  |
| CCDC28B  | ENSG00000 | 8.82   | 44.359  | -2.208 | 1.76E-43  |
| CCDC30   | ENSG00000 | 0.72   | 19.67   | -3.587 | 3.30E-79  |
| CCDC33   | ENSG00000 | 0.07   | 28.58   | -4.789 | 2.75E-60  |
| CCDC34   | ENSG00000 | 10.01  | 53.541  | -2.309 | 3.92E-34  |
| CCDC36   | ENSG00000 | 0.56   | 42.109  | -4.788 | 8.02E-93  |
| CCDC37   | ENSG00000 | 0.14   | 67.798  | -5.915 | 7.52E-66  |
| CCDC37-A | ENSG00000 | 0      | 101.623 | -6.681 | 2.73E-71  |
| CCDC38   | ENSG00000 | 0.24   | 30.17   | -4.652 | 9.07E-59  |
| CCDC39   | ENSG00000 | 0.43   | 11.45   | -3.122 | 1.55E-102 |
| CCDC40   | ENSG00000 | 1      | 28.879  | -3.901 | 3.82E-69  |
| CCDC42   | ENSG00000 | 0.24   | 124.68  | -6.663 | 6.48E-83  |
| CCDC53   | ENSG00000 | 25.351 | 161.422 | -2.624 | 3.05E-75  |
| CCDC54   | ENSG00000 | 0.03   | 132.973 | -7.023 | 4.74E-91  |
| CCDC60   | ENSG00000 | 0.24   | 15.74   | -3.755 | 5.30E-62  |
| CCDC62   | ENSG00000 | 0.37   | 41.659  | -4.961 | 1.46E-70  |
| CCDC63   | ENSG00000 | 0.64   | 22.811  | -3.86  | 4.85E-54  |
| CCDC64   | ENSG00000 | 9.87   | 76.781  | -2.839 | 5.22E-51  |
| CCDC65   | ENSG00000 | 2.42   | 39.469  | -3.565 | 2.36E-54  |
| CCDC67   | ENSG00000 | 0.17   | 32.271  | -4.83  | 8.26E-79  |
| CCDC68   | ENSG00000 | 0.26   | 10.58   | -3.2   | 3.75E-57  |
| CCDC7    | ENSG00000 | 0.48   | 68.45   | -5.552 | 1.09E-83  |
| CCDC70   | ENSG00000 | 0      | 169.318 | -7.412 | 3.41E-72  |
| CCDC73   | ENSG00000 | 0.08   | 4.16    | -2.256 | 5.49E-83  |
| CCDC74A  | ENSG00000 | 9      | 108.872 | -3.458 | 2.36E-96  |
| CCDC74B  | ENSG00000 | 3.85   | 83.239  | -4.118 | 8.56E-82  |
| CCDC79   | ENSG00000 | 0.16   | 14.77   | -3.765 | 1.28E-83  |
| CCDC82   | ENSG00000 | 8.44   | 49.7    | -2.425 | 4.62E-64  |
| CCDC83   | ENSG00000 | 0      | 27.059  | -4.81  | 8.64E-72  |
| CCDC87   | ENSG00000 | 0.19   | 18.01   | -3.998 | 9.48E-76  |
| CCDC88A  | ENSG00000 | 11.55  | 49.969  | -2.022 | 2.31E-40  |
| CCDC89   | ENSG00000 | 0.13   | 52.621  | -5.568 | 2.10E-80  |
| CCDC91   | ENSG00000 | 16.75  | 192.084 | -3.443 | 1.14E-49  |
| CCDC92   | ENSG00000 | 12.7   | 96.488  | -2.831 | 2.42E-51  |
| CCDC96   | ENSG00000 | 0.91   | 85.041  | -5.493 | 3.07E-74  |
| CCER1    | ENSG00000 | 0.01   | 60.249  | -5.922 | 5.40E-84  |
| CCHCR1   | ENSG00000 | 32.39  | 186.275 | -2.488 | 9.42E-50  |
| CCIN     | ENSG00000 | 0.18   | 92.577  | -6.309 | 1.90E-65  |
| CCNA1    | ENSG00000 | 1.2    | 84.459  | -5.28  | 1.70E-47  |
| CCNB3    | ENSG00000 | 0.33   | 8.84    | -2.887 | 2.37E-74  |
| CCNH     | ENSG00000 | 19.83  | 87.65   | -2.089 | 1.71E-70  |
| CCNJL    | ENSG00000 | 1.9    | 16.999  | -2.634 | 2.44E-63  |
| CCNO     | ENSG00000 | 1.97   | 21.01   | -2.89  | 1.17E-42  |
| CCNY     | ENSG00000 | 27.2   | 285.767 | -3.346 | 2.79E-53  |
| CCNYL2   | ENSG00000 | 0.05   | 6.21    | -2.78  | 4.47E-58  |
| CCSER1   | ENSG00000 | 0.21   | 19.55   | -4.086 | 2.48E-94  |
| CCSER2   | ENSG00000 | 7.72   | 151.828 | -4.131 | 7.50E-65  |
| CCT6B    | ENSG00000 | 1.49   | 107.589 | -5.447 | 3.73E-82  |
| CCT8L2   | ENSG00000 | 0.01   | 25.5    | -4.714 | 1.28E-62  |

|           |           |        |         |        |           |
|-----------|-----------|--------|---------|--------|-----------|
| CD200R1L  | ENSG00000 | 0      | 3.37    | -2.128 | 3.29E-43  |
| CD300LG   | ENSG00000 | 0.4    | 27.331  | -4.339 | 1.53E-112 |
| CDADC1    | ENSG00000 | 4.13   | 32.45   | -2.705 | 4.46E-86  |
| CDC14A    | ENSG00000 | 1.76   | 31.82   | -3.572 | 1.08E-55  |
| CDC14C    | ENSG00000 | 0.02   | 3.19    | -2.038 | 1.44E-53  |
| CDC20B    | ENSG00000 | 0.05   | 3.29    | -2.031 | 1.75E-44  |
| CDH12P2   | ENSG00000 | 0      | 3.71    | -2.236 | 1.09E-04  |
| CDH18     | ENSG00000 | 0.42   | 11.94   | -3.188 | 3.58E-58  |
| CDH23     | ENSG00000 | 1.73   | 15.92   | -2.632 | 3.46E-73  |
| CDHR2     | ENSG00000 | 0.14   | 36.481  | -5.039 | 6.53E-52  |
| CDHR4     | ENSG00000 | 0.06   | 10.97   | -3.497 | 3.62E-61  |
| CDIPT-AS1 | ENSG00000 | 0.74   | 150.936 | -6.448 | 2.46E-77  |
| CDK19     | ENSG00000 | 3.44   | 22.45   | -2.401 | 1.66E-64  |
| CDK20     | ENSG00000 | 2.93   | 27.429  | -2.855 | 1.83E-82  |
| CDKL2     | ENSG00000 | 0.21   | 11.47   | -3.365 | 1.75E-69  |
| CDKL3     | ENSG00000 | 0.95   | 23.801  | -3.669 | 7.07E-86  |
| CDKN2A    | ENSG00000 | 2.92   | 26.07   | -2.788 | 4.35E-37  |
| CDKN2B    | ENSG00000 | 1.3    | 9.73    | -2.222 | 4.48E-44  |
| CDKN2D    | ENSG00000 | 8.97   | 50.811  | -2.378 | 1.23E-56  |
| CDKN3     | ENSG00000 | 26.08  | 251.793 | -3.223 | 3.32E-31  |
| CDNF      | ENSG00000 | 1.47   | 30.49   | -3.672 | 2.61E-79  |
| CDRT1     | ENSG00000 | 0.37   | 17.33   | -3.742 | 2.80E-78  |
| CDRT15    | ENSG00000 | 0.17   | 21.201  | -4.246 | 7.03E-63  |
| CDRT15L2  | ENSG00000 | 0      | 20.599  | -4.433 | 6.03E-75  |
| CDRT15P1  | ENSG00000 | 0.17   | 11.56   | -3.424 | 1.71E-62  |
| CDRT4     | ENSG00000 | 2.2    | 41.949  | -3.746 | 6.02E-63  |
| CDRT8     | ENSG00000 | 0      | 3.59    | -2.199 | 1.32E-45  |
| CDYL2     | ENSG00000 | 1.55   | 9.93    | -2.1   | 1.66E-54  |
| CEACAM19  | ENSG00000 | 2.26   | 18.84   | -2.605 | 2.75E-59  |
| CELA3A    | ENSG00000 | 0.03   | 3.23    | -2.038 | 3.52E-24  |
| CELF2-AS1 | ENSG00000 | 0.05   | 3.56    | -2.119 | 1.36E-77  |
| CELF3     | ENSG00000 | 0.29   | 5.66    | -2.368 | 5.63E-27  |
| CELF6     | ENSG00000 | 0.88   | 16.82   | -3.245 | 4.16E-100 |
| CENPU     | ENSG00000 | 24.34  | 106.809 | -2.089 | 7.86E-26  |
| CEP112    | ENSG00000 | 4.24   | 112.993 | -4.443 | 2.54E-70  |
| CEP126    | ENSG00000 | 0.76   | 23.789  | -3.816 | 2.09E-100 |
| CEP162    | ENSG00000 | 4.34   | 29.191  | -2.499 | 1.03E-62  |
| CEP164    | ENSG00000 | 8.69   | 67.878  | -2.83  | 5.25E-91  |
| CEP164P1  | ENSG00000 | 0.04   | 8.99    | -3.264 | 4.97E-64  |
| CEP170    | ENSG00000 | 22.511 | 111.77  | -2.262 | 4.07E-31  |
| CEP170P1  | ENSG00000 | 0.91   | 81.069  | -5.425 | 1.66E-41  |
| CEP295NL  | ENSG00000 | 0.13   | 57.34   | -5.69  | 1.32E-66  |
| CEP350    | ENSG00000 | 7.46   | 85.68   | -3.357 | 3.46E-65  |
| CEP41     | ENSG00000 | 7.14   | 91.201  | -3.502 | 2.57E-50  |
| CEP57L1   | ENSG00000 | 5.66   | 26.02   | -2.02  | 1.17E-61  |
| CEP70     | ENSG00000 | 7.82   | 51.62   | -2.577 | 5.20E-50  |
| CEP83-AS1 | ENSG00000 | 0.36   | 14.33   | -3.495 | 7.76E-76  |
| CEP85L    | ENSG00000 | 3.8    | 46.16   | -3.296 | 2.51E-51  |
| CERS1     | ENSG00000 | 8.48   | 37.519  | -2.023 | 1.65E-45  |

|          |           |        |         |        |          |
|----------|-----------|--------|---------|--------|----------|
| CERS3    | ENSG00000 | 0.2    | 16.68   | -3.881 | 1.13E-66 |
| CES4A    | ENSG00000 | 1.9    | 16.151  | -2.564 | 1.10E-80 |
| CETN1    | ENSG00000 | 0.1    | 166.34  | -7.249 | 1.03E-80 |
| CETN3    | ENSG00000 | 26.009 | 167.753 | -2.643 | 5.19E-51 |
| CFAP126  | ENSG00000 | 0.08   | 31.449  | -4.909 | 7.64E-45 |
| CFAP221  | ENSG00000 | 0.87   | 47.389  | -4.694 | 3.89E-69 |
| CFAP43   | ENSG00000 | 1.02   | 56.519  | -4.832 | 4.75E-66 |
| CFAP44   | ENSG00000 | 1.82   | 19.5    | -2.862 | 9.13E-71 |
| CFAP44-A | ENSG00000 | 0      | 6.51    | -2.909 | 3.46E-48 |
| CFAP45   | ENSG00000 | 0.45   | 47.408  | -5.061 | 4.62E-65 |
| CFAP46   | ENSG00000 | 1.02   | 25.989  | -3.74  | 1.77E-68 |
| CFAP52   | ENSG00000 | 0.19   | 17.64   | -3.969 | 1.83E-66 |
| CFAP53   | ENSG00000 | 0.58   | 97.113  | -5.956 | 3.04E-83 |
| CFAP57   | ENSG00000 | 0.31   | 19.191  | -3.946 | 3.77E-72 |
| CFAP58   | ENSG00000 | 0.44   | 17.321  | -3.669 | 6.96E-64 |
| CFAP61   | ENSG00000 | 0.35   | 21.93   | -4.086 | 5.48E-63 |
| CFAP69   | ENSG00000 | 1.36   | 11.28   | -2.379 | 4.77E-64 |
| CFAP70   | ENSG00000 | 1.19   | 44.099  | -4.364 | 1.49E-96 |
| CFAP74   | ENSG00000 | 0.13   | 18.77   | -4.129 | 5.02E-88 |
| CFAP99   | ENSG00000 | 0.06   | 19.231  | -4.254 | 3.18E-80 |
| CFD      | ENSG00000 | 10.81  | 57.221  | -2.302 | 4.73E-21 |
| CH17-140 | ENSG00000 | 0.16   | 63.319  | -5.793 | 1.52E-66 |
| CH17-264 | ENSG00000 | 0      | 3.2     | -2.07  | 2.11E-17 |
| CH17-53B | ENSG00000 | 0      | 5.53    | -2.707 | 7.87E-71 |
| CH507-21 | ENSG00000 | 0.02   | 3.18    | -2.035 | 9.85E-35 |
| CH507-39 | ENSG00000 | 0.24   | 6.97    | -2.684 | 1.39E-27 |
| CH507-42 | ENSG00000 | 0.06   | 3.93    | -2.218 | 1.24E-66 |
| CHCHD2P  | ENSG00000 | 1.24   | 8.18    | -2.035 | 1.35E-51 |
| CHCHD6   | ENSG00000 | 18.13  | 77.6    | -2.039 | 3.84E-45 |
| CHD5     | ENSG00000 | 0.38   | 73.981  | -5.764 | 4.28E-87 |
| CHDH     | ENSG00000 | 0.96   | 7.64    | -2.14  | 2.61E-52 |
| CHGA     | ENSG00000 | 4.06   | 98.632  | -4.299 | 5.04E-52 |
| CHGB     | ENSG00000 | 2.79   | 16.53   | -2.21  | 2.06E-26 |
| CHKA     | ENSG00000 | 10.17  | 123.536 | -3.479 | 7.82E-80 |
| CHMP4BP1 | ENSG00000 | 0.73   | 6.86    | -2.184 | 8.60E-55 |
| CHODL    | ENSG00000 | 3.44   | 28.719  | -2.743 | 1.04E-43 |
| CHP2     | ENSG00000 | 0.14   | 5.68    | -2.551 | 5.60E-42 |
| CHRM3-A  | ENSG00000 | 0.38   | 26.829  | -4.334 | 2.28E-85 |
| CHRM4    | ENSG00000 | 0.05   | 6.31    | -2.8   | 3.15E-65 |
| CHST1    | ENSG00000 | 2.48   | 16.48   | -2.329 | 2.39E-33 |
| CHST13   | ENSG00000 | 0.97   | 24.07   | -3.67  | 4.61E-44 |
| CHST3    | ENSG00000 | 1.7    | 22.29   | -3.109 | 2.65E-59 |
| CIB4     | ENSG00000 | 0.05   | 22.441  | -4.481 | 9.84E-61 |
| CITED1   | ENSG00000 | 1.99   | 243.216 | -6.352 | 2.26E-71 |
| CITED4   | ENSG00000 | 3.67   | 31.43   | -2.796 | 2.92E-54 |
| CKLF-CMT | ENSG00000 | 0.65   | 11.79   | -2.954 | 6.85E-64 |
| CKM      | ENSG00000 | 0.27   | 12.73   | -3.434 | 3.28E-64 |
| CKMT2    | ENSG00000 | 1.22   | 8.21    | -2.053 | 1.60E-53 |
| CLCN2    | ENSG00000 | 3.56   | 32.52   | -2.878 | 1.08E-74 |

|           |           |         |          |        |           |
|-----------|-----------|---------|----------|--------|-----------|
| CLCNKA    | ENSG00000 | 0.35    | 9.17     | -2.913 | 9.35E-68  |
| CLDN11    | ENSG00000 | 3.31    | 195.482  | -5.511 | 2.98E-58  |
| CLDND2    | ENSG00000 | 1.14    | 57.412   | -4.771 | 1.72E-79  |
| CLEC12B   | ENSG00000 | 0.31    | 20.97    | -4.068 | 8.06E-103 |
| CLEC16A   | ENSG00000 | 8.42    | 79.621   | -3.097 | 1.51E-90  |
| CLEC18A   | ENSG00000 | 0.51    | 8.92     | -2.716 | 2.67E-49  |
| CLEC18B   | ENSG00000 | 0.6     | 25.01    | -4.023 | 1.39E-52  |
| CLEC18C   | ENSG00000 | 0.27    | 8.75     | -2.941 | 1.09E-45  |
| CLEC3B    | ENSG00000 | 3.06    | 147.983  | -5.198 | 1.72E-62  |
| CLEC4M    | ENSG00000 | 0.05    | 4.71     | -2.443 | 1.80E-44  |
| CLGN      | ENSG00000 | 0.35    | 63.928   | -5.588 | 4.54E-73  |
| CLIC5     | ENSG00000 | 0.46    | 8.36     | -2.681 | 3.67E-44  |
| CLIP1-AS1 | ENSG00000 | 0       | 4.77     | -2.529 | 1.24E-53  |
| CLIP4     | ENSG00000 | 2.5     | 29.51    | -3.124 | 4.77E-68  |
| CLK2P1    | ENSG00000 | 0.04    | 37.579   | -5.213 | 5.92E-76  |
| CLK4      | ENSG00000 | 5.75    | 36.511   | -2.474 | 2.27E-93  |
| CLMN      | ENSG00000 | 4.98    | 99.753   | -4.075 | 9.33E-61  |
| CLPB      | ENSG00000 | 9.94    | 431.225  | -5.304 | 2.94E-59  |
| CLPS      | ENSG00000 | 0       | 3.65     | -2.217 | 1.65E-17  |
| CLTCL1    | ENSG00000 | 3.82    | 67.409   | -3.827 | 1.45E-86  |
| CLU       | ENSG00000 | 159.575 | 3440.016 | -4.422 | 2.70E-47  |
| CLYBL-AS1 | ENSG00000 | 0       | 7.61     | -3.106 | 2.24E-57  |
| CMTM1     | ENSG00000 | 0.5     | 69.261   | -5.55  | 3.41E-73  |
| CMTM2     | ENSG00000 | 0.18    | 862.212  | -9.515 | 4.92E-88  |
| CNBD1     | ENSG00000 | 0       | 10.72    | -3.551 | 2.16E-61  |
| CNBD2     | ENSG00000 | 2.01    | 34.41    | -3.556 | 5.14E-70  |
| CNGA4     | ENSG00000 | 0.12    | 7.93     | -2.995 | 4.89E-63  |
| CNKSR3    | ENSG00000 | 2.31    | 13.36    | -2.117 | 1.74E-25  |
| CNN1      | ENSG00000 | 8.67    | 119.46   | -3.639 | 2.09E-45  |
| CNNM1     | ENSG00000 | 0.65    | 13.12    | -3.097 | 2.55E-87  |
| CNTD1     | ENSG00000 | 0.77    | 55.391   | -4.994 | 1.53E-95  |
| CNTFR-AS1 | ENSG00000 | 0       | 14.54    | -3.958 | 1.27E-63  |
| CNTN1     | ENSG00000 | 0.73    | 7.44     | -2.286 | 2.70E-31  |
| CNTN2     | ENSG00000 | 0.12    | 10.99    | -3.42  | 2.62E-42  |
| CNTN4     | ENSG00000 | 1.29    | 14.41    | -2.75  | 8.35E-36  |
| CNTRL     | ENSG00000 | 6.99    | 45.079   | -2.528 | 3.12E-60  |
| COIL      | ENSG00000 | 11.73   | 69.569   | -2.471 | 9.76E-46  |
| COL11A1   | ENSG00000 | 1.24    | 10.67    | -2.381 | 4.18E-13  |
| COL11A2   | ENSG00000 | 0.64    | 13.61    | -3.155 | 4.83E-55  |
| COL16A1   | ENSG00000 | 6.96    | 125.287  | -3.988 | 1.22E-39  |
| COL20A1   | ENSG00000 | 1.49    | 26.58    | -3.469 | 1.97E-59  |
| COL25A1   | ENSG00000 | 0.21    | 27.441   | -4.555 | 5.64E-66  |
| COL28A1   | ENSG00000 | 0.71    | 6.46     | -2.125 | 4.59E-42  |
| COL7A1    | ENSG00000 | 9.61    | 54.281   | -2.381 | 4.35E-23  |
| COL9A1    | ENSG00000 | 0.41    | 8.97     | -2.822 | 4.96E-17  |
| COLCA1    | ENSG00000 | 0.33    | 10.34    | -3.092 | 1.70E-70  |
| COLCA2    | ENSG00000 | 0.52    | 14.03    | -3.306 | 4.69E-77  |
| COLQ      | ENSG00000 | 1.01    | 7.69     | -2.112 | 5.11E-57  |
| COMP      | ENSG00000 | 3.17    | 20.17    | -2.344 | 1.05E-16  |



|             |           |        |          |        |           |
|-------------|-----------|--------|----------|--------|-----------|
| COPRS       | ENSG00000 | 45.361 | 310.402  | -2.748 | 7.30E-60  |
| COPZ2       | ENSG00000 | 4.97   | 33.339   | -2.524 | 3.67E-21  |
| COX6B2      | ENSG00000 | 0.96   | 188.719  | -6.597 | 9.50E-79  |
| COX7B2      | ENSG00000 | 0.73   | 106.668  | -5.96  | 1.16E-66  |
| COX7CP1     | ENSG00000 | 0      | 4.33     | -2.414 | 9.09E-30  |
| COX8C       | ENSG00000 | 4.36   | 97.059   | -4.193 | 1.34E-41  |
| CPA1        | ENSG00000 | 0.09   | 6.29     | -2.742 | 4.90E-41  |
| CPA5        | ENSG00000 | 0.25   | 48.778   | -5.316 | 1.59E-65  |
| CPB1        | ENSG00000 | 0.03   | 3.16     | -2.014 | 7.67E-34  |
| CPD         | ENSG00000 | 7.75   | 49.511   | -2.529 | 1.23E-44  |
| CPE         | ENSG00000 | 12.28  | 95.722   | -2.865 | 1.43E-24  |
| CPEB2       | ENSG00000 | 1.94   | 46.5     | -4.014 | 3.29E-91  |
| CPEB2-AS1   | ENSG00000 | 0.01   | 6.75     | -2.94  | 6.65E-73  |
| CPEB3       | ENSG00000 | 1.03   | 16.71    | -3.125 | 1.50E-66  |
| CPEB4       | ENSG00000 | 1.79   | 12.15    | -2.237 | 4.77E-68  |
| CPLX3       | ENSG00000 | 0.11   | 8.87     | -3.152 | 7.27E-82  |
| CPNE5       | ENSG00000 | 3.91   | 34.709   | -2.863 | 1.06E-48  |
| CPT1B       | ENSG00000 | 14.07  | 138.169  | -3.207 | 5.12E-65  |
| CPTP        | ENSG00000 | 11.99  | 91.868   | -2.838 | 1.19E-63  |
| CPXCR1      | ENSG00000 | 0      | 5.09     | -2.606 | 1.74E-55  |
| CRADD       | ENSG00000 | 5.93   | 29.821   | -2.153 | 2.18E-65  |
| CRAT        | ENSG00000 | 8.67   | 226.096  | -4.554 | 2.08E-85  |
| CRB1        | ENSG00000 | 0.03   | 3.92     | -2.256 | 5.53E-75  |
| CREB1       | ENSG00000 | 11.62  | 65.109   | -2.389 | 3.79E-40  |
| CREM        | ENSG00000 | 23.489 | 360.435  | -3.884 | 1.51E-70  |
| CRIP3       | ENSG00000 | 2.7    | 54.879   | -3.917 | 3.57E-67  |
| CRIPAK      | ENSG00000 | 1.92   | 19.53    | -2.814 | 2.15E-96  |
| CRISP2      | ENSG00000 | 0.12   | 612.259  | -9.097 | 1.57E-79  |
| CRNDE       | ENSG00000 | 9.87   | 282.282  | -4.704 | 2.14E-59  |
| CRY2        | ENSG00000 | 10.72  | 50.959   | -2.148 | 6.87E-63  |
| CRYAB       | ENSG00000 | 4.26   | 28.521   | -2.489 | 2.16E-20  |
| CRYBA2      | ENSG00000 | 0.25   | 6.04     | -2.494 | 2.01E-47  |
| CRYBG3      | ENSG00000 | 1.97   | 25.91    | -3.18  | 6.15E-71  |
| CSAD        | ENSG00000 | 9.88   | 64.592   | -2.592 | 1.35E-56  |
| CSAG3       | ENSG00000 | 0.27   | 5.1      | -2.264 | 1.60E-24  |
| CSDAP1      | ENSG00000 | 0.06   | 6.21     | -2.766 | 3.38E-66  |
| CSDC2       | ENSG00000 | 0.49   | 36.091   | -4.638 | 2.21E-89  |
| CSE1L-AS1   | ENSG00000 | 0.06   | 16.85    | -4.074 | 6.10E-70  |
| CSMD2-AS1   | ENSG00000 | 0      | 102.757  | -6.697 | 2.72E-73  |
| CSNK1A1L    | ENSG00000 | 0      | 3.46     | -2.157 | 1.77E-50  |
| CSNK1G1     | ENSG00000 | 3.91   | 20.91    | -2.158 | 3.33E-44  |
| CSNK1G2     | ENSG00000 | 37.59  | 242.913  | -2.66  | 2.34E-63  |
| CSNK1G2-AS1 | ENSG00000 | 0.02   | 14.28    | -3.905 | 2.36E-64  |
| CSNK2A2     | ENSG00000 | 42.22  | 181.785  | -2.08  | 3.23E-48  |
| CST13P      | ENSG00000 | 0      | 38.62    | -5.308 | 1.66E-67  |
| CST3        | ENSG00000 | 249.05 | 1000.149 | -2.001 | 1.94E-35  |
| CST8        | ENSG00000 | 0      | 27.389   | -4.827 | 6.99E-66  |
| CST9L       | ENSG00000 | 0      | 80.097   | -6.342 | 2.40E-102 |
| CSTL1       | ENSG00000 | 0.06   | 11.24    | -3.529 | 2.12E-56  |

|           |           |      |        |        |           |
|-----------|-----------|------|--------|--------|-----------|
| CT45A1    | ENSG00000 | 0.17 | 8.44   | -3.012 | 2.17E-23  |
| CT45A10   | ENSG00000 | 0.13 | 7.59   | -2.926 | 1.03E-26  |
| CT45A3    | ENSG00000 | 0.17 | 12.81  | -3.561 | 1.84E-25  |
| CT45A5    | ENSG00000 | 0.13 | 4.08   | -2.168 | 1.10E-16  |
| CT47B1    | ENSG00000 | 0    | 8.28   | -3.214 | 1.61E-75  |
| CT55      | ENSG00000 | 0.16 | 4.9    | -2.347 | 1.15E-57  |
| CT62      | ENSG00000 | 0.06 | 38.149 | -5.207 | 7.41E-69  |
| CT83      | ENSG00000 | 0.9  | 73.541 | -5.294 | 9.77E-58  |
| CTA-125H  | ENSG00000 | 0    | 18.1   | -4.256 | 2.34E-61  |
| CTA-299D  | ENSG00000 | 0.02 | 5.9    | -2.758 | 2.14E-56  |
| CTA-398F1 | ENSG00000 | 0    | 4.89   | -2.558 | 2.65E-46  |
| CTA-407F1 | ENSG00000 | 0    | 29.871 | -4.948 | 2.77E-74  |
| CTAG1A    | ENSG00000 | 0.21 | 15.47  | -3.767 | 1.21E-40  |
| CTAG2     | ENSG00000 | 1.45 | 12.98  | -2.513 | 3.02E-19  |
| CTAGE1    | ENSG00000 | 0    | 11.94  | -3.694 | 3.81E-76  |
| CTAGE10P  | ENSG00000 | 0.02 | 5.68   | -2.711 | 1.06E-64  |
| CTAGE11P  | ENSG00000 | 0.01 | 4.59   | -2.468 | 2.82E-55  |
| CTAGE13P  | ENSG00000 | 0    | 5.76   | -2.757 | 2.10E-65  |
| CTAGE15   | ENSG00000 | 0.29 | 9.25   | -2.99  | 7.41E-40  |
| CTAGE16P  | ENSG00000 | 0    | 4.14   | -2.362 | 5.42E-56  |
| CTAGE3P   | ENSG00000 | 0.34 | 8.66   | -2.85  | 5.40E-44  |
| CTAGE4    | ENSG00000 | 2.85 | 15.15  | -2.069 | 3.95E-21  |
| CTAGE6    | ENSG00000 | 0    | 14.55  | -3.959 | 4.38E-63  |
| CTAGE7P   | ENSG00000 | 0.17 | 6.59   | -2.698 | 1.01E-77  |
| CTAGE8    | ENSG00000 | 1.75 | 10.89  | -2.112 | 4.68E-25  |
| CTAGE9    | ENSG00000 | 0    | 9.64   | -3.411 | 2.31E-63  |
| CTB-134H  | ENSG00000 | 0.1  | 10.4   | -3.374 | 1.62E-66  |
| CTB-147C  | ENSG00000 | 0    | 6.79   | -2.962 | 2.45E-51  |
| CTB-164N  | ENSG00000 | 0    | 3.09   | -2.032 | 1.25E-55  |
| CTB-167B  | ENSG00000 | 0    | 4.36   | -2.422 | 1.19E-58  |
| CTB-174D  | ENSG00000 | 0    | 24.45  | -4.67  | 2.49E-67  |
| CTB-181F  | ENSG00000 | 0    | 10.56  | -3.531 | 2.97E-51  |
| CTB-31O   | ENSG00000 | 0.92 | 34.441 | -4.206 | 8.12E-106 |
| CTB-32O   | ENSG00000 | 0.12 | 7.41   | -2.909 | 4.74E-90  |
| CTB-33O   | ENSG00000 | 0.03 | 6.05   | -2.775 | 2.40E-64  |
| CTB-35F   | ENSG00000 | 0    | 30.02  | -4.955 | 9.83E-73  |
| CTB-50L   | ENSG00000 | 0.3  | 7.91   | -2.777 | 1.08E-67  |
| CTB-55O   | ENSG00000 | 0.12 | 10.47  | -3.356 | 2.41E-75  |
| CTB-79E   | ENSG00000 | 0    | 8.94   | -3.313 | 3.06E-59  |
| CTB-91J   | ENSG00000 | 0    | 6.49   | -2.905 | 1.20E-60  |
| CTC-1337  | ENSG00000 | 0.13 | 5.49   | -2.522 | 1.68E-77  |
| CTC-203F  | ENSG00000 | 0.08 | 12.55  | -3.649 | 7.19E-74  |
| CTC-232P  | ENSG00000 | 0    | 5.23   | -2.639 | 3.59E-49  |
| CTC-270D  | ENSG00000 | 0.63 | 11.84  | -2.978 | 1.16E-59  |
| CTC-273B  | ENSG00000 | 0.25 | 25.029 | -4.38  | 4.62E-67  |
| CTC-308K  | ENSG00000 | 0.32 | 6.02   | -2.411 | 6.75E-86  |
| CTC-338M  | ENSG00000 | 0    | 11.06  | -3.592 | 9.48E-62  |
| CTC-338M  | ENSG00000 | 0.94 | 33.92  | -4.17  | 1.46E-87  |
| CTC-338M  | ENSG00000 | 0    | 3.94   | -2.305 | 1.07E-73  |

|                      |      |         |        |          |
|----------------------|------|---------|--------|----------|
| CTC-347C: ENSG00000  | 0    | 3.87    | -2.284 | 7.10E-56 |
| CTC-347C: ENSG00000  | 0    | 5.25    | -2.644 | 1.96E-55 |
| CTC-360P9: ENSG00000 | 0    | 4.55    | -2.473 | 1.01E-56 |
| CTC-360P9: ENSG00000 | 0    | 6       | -2.807 | 1.33E-54 |
| CTC-360P9: ENSG00000 | 0    | 3.02    | -2.007 | 8.05E-55 |
| CTC-439O: ENSG00000  | 0    | 4.3     | -2.406 | 3.09E-47 |
| CTC-441N: ENSG00000  | 0    | 256.745 | -8.01  | 6.17E-76 |
| CTC-453G: ENSG00000  | 0    | 8.37    | -3.228 | 1.44E-57 |
| CTC-459F4: ENSG00000 | 0    | 3.09    | -2.032 | 1.85E-34 |
| CTC-459M: ENSG00000  | 0    | 12.08   | -3.709 | 4.57E-61 |
| CTC-471J1: ENSG00000 | 1.05 | 7.88    | -2.115 | 1.23E-68 |
| CTC-479C: ENSG00000  | 0    | 4.89    | -2.558 | 1.01E-62 |
| CTC-523E2: ENSG00000 | 0.14 | 17.38   | -4.011 | 2.51E-62 |
| CTC-523E2: ENSG00000 | 0    | 4.69    | -2.508 | 1.58E-61 |
| CTC-523E2: ENSG00000 | 0.08 | 4.45    | -2.335 | 1.57E-58 |
| CTC-523E2: ENSG00000 | 0.07 | 5.56    | -2.616 | 6.01E-68 |
| CTC-523E2: ENSG00000 | 0.05 | 11.92   | -3.621 | 2.81E-78 |
| CTC-527H: ENSG00000  | 0    | 13.07   | -3.815 | 2.39E-61 |
| CTC-543D: ENSG00000  | 0.7  | 8.32    | -2.455 | 1.35E-74 |
| CTC-559E9: ENSG00000 | 0    | 4.26    | -2.395 | 7.47E-57 |
| CTC-774J1: ENSG00000 | 0    | 3.34    | -2.118 | 9.81E-55 |
| CTCFL: ENSG00000     | 0.2  | 9.11    | -3.075 | 1.60E-77 |
| CTD-2006: ENSG00000  | 4.33 | 23.91   | -2.225 | 1.27E-68 |
| CTD-2008: ENSG00000  | 0.13 | 26.891  | -4.625 | 9.55E-85 |
| CTD-2010: ENSG00000  | 0    | 6.41    | -2.889 | 6.00E-58 |
| CTD-2012: ENSG00000  | 1.2  | 15.76   | -2.929 | 8.97E-05 |
| CTD-2014: ENSG00000  | 0.04 | 10.71   | -3.493 | 3.54E-72 |
| CTD-2014: ENSG00000  | 0    | 4.74    | -2.521 | 3.86E-52 |
| CTD-2014: ENSG00000  | 0.06 | 4.01    | -2.241 | 1.32E-59 |
| CTD-2015: ENSG00000  | 0    | 17.73   | -4.227 | 3.87E-63 |
| CTD-2015: ENSG00000  | 1.94 | 14.26   | -2.376 | 5.04E-53 |
| CTD-2021: ENSG00000  | 1.2  | 55.749  | -4.689 | 1.03E-56 |
| CTD-2021: ENSG00000  | 2.24 | 54.829  | -4.107 | 2.42E-49 |
| CTD-2022: ENSG00000  | 0    | 4.19    | -2.376 | 5.46E-73 |
| CTD-2022: ENSG00000  | 0.05 | 5.94    | -2.725 | 6.82E-78 |
| CTD-2024: ENSG00000  | 0    | 4.9     | -2.561 | 3.03E-37 |
| CTD-2033: ENSG00000  | 0.35 | 4.94    | -2.138 | 3.51E-81 |
| CTD-2033: ENSG00000  | 0    | 4.72    | -2.516 | 1.02E-56 |
| CTD-2036: ENSG00000  | 0.26 | 6.4     | -2.554 | 9.61E-58 |
| CTD-2050: ENSG00000  | 0    | 3.6     | -2.202 | 1.15E-57 |
| CTD-2054: ENSG00000  | 1.45 | 18.35   | -2.982 | 6.80E-78 |
| CTD-2071: ENSG00000  | 0    | 15.61   | -4.054 | 4.75E-53 |
| CTD-2071: ENSG00000  | 0    | 5.74    | -2.753 | 2.09E-53 |
| CTD-2083: ENSG00000  | 0.09 | 12.91   | -3.674 | 9.94E-78 |
| CTD-2086: ENSG00000  | 0.03 | 4.74    | -2.478 | 1.78E-62 |
| CTD-2105: ENSG00000  | 0.04 | 12.51   | -3.699 | 2.36E-74 |
| CTD-2116: ENSG00000  | 0.12 | 20.069  | -4.234 | 4.71E-60 |
| CTD-2118: ENSG00000  | 0.05 | 23.209  | -4.527 | 7.17E-64 |
| CTD-2135: ENSG00000  | 0.02 | 5.8     | -2.737 | 3.85E-62 |

|                   |      |         |        |          |
|-------------------|------|---------|--------|----------|
| CTD-2143 ENSG0000 | 0    | 9.16    | -3.345 | 1.81E-58 |
| CTD-2144 ENSG0000 | 0.62 | 10.23   | -2.793 | 1.33E-35 |
| CTD-2151 ENSG0000 | 0    | 4.7     | -2.511 | 1.84E-52 |
| CTD-2170 ENSG0000 | 0    | 9.67    | -3.416 | 1.52E-57 |
| CTD-2184 ENSG0000 | 0.18 | 58.088  | -5.646 | 1.43E-74 |
| CTD-2194 ENSG0000 | 0    | 5.05    | -2.597 | 1.86E-66 |
| CTD-2194 ENSG0000 | 0.02 | 3.22    | -2.049 | 4.85E-63 |
| CTD-2200 ENSG0000 | 0.28 | 11.48   | -3.285 | 9.45E-69 |
| CTD-2201 ENSG0000 | 0.87 | 8.78    | -2.387 | 5.13E-66 |
| CTD-2201 ENSG0000 | 0.03 | 5.61    | -2.682 | 1.37E-57 |
| CTD-2201 ENSG0000 | 0.07 | 3.72    | -2.141 | 3.30E-65 |
| CTD-2210 ENSG0000 | 0    | 103.982 | -6.714 | 1.69E-86 |
| CTD-2210 ENSG0000 | 0    | 4.46    | -2.449 | 5.53E-51 |
| CTD-2228 ENSG0000 | 7.41 | 160.362 | -4.262 | 4.47E-77 |
| CTD-2231 ENSG0000 | 0    | 9.3     | -3.365 | 7.78E-53 |
| CTD-2260 ENSG0000 | 0.41 | 4.86    | -2.055 | 1.38E-84 |
| CTD-2267 ENSG0000 | 0.1  | 8.72    | -3.143 | 6.00E-73 |
| CTD-2270 ENSG0000 | 1.24 | 14.69   | -2.808 | 1.40E-80 |
| CTD-2270 ENSG0000 | 0.35 | 4.62    | -2.058 | 1.58E-72 |
| CTD-2277 ENSG0000 | 0    | 5.28    | -2.651 | 5.05E-62 |
| CTD-2281 ENSG0000 | 0    | 3.08    | -2.029 | 1.08E-44 |
| CTD-2291 ENSG0000 | 0    | 5.26    | -2.646 | 9.18E-54 |
| CTD-2296 ENSG0000 | 0    | 8.33    | -3.222 | 7.84E-57 |
| CTD-2296 ENSG0000 | 0    | 19.44   | -4.353 | 3.92E-55 |
| CTD-2303 ENSG0000 | 4.11 | 23.02   | -2.233 | 9.63E-28 |
| CTD-2313 ENSG0000 | 0    | 6.98    | -2.996 | 1.58E-47 |
| CTD-2314 ENSG0000 | 0    | 8.56    | -3.257 | 2.00E-74 |
| CTD-2329 ENSG0000 | 0    | 3.18    | -2.064 | 1.67E-58 |
| CTD-2330 ENSG0000 | 0    | 9.2     | -3.351 | 8.81E-61 |
| CTD-2330 ENSG0000 | 0.06 | 9.64    | -3.327 | 1.37E-59 |
| CTD-2350 ENSG0000 | 0    | 5.16    | -2.623 | 6.86E-65 |
| CTD-2376 ENSG0000 | 0.66 | 8.8     | -2.562 | 1.83E-57 |
| CTD-2501 ENSG0000 | 0    | 3.9     | -2.293 | 1.57E-51 |
| CTD-2506 ENSG0000 | 0.85 | 10.33   | -2.615 | 2.59E-55 |
| CTD-2514 ENSG0000 | 0.47 | 6.1     | -2.272 | 1.42E-30 |
| CTD-2517 ENSG0000 | 1.12 | 9.59    | -2.321 | 3.99E-77 |
| CTD-2520 ENSG0000 | 0    | 19.39   | -4.35  | 6.73E-63 |
| CTD-2528 ENSG0000 | 0    | 5.21    | -2.635 | 4.45E-56 |
| CTD-2530 ENSG0000 | 1.16 | 14.49   | -2.842 | 7.39E-48 |
| CTD-2537 ENSG0000 | 4.43 | 30.519  | -2.537 | 1.40E-66 |
| CTD-2538 ENSG0000 | 1.47 | 68.94   | -4.824 | 4.34E-73 |
| CTD-2538 ENSG0000 | 0    | 6.3     | -2.868 | 6.70E-67 |
| CTD-2542 ENSG0000 | 0    | 7.57    | -3.099 | 2.01E-60 |
| CTD-2544 ENSG0000 | 0    | 6.56    | -2.918 | 3.23E-61 |
| CTD-2553 ENSG0000 | 2.33 | 15.41   | -2.301 | 2.29E-67 |
| CTD-2560 ENSG0000 | 0    | 9.5     | -3.392 | 1.09E-67 |
| CTD-2568 ENSG0000 | 0.07 | 267.148 | -7.969 | 1.43E-76 |
| CTD-2568 ENSG0000 | 0    | 13.44   | -3.852 | 1.96E-66 |
| CTD-2576 ENSG0000 | 0.23 | 6.18    | -2.545 | 2.20E-76 |

|          |          |        |         |        |          |
|----------|----------|--------|---------|--------|----------|
| CTD-2583 | ENSG0000 | 0.03   | 3.22    | -2.035 | 9.60E-52 |
| CTD-2586 | ENSG0000 | 0      | 7.9     | -3.154 | 1.79E-57 |
| CTD-2588 | ENSG0000 | 0.06   | 6.13    | -2.75  | 6.80E-64 |
| CTD-2623 | ENSG0000 | 0.03   | 3.17    | -2.017 | 1.72E-63 |
| CTD-2623 | ENSG0000 | 0      | 5.04    | -2.595 | 6.86E-66 |
| CTD-2631 | ENSG0000 | 0      | 4.98    | -2.58  | 3.41E-66 |
| CTD-2647 | ENSG0000 | 0      | 10.27   | -3.494 | 9.16E-51 |
| CTD-2649 | ENSG0000 | 0.13   | 11.53   | -3.471 | 2.85E-77 |
| CTD-2650 | ENSG0000 | 0.35   | 6.32    | -2.439 | 3.38E-61 |
| CTD-2655 | ENSG0000 | 0.06   | 17.39   | -4.117 | 3.36E-80 |
| CTD-2666 | ENSG0000 | 2.2    | 15.57   | -2.372 | 2.34E-50 |
| CTD-3028 | ENSG0000 | 0      | 9.98    | -3.457 | 1.62E-62 |
| CTD-3035 | ENSG0000 | 0.62   | 13.66   | -3.178 | 4.43E-75 |
| CTD-3074 | ENSG0000 | 0      | 3.92    | -2.299 | 1.89E-56 |
| CTD-3074 | ENSG0000 | 1.78   | 22.73   | -3.094 | 8.17E-71 |
| CTD-3080 | ENSG0000 | 0.09   | 4.95    | -2.449 | 6.37E-40 |
| CTD-3088 | ENSG0000 | 0.7    | 6.42    | -2.126 | 4.70E-56 |
| CTD-3154 | ENSG0000 | 0.5    | 5.66    | -2.151 | 1.53E-59 |
| CTD-3162 | ENSG0000 | 12.69  | 78.27   | -2.534 | 1.89E-23 |
| CTD-3179 | ENSG0000 | 0.05   | 4.48    | -2.384 | 7.81E-60 |
| CTD-3185 | ENSG0000 | 1.44   | 14.99   | -2.712 | 9.80E-69 |
| CTD-3187 | ENSG0000 | 0      | 22.119  | -4.531 | 3.12E-72 |
| CTD-3194 | ENSG0000 | 0      | 3.56    | -2.189 | 7.39E-51 |
| CTD-3220 | ENSG0000 | 8.57   | 116.969 | -3.624 | 2.07E-40 |
| CTGLF11P | ENSG0000 | 0.27   | 7.67    | -2.771 | 1.67E-55 |
| CTGLF12P | ENSG0000 | 1.04   | 18.04   | -3.222 | 4.40E-65 |
| CTNNA2   | ENSG0000 | 0.47   | 24.609  | -4.123 | 3.16E-79 |
| CTNNA3   | ENSG0000 | 0.47   | 11.1    | -3.041 | 5.79E-62 |
| CTRB1    | ENSG0000 | 0      | 3.38    | -2.131 | 6.92E-24 |
| CTRB2    | ENSG0000 | 0.04   | 3.69    | -2.173 | 4.00E-20 |
| CTSF     | ENSG0000 | 8      | 184.17  | -4.363 | 1.26E-89 |
| CTSG     | ENSG0000 | 0.06   | 4.06    | -2.255 | 4.54E-29 |
| CUL3     | ENSG0000 | 49.05  | 271.497 | -2.445 | 5.60E-56 |
| CUL9     | ENSG0000 | 20.5   | 92.5    | -2.121 | 3.71E-59 |
| CXADRP2  | ENSG0000 | 0      | 28.41   | -4.878 | 1.04E-76 |
| CXADRP3  | ENSG0000 | 0.06   | 13.32   | -3.756 | 2.30E-71 |
| CXCL16   | ENSG0000 | 23.091 | 203.543 | -3.086 | 8.72E-33 |
| CXorf49  | ENSG0000 | 0.17   | 7.41    | -2.846 | 3.63E-29 |
| CXorf49B | ENSG0000 | 0.17   | 4.66    | -2.274 | 5.42E-13 |
| CXorf51B | ENSG0000 | 0      | 164.688 | -7.372 | 8.74E-81 |
| CXorf58  | ENSG0000 | 0.08   | 3.37    | -2.017 | 2.16E-68 |
| CXorf65  | ENSG0000 | 0.97   | 49.121  | -4.669 | 5.22E-49 |
| CXorf66  | ENSG0000 | 0      | 16.979  | -4.168 | 2.39E-70 |
| CYB5D2   | ENSG0000 | 7.63   | 40.961  | -2.282 | 3.34E-56 |
| CYB5R2   | ENSG0000 | 15.83  | 188.105 | -3.49  | 9.09E-61 |
| CYB5R4   | ENSG0000 | 6.04   | 33.109  | -2.276 | 5.39E-37 |
| CYLC1    | ENSG0000 | 0      | 36.46   | -5.227 | 2.02E-70 |
| CYLC2    | ENSG0000 | 0      | 89.498  | -6.5   | 1.91E-68 |
| CYP11A1  | ENSG0000 | 2.09   | 33.27   | -3.471 | 3.14E-47 |

|           |           |       |         |        |          |
|-----------|-----------|-------|---------|--------|----------|
| CYP11B1   | ENSG00000 | 0     | 5.28    | -2.651 | 4.88E-68 |
| CYP17A1   | ENSG00000 | 0.15  | 15.25   | -3.821 | 5.65E-31 |
| CYP17A1-1 | ENSG00000 | 0.18  | 20.669  | -4.199 | 2.27E-79 |
| CYP19A1   | ENSG00000 | 0.16  | 21.17   | -4.256 | 9.19E-71 |
| CYP26B1   | ENSG00000 | 1.04  | 16.58   | -3.107 | 2.79E-53 |
| CYP2C8    | ENSG00000 | 1.1   | 9.23    | -2.284 | 1.32E-36 |
| CYP4F26P  | ENSG00000 | 0.85  | 12.7    | -2.889 | 4.06E-33 |
| CYP4F29P  | ENSG00000 | 1.43  | 19.8    | -3.098 | 2.71E-32 |
| CYP4F30P  | ENSG00000 | 0.13  | 29.821  | -4.77  | 4.87E-75 |
| CYP4F32P  | ENSG00000 | 0     | 18.29   | -4.27  | 6.71E-70 |
| CYP4F34P  | ENSG00000 | 0     | 11.86   | -3.685 | 4.92E-80 |
| CYP4F35P  | ENSG00000 | 0.52  | 20.26   | -3.806 | 1.61E-44 |
| CYP4F62P  | ENSG00000 | 0.05  | 20.4    | -4.349 | 4.60E-61 |
| CYP51A1-1 | ENSG00000 | 0.07  | 3.66    | -2.123 | 5.46E-73 |
| DAAM2     | ENSG00000 | 2.28  | 20.45   | -2.709 | 2.75E-43 |
| DAB1-AS1  | ENSG00000 | 0     | 49.59   | -5.661 | 5.48E-70 |
| DACH1     | ENSG00000 | 0.4   | 4.94    | -2.085 | 1.32E-30 |
| DACT3     | ENSG00000 | 1.55  | 22.841  | -3.225 | 1.39E-34 |
| DACT3-AS  | ENSG00000 | 0.19  | 9.4     | -3.128 | 2.76E-62 |
| DAW1      | ENSG00000 | 0.05  | 44.029  | -5.422 | 1.71E-73 |
| DAZ1      | ENSG00000 | 0.12  | 6.92    | -2.822 | 1.66E-49 |
| DAZL      | ENSG00000 | 0.62  | 41.711  | -4.721 | 5.01E-19 |
| DBIL5P    | ENSG00000 | 0.68  | 37.32   | -4.512 | 7.83E-73 |
| DCAF10    | ENSG00000 | 5.96  | 43.74   | -2.684 | 8.69E-63 |
| DCAF12L1  | ENSG00000 | 0.61  | 6.09    | -2.139 | 4.72E-55 |
| DCAF12L2  | ENSG00000 | 0.33  | 5.79    | -2.352 | 8.20E-55 |
| DCAF4L1   | ENSG00000 | 0.35  | 22.83   | -4.142 | 9.71E-22 |
| DCAF8L2   | ENSG00000 | 0.19  | 19.44   | -4.102 | 4.45E-80 |
| DCC       | ENSG00000 | 0.12  | 26.13   | -4.598 | 1.64E-61 |
| DCDC1     | ENSG00000 | 0.11  | 5.13    | -2.465 | 1.01E-66 |
| DCDC2C    | ENSG00000 | 0.02  | 6.28    | -2.835 | 8.17E-61 |
| DCST1     | ENSG00000 | 0.04  | 10.39   | -3.453 | 4.15E-66 |
| DCST2     | ENSG00000 | 1.21  | 24.69   | -3.539 | 2.51E-62 |
| DCUN1D1   | ENSG00000 | 10.53 | 303.488 | -4.723 | 3.05E-58 |
| DDAH1     | ENSG00000 | 2.28  | 14.98   | -2.285 | 1.38E-24 |
| DDI1      | ENSG00000 | 0     | 30.98   | -4.999 | 1.89E-67 |
| DDX11L1   | ENSG00000 | 0.27  | 4.14    | -2.017 | 1.41E-49 |
| DDX11L2   | ENSG00000 | 1.57  | 15.401  | -2.674 | 2.55E-56 |
| DDX20     | ENSG00000 | 10.32 | 67.991  | -2.608 | 1.83E-46 |
| DDX25     | ENSG00000 | 3.43  | 103.371 | -4.558 | 4.21E-63 |
| DDX4      | ENSG00000 | 2.02  | 131.607 | -5.456 | 9.96E-59 |
| DDX53     | ENSG00000 | 0.71  | 5.91    | -2.015 | 2.08E-40 |
| DEFB119   | ENSG00000 | 0.08  | 453.575 | -8.717 | 8.62E-83 |
| DEFB121   | ENSG00000 | 0     | 6.17    | -2.842 | 2.51E-54 |
| DEFB123   | ENSG00000 | 0.83  | 165.742 | -6.51  | 4.43E-82 |
| DEFB124   | ENSG00000 | 2.55  | 15.41   | -2.209 | 3.32E-23 |
| DENND6A   | ENSG00000 | 0     | 3.83    | -2.272 | 8.70E-64 |
| DENND6B   | ENSG00000 | 3.47  | 22.36   | -2.386 | 3.66E-52 |
| DEPDC7    | ENSG00000 | 4.89  | 24.981  | -2.141 | 1.55E-27 |

|            |           |       |         |        |           |
|------------|-----------|-------|---------|--------|-----------|
| DESI1      | ENSG00000 | 15.11 | 65.871  | -2.053 | 2.92E-53  |
| DFNB31     | ENSG00000 | 4.96  | 82.458  | -3.808 | 3.27E-112 |
| DFNB59     | ENSG00000 | 1.55  | 44.12   | -4.145 | 1.71E-103 |
| DGAT2      | ENSG00000 | 3.66  | 52.388  | -3.518 | 6.43E-40  |
| DGCR5      | ENSG00000 | 0.59  | 6.78    | -2.291 | 1.60E-41  |
| DGCR6      | ENSG00000 | 12.54 | 53.511  | -2.009 | 1.39E-30  |
| DGCR9      | ENSG00000 | 0.22  | 6.45    | -2.61  | 1.28E-49  |
| DHH        | ENSG00000 | 0.1   | 22.23   | -4.4   | 3.44E-100 |
| DHRS2      | ENSG00000 | 0.33  | 5.36    | -2.258 | 3.33E-25  |
| DHRS4L1    | ENSG00000 | 0.22  | 5.99    | -2.518 | 4.94E-67  |
| DHRS9      | ENSG00000 | 1.76  | 13.42   | -2.385 | 2.39E-23  |
| DIAPH3     | ENSG00000 | 3.25  | 20.11   | -2.312 | 3.31E-30  |
| DIAPH3-A1  | ENSG00000 | 0     | 8       | -3.17  | 1.23E-50  |
| DIAPH3-A2  | ENSG00000 | 0     | 12.43   | -3.747 | 5.21E-59  |
| DICER1-AS1 | ENSG00000 | 3.61  | 23.03   | -2.382 | 1.44E-65  |
| DIO3OS     | ENSG00000 | 0.65  | 27.05   | -4.087 | 4.02E-46  |
| DISP1      | ENSG00000 | 0.85  | 8.17    | -2.309 | 1.19E-41  |
| DKFZP434H  | ENSG00000 | 0     | 4.89    | -2.558 | 1.79E-59  |
| DKFZp434J  | ENSG00000 | 2.31  | 12.29   | -2.005 | 4.32E-36  |
| DKFZP434I  | ENSG00000 | 0     | 15.89   | -4.078 | 4.97E-63  |
| DKFZp779M  | ENSG00000 | 0.1   | 4.21    | -2.244 | 4.78E-57  |
| DKKL1      | ENSG00000 | 4.45  | 466.133 | -6.421 | 1.34E-60  |
| DLEC1      | ENSG00000 | 0.34  | 31.089  | -4.582 | 8.27E-101 |
| DLG1-AS1   | ENSG00000 | 0.05  | 6.79    | -2.891 | 1.11E-68  |
| DLG2       | ENSG00000 | 0.52  | 5.66    | -2.131 | 3.39E-34  |
| DLG4       | ENSG00000 | 8.03  | 46.131  | -2.384 | 1.49E-54  |
| DLGAP1     | ENSG00000 | 0.71  | 6.24    | -2.082 | 3.71E-48  |
| DLGAP2     | ENSG00000 | 0.06  | 14.64   | -3.883 | 7.82E-64  |
| DLGAP2-A   | ENSG00000 | 0     | 5.3     | -2.655 | 9.56E-52  |
| DLGAP4-A   | ENSG00000 | 0.88  | 8.95    | -2.404 | 1.67E-63  |
| DLX6       | ENSG00000 | 0.1   | 7.73    | -2.989 | 3.49E-86  |
| DMGDH      | ENSG00000 | 0.49  | 5.64    | -2.156 | 5.84E-101 |
| DMRT1      | ENSG00000 | 3.59  | 26.44   | -2.58  | 5.82E-23  |
| DMRT3      | ENSG00000 | 0.32  | 12.29   | -3.332 | 4.80E-73  |
| DMRTB1     | ENSG00000 | 0.85  | 86.737  | -5.568 | 1.74E-72  |
| DMRTC1B    | ENSG00000 | 0.21  | 11.42   | -3.36  | 9.69E-57  |
| DMRTC2     | ENSG00000 | 0.07  | 60.249  | -5.839 | 2.17E-100 |
| DNAAF1     | ENSG00000 | 0.85  | 132.119 | -6.169 | 4.71E-70  |
| DNAAF3     | ENSG00000 | 2.29  | 141.807 | -5.44  | 4.57E-64  |
| DNAH1      | ENSG00000 | 2.04  | 32.71   | -3.471 | 4.19E-94  |
| DNAH10     | ENSG00000 | 1.91  | 15.83   | -2.532 | 8.03E-25  |
| DNAH12     | ENSG00000 | 0.12  | 20.269  | -4.247 | 2.04E-81  |
| DNAH14     | ENSG00000 | 5.72  | 34.961  | -2.42  | 7.23E-45  |
| DNAH17     | ENSG00000 | 1.04  | 38.799  | -4.286 | 3.12E-77  |
| DNAH2      | ENSG00000 | 0.11  | 8.65    | -3.12  | 2.48E-64  |
| DNAH3      | ENSG00000 | 0.33  | 6.84    | -2.559 | 5.39E-66  |
| DNAH6      | ENSG00000 | 0.13  | 9.81    | -3.258 | 4.45E-62  |
| DNAH7      | ENSG00000 | 0.11  | 14.65   | -3.818 | 1.77E-78  |
| DNAH8      | ENSG00000 | 0.28  | 6.37    | -2.526 | 1.36E-58  |

|           |           |        |         |        |           |
|-----------|-----------|--------|---------|--------|-----------|
| DNAH9     | ENSG00000 | 0.65   | 14.36   | -3.219 | 8.08E-58  |
| DNAI1     | ENSG00000 | 0.77   | 54.24   | -4.964 | 5.01E-71  |
| DNAI2     | ENSG00000 | 0.05   | 49.99   | -5.602 | 1.28E-78  |
| DNAJA4    | ENSG00000 | 15.51  | 185.991 | -3.502 | 1.33E-64  |
| DNAJB13   | ENSG00000 | 0.26   | 25.849  | -4.413 | 1.40E-62  |
| DNAJB3    | ENSG00000 | 0.02   | 48.15   | -5.591 | 3.73E-80  |
| DNAJB7    | ENSG00000 | 0.13   | 12.88   | -3.619 | 7.22E-68  |
| DNAJB8    | ENSG00000 | 0      | 65.89   | -6.064 | 3.04E-71  |
| DNAJB8-A  | ENSG00000 | 0      | 4.52    | -2.465 | 1.46E-59  |
| DNAJC12   | ENSG00000 | 0.65   | 8.12    | -2.467 | 4.33E-45  |
| DNAJC18   | ENSG00000 | 6.9    | 220.341 | -4.808 | 7.28E-69  |
| DNAJC24   | ENSG00000 | 3.72   | 19.18   | -2.096 | 3.01E-53  |
| DNAJC27   | ENSG00000 | 2.29   | 15.29   | -2.308 | 1.54E-70  |
| DNAJC27-  | ENSG00000 | 0.77   | 20.141  | -3.578 | 1.11E-77  |
| DNAJC4    | ENSG00000 | 35.631 | 407.483 | -3.479 | 1.42E-65  |
| DNAJC5B   | ENSG00000 | 1.16   | 84.958  | -5.315 | 4.94E-46  |
| DNAJC5G   | ENSG00000 | 0.18   | 34.071  | -4.893 | 9.59E-137 |
| DNAL1     | ENSG00000 | 5.21   | 59.1    | -3.275 | 5.02E-59  |
| DNAL4     | ENSG00000 | 16.54  | 87.851  | -2.341 | 6.93E-54  |
| DNALI1    | ENSG00000 | 5.32   | 169.447 | -4.753 | 1.67E-62  |
| DND1P1    | ENSG00000 | 0.44   | 5.3     | -2.129 | 8.52E-30  |
| DNHD1     | ENSG00000 | 3.21   | 78.422  | -4.238 | 2.83E-95  |
| DNM1P41   | ENSG00000 | 0.15   | 3.8     | -2.061 | 1.59E-84  |
| DNM1P46   | ENSG00000 | 0.23   | 18.9    | -4.016 | 1.05E-81  |
| DOC2A     | ENSG00000 | 3.9    | 83.899  | -4.115 | 1.59E-54  |
| DOCK3     | ENSG00000 | 0.84   | 7.72    | -2.245 | 2.78E-60  |
| DOCK4-AS  | ENSG00000 | 0.01   | 3.38    | -2.117 | 4.80E-43  |
| DOCK9-AS  | ENSG00000 | 0.63   | 15.23   | -3.316 | 5.52E-85  |
| DOK6      | ENSG00000 | 0.1    | 5.31    | -2.52  | 2.02E-45  |
| DOK7      | ENSG00000 | 0.45   | 8.78    | -2.754 | 6.01E-65  |
| DOT1L     | ENSG00000 | 18.06  | 139.072 | -2.878 | 1.57E-54  |
| DPCD      | ENSG00000 | 22.529 | 181.144 | -2.953 | 6.08E-49  |
| DPEP1     | ENSG00000 | 3.46   | 78.612  | -4.158 | 3.25E-54  |
| DPEP3     | ENSG00000 | 3.28   | 61.789  | -3.875 | 1.42E-45  |
| DPF3      | ENSG00000 | 0.53   | 19.92   | -3.773 | 1.80E-73  |
| DPP10-AS  | ENSG00000 | 2.5    | 34.059  | -3.324 | 1.76E-42  |
| DPP10-AS  | ENSG00000 | 0      | 4.93    | -2.568 | 8.86E-46  |
| DPP7      | ENSG00000 | 51.911 | 259.573 | -2.3   | 5.42E-48  |
| DPY19L1   | ENSG00000 | 8.07   | 44.28   | -2.32  | 4.84E-50  |
| DPY19L1P1 | ENSG00000 | 0.43   | 5.04    | -2.079 | 2.08E-94  |
| DPY19L2   | ENSG00000 | 2.7    | 47.422  | -3.71  | 1.45E-80  |
| DPY19L2P1 | ENSG00000 | 0.75   | 12.61   | -2.959 | 4.53E-66  |
| DPY19L2P2 | ENSG00000 | 1.61   | 68.96   | -4.744 | 2.16E-71  |
| DPY19L2P3 | ENSG00000 | 0.57   | 5.64    | -2.08  | 2.15E-73  |
| DPY19L2P4 | ENSG00000 | 0.08   | 13.97   | -3.793 | 2.71E-75  |
| DPYSL4    | ENSG00000 | 1.69   | 14.71   | -2.546 | 4.04E-27  |
| DRC1      | ENSG00000 | 0.23   | 37.731  | -4.977 | 1.47E-61  |
| DRC7      | ENSG00000 | 0.14   | 52.691  | -5.558 | 1.19E-72  |
| DRICH1    | ENSG00000 | 0.39   | 59.9    | -5.453 | 1.90E-75  |



|             |           |        |         |        |          |
|-------------|-----------|--------|---------|--------|----------|
| DSCR9       | ENSG00000 | 0.09   | 14.72   | -3.85  | 3.06E-71 |
| DSG1-AS1    | ENSG00000 | 0.09   | 10.41   | -3.388 | 3.47E-49 |
| DTNA        | ENSG00000 | 1      | 10.24   | -2.491 | 1.85E-31 |
| DUSP1       | ENSG00000 | 12.72  | 68.888  | -2.349 | 5.98E-29 |
| DUSP13      | ENSG00000 | 0.3    | 68.669  | -5.744 | 2.13E-74 |
| DUSP15      | ENSG00000 | 1.51   | 309.865 | -6.952 | 9.14E-89 |
| DUSP18      | ENSG00000 | 3.42   | 35.879  | -3.061 | 1.43E-47 |
| DUSP21      | ENSG00000 | 0.03   | 11.79   | -3.634 | 5.01E-66 |
| DUSP26      | ENSG00000 | 0.38   | 4.79    | -2.069 | 6.98E-28 |
| DUSP28      | ENSG00000 | 3.1    | 20.44   | -2.387 | 5.16E-76 |
| DUXAP8      | ENSG00000 | 1.42   | 12      | -2.425 | 1.53E-33 |
| DXO         | ENSG00000 | 12.12  | 92.539  | -2.834 | 5.74E-85 |
| DYDC1       | ENSG00000 | 0.15   | 151.775 | -7.054 | 3.30E-80 |
| DYDC2       | ENSG00000 | 0.49   | 13.03   | -3.235 | 1.45E-43 |
| DYNC2H1     | ENSG00000 | 4.23   | 27.1    | -2.426 | 3.67E-75 |
| DYNC2LI1    | ENSG00000 | 10.73  | 47.212  | -2.039 | 2.47E-70 |
| DYNLRB2     | ENSG00000 | 0.76   | 321.482 | -7.517 | 1.45E-83 |
| DYRK1B      | ENSG00000 | 11.22  | 115.703 | -3.256 | 5.55E-65 |
| DYRK3       | ENSG00000 | 1.08   | 44.27   | -4.444 | 7.85E-72 |
| DZIP1       | ENSG00000 | 3.67   | 77.471  | -4.071 | 1.57E-64 |
| EAF1-AS1    | ENSG00000 | 0.14   | 6.94    | -2.8   | 1.16E-77 |
| EBLN1       | ENSG00000 | 0.02   | 3.59    | -2.17  | 2.26E-60 |
| ECHDC2      | ENSG00000 | 31.349 | 226.096 | -2.812 | 5.50E-77 |
| EDRF1-AS1   | ENSG00000 | 0.36   | 26.44   | -4.335 | 3.20E-79 |
| EEF1DP2     | ENSG00000 | 0      | 4.07    | -2.342 | 1.76E-25 |
| EFCAB1      | ENSG00000 | 0.15   | 47.261  | -5.391 | 6.31E-64 |
| EFCAB10     | ENSG00000 | 2.34   | 25.74   | -3.001 | 2.88E-44 |
| EFCAB11     | ENSG00000 | 9.1    | 71.928  | -2.852 | 6.28E-43 |
| EFCAB12     | ENSG00000 | 0.26   | 12.56   | -3.428 | 6.38E-70 |
| EFCAB13     | ENSG00000 | 1.28   | 27.441  | -3.641 | 1.14E-99 |
| EFCAB14-AS1 | ENSG00000 | 0      | 5.41    | -2.68  | 7.39E-57 |
| EFCAB2      | ENSG00000 | 4.8    | 32.11   | -2.513 | 3.72E-49 |
| EFCAB3      | ENSG00000 | 0.01   | 4.65    | -2.484 | 8.84E-51 |
| EFCAB5      | ENSG00000 | 0.08   | 19.779  | -4.266 | 3.80E-70 |
| EFCAB6      | ENSG00000 | 0.27   | 71.268  | -5.83  | 1.93E-86 |
| EFCAB8      | ENSG00000 | 0.12   | 6.27    | -2.698 | 9.45E-58 |
| EFCAB9      | ENSG00000 | 0      | 12.45   | -3.75  | 9.45E-61 |
| EFEMP2      | ENSG00000 | 13.92  | 65.562  | -2.157 | 1.18E-15 |
| EFHB        | ENSG00000 | 0.84   | 17.93   | -3.363 | 3.05E-67 |
| EFHC1       | ENSG00000 | 4.92   | 36.811  | -2.675 | 7.81E-60 |
| EFHC2       | ENSG00000 | 0.32   | 9.02    | -2.924 | 3.22E-79 |
| EFTUD1P1    | ENSG00000 | 0.18   | 3.82    | -2.03  | 4.82E-63 |
| EGFEM1P     | ENSG00000 | 0.14   | 3.73    | -2.053 | 5.53E-46 |
| EGFLAM-AS1  | ENSG00000 | 0      | 8.27    | -3.213 | 2.84E-57 |
| EGLN2       | ENSG00000 | 73.272 | 332.151 | -2.165 | 8.18E-64 |
| EGR4        | ENSG00000 | 0.06   | 5.13    | -2.532 | 6.50E-76 |
| EHD1        | ENSG00000 | 21.27  | 315.609 | -3.83  | 1.12E-60 |
| EID3        | ENSG00000 | 4.61   | 70.589  | -3.674 | 3.21E-66 |
| EIF3J-AS1   | ENSG00000 | 2.11   | 11.53   | -2.01  | 3.75E-52 |

|            |           |        |          |        |          |
|------------|-----------|--------|----------|--------|----------|
| EIF4BP8    | ENSG00000 | 0      | 4.31     | -2.409 | 6.87E-60 |
| EIF4G3     | ENSG00000 | 18.04  | 85.65    | -2.186 | 2.39E-51 |
| EIF5A2     | ENSG00000 | 2.52   | 46.189   | -3.745 | 1.33E-60 |
| EIF5AL1    | ENSG00000 | 0.94   | 7.71     | -2.167 | 9.72E-36 |
| ELAVL4     | ENSG00000 | 1.02   | 12.51    | -2.742 | 8.28E-33 |
| ELK2AP     | ENSG00000 | 0.02   | 8.4      | -3.204 | 7.53E-70 |
| ELK2BP     | ENSG00000 | 0      | 3.62     | -2.208 | 1.51E-65 |
| ELL        | ENSG00000 | 10.89  | 53.66    | -2.201 | 1.06E-38 |
| ELL3       | ENSG00000 | 1.41   | 33.42    | -3.836 | 9.39E-77 |
| ELOVL2     | ENSG00000 | 1.14   | 7.9      | -2.056 | 4.92E-35 |
| ELOVL2-AS1 | ENSG00000 | 0.07   | 11.14    | -3.504 | 3.04E-86 |
| ELP5       | ENSG00000 | 37.4   | 212.172  | -2.473 | 5.03E-53 |
| EME2       | ENSG00000 | 2.6    | 18.93    | -2.469 | 9.31E-92 |
| EMX1       | ENSG00000 | 0.47   | 6.56     | -2.363 | 4.91E-14 |
| ENKD1      | ENSG00000 | 11.39  | 77       | -2.654 | 5.48E-76 |
| ENKUR      | ENSG00000 | 0.28   | 7.7      | -2.765 | 2.56E-45 |
| ENO1-AS1   | ENSG00000 | 0.38   | 11.18    | -3.142 | 1.40E-64 |
| ENOX1      | ENSG00000 | 0.55   | 12.26    | -3.097 | 1.69E-62 |
| ENPP5      | ENSG00000 | 2.34   | 24.281   | -2.92  | 4.28E-65 |
| STPG1      | ENSG00000 | 5.23   | 40.221   | -2.726 | 1.02E-61 |
| HECW1      | ENSG00000 | 0.31   | 7.69     | -2.73  | 2.12E-45 |
| ICA1       | ENSG00000 | 6.85   | 81.12    | -3.387 | 4.50E-54 |
| NDUFAF7    | ENSG00000 | 20.4   | 94.352   | -2.156 | 3.30E-36 |
| HSPB6      | ENSG00000 | 6.33   | 66.38    | -3.2   | 4.35E-20 |
| PDK4       | ENSG00000 | 2.47   | 14.54    | -2.163 | 6.95E-17 |
| SLC22A16   | ENSG00000 | 0.13   | 26.6     | -4.61  | 6.24E-74 |
| ZMYND10    | ENSG00000 | 0.75   | 575.39   | -8.364 | 2.49E-76 |
| SKAP2      | ENSG00000 | 4.72   | 23.14    | -2.077 | 2.90E-33 |
| SPPL2B     | ENSG00000 | 22.45  | 133.37   | -2.519 | 2.45E-80 |
| YBX2       | ENSG00000 | 5.25   | 930.91   | -7.22  | 3.78E-73 |
| KRT33A     | ENSG00000 | 0      | 3.08     | -2.029 | 7.02E-50 |
| SPATA20    | ENSG00000 | 14.14  | 213.633  | -3.825 | 2.02E-74 |
| FARP2      | ENSG00000 | 8.67   | 51.56    | -2.442 | 3.12E-61 |
| SCIN       | ENSG00000 | 1.06   | 10.5     | -2.481 | 1.95E-30 |
| PRSS21     | ENSG00000 | 3.71   | 136.371  | -4.866 | 9.51E-66 |
| MARK4      | ENSG00000 | 11.82  | 53.958   | -2.1   | 2.50E-61 |
| PAFAH1B1   | ENSG00000 | 49.459 | 270.483  | -2.428 | 8.11E-53 |
| ST7L       | ENSG00000 | 10.22  | 44.68    | -2.025 | 1.43E-66 |
| TKTL1      | ENSG00000 | 2.8    | 129.84   | -5.106 | 3.75E-21 |
| PIGQ       | ENSG00000 | 14.07  | 82.773   | -2.475 | 2.31E-68 |
| NFIX       | ENSG00000 | 3.03   | 15.28    | -2.014 | 1.16E-12 |
| PKD1       | ENSG00000 | 20.43  | 104.589  | -2.301 | 8.52E-55 |
| MAPK8IP2   | ENSG00000 | 2.27   | 13.72    | -2.17  | 5.14E-45 |
| POMT2      | ENSG00000 | 21.84  | 118.882  | -2.392 | 3.50E-69 |
| MLXIPL     | ENSG00000 | 1.15   | 57.972   | -4.778 | 5.36E-81 |
| HHATL      | ENSG00000 | 0.05   | 10.76    | -3.485 | 4.12E-91 |
| PHF7       | ENSG00000 | 7.74   | 1705.406 | -7.609 | 2.76E-84 |
| FUZ        | ENSG00000 | 13.66  | 132.66   | -3.189 | 3.02E-68 |
| SLC6A13    | ENSG00000 | 0.2    | 5.93     | -2.53  | 2.52E-37 |

|          |           |        |         |        |          |
|----------|-----------|--------|---------|--------|----------|
| PRSS3    | ENSG00000 | 0.12   | 8.68    | -3.112 | 6.48E-33 |
| SCMH1    | ENSG00000 | 9.17   | 51.421  | -2.366 | 1.84E-60 |
| ZBTB32   | ENSG00000 | 0.93   | 93.002  | -5.606 | 1.78E-77 |
| SEMA3B   | ENSG00000 | 2.1    | 26.451  | -3.146 | 5.26E-36 |
| UBR7     | ENSG00000 | 14.05  | 63.412  | -2.098 | 4.96E-39 |
| MAMLD1   | ENSG00000 | 0.74   | 28.391  | -4.078 | 1.06E-86 |
| MTMR11   | ENSG00000 | 3.3    | 23.94   | -2.536 | 5.74E-39 |
| RGPD5    | ENSG00000 | 3.54   | 22.841  | -2.393 | 1.07E-33 |
| RUFY3    | ENSG00000 | 14.35  | 72.629  | -2.262 | 1.95E-70 |
| SAMD4A   | ENSG00000 | 2.34   | 250.557 | -6.235 | 1.45E-69 |
| PLEKHB1  | ENSG00000 | 3.61   | 47.339  | -3.39  | 2.23E-49 |
| NRXN3    | ENSG00000 | 1.56   | 10.21   | -2.131 | 2.93E-29 |
| FHL1     | ENSG00000 | 7.48   | 80.912  | -3.272 | 1.02E-35 |
| GRAMD1B  | ENSG00000 | 1.53   | 18.95   | -2.979 | 8.29E-68 |
| GLRX2    | ENSG00000 | 4.75   | 65.739  | -3.537 | 1.54E-59 |
| TOMM34   | ENSG00000 | 31.701 | 154.161 | -2.246 | 5.17E-56 |
| TBPL1    | ENSG00000 | 31.53  | 159.001 | -2.298 | 4.26E-52 |
| IFT88    | ENSG00000 | 4.78   | 68.54   | -3.589 | 4.53E-77 |
| LRRC7    | ENSG00000 | 0.28   | 5.05    | -2.241 | 3.63E-51 |
| MYOM2    | ENSG00000 | 5.05   | 35.06   | -2.575 | 3.16E-19 |
| USP2     | ENSG00000 | 0.89   | 115.703 | -5.948 | 3.71E-91 |
| RAI14    | ENSG00000 | 8.2    | 42.109  | -2.228 | 3.39E-35 |
| SOX30    | ENSG00000 | 0.26   | 107.083 | -6.423 | 4.89E-83 |
| RAB27B   | ENSG00000 | 0.08   | 4.18    | -2.262 | 2.37E-38 |
| FAM65C   | ENSG00000 | 1.22   | 17.65   | -3.071 | 3.27E-68 |
| SPATA7   | ENSG00000 | 7.74   | 68.199  | -2.985 | 1.41E-56 |
| ZPBP     | ENSG00000 | 0.1    | 136.153 | -6.962 | 6.88E-93 |
| TG       | ENSG00000 | 0.5    | 6.76    | -2.371 | 1.63E-51 |
| ZIC2     | ENSG00000 | 0.65   | 6.27    | -2.14  | 7.21E-08 |
| MAGEC2   | ENSG00000 | 1.6    | 22.86   | -3.198 | 9.14E-22 |
| WDR37    | ENSG00000 | 3.97   | 26.591  | -2.473 | 8.60E-62 |
| SCML1    | ENSG00000 | 1.91   | 39.159  | -3.787 | 8.26E-89 |
| GUCA1A   | ENSG00000 | 5.4    | 36.021  | -2.532 | 1.85E-25 |
| EPN3     | ENSG00000 | 0.21   | 4.1     | -2.076 | 4.23E-33 |
| LAMC3    | ENSG00000 | 10.42  | 55.211  | -2.299 | 5.82E-26 |
| FAM160A2 | ENSG00000 | 18.491 | 91.62   | -2.249 | 1.09E-85 |
| MCF2L2   | ENSG00000 | 1.13   | 8.31    | -2.128 | 2.70E-28 |
| ENTPD2   | ENSG00000 | 0.87   | 7.83    | -2.239 | 3.27E-29 |
| SPO11    | ENSG00000 | 0      | 6.91    | -2.984 | 1.78E-86 |
| KCNH2    | ENSG00000 | 8.63   | 52.76   | -2.481 | 1.31E-45 |
| ITIH4    | ENSG00000 | 3.76   | 28.769  | -2.645 | 2.51E-39 |
| PHF21B   | ENSG00000 | 1.13   | 8.47    | -2.152 | 2.33E-53 |
| PIGV     | ENSG00000 | 6.54   | 46.71   | -2.662 | 3.34E-68 |
| SPAG4    | ENSG00000 | 5.67   | 59.42   | -3.179 | 2.18E-64 |
| SLC6A16  | ENSG00000 | 1.29   | 92.378  | -5.35  | 6.57E-87 |
| SPHK2    | ENSG00000 | 4.92   | 35.809  | -2.636 | 8.56E-51 |
| HAGH     | ENSG00000 | 26.37  | 148.713 | -2.452 | 1.09E-72 |
| LIMCH1   | ENSG00000 | 1.09   | 12.48   | -2.689 | 6.93E-36 |
| SPA17    | ENSG00000 | 5.99   | 296.07  | -5.409 | 3.08E-64 |

|          |           |        |         |        |           |
|----------|-----------|--------|---------|--------|-----------|
| WISP2    | ENSG00000 | 0.5    | 37.629  | -4.687 | 4.52E-35  |
| SUGP2    | ENSG00000 | 35.15  | 187.103 | -2.379 | 4.57E-94  |
| SLC12A2  | ENSG00000 | 2.08   | 13.58   | -2.243 | 7.97E-39  |
| EYA2     | ENSG00000 | 0.86   | 7.07    | -2.117 | 4.83E-25  |
| SNCAIP   | ENSG00000 | 0.86   | 9.74    | -2.53  | 9.03E-26  |
| PMS1     | ENSG00000 | 11.22  | 62.141  | -2.369 | 5.59E-53  |
| IPO5     | ENSG00000 | 54.681 | 223.572 | -2.012 | 5.49E-43  |
| ROPN1    | ENSG00000 | 0.06   | 197.416 | -7.548 | 2.27E-83  |
| SNAP91   | ENSG00000 | 0.56   | 12.31   | -3.093 | 2.48E-54  |
| SEC61A2  | ENSG00000 | 6.07   | 31.41   | -2.197 | 3.23E-64  |
| TLE2     | ENSG00000 | 7.06   | 43.209  | -2.455 | 1.80E-26  |
| PDE4A    | ENSG00000 | 5.76   | 36.501  | -2.472 | 1.01E-35  |
| ZMYND12  | ENSG00000 | 0.96   | 34.589  | -4.183 | 6.54E-69  |
| STAG3    | ENSG00000 | 12.53  | 182.353 | -3.76  | 3.04E-74  |
| PFKP     | ENSG00000 | 37.77  | 188.196 | -2.287 | 3.23E-22  |
| PRKCZ    | ENSG00000 | 15.53  | 120.684 | -2.88  | 2.84E-47  |
| HDAC4    | ENSG00000 | 3.25   | 27.401  | -2.74  | 5.84E-45  |
| REEP1    | ENSG00000 | 3.89   | 48.741  | -3.347 | 1.61E-61  |
| TTC7A    | ENSG00000 | 11.89  | 121.582 | -3.249 | 3.14E-73  |
| SIRT2    | ENSG00000 | 16.03  | 95.749  | -2.506 | 4.61E-74  |
| PYGM     | ENSG00000 | 0.9    | 11.99   | -2.773 | 5.28E-63  |
| PAGE1    | ENSG00000 | 0      | 21.69   | -4.504 | 2.31E-91  |
| MAST4    | ENSG00000 | 1.92   | 19.401  | -2.805 | 2.38E-61  |
| SDK2     | ENSG00000 | 2.07   | 16.05   | -2.473 | 1.84E-41  |
| FSTL3    | ENSG00000 | 7.61   | 94.202  | -3.467 | 3.43E-73  |
| FRMPD1   | ENSG00000 | 0.46   | 11.16   | -3.058 | 3.70E-71  |
| ST6GALNA | ENSG00000 | 2.01   | 146.615 | -5.616 | 8.85E-68  |
| PTPN21   | ENSG00000 | 4.05   | 32.869  | -2.746 | 4.88E-68  |
| RHOBTB1  | ENSG00000 | 1.27   | 34.561  | -3.969 | 3.74E-62  |
| MOV10L1  | ENSG00000 | 0.63   | 59.73   | -5.219 | 2.05E-93  |
| FNDC8    | ENSG00000 | 0.1    | 115.559 | -6.727 | 2.57E-68  |
| PPP2R2C  | ENSG00000 | 1.26   | 9.11    | -2.161 | 1.63E-38  |
| TUBE1    | ENSG00000 | 6.63   | 30.271  | -2.035 | 8.16E-61  |
| KCNQ2    | ENSG00000 | 4.11   | 26.119  | -2.408 | 1.05E-26  |
| VPS9D1   | ENSG00000 | 4.89   | 26.779  | -2.238 | 2.24E-54  |
| WDR62    | ENSG00000 | 18.17  | 98.489  | -2.376 | 4.23E-26  |
| SEC31B   | ENSG00000 | 2.49   | 32.869  | -3.279 | 2.76E-109 |
| TUBA3D   | ENSG00000 | 3.56   | 293.597 | -6.014 | 4.50E-50  |
| MKRN2    | ENSG00000 | 16.12  | 71.5    | -2.082 | 4.20E-56  |
| MBNL3    | ENSG00000 | 1.77   | 23.88   | -3.167 | 5.78E-58  |
| SPAG6    | ENSG00000 | 0.74   | 76.5    | -5.477 | 1.32E-73  |
| LRCH4    | ENSG00000 | 33.639 | 211.497 | -2.617 | 2.23E-107 |
| FAM76B   | ENSG00000 | 8.07   | 61.72   | -2.79  | 1.10E-66  |
| NAALAD2  | ENSG00000 | 2.45   | 21.61   | -2.712 | 5.08E-44  |
| FKBP6    | ENSG00000 | 0.48   | 81.21   | -5.796 | 1.07E-77  |
| SMC1B    | ENSG00000 | 0.16   | 30.391  | -4.758 | 3.01E-80  |
| MAP2     | ENSG00000 | 0.98   | 8.33    | -2.236 | 3.50E-29  |
| PIAS2    | ENSG00000 | 8.32   | 116.033 | -3.65  | 3.30E-61  |
| LAMP3    | ENSG00000 | 3.5    | 18.77   | -2.135 | 4.78E-18  |

|           |           |       |         |        |          |
|-----------|-----------|-------|---------|--------|----------|
| NEBL      | ENSG00000 | 1.33  | 28.499  | -3.662 | 6.15E-37 |
| ZCWPW1    | ENSG00000 | 6.96  | 115.88  | -3.876 | 7.98E-73 |
| PKD2L2    | ENSG00000 | 0.08  | 8.49    | -3.135 | 4.53E-80 |
| TP53INP2  | ENSG00000 | 9.28  | 50.348  | -2.32  | 5.48E-54 |
| MYH7B     | ENSG00000 | 0.89  | 30.53   | -4.06  | 1.12E-60 |
| TOLLIP    | ENSG00000 | 16.27 | 102.828 | -2.588 | 1.31E-84 |
| TNS1      | ENSG00000 | 6.31  | 30.22   | -2.095 | 1.36E-17 |
| LIPE      | ENSG00000 | 5.04  | 96.85   | -4.018 | 5.58E-65 |
| LRRC16A   | ENSG00000 | 4.32  | 22.54   | -2.146 | 1.45E-54 |
| EPHA6     | ENSG00000 | 0.27  | 24.09   | -4.304 | 6.73E-62 |
| RFX3      | ENSG00000 | 1.21  | 23.86   | -3.492 | 2.39E-58 |
| RDH8      | ENSG00000 | 0.02  | 4.46    | -2.42  | 3.09E-43 |
| PIH1D3    | ENSG00000 | 0     | 13.77   | -3.885 | 1.01E-71 |
| MOK       | ENSG00000 | 6.24  | 112.477 | -3.97  | 8.38E-70 |
| SMARCD3   | ENSG00000 | 8.29  | 59.309  | -2.699 | 1.01E-34 |
| PGR       | ENSG00000 | 0.06  | 3.62    | -2.124 | 2.01E-74 |
| EPB41L3   | ENSG00000 | 5.66  | 100.872 | -3.935 | 4.00E-79 |
| TRPM3     | ENSG00000 | 0.1   | 6.05    | -2.68  | 2.57E-35 |
| ULK2      | ENSG00000 | 6.02  | 37.801  | -2.467 | 6.01E-55 |
| SLC27A5   | ENSG00000 | 7.53  | 56.172  | -2.745 | 5.32E-59 |
| GCKR      | ENSG00000 | 0.32  | 8.64    | -2.869 | 2.51E-80 |
| MAPRE3    | ENSG00000 | 6.77  | 95.18   | -3.63  | 2.61E-90 |
| OVGP1     | ENSG00000 | 1.42  | 13.03   | -2.535 | 8.37E-72 |
| ZNF213    | ENSG00000 | 5.17  | 38.91   | -2.693 | 7.72E-67 |
| TTC39A    | ENSG00000 | 5.35  | 77.788  | -3.633 | 1.48E-55 |
| USP40     | ENSG00000 | 8.07  | 35.461  | -2.007 | 6.32E-70 |
| NME8      | ENSG00000 | 0.68  | 15.74   | -3.317 | 1.00E-38 |
| EPDR1     | ENSG00000 | 1.99  | 11.15   | -2.023 | 2.61E-33 |
| FAT2      | ENSG00000 | 0.09  | 16.14   | -3.975 | 2.12E-54 |
| ERO1LB    | ENSG00000 | 2.51  | 16.53   | -2.32  | 3.41E-61 |
| PPEF1     | ENSG00000 | 0.52  | 17.59   | -3.612 | 2.21E-68 |
| MT3       | ENSG00000 | 0.54  | 8.49    | -2.623 | 9.09E-31 |
| GNAO1     | ENSG00000 | 3.49  | 24.65   | -2.514 | 1.83E-53 |
| RFX2      | ENSG00000 | 5.19  | 88.431  | -3.853 | 3.58E-68 |
| GP6       | ENSG00000 | 0.15  | 3.78    | -2.055 | 9.36E-54 |
| GNA11     | ENSG00000 | 15.35 | 77.551  | -2.264 | 1.42E-67 |
| KIF9      | ENSG00000 | 16.26 | 90.327  | -2.404 | 4.55E-33 |
| PPP1R13B  | ENSG00000 | 10.61 | 70.83   | -2.629 | 8.86E-56 |
| TESC      | ENSG00000 | 5.53  | 50.209  | -2.971 | 7.41E-49 |
| SIRT4     | ENSG00000 | 1.22  | 9.47    | -2.238 | 1.33E-51 |
| OTUB2     | ENSG00000 | 0.74  | 17.64   | -3.421 | 2.29E-51 |
| THPO      | ENSG00000 | 0.29  | 4.71    | -2.146 | 8.69E-29 |
| TF        | ENSG00000 | 5.1   | 35.451  | -2.579 | 5.01E-17 |
| MYO15A    | ENSG00000 | 1.04  | 31.491  | -3.993 | 7.77E-88 |
| ZFHX4     | ENSG00000 | 0.15  | 5.36    | -2.467 | 8.60E-30 |
| RPGRIP1   | ENSG00000 | 1.96  | 53.548  | -4.204 | 1.48E-51 |
| TEKT2     | ENSG00000 | 0.65  | 97.531  | -5.9   | 2.51E-58 |
| XXbac-B46 | ENSG00000 | 3.6   | 19.38   | -2.147 | 1.12E-51 |
| LRRFIP2   | ENSG00000 | 18.69 | 94.208  | -2.274 | 1.30E-69 |

|           |           |       |         |        |           |
|-----------|-----------|-------|---------|--------|-----------|
| NXPE1     | ENSG00000 | 0     | 4.66    | -2.501 | 2.55E-45  |
| TDRD1     | ENSG00000 | 0.54  | 7.57    | -2.476 | 4.78E-66  |
| MYO3A     | ENSG00000 | 0.97  | 7.74    | -2.149 | 1.67E-41  |
| PALMD     | ENSG00000 | 2.28  | 12.26   | -2.015 | 4.67E-34  |
| IZUMO4    | ENSG00000 | 1.42  | 723.374 | -8.226 | 2.00E-100 |
| P2RX6     | ENSG00000 | 0.5   | 11.02   | -3.002 | 3.89E-96  |
| SLC7A4    | ENSG00000 | 2.97  | 19.48   | -2.367 | 7.94E-32  |
| UPB1      | ENSG00000 | 0.23  | 5.42    | -2.384 | 2.20E-98  |
| YPEL1     | ENSG00000 | 2.01  | 105.682 | -5.147 | 2.24E-66  |
| SLC35E4   | ENSG00000 | 2.5   | 28.46   | -3.073 | 2.25E-55  |
| GGA1      | ENSG00000 | 35.37 | 281.794 | -2.959 | 1.67E-92  |
| GGTLC2    | ENSG00000 | 0     | 8.19    | -3.2   | 1.34E-35  |
| SOX10     | ENSG00000 | 0.15  | 3.78    | -2.055 | 4.49E-39  |
| RSPH14    | ENSG00000 | 0.83  | 32.619  | -4.199 | 6.62E-77  |
| PPP6R2    | ENSG00000 | 23.76 | 114.332 | -2.22  | 1.64E-86  |
| SBF1      | ENSG00000 | 33.76 | 182.746 | -2.402 | 9.70E-75  |
| TLL1      | ENSG00000 | 3.88  | 19.91   | -2.099 | 1.46E-48  |
| KCTD17    | ENSG00000 | 13.27 | 77.799  | -2.465 | 5.79E-61  |
| LRRC74A   | ENSG00000 | 0.05  | 21.4    | -4.415 | 3.64E-72  |
| SAMD15    | ENSG00000 | 0.57  | 18.76   | -3.654 | 1.29E-67  |
| PPM1A     | ENSG00000 | 21.73 | 95.239  | -2.082 | 3.04E-49  |
| ZC3H14    | ENSG00000 | 44.87 | 223.308 | -2.29  | 3.43E-44  |
| NFATC4    | ENSG00000 | 23.95 | 115.679 | -2.225 | 7.44E-40  |
| NDRG3     | ENSG00000 | 15.27 | 89.877  | -2.482 | 3.73E-57  |
| MRGBP     | ENSG00000 | 11.86 | 64.128  | -2.34  | 1.41E-63  |
| TCFL5     | ENSG00000 | 9.35  | 66.851  | -2.713 | 1.71E-58  |
| SPEF1     | ENSG00000 | 0.3   | 21.711  | -4.127 | 9.17E-64  |
| SEL1L2    | ENSG00000 | 0.07  | 12.4    | -3.647 | 3.63E-70  |
| SLC52A3   | ENSG00000 | 4.85  | 52.559  | -3.195 | 7.52E-62  |
| PDYN      | ENSG00000 | 0.01  | 4.88    | -2.541 | 5.17E-44  |
| MROH8     | ENSG00000 | 3.32  | 36.041  | -3.1   | 1.52E-64  |
| EPPIN     | ENSG00000 | 0.17  | 102.167 | -6.462 | 2.83E-90  |
| MAP1LC3A  | ENSG00000 | 17.14 | 97.578  | -2.442 | 3.96E-75  |
| ZNF516    | ENSG00000 | 7.04  | 48.341  | -2.617 | 1.07E-73  |
| MYOM1     | ENSG00000 | 0.99  | 10.63   | -2.547 | 2.98E-66  |
| LIPG      | ENSG00000 | 1.24  | 9.68    | -2.253 | 8.53E-19  |
| NOL4      | ENSG00000 | 0.03  | 26.25   | -4.726 | 3.41E-66  |
| POLI      | ENSG00000 | 7.21  | 54.041  | -2.745 | 3.30E-94  |
| VSIG1     | ENSG00000 | 0.28  | 34.391  | -4.789 | 6.79E-89  |
| RHOXF1    | ENSG00000 | 0.91  | 19.66   | -3.435 | 1.60E-64  |
| PAGE4     | ENSG00000 | 0.1   | 6.61    | -2.79  | 2.21E-30  |
| MCF2      | ENSG00000 | 0.13  | 18.9    | -4.138 | 2.43E-128 |
| SMARCA1   | ENSG00000 | 4.52  | 51.581  | -3.252 | 4.62E-31  |
| PPP1R2P9  | ENSG00000 | 1.36  | 100.148 | -5.422 | 4.19E-68  |
| PCYT1B    | ENSG00000 | 1.34  | 16.99   | -2.943 | 1.38E-51  |
| TAF7L     | ENSG00000 | 0.25  | 39.7    | -5.025 | 1.09E-121 |
| KIAA0226L | ENSG00000 | 2.89  | 27.149  | -2.855 | 8.85E-66  |
| KLF5      | ENSG00000 | 8.18  | 36.061  | -2.013 | 1.53E-19  |
| UGGT2     | ENSG00000 | 3.89  | 20.79   | -2.156 | 6.25E-57  |

|          |           |        |         |        |          |
|----------|-----------|--------|---------|--------|----------|
| FLT1     | ENSG00000 | 2.55   | 19.03   | -2.496 | 1.30E-37 |
| KATNAL1  | ENSG00000 | 2.97   | 20.72   | -2.452 | 3.43E-54 |
| INTS6    | ENSG00000 | 7.14   | 53.541  | -2.744 | 6.70E-84 |
| MEDAG    | ENSG00000 | 0.54   | 6.04    | -2.193 | 1.90E-46 |
| HSF4     | ENSG00000 | 3.69   | 36.87   | -3.013 | 2.79E-51 |
| TSNAXIP1 | ENSG00000 | 1.59   | 57.328  | -4.493 | 1.66E-84 |
| PAR6A    | ENSG00000 | 1.9    | 54.518  | -4.259 | 1.50E-66 |
| ZNF821   | ENSG00000 | 5.79   | 44.721  | -2.751 | 1.91E-56 |
| PRSS54   | ENSG00000 | 0      | 55.41   | -5.818 | 2.26E-70 |
| NDRG4    | ENSG00000 | 6.11   | 109.599 | -3.959 | 1.45E-74 |
| SMPD3    | ENSG00000 | 1.36   | 12.17   | -2.48  | 1.01E-74 |
| NECAB2   | ENSG00000 | 0.72   | 13.43   | -3.069 | 4.72E-63 |
| WFDC1    | ENSG00000 | 1.02   | 15.5    | -3.03  | 1.02E-32 |
| FAM173A  | ENSG00000 | 15.76  | 92.219  | -2.476 | 1.31E-48 |
| RHBDL1   | ENSG00000 | 0.82   | 7.84    | -2.28  | 2.37E-73 |
| TMC5     | ENSG00000 | 0.88   | 10.34   | -2.593 | 1.29E-36 |
| SLC6A2   | ENSG00000 | 0.11   | 5.54    | -2.559 | 1.15E-65 |
| IQCH     | ENSG00000 | 1.39   | 11.54   | -2.391 | 3.49E-49 |
| SLC30A4  | ENSG00000 | 1.01   | 8.9     | -2.3   | 2.17E-68 |
| MYEF2    | ENSG00000 | 4.59   | 61.991  | -3.494 | 2.63E-66 |
| IL7      | ENSG00000 | 0.32   | 5.97    | -2.401 | 7.37E-55 |
| TRPS1    | ENSG00000 | 1.51   | 10.95   | -2.251 | 7.63E-31 |
| SPAG1    | ENSG00000 | 2.19   | 12.28   | -2.058 | 3.45E-31 |
| GML      | ENSG00000 | 0      | 3.35    | -2.121 | 1.52E-67 |
| NEFM     | ENSG00000 | 0.42   | 23.36   | -4.101 | 3.02E-37 |
| FGL1     | ENSG00000 | 0.28   | 6.24    | -2.5   | 1.50E-39 |
| TULP2    | ENSG00000 | 1.13   | 50.331  | -4.591 | 9.60E-56 |
| NFKBIB   | ENSG00000 | 25.81  | 107.813 | -2.021 | 1.87E-36 |
| LHB      | ENSG00000 | 0.52   | 6.26    | -2.256 | 3.47E-52 |
| PEX11G   | ENSG00000 | 2.3    | 38.561  | -3.584 | 3.47E-79 |
| LYL1     | ENSG00000 | 4.05   | 27.83   | -2.513 | 3.22E-42 |
| RSPH6A   | ENSG00000 | 0.01   | 40.26   | -5.352 | 1.17E-71 |
| VRK3     | ENSG00000 | 26.77  | 218.183 | -2.981 | 2.19E-59 |
| MED26    | ENSG00000 | 8.63   | 48.12   | -2.351 | 2.78E-59 |
| SLC1A6   | ENSG00000 | 1.37   | 38.401  | -4.055 | 6.91E-73 |
| OVOL3    | ENSG00000 | 0.13   | 4.77    | -2.352 | 4.50E-69 |
| ZFR2     | ENSG00000 | 6.46   | 31.219  | -2.111 | 1.55E-29 |
| TJP3     | ENSG00000 | 14.91  | 102.707 | -2.705 | 8.70E-20 |
| FZR1     | ENSG00000 | 21.08  | 93.131  | -2.092 | 2.07E-66 |
| ICAM5    | ENSG00000 | 0.25   | 6.16    | -2.518 | 4.47E-70 |
| ZNRF4    | ENSG00000 | 0      | 160.574 | -7.336 | 1.34E-75 |
| SYNGR4   | ENSG00000 | 0.24   | 69.329  | -5.826 | 1.21E-88 |
| THEG     | ENSG00000 | 0.21   | 57.209  | -5.588 | 3.30E-63 |
| MAST1    | ENSG00000 | 2.19   | 13.97   | -2.23  | 5.39E-34 |
| PDE4C    | ENSG00000 | 1.55   | 9.54    | -2.047 | 1.62E-43 |
| ISYNA1   | ENSG00000 | 76.802 | 497.24  | -2.679 | 1.69E-65 |
| ETV2     | ENSG00000 | 1      | 24.33   | -3.663 | 2.50E-60 |
| GAPDHS   | ENSG00000 | 0.08   | 387.646 | -8.491 | 1.23E-76 |
| GRIK5    | ENSG00000 | 1.26   | 66.768  | -4.906 | 4.46E-77 |

|          |           |        |          |        |          |
|----------|-----------|--------|----------|--------|----------|
| RNF32    | ENSG00000 | 2.42   | 87.25    | -4.69  | 3.30E-74 |
| IQCE     | ENSG00000 | 6.97   | 69.69    | -3.149 | 1.15E-54 |
| SPAM1    | ENSG00000 | 0.1    | 12.71    | -3.64  | 2.01E-50 |
| FSCN3    | ENSG00000 | 0.15   | 130.471  | -6.837 | 2.11E-73 |
| MOSPD3   | ENSG00000 | 17.701 | 88.199   | -2.254 | 8.65E-49 |
| FBXO24   | ENSG00000 | 0.88   | 120.333  | -6.012 | 7.55E-77 |
| PPP1R17  | ENSG00000 | 0.04   | 3.44     | -2.094 | 4.88E-28 |
| TBL2     | ENSG00000 | 28.999 | 259.285  | -3.117 | 2.92E-57 |
| GALNTL5  | ENSG00000 | 0.02   | 40.19    | -5.336 | 1.83E-66 |
| SPATA6L  | ENSG00000 | 0.42   | 24.931   | -4.191 | 1.09E-73 |
| OGN      | ENSG00000 | 0.53   | 5.97     | -2.188 | 4.21E-04 |
| TLE4     | ENSG00000 | 8.67   | 147.994  | -3.946 | 4.00E-69 |
| TESK1    | ENSG00000 | 23.65  | 108.337  | -2.149 | 9.83E-66 |
| SH3GL2   | ENSG00000 | 0.7    | 6.97     | -2.229 | 1.63E-76 |
| PTGDS    | ENSG00000 | 97.032 | 4550.154 | -5.537 | 3.13E-42 |
| SFXN3    | ENSG00000 | 6.57   | 30.13    | -2.04  | 2.73E-31 |
| MTPAP    | ENSG00000 | 9.06   | 83.458   | -3.07  | 1.55E-48 |
| KRT23    | ENSG00000 | 0.37   | 30.721   | -4.533 | 2.92E-43 |
| GIT1     | ENSG00000 | 30.11  | 131.461  | -2.09  | 1.25E-57 |
| RUNDC3A  | ENSG00000 | 1.89   | 38.929   | -3.788 | 2.84E-56 |
| SGCA     | ENSG00000 | 0.53   | 34.09    | -4.519 | 1.07E-64 |
| RND2     | ENSG00000 | 10.57  | 49.261   | -2.119 | 2.00E-33 |
| MYH3     | ENSG00000 | 2.16   | 51.189   | -4.046 | 4.74E-56 |
| KIAA1211 | ENSG00000 | 0.97   | 35.5     | -4.212 | 1.10E-55 |
| MAPK10   | ENSG00000 | 0.96   | 39.229   | -4.359 | 4.01E-66 |
| INPP4B   | ENSG00000 | 0.85   | 42.039   | -4.54  | 2.33E-67 |
| SOD3     | ENSG00000 | 7.13   | 99.339   | -3.625 | 8.97E-52 |
| HGFAC    | ENSG00000 | 0.09   | 18.93    | -4.193 | 4.28E-83 |
| LRP2BP   | ENSG00000 | 0.64   | 11.05    | -2.877 | 1.63E-70 |
| PPARGC1A | ENSG00000 | 0.18   | 9.45     | -3.147 | 4.63E-61 |
| ZBTB16   | ENSG00000 | 0.39   | 10.5     | -3.049 | 7.53E-70 |
| P2RX3    | ENSG00000 | 0.05   | 10.3     | -3.428 | 4.11E-53 |
| RNF141   | ENSG00000 | 9.44   | 118.094  | -3.512 | 6.34E-65 |
| GALNT18  | ENSG00000 | 2.12   | 18.83    | -2.668 | 4.19E-47 |
| MADD     | ENSG00000 | 14.66  | 64.248   | -2.059 | 3.91E-71 |
| PTPMT1   | ENSG00000 | 25.52  | 140.808  | -2.419 | 1.85E-49 |
| SLC22A18 | ENSG00000 | 7.19   | 50.839   | -2.662 | 2.34E-55 |
| SOX6     | ENSG00000 | 0.16   | 20.97    | -4.243 | 1.98E-74 |
| NUP98    | ENSG00000 | 38.95  | 170.295  | -2.1   | 1.25E-51 |
| PRPF40B  | ENSG00000 | 13.72  | 62.15    | -2.101 | 3.37E-67 |
| IL23A    | ENSG00000 | 3      | 23.03    | -2.587 | 6.10E-26 |
| LIN7A    | ENSG00000 | 0.23   | 25.06    | -4.405 | 1.46E-65 |
| TNS2     | ENSG00000 | 9.57   | 56.16    | -2.435 | 1.21E-21 |
| GSG1     | ENSG00000 | 0.33   | 544.352  | -8.68  | 6.35E-61 |
| HCFC2    | ENSG00000 | 2.86   | 41.469   | -3.46  | 5.58E-82 |
| RFX4     | ENSG00000 | 0.05   | 68.341   | -6.045 | 2.94E-76 |
| MAK      | ENSG00000 | 0.15   | 8.22     | -3.003 | 7.65E-61 |
| OPRM1    | ENSG00000 | 0      | 5.55     | -2.711 | 1.82E-57 |
| SLC26A8  | ENSG00000 | 0.12   | 44.12    | -5.332 | 1.27E-79 |



|          |           |        |         |        |           |
|----------|-----------|--------|---------|--------|-----------|
| SAYSD1   | ENSG00000 | 16.05  | 78.042  | -2.213 | 2.56E-51  |
| ZNF451   | ENSG00000 | 11.71  | 51.25   | -2.039 | 2.07E-45  |
| FHL5     | ENSG00000 | 0.3    | 80.147  | -5.964 | 4.82E-106 |
| HDGFL1   | ENSG00000 | 18.03  | 116.726 | -2.629 | 4.02E-21  |
| WASF1    | ENSG00000 | 8.72   | 78.367  | -3.03  | 1.22E-53  |
| PHF1     | ENSG00000 | 43.32  | 308.023 | -2.802 | 1.91E-95  |
| PACRG    | ENSG00000 | 0.39   | 40.689  | -4.907 | 2.51E-75  |
| PDE10A   | ENSG00000 | 0.26   | 4.35    | -2.086 | 4.49E-48  |
| SMOC2    | ENSG00000 | 5.61   | 49.621  | -2.937 | 2.18E-27  |
| FAM120B  | ENSG00000 | 5.85   | 28.829  | -2.123 | 1.27E-55  |
| WISP3    | ENSG00000 | 0.16   | 6.01    | -2.595 | 7.80E-61  |
| PCDHB2   | ENSG00000 | 0.78   | 7.09    | -2.184 | 9.15E-29  |
| NME5     | ENSG00000 | 1.07   | 63.03   | -4.951 | 4.71E-77  |
| PCDHB5   | ENSG00000 | 0.26   | 4.08    | -2.011 | 1.40E-16  |
| PCDHB15  | ENSG00000 | 0.74   | 6.49    | -2.106 | 8.24E-59  |
| SLC27A6  | ENSG00000 | 0.33   | 7.39    | -2.657 | 4.17E-39  |
| SLC12A7  | ENSG00000 | 7.71   | 46      | -2.432 | 7.84E-50  |
| IL5      | ENSG00000 | 0.03   | 5.04    | -2.552 | 2.22E-71  |
| PFKFB4   | ENSG00000 | 8.13   | 37.46   | -2.075 | 2.21E-51  |
| PRKAR2A  | ENSG00000 | 8.83   | 105.492 | -3.437 | 1.66E-54  |
| HES1     | ENSG00000 | 3.44   | 17.45   | -2.055 | 8.87E-09  |
| IFT57    | ENSG00000 | 16.41  | 167.834 | -3.278 | 4.18E-54  |
| IQCG     | ENSG00000 | 6.27   | 84.488  | -3.556 | 1.83E-87  |
| MORC1    | ENSG00000 | 0.09   | 8.1     | -3.062 | 1.82E-78  |
| ROPN1B   | ENSG00000 | 0.22   | 295.906 | -7.927 | 4.52E-84  |
| KIAA1257 | ENSG00000 | 1.56   | 28.41   | -3.522 | 1.43E-56  |
| NEK11    | ENSG00000 | 1.44   | 24.63   | -3.393 | 1.16E-78  |
| HEMK1    | ENSG00000 | 8.06   | 38.249  | -2.115 | 1.34E-58  |
| GORASP1  | ENSG00000 | 14.34  | 64.789  | -2.101 | 1.03E-66  |
| PEX5L    | ENSG00000 | 0.08   | 3.36    | -2.013 | 6.10E-73  |
| PLCH1    | ENSG00000 | 0.4    | 13.33   | -3.356 | 2.35E-54  |
| ZBTB47   | ENSG00000 | 1.57   | 11.5    | -2.282 | 8.72E-30  |
| TNNC1    | ENSG00000 | 1.14   | 13.66   | -2.776 | 4.59E-15  |
| IL1A     | ENSG00000 | 0.14   | 8.86    | -3.113 | 7.82E-85  |
| KCNIP3   | ENSG00000 | 1.45   | 15.12   | -2.718 | 8.89E-55  |
| TP53I3   | ENSG00000 | 7.87   | 53.039  | -2.607 | 1.38E-29  |
| SLC30A3  | ENSG00000 | 1.19   | 60.241  | -4.805 | 1.08E-119 |
| ITGB6    | ENSG00000 | 1.14   | 77.541  | -5.198 | 4.27E-62  |
| PDE1A    | ENSG00000 | 1.12   | 27.68   | -3.758 | 2.56E-51  |
| REEP6    | ENSG00000 | 36.579 | 394.997 | -3.397 | 9.00E-68  |
| PCSK4    | ENSG00000 | 4.02   | 198.156 | -5.31  | 8.01E-84  |
| GRB14    | ENSG00000 | 2.18   | 44.289  | -3.832 | 1.92E-72  |
| GALNT3   | ENSG00000 | 1.94   | 14.73   | -2.42  | 2.96E-29  |
| SLC9A2   | ENSG00000 | 0.04   | 4.77    | -2.472 | 1.03E-71  |
| RMDN2    | ENSG00000 | 2.64   | 26.31   | -2.907 | 2.61E-64  |
| PLEKHA3  | ENSG00000 | 6.09   | 30.64   | -2.158 | 4.21E-51  |
| PARD3B   | ENSG00000 | 0.74   | 6.37    | -2.083 | 4.45E-43  |
| PRRX1    | ENSG00000 | 3.74   | 40.43   | -3.128 | 5.22E-35  |
| MORN1    | ENSG00000 | 2.38   | 23.19   | -2.839 | 4.15E-77  |

|           |           |        |          |         |          |
|-----------|-----------|--------|----------|---------|----------|
| RALGPS2   | ENSG00000 | 6.59   | 45.339   | -2.61   | 2.45E-45 |
| KIAA1324  | ENSG00000 | 1.47   | 31.6     | -3.722  | 3.67E-53 |
| SWT1      | ENSG00000 | 3.12   | 22.32    | -2.501  | 4.14E-64 |
| TNNI3K    | ENSG00000 | 0.29   | 6.41     | -2.522  | 2.98E-74 |
| KIF21B    | ENSG00000 | 3.54   | 17.179   | -2.002  | 2.27E-23 |
| OSCP1     | ENSG00000 | 6.03   | 105.499  | -3.921  | 6.29E-71 |
| HPCAL4    | ENSG00000 | 0.09   | 5.13     | -2.492  | 2.47E-65 |
| SSX2IP    | ENSG00000 | 5.67   | 128.871  | -4.283  | 5.29E-72 |
| KIF17     | ENSG00000 | 5.19   | 48.529   | -3      | 3.02E-62 |
| TSPAN1    | ENSG00000 | 0.43   | 46.769   | -5.062  | 4.11E-42 |
| FAAH      | ENSG00000 | 10.78  | 88.707   | -2.929  | 1.56E-27 |
| NSUN4     | ENSG00000 | 12.47  | 124.611  | -3.221  | 8.88E-48 |
| F3        | ENSG00000 | 6.15   | 56.798   | -3.015  | 3.61E-40 |
| MTFR1L    | ENSG00000 | 24.729 | 115.511  | -2.179  | 2.59E-80 |
| PROX1     | ENSG00000 | 0.11   | 7.66     | -2.964  | 1.20E-47 |
| 2-Mar     | ENSG00000 | 1.9    | 17.94    | -2.707  | 4.11E-42 |
| STK11     | ENSG00000 | 35.68  | 158.012  | -2.116  | 1.92E-77 |
| TREH      | ENSG00000 | 0.04   | 3.47     | -2.104  | 1.35E-30 |
| ZNF541    | ENSG00000 | 0.36   | 27.441   | -4.386  | 1.19E-99 |
| TNP1      | ENSG00000 | 0.14   | 8134.285 | -12.801 | 7.53E-75 |
| SPACA1    | ENSG00000 | 0.06   | 58.27    | -5.805  | 3.22E-75 |
| SGIP1     | ENSG00000 | 0.48   | 9.89     | -2.879  | 8.96E-61 |
| ZC2HC1B   | ENSG00000 | 0.06   | 20.559   | -4.346  | 7.69E-59 |
| PMFBP1    | ENSG00000 | 1.03   | 26.259   | -3.747  | 1.74E-61 |
| SLC16A7   | ENSG00000 | 0.34   | 13.24    | -3.41   | 2.78E-59 |
| TTLL5     | ENSG00000 | 14.28  | 119.56   | -2.98   | 6.26E-54 |
| PPP4R4    | ENSG00000 | 0.67   | 11.55    | -2.91   | 6.47E-70 |
| ZC2HC1C   | ENSG00000 | 2.17   | 104.567  | -5.058  | 2.88E-69 |
| KCNIP2    | ENSG00000 | 0.91   | 7.33     | -2.125  | 1.80E-84 |
| EQTN      | ENSG00000 | 0.02   | 43.281   | -5.44   | 1.58E-71 |
| INSL6     | ENSG00000 | 0.08   | 20.629   | -4.324  | 7.39E-83 |
| MAGEB4    | ENSG00000 | 0      | 8.37     | -3.228  | 3.61E-87 |
| SLC25A2   | ENSG00000 | 0.04   | 8.29     | -3.159  | 8.60E-76 |
| TTLL2     | ENSG00000 | 0.08   | 25.259   | -4.604  | 5.54E-63 |
| SNX19     | ENSG00000 | 9.06   | 39.541   | -2.011  | 2.47E-45 |
| TEX11     | ENSG00000 | 1.46   | 13.4     | -2.549  | 4.75E-39 |
| KIAA1217  | ENSG00000 | 3.4    | 21.941   | -2.382  | 2.25E-34 |
| SEPT7P9   | ENSG00000 | 0.25   | 61.699   | -5.648  | 6.01E-71 |
| LYZL1     | ENSG00000 | 0      | 74.49    | -6.238  | 2.80E-71 |
| IQSEC3    | ENSG00000 | 0.93   | 8.22     | -2.256  | 9.55E-29 |
| SOHLH2    | ENSG00000 | 1.38   | 18.47    | -3.032  | 3.54E-44 |
| FAM53C    | ENSG00000 | 16.22  | 93.428   | -2.455  | 4.84E-65 |
| SIL1      | ENSG00000 | 21.22  | 108.668  | -2.303  | 2.10E-64 |
| SORBS3    | ENSG00000 | 92.212 | 377.805  | -2.023  | 1.81E-49 |
| RDH10     | ENSG00000 | 4.63   | 25.49    | -2.234  | 1.90E-32 |
| TEX14     | ENSG00000 | 0.83   | 44.73    | -4.643  | 2.48E-70 |
| PAPD5     | ENSG00000 | 5.72   | 27.17    | -2.068  | 9.73E-44 |
| RP11-408E | ENSG00000 | 0      | 15.94    | -4.082  | 1.14E-72 |
| RGSL1     | ENSG00000 | 0      | 18.939   | -4.318  | 1.79E-67 |

|           |           |        |          |         |           |
|-----------|-----------|--------|----------|---------|-----------|
| GJA8      | ENSG00000 | 0      | 6.18     | -2.844  | 3.87E-65  |
| MAPK8IP1  | ENSG00000 | 7.01   | 38.77    | -2.312  | 1.31E-51  |
| PILRB     | ENSG00000 | 17.859 | 164.505  | -3.134  | 8.44E-79  |
| HPCA      | ENSG00000 | 1.01   | 13.56    | -2.857  | 1.87E-50  |
| POLK      | ENSG00000 | 3.42   | 19.631   | -2.223  | 2.45E-67  |
| OBP2A     | ENSG00000 | 0.13   | 4.63     | -2.317  | 4.26E-25  |
| TBX22     | ENSG00000 | 0.09   | 28.23    | -4.745  | 1.74E-110 |
| PRM2      | ENSG00000 | 0.06   | 15349.46 | -13.822 | 2.20E-78  |
| LDB3      | ENSG00000 | 0.32   | 5.79     | -2.363  | 1.01E-57  |
| SPATA1    | ENSG00000 | 0.64   | 12.14    | -3.002  | 6.46E-91  |
| LRRC39    | ENSG00000 | 0.29   | 7.59     | -2.735  | 1.83E-58  |
| PQLC1     | ENSG00000 | 33.13  | 142.606  | -2.073  | 6.14E-45  |
| PHF24     | ENSG00000 | 2.19   | 22.161   | -2.86   | 2.79E-46  |
| IFT81     | ENSG00000 | 6.56   | 29.531   | -2.014  | 6.84E-45  |
| RASSF8    | ENSG00000 | 4.9    | 89.927   | -3.946  | 2.01E-34  |
| OPTN      | ENSG00000 | 25.801 | 109.987  | -2.05   | 7.20E-63  |
| IL13RA2   | ENSG00000 | 2.08   | 33.19    | -3.473  | 5.11E-38  |
| ESX1      | ENSG00000 | 0.34   | 11.85    | -3.261  | 2.01E-59  |
| TNFAIP6   | ENSG00000 | 1.34   | 16.12    | -2.871  | 9.78E-36  |
| LPGAT1    | ENSG00000 | 3.9    | 20.8     | -2.154  | 7.45E-31  |
| GOS2      | ENSG00000 | 6.37   | 36.45    | -2.345  | 7.78E-32  |
| INHA      | ENSG00000 | 1.06   | 122.301  | -5.903  | 5.69E-75  |
| OBSL1     | ENSG00000 | 28.67  | 423.347  | -3.838  | 1.82E-73  |
| FAM209A   | ENSG00000 | 0.23   | 136.749  | -6.807  | 1.58E-79  |
| SLPI      | ENSG00000 | 0.69   | 33.451   | -4.349  | 1.03E-29  |
| WFDC3     | ENSG00000 | 0.97   | 131.78   | -6.075  | 1.69E-57  |
| GTSF1L    | ENSG00000 | 0.2    | 278.879  | -7.866  | 9.77E-72  |
| RNF114    | ENSG00000 | 72.549 | 344.7    | -2.233  | 1.87E-42  |
| TP53TG5   | ENSG00000 | 0.15   | 21.35    | -4.281  | 5.55E-58  |
| IRGC      | ENSG00000 | 0.07   | 197.129  | -7.533  | 1.16E-76  |
| TCP11     | ENSG00000 | 0.31   | 526.795  | -8.654  | 2.36E-84  |
| OPN5      | ENSG00000 | 0      | 8.19     | -3.2    | 7.40E-71  |
| SSUH2     | ENSG00000 | 3.09   | 24.931   | -2.664  | 4.90E-26  |
| LRRC29    | ENSG00000 | 1.56   | 9.42     | -2.025  | 8.06E-73  |
| PIWIL1    | ENSG00000 | 1.4    | 59.358   | -4.652  | 1.91E-28  |
| GPR18     | ENSG00000 | 1      | 13.03    | -2.81   | 5.02E-33  |
| GRK4      | ENSG00000 | 1.46   | 81.673   | -5.071  | 3.70E-100 |
| SOX9      | ENSG00000 | 1.19   | 33.889   | -3.994  | 1.41E-43  |
| TEKT3     | ENSG00000 | 0.9    | 65.348   | -5.126  | 3.54E-75  |
| SLC25A35  | ENSG00000 | 7.41   | 41.911   | -2.351  | 6.56E-43  |
| OPRL1     | ENSG00000 | 1.36   | 8.81     | -2.055  | 1.10E-48  |
| LINC00029 | ENSG00000 | 0      | 7.04     | -3.007  | 4.04E-77  |
| SDCBP2    | ENSG00000 | 1.11   | 9.68     | -2.34   | 4.93E-53  |
| FAM182A   | ENSG00000 | 0.46   | 13.92    | -3.353  | 1.42E-42  |
| TMX4      | ENSG00000 | 12.26  | 66.638   | -2.351  | 3.67E-67  |
| PCSK2     | ENSG00000 | 0.02   | 6.12     | -2.803  | 7.24E-50  |
| SIRPD     | ENSG00000 | 0.21   | 75.598   | -5.984  | 8.29E-66  |
| ST3GAL3   | ENSG00000 | 6.07   | 78.978   | -3.5    | 8.12E-66  |
| TMEM53    | ENSG00000 | 9.27   | 44.099   | -2.135  | 1.18E-38  |

|          |           |        |          |        |          |
|----------|-----------|--------|----------|--------|----------|
| F10      | ENSG00000 | 1.49   | 13.81    | -2.572 | 1.53E-12 |
| TSKS     | ENSG00000 | 2.87   | 172.469  | -5.486 | 1.08E-62 |
| SSX1     | ENSG00000 | 0.05   | 8.49     | -3.176 | 4.67E-74 |
| HSPA2    | ENSG00000 | 6.41   | 158.023  | -4.424 | 4.44E-64 |
| PZP      | ENSG00000 | 0.08   | 4.39     | -2.319 | 1.33E-45 |
| PRDM7    | ENSG00000 | 0.14   | 4.68     | -2.317 | 7.90E-65 |
| WDR60    | ENSG00000 | 6.82   | 44.73    | -2.548 | 3.14E-65 |
| FAM78A   | ENSG00000 | 5.23   | 39.76    | -2.71  | 1.09E-50 |
| HRASLS   | ENSG00000 | 3.55   | 99.76    | -4.469 | 9.64E-68 |
| PLA2G5   | ENSG00000 | 2.17   | 20.24    | -2.744 | 2.61E-40 |
| FBXL16   | ENSG00000 | 2.73   | 19       | -2.423 | 6.56E-43 |
| TUBA4A   | ENSG00000 | 12.95  | 72.881   | -2.405 | 1.99E-30 |
| HIP1     | ENSG00000 | 6.19   | 57.939   | -3.035 | 8.59E-38 |
| SPINK2   | ENSG00000 | 4.7    | 510.794  | -6.488 | 2.82E-65 |
| POM121L9 | ENSG00000 | 0.3    | 70.908   | -5.79  | 3.26E-90 |
| IGLL1    | ENSG00000 | 0      | 29.13    | -4.913 | 3.02E-67 |
| RIBC2    | ENSG00000 | 1.36   | 41.489   | -4.17  | 3.03E-53 |
| KRT17    | ENSG00000 | 0.38   | 5.21     | -2.17  | 2.73E-04 |
| STRIP2   | ENSG00000 | 4.43   | 26.359   | -2.333 | 1.68E-20 |
| KLHDC10  | ENSG00000 | 2.62   | 37.25    | -3.401 | 9.86E-64 |
| FEZF1    | ENSG00000 | 0.06   | 5.49     | -2.614 | 1.33E-48 |
| PDE11A   | ENSG00000 | 0.06   | 4.08     | -2.261 | 4.97E-35 |
| TTBK2    | ENSG00000 | 2.71   | 24.299   | -2.77  | 5.48E-58 |
| USP6     | ENSG00000 | 1.96   | 19.04    | -2.759 | 3.45E-29 |
| SHBG     | ENSG00000 | 0.32   | 13.94    | -3.501 | 5.91E-54 |
| LRRC6    | ENSG00000 | 6.06   | 40.419   | -2.553 | 1.40E-23 |
| KLK10    | ENSG00000 | 0.93   | 8.81     | -2.346 | 7.19E-42 |
| RNASE1   | ENSG00000 | 75.771 | 1255.111 | -4.032 | 9.50E-54 |
| QRICH2   | ENSG00000 | 4.03   | 39.379   | -3.005 | 3.39E-50 |
| FOXJ1    | ENSG00000 | 0.2    | 22.21    | -4.274 | 1.84E-25 |
| VCY      | ENSG00000 | 0.69   | 129.489  | -6.271 | 2.01E-59 |
| SYT5     | ENSG00000 | 1.06   | 7.77     | -2.09  | 6.77E-39 |
| GAMT     | ENSG00000 | 14.88  | 73.791   | -2.236 | 9.95E-30 |
| TSPAN16  | ENSG00000 | 0.07   | 174.925  | -7.361 | 6.77E-74 |
| GDF1     | ENSG00000 | 0.5    | 6.5      | -2.322 | 1.67E-63 |
| KIF1A    | ENSG00000 | 1.83   | 22.11    | -3.03  | 1.98E-31 |
| SLC27A1  | ENSG00000 | 6.22   | 28.959   | -2.053 | 3.89E-59 |
| RSPH3    | ENSG00000 | 1.3    | 16.91    | -2.961 | 7.96E-62 |
| STK33    | ENSG00000 | 6.15   | 58.282   | -3.052 | 1.93E-57 |
| KIAA1683 | ENSG00000 | 1.04   | 45.781   | -4.519 | 4.93E-73 |
| SAG      | ENSG00000 | 0.08   | 10.06    | -3.356 | 3.92E-56 |
| TNNT3    | ENSG00000 | 0.87   | 7.67     | -2.213 | 2.61E-16 |
| PNPLA7   | ENSG00000 | 1.05   | 8.93     | -2.276 | 2.77E-55 |
| HBZ      | ENSG00000 | 0.06   | 8.79     | -3.207 | 1.29E-61 |
| GATA5    | ENSG00000 | 0.62   | 14.53    | -3.261 | 1.12E-40 |
| RBBP8NL  | ENSG00000 | 0.02   | 3.59     | -2.17  | 2.68E-35 |
| POMT1    | ENSG00000 | 16.829 | 116.791  | -2.724 | 1.65E-86 |
| PNCK     | ENSG00000 | 4.56   | 23.02    | -2.111 | 1.19E-30 |
| PKDREJ   | ENSG00000 | 0.06   | 3.38     | -2.047 | 3.55E-74 |

|           |           |        |         |        |           |
|-----------|-----------|--------|---------|--------|-----------|
| HSD17B3   | ENSG00000 | 0.44   | 44.919  | -4.995 | 3.50E-78  |
| HABP4     | ENSG00000 | 9.66   | 58.1    | -2.471 | 9.79E-55  |
| RGN       | ENSG00000 | 0.55   | 5.67    | -2.105 | 9.97E-12  |
| POLN      | ENSG00000 | 0.4    | 11.76   | -3.188 | 3.79E-114 |
| SYNE1     | ENSG00000 | 7.63   | 43.961  | -2.381 | 1.38E-50  |
| TTLL9     | ENSG00000 | 0.26   | 17.21   | -3.853 | 1.19E-75  |
| TEX101    | ENSG00000 | 0.07   | 184.004 | -7.434 | 7.41E-94  |
| RAB11FIP4 | ENSG00000 | 14.16  | 85.609  | -2.514 | 4.43E-21  |
| GALNT15   | ENSG00000 | 0.2    | 6.83    | -2.706 | 1.18E-79  |
| RHOXF2    | ENSG00000 | 0.21   | 33.77   | -4.845 | 5.98E-52  |
| KHDRBS3   | ENSG00000 | 20.11  | 195.265 | -3.217 | 2.05E-46  |
| ZSCAN5A   | ENSG00000 | 5.94   | 34.649  | -2.361 | 1.09E-59  |
| USP29     | ENSG00000 | 0.01   | 4.37    | -2.411 | 1.58E-75  |
| LRRC9     | ENSG00000 | 0.09   | 7.57    | -2.975 | 6.07E-54  |
| PODNL1    | ENSG00000 | 0.74   | 9.2     | -2.551 | 6.43E-39  |
| ZNF20     | ENSG00000 | 2.08   | 11.4    | -2.009 | 9.88E-48  |
| SPATA6    | ENSG00000 | 5.2    | 188.784 | -4.936 | 3.03E-62  |
| PRKAA1    | ENSG00000 | 9.59   | 48.839  | -2.235 | 5.53E-61  |
| SERPINF1  | ENSG00000 | 61.188 | 405.426 | -2.708 | 2.01E-29  |
| RGS22     | ENSG00000 | 0.42   | 86.521  | -5.946 | 4.03E-107 |
| MATN2     | ENSG00000 | 7.8    | 35.189  | -2.04  | 4.44E-16  |
| SCP2D1    | ENSG00000 | 0      | 70.599  | -6.162 | 5.38E-74  |
| SNAP25    | ENSG00000 | 0.5    | 6.64    | -2.349 | 1.45E-36  |
| HAPLN2    | ENSG00000 | 0.14   | 4.36    | -2.233 | 2.43E-99  |
| IGHMBP2   | ENSG00000 | 8.14   | 40.649  | -2.188 | 5.78E-80  |
| MTL5      | ENSG00000 | 6.08   | 65.1    | -3.223 | 4.25E-45  |
| VSTM2L    | ENSG00000 | 0.38   | 5.55    | -2.247 | 9.53E-21  |
| OSER1     | ENSG00000 | 29.421 | 150.601 | -2.317 | 1.61E-51  |
| PDE6A     | ENSG00000 | 0.03   | 3.59    | -2.156 | 2.75E-74  |
| TPTE2     | ENSG00000 | 0.62   | 10.75   | -2.859 | 1.56E-57  |
| RNF17     | ENSG00000 | 4.1    | 31.139  | -2.656 | 3.13E-21  |
| SPG20     | ENSG00000 | 8.29   | 39.609  | -2.128 | 2.85E-30  |
| FAM104A   | ENSG00000 | 19.1   | 193.635 | -3.275 | 1.92E-56  |
| MYH11     | ENSG00000 | 4.68   | 136.541 | -4.598 | 3.85E-34  |
| PDZD2     | ENSG00000 | 3.02   | 23.669  | -2.617 | 5.92E-72  |
| MYO18B    | ENSG00000 | 0.77   | 31.051  | -4.179 | 1.80E-53  |
| FAM83F    | ENSG00000 | 4.64   | 55.61   | -3.327 | 2.63E-49  |
| SEC14L4   | ENSG00000 | 0.33   | 6.1     | -2.416 | 8.00E-69  |
| ZDHHC8P1  | ENSG00000 | 1.53   | 10.05   | -2.127 | 1.70E-51  |
| LRRIQ1    | ENSG00000 | 0.35   | 15.09   | -3.575 | 1.24E-58  |
| MICALCL   | ENSG00000 | 0.23   | 19.77   | -4.078 | 3.82E-64  |
| MICAL2    | ENSG00000 | 4.13   | 65.199  | -3.69  | 2.09E-104 |
| TEX15     | ENSG00000 | 0.16   | 14.4    | -3.731 | 2.08E-81  |
| PEBP4     | ENSG00000 | 0.18   | 7.54    | -2.855 | 4.88E-65  |
| MRO       | ENSG00000 | 0.2    | 26.25   | -4.505 | 2.77E-94  |
| GSTM5     | ENSG00000 | 1.94   | 14.84   | -2.43  | 1.96E-24  |
| GSTM3     | ENSG00000 | 17.59  | 989.598 | -5.736 | 3.22E-86  |
| HMGCS2    | ENSG00000 | 0.1    | 41.08   | -5.258 | 2.40E-22  |
| SPIRE1    | ENSG00000 | 3.54   | 39.281  | -3.149 | 4.11E-72  |

|           |           |         |         |        |           |
|-----------|-----------|---------|---------|--------|-----------|
| LPIN1     | ENSG00000 | 13.98   | 115.032 | -2.953 | 1.00E-47  |
| SOX5      | ENSG00000 | 0.5     | 40.689  | -4.797 | 1.08E-65  |
| PRH2      | ENSG00000 | 0.06    | 3.83    | -2.188 | 4.62E-21  |
| PIWIL4    | ENSG00000 | 2.17    | 11.8    | -2.014 | 1.08E-48  |
| SPOCD1    | ENSG00000 | 0.96    | 17.3    | -3.223 | 1.08E-80  |
| PHC2      | ENSG00000 | 18.11   | 97.951  | -2.372 | 6.59E-35  |
| HOOK1     | ENSG00000 | 1.99    | 93.409  | -4.981 | 2.51E-55  |
| RNF138    | ENSG00000 | 28.41   | 188.47  | -2.688 | 1.46E-30  |
| TPGS2     | ENSG00000 | 36.931  | 226.976 | -2.587 | 2.60E-52  |
| TPP2      | ENSG00000 | 23.02   | 102.728 | -2.11  | 2.74E-55  |
| USP30     | ENSG00000 | 5.28    | 28.32   | -2.223 | 1.11E-55  |
| FAM71F1   | ENSG00000 | 2.37    | 144.547 | -5.433 | 9.12E-42  |
| SRPK2     | ENSG00000 | 27.2    | 132.348 | -2.241 | 1.73E-39  |
| PRPH      | ENSG00000 | 8.41    | 96.241  | -3.369 | 5.29E-36  |
| FAM186B   | ENSG00000 | 0.69    | 72.892  | -5.45  | 9.16E-74  |
| FAIM2     | ENSG00000 | 3.73    | 45.1    | -3.285 | 1.22E-36  |
| PAN2      | ENSG00000 | 27.331  | 127.053 | -2.176 | 1.15E-64  |
| MAP7      | ENSG00000 | 5.26    | 35.321  | -2.537 | 2.05E-46  |
| LACE1     | ENSG00000 | 3.62    | 27.729  | -2.637 | 8.19E-42  |
| SMPD2     | ENSG00000 | 7.38    | 74.048  | -3.163 | 1.09E-67  |
| RAB11FIP5 | ENSG00000 | 15.6    | 182.328 | -3.465 | 7.61E-50  |
| SLC9A5    | ENSG00000 | 1.05    | 9.95    | -2.417 | 4.41E-68  |
| GLUL      | ENSG00000 | 185.155 | 806.146 | -2.116 | 3.58E-44  |
| TSGA10    | ENSG00000 | 3.68    | 71.031  | -3.944 | 3.86E-70  |
| STAB2     | ENSG00000 | 0.2     | 4.29    | -2.14  | 7.24E-44  |
| USP44     | ENSG00000 | 0.59    | 14.78   | -3.311 | 1.12E-23  |
| LMO7      | ENSG00000 | 3.8     | 23.39   | -2.345 | 9.01E-31  |
| SPDYE1    | ENSG00000 | 0.31    | 9.01    | -2.934 | 7.73E-61  |
| MMD2      | ENSG00000 | 0.02    | 8.34    | -3.195 | 1.71E-70  |
| NKX2-8    | ENSG00000 | 0.11    | 10.14   | -3.327 | 9.98E-57  |
| ZFHX2     | ENSG00000 | 1.09    | 17.689  | -3.161 | 4.19E-56  |
| MYCBPAP   | ENSG00000 | 0.28    | 179.606 | -7.141 | 1.59E-103 |
| ODF2      | ENSG00000 | 30.5    | 425.111 | -3.758 | 1.16E-55  |
| RALGPS1   | ENSG00000 | 4.56    | 25.591  | -2.258 | 5.39E-54  |
| SLC2A8    | ENSG00000 | 14.56   | 103.902 | -2.753 | 8.25E-67  |
| GARNL3    | ENSG00000 | 1.33    | 9.41    | -2.16  | 3.46E-44  |
| WDR38     | ENSG00000 | 0.02    | 9.31    | -3.337 | 6.42E-52  |
| GABBR2    | ENSG00000 | 0.29    | 4.18    | -2.006 | 1.17E-39  |
| HEMGN     | ENSG00000 | 0.02    | 50.52   | -5.658 | 4.60E-66  |
| NR5A1     | ENSG00000 | 2.18    | 18.35   | -2.605 | 2.26E-58  |
| IL11RA    | ENSG00000 | 6.27    | 30.38   | -2.11  | 9.97E-19  |
| RNF38     | ENSG00000 | 15.6    | 112.813 | -2.777 | 4.96E-50  |
| SPAG8     | ENSG00000 | 0.38    | 51.46   | -5.248 | 3.47E-90  |
| TMEM8B    | ENSG00000 | 3.74    | 26.999  | -2.562 | 1.23E-52  |
| FOXP4     | ENSG00000 | 6.84    | 37.449  | -2.294 | 1.00E-12  |
| KLC4      | ENSG00000 | 11.11   | 50.171  | -2.079 | 2.03E-52  |
| SLC22A7   | ENSG00000 | 0.16    | 6.52    | -2.697 | 3.51E-49  |
| SLC22A23  | ENSG00000 | 1.99    | 15.1    | -2.429 | 3.53E-23  |
| LRRC1     | ENSG00000 | 2.1     | 18.939  | -2.685 | 5.71E-39  |

|          |           |        |         |        |           |
|----------|-----------|--------|---------|--------|-----------|
| FGFBP2   | ENSG00000 | 0.91   | 10.64   | -2.607 | 6.82E-26  |
| TTC29    | ENSG00000 | 0.05   | 79.798  | -6.266 | 2.55E-74  |
| MYO7A    | ENSG00000 | 2.41   | 43.849  | -3.717 | 2.68E-82  |
| MMP20    | ENSG00000 | 0      | 5.04    | -2.595 | 4.62E-50  |
| TRIM29   | ENSG00000 | 0.26   | 12.94   | -3.468 | 5.07E-39  |
| PPP2R1B  | ENSG00000 | 11.98  | 58.44   | -2.195 | 2.21E-42  |
| UNC13C   | ENSG00000 | 0.07   | 8.91    | -3.211 | 2.05E-43  |
| MAPKBP1  | ENSG00000 | 4.16   | 66.758  | -3.715 | 5.43E-91  |
| PARP6    | ENSG00000 | 35.849 | 156.356 | -2.094 | 5.34E-72  |
| LRRC49   | ENSG00000 | 3.81   | 19.03   | -2.058 | 2.53E-58  |
| ITPKA    | ENSG00000 | 1.7    | 16.46   | -2.693 | 5.26E-39  |
| PAK6     | ENSG00000 | 0.68   | 9.27    | -2.612 | 6.38E-63  |
| TTLL7    | ENSG00000 | 1.18   | 19.45   | -3.23  | 2.98E-83  |
| SLC44A5  | ENSG00000 | 0.18   | 4.79    | -2.295 | 2.72E-24  |
| TRIM54   | ENSG00000 | 0.72   | 48.982  | -4.861 | 9.28E-119 |
| LOXL4    | ENSG00000 | 0.47   | 6.96    | -2.437 | 2.96E-29  |
| STAMBPL1 | ENSG00000 | 2.71   | 18.63   | -2.404 | 5.43E-53  |
| STAT4    | ENSG00000 | 2.32   | 31.15   | -3.276 | 2.40E-47  |
| MDH1B    | ENSG00000 | 1.09   | 33.8    | -4.057 | 1.78E-70  |
| MNS1     | ENSG00000 | 1.55   | 52.269  | -4.385 | 9.71E-56  |
| FAM13A   | ENSG00000 | 3.7    | 21.48   | -2.258 | 7.79E-52  |
| MMRN1    | ENSG00000 | 0.4    | 4.75    | -2.038 | 1.37E-32  |
| PRDM5    | ENSG00000 | 0.49   | 6.05    | -2.242 | 1.86E-51  |
| LEF1     | ENSG00000 | 5.61   | 36.671  | -2.511 | 8.51E-31  |
| MTTP     | ENSG00000 | 0.2    | 5.43    | -2.422 | 3.72E-23  |
| MAPK8IP3 | ENSG00000 | 10.61  | 74.227  | -2.696 | 6.59E-61  |
| TTLL8    | ENSG00000 | 0      | 9.27    | -3.36  | 5.03E-65  |
| PLCZ1    | ENSG00000 | 0.04   | 82.773  | -6.332 | 2.38E-69  |
| PPFIA2   | ENSG00000 | 0.26   | 11.76   | -3.34  | 6.62E-78  |
| TMEM132F | ENSG00000 | 0.56   | 7.15    | -2.385 | 2.07E-50  |
| FAM222A  | ENSG00000 | 4.45   | 31.31   | -2.568 | 3.04E-55  |
| FOXN4    | ENSG00000 | 0.27   | 14.41   | -3.601 | 2.46E-72  |
| SMIM2    | ENSG00000 | 0.05   | 27.599  | -4.768 | 7.90E-62  |
| MORN3    | ENSG00000 | 0.85   | 94.313  | -5.687 | 5.85E-61  |
| SLAIN1   | ENSG00000 | 3.96   | 29.709  | -2.63  | 1.88E-70  |
| RNF113B  | ENSG00000 | 0.13   | 59.01   | -5.731 | 2.56E-81  |
| TTC6     | ENSG00000 | 0.2    | 8.76    | -3.024 | 9.59E-48  |
| REM2     | ENSG00000 | 0.52   | 5.89    | -2.18  | 2.27E-51  |
| TSSK4    | ENSG00000 | 0.71   | 57.531  | -5.097 | 9.79E-77  |
| ESR2     | ENSG00000 | 0.56   | 6.78    | -2.318 | 2.17E-104 |
| FAM181A  | ENSG00000 | 0      | 42.051  | -5.428 | 3.10E-73  |
| GCNT3    | ENSG00000 | 0.33   | 4.9     | -2.149 | 9.99E-37  |
| MAN2C1   | ENSG00000 | 41.961 | 213.796 | -2.322 | 3.90E-77  |
| GOLGA6D  | ENSG00000 | 0.13   | 14.13   | -3.743 | 3.51E-55  |
| PCSK6    | ENSG00000 | 2.74   | 16.03   | -2.187 | 1.74E-44  |
| WDR93    | ENSG00000 | 0.31   | 13.65   | -3.483 | 2.38E-66  |
| SH3GL3   | ENSG00000 | 2.34   | 119.353 | -5.171 | 8.59E-57  |
| 12-Sep   | ENSG00000 | 0.39   | 212.187 | -7.261 | 6.15E-76  |
| SLC5A2   | ENSG00000 | 0.28   | 27.441  | -4.474 | 1.39E-66  |

|          |           |        |         |        |          |
|----------|-----------|--------|---------|--------|----------|
| MYLK3    | ENSG00000 | 0.21   | 6.99    | -2.723 | 1.08E-74 |
| KIFC3    | ENSG00000 | 12.55  | 104.343 | -2.959 | 9.39E-62 |
| ZCCHC14  | ENSG00000 | 5.96   | 48.05   | -2.817 | 2.49E-70 |
| OSGIN1   | ENSG00000 | 1.24   | 20.89   | -3.289 | 1.66E-81 |
| RPL3L    | ENSG00000 | 0.59   | 10.99   | -2.915 | 3.47E-60 |
| GALNS    | ENSG00000 | 8.42   | 51.549  | -2.48  | 1.51E-81 |
| GAS8     | ENSG00000 | 7.7    | 38.641  | -2.188 | 1.87E-71 |
| GID4     | ENSG00000 | 8.18   | 81.109  | -3.161 | 3.73E-54 |
| KIF2B    | ENSG00000 | 0      | 89.89   | -6.506 | 1.05E-71 |
| SPATA22  | ENSG00000 | 7.4    | 169.248 | -4.341 | 8.54E-49 |
| SKAP1    | ENSG00000 | 4.71   | 27.509  | -2.32  | 8.50E-31 |
| LRRC46   | ENSG00000 | 0.84   | 83.221  | -5.516 | 2.10E-74 |
| SSH2     | ENSG00000 | 6.64   | 38.88   | -2.384 | 2.87E-59 |
| SPACA3   | ENSG00000 | 0.06   | 164.871 | -7.29  | 4.89E-76 |
| SLC25A52 | ENSG00000 | 0.16   | 7.68    | -2.904 | 7.72E-53 |
| GATA6    | ENSG00000 | 1.08   | 8.25    | -2.153 | 1.65E-12 |
| GREB1L   | ENSG00000 | 0.21   | 5.56    | -2.439 | 2.18E-55 |
| ZMYND15  | ENSG00000 | 1.31   | 43.901  | -4.281 | 2.48E-59 |
| RNF157   | ENSG00000 | 4.21   | 45.05   | -3.144 | 2.47E-54 |
| MBD1     | ENSG00000 | 20.71  | 132.357 | -2.619 | 5.72E-89 |
| ZCCHC2   | ENSG00000 | 4.42   | 25.61   | -2.296 | 5.67E-66 |
| FBXO15   | ENSG00000 | 1.03   | 34.63   | -4.134 | 4.75E-81 |
| TMEM91   | ENSG00000 | 6.61   | 48.86   | -2.712 | 1.19E-61 |
| SIRT3    | ENSG00000 | 8.93   | 54.681  | -2.487 | 4.86E-76 |
| EVI5L    | ENSG00000 | 5.06   | 49.841  | -3.069 | 1.35E-76 |
| ZNF473   | ENSG00000 | 6.37   | 39.14   | -2.445 | 3.95E-47 |
| FAM71E1  | ENSG00000 | 6.76   | 179.158 | -4.537 | 1.62E-51 |
| SLC2A5   | ENSG00000 | 2.93   | 55.372  | -3.842 | 2.54E-61 |
| MMEL1    | ENSG00000 | 1.12   | 36.88   | -4.159 | 7.27E-47 |
| FHAD1    | ENSG00000 | 0.7    | 38.609  | -4.542 | 1.54E-64 |
| MYOM3    | ENSG00000 | 0.73   | 11.64   | -2.869 | 1.79E-67 |
| SYPL2    | ENSG00000 | 0.62   | 12.18   | -3.024 | 3.90E-78 |
| PROK1    | ENSG00000 | 0.29   | 68.029  | -5.742 | 2.35E-61 |
| MPC2     | ENSG00000 | 48.691 | 303.32  | -2.615 | 2.17E-56 |
| MAEL     | ENSG00000 | 3.23   | 164.369 | -5.289 | 6.49E-53 |
| ILDR2    | ENSG00000 | 0.33   | 9.21    | -2.941 | 9.31E-78 |
| ISG20L2  | ENSG00000 | 30.969 | 208.918 | -2.715 | 2.63E-41 |
| FAM163A  | ENSG00000 | 0.06   | 15.47   | -3.958 | 2.15E-60 |
| RORC     | ENSG00000 | 0.74   | 15.02   | -3.203 | 5.15E-69 |
| FAM63A   | ENSG00000 | 2.77   | 30.6    | -3.067 | 3.80E-75 |
| SEMA6C   | ENSG00000 | 11.8   | 73.5    | -2.541 | 3.52E-60 |
| OAZ3     | ENSG00000 | 7.05   | 424.581 | -5.724 | 2.05E-53 |
| HORMAD1  | ENSG00000 | 7.79   | 70.039  | -3.015 | 6.94E-31 |
| GABPB2   | ENSG00000 | 2.37   | 18.5    | -2.533 | 5.34E-83 |
| HHIPL2   | ENSG00000 | 0.66   | 13.93   | -3.169 | 3.43E-57 |
| NUP210L  | ENSG00000 | 0.03   | 21.95   | -4.478 | 1.97E-87 |
| SCCPDH   | ENSG00000 | 11.02  | 131.652 | -3.464 | 3.72E-61 |
| MLK4     | ENSG00000 | 0.78   | 8.68    | -2.443 | 2.34E-45 |
| ETNK2    | ENSG00000 | 19.79  | 177.995 | -3.106 | 3.37E-75 |



|           |           |       |         |        |           |
|-----------|-----------|-------|---------|--------|-----------|
| PPFIA4    | ENSG00000 | 1.46  | 8.87    | -2.004 | 1.05E-52  |
| PLEKHA6   | ENSG00000 | 0.63  | 7.4     | -2.366 | 7.83E-13  |
| OSR1      | ENSG00000 | 0.66  | 7.84    | -2.413 | 1.15E-09  |
| REG3G     | ENSG00000 | 0.07  | 47.629  | -5.506 | 7.26E-53  |
| ST6GAL2   | ENSG00000 | 0.09  | 4.27    | -2.273 | 5.17E-27  |
| NPHP1     | ENSG00000 | 4.56  | 34.071  | -2.657 | 6.16E-60  |
| NT5DC4    | ENSG00000 | 0.27  | 18.699  | -3.955 | 7.60E-33  |
| RABL2A    | ENSG00000 | 4.7   | 39.36   | -2.824 | 1.40E-65  |
| FAHD2B    | ENSG00000 | 14.5  | 83.528  | -2.447 | 2.11E-66  |
| LYG1      | ENSG00000 | 0.65  | 7.14    | -2.303 | 7.19E-71  |
| KIAA1715  | ENSG00000 | 5.58  | 32.139  | -2.332 | 5.11E-38  |
| ZNF385B   | ENSG00000 | 0.54  | 14.17   | -3.3   | 1.37E-86  |
| PHOSPHO2  | ENSG00000 | 2.97  | 19.55   | -2.372 | 7.06E-56  |
| GULP1     | ENSG00000 | 1.22  | 13.65   | -2.722 | 9.35E-23  |
| UNC80     | ENSG00000 | 0.13  | 5.85    | -2.6   | 1.62E-95  |
| SPAG16    | ENSG00000 | 7.24  | 45.959  | -2.511 | 1.24E-57  |
| HES6      | ENSG00000 | 4.58  | 30.181  | -2.482 | 1.60E-35  |
| STK11IP   | ENSG00000 | 18.96 | 115.768 | -2.548 | 3.63E-79  |
| OSBPL10   | ENSG00000 | 3.98  | 73.439  | -3.902 | 7.14E-46  |
| SLC22A14  | ENSG00000 | 0.04  | 15.08   | -3.951 | 4.09E-71  |
| IGSF11    | ENSG00000 | 0.5   | 44.929  | -4.936 | 2.65E-98  |
| TMEM108   | ENSG00000 | 3.87  | 18.67   | -2.014 | 6.00E-29  |
| SPATA16   | ENSG00000 | 0.06  | 44.059  | -5.41  | 1.59E-68  |
| LPP       | ENSG00000 | 2.59  | 96.609  | -4.765 | 1.41E-69  |
| NICN1     | ENSG00000 | 5.38  | 24.58   | -2.003 | 5.02E-63  |
| VPRBP     | ENSG00000 | 13.53 | 69.642  | -2.281 | 1.06E-46  |
| LYAR      | ENSG00000 | 19.24 | 105.799 | -2.4   | 7.15E-33  |
| SLC10A6   | ENSG00000 | 0.04  | 5.34    | -2.608 | 1.26E-52  |
| SCD5      | ENSG00000 | 1.38  | 28.281  | -3.621 | 4.04E-49  |
| ROPN1L    | ENSG00000 | 0.8   | 463.587 | -8.012 | 6.03E-79  |
| UGT3A1    | ENSG00000 | 0.21  | 10.61   | -3.262 | 1.01E-38  |
| PLK2      | ENSG00000 | 7.97  | 41.231  | -2.235 | 2.80E-24  |
| IQGAP2    | ENSG00000 | 9.62  | 59.399  | -2.508 | 2.50E-29  |
| SPATA9    | ENSG00000 | 0.25  | 36.661  | -4.913 | 2.58E-69  |
| TSLP      | ENSG00000 | 0.1   | 5.58    | -2.581 | 2.86E-34  |
| LECT2     | ENSG00000 | 0.06  | 11.74   | -3.587 | 1.77E-57  |
| TIMD4     | ENSG00000 | 0.59  | 184.221 | -6.864 | 1.20E-70  |
| RMND5B    | ENSG00000 | 19.71 | 121.532 | -2.565 | 6.07E-51  |
| FAM50B    | ENSG00000 | 2.13  | 18.28   | -2.623 | 1.62E-75  |
| FAM217A   | ENSG00000 | 0.04  | 26.5    | -4.725 | 2.00E-83  |
| KLHL3     | ENSG00000 | 2.12  | 13.13   | -2.179 | 1.57E-78  |
| HIST1H2B/ | ENSG00000 | 0.08  | 6.67    | -2.828 | 1.14E-49  |
| RASGEF1C  | ENSG00000 | 0.18  | 9.11    | -3.099 | 7.69E-79  |
| TCTE1     | ENSG00000 | 0.51  | 40.221  | -4.771 | 1.87E-71  |
| RNF217    | ENSG00000 | 0.94  | 13.25   | -2.877 | 4.56E-71  |
| PNLDC1    | ENSG00000 | 1.59  | 14.8    | -2.609 | 1.15E-21  |
| SDK1      | ENSG00000 | 1.09  | 15.23   | -2.957 | 8.96E-40  |
| TRIM50    | ENSG00000 | 0.21  | 12.8    | -3.512 | 3.26E-104 |
| RAB41     | ENSG00000 | 0.17  | 5.03    | -2.366 | 9.65E-70  |

|          |           |        |         |        |           |
|----------|-----------|--------|---------|--------|-----------|
| ZNF711   | ENSG00000 | 2.02   | 35.859  | -3.609 | 3.39E-55  |
| NXF3     | ENSG00000 | 0.46   | 239.187 | -7.362 | 5.54E-99  |
| FBXO25   | ENSG00000 | 10.36  | 112.469 | -3.32  | 4.46E-68  |
| FATE1    | ENSG00000 | 0.73   | 310.316 | -7.491 | 5.08E-81  |
| MAGEA4   | ENSG00000 | 0.72   | 29.219  | -4.135 | 1.28E-21  |
| SLC25A37 | ENSG00000 | 13.13  | 56.539  | -2.026 | 6.60E-52  |
| STAR     | ENSG00000 | 1.94   | 60.199  | -4.38  | 3.95E-53  |
| SNTG1    | ENSG00000 | 0      | 5.98    | -2.803 | 7.35E-38  |
| PXDNL    | ENSG00000 | 0.93   | 6.81    | -2.017 | 4.60E-13  |
| TRIM55   | ENSG00000 | 0.15   | 18.67   | -4.096 | 4.91E-100 |
| FAM135B  | ENSG00000 | 0.21   | 20.45   | -4.148 | 5.33E-60  |
| ZNF462   | ENSG00000 | 3.18   | 16.16   | -2.037 | 4.22E-36  |
| WDR31    | ENSG00000 | 0.62   | 5.55    | -2.015 | 6.36E-61  |
| PTGES    | ENSG00000 | 3.31   | 21.681  | -2.396 | 2.71E-27  |
| HMCN2    | ENSG00000 | 0.75   | 11.24   | -2.806 | 1.74E-65  |
| ZEB1     | ENSG00000 | 2.92   | 17.73   | -2.256 | 5.16E-34  |
| FAM13C   | ENSG00000 | 0.73   | 8.71    | -2.489 | 1.56E-52  |
| LRIT1    | ENSG00000 | 0.01   | 7.89    | -3.138 | 2.24E-61  |
| RGR      | ENSG00000 | 0      | 4.22    | -2.384 | 1.08E-46  |
| HTR7     | ENSG00000 | 0.27   | 7.31    | -2.71  | 2.62E-63  |
| LRRC27   | ENSG00000 | 4.24   | 123.596 | -4.572 | 1.66E-84  |
| NKX6-2   | ENSG00000 | 0.1    | 3.63    | -2.074 | 1.86E-16  |
| PAOX     | ENSG00000 | 4.21   | 95.457  | -4.211 | 5.78E-62  |
| SESN3    | ENSG00000 | 2.54   | 63.201  | -4.181 | 1.70E-57  |
| TTC12    | ENSG00000 | 4.64   | 58.48   | -3.399 | 6.59E-75  |
| NCAM1    | ENSG00000 | 1.28   | 9.65    | -2.224 | 4.08E-18  |
| GLB1L2   | ENSG00000 | 1.76   | 11.68   | -2.2   | 3.53E-49  |
| GGTLC1   | ENSG00000 | 0      | 21.84   | -4.514 | 3.95E-62  |
| TKFC     | ENSG00000 | 24.669 | 112.938 | -2.15  | 1.16E-64  |
| ROM1     | ENSG00000 | 1.18   | 7.98    | -2.042 | 2.66E-53  |
| ZP1      | ENSG00000 | 0.02   | 9.21    | -3.323 | 2.62E-57  |
| OOSP2    | ENSG00000 | 0      | 19.2    | -4.336 | 6.60E-94  |
| FEZ1     | ENSG00000 | 3.32   | 36.539  | -3.119 | 5.16E-55  |
| SPATA25  | ENSG00000 | 0.63   | 30.33   | -4.265 | 2.95E-79  |
| FAM57B   | ENSG00000 | 0.23   | 154.214 | -6.979 | 2.22E-73  |
| HIRIP3   | ENSG00000 | 12.28  | 57.472  | -2.138 | 3.58E-54  |
| MPP7     | ENSG00000 | 0.68   | 9.41    | -2.631 | 1.77E-50  |
| CCDC7    | ENSG00000 | 0.08   | 41.9    | -5.312 | 1.92E-82  |
| FRMPD2B  | ENSG00000 | 0.01   | 5.53    | -2.693 | 3.64E-54  |
| LATS2    | ENSG00000 | 3.43   | 19.5    | -2.21  | 3.09E-52  |
| KIAA1328 | ENSG00000 | 1.99   | 18.539  | -2.708 | 6.74E-93  |
| LYPD6B   | ENSG00000 | 2.55   | 48.87   | -3.812 | 5.03E-38  |
| SPATA4   | ENSG00000 | 0.09   | 120.4   | -6.799 | 1.35E-81  |
| FSIP1    | ENSG00000 | 0.28   | 6.06    | -2.464 | 1.61E-65  |
| PPP1R1C  | ENSG00000 | 3.74   | 52.749  | -3.503 | 1.92E-49  |
| PIH1D2   | ENSG00000 | 0.69   | 69.271  | -5.378 | 2.73E-78  |
| TEX12    | ENSG00000 | 0.17   | 12.71   | -3.551 | 1.82E-87  |
| TKTL2    | ENSG00000 | 0.07   | 34.91   | -5.069 | 3.66E-80  |
| LYZL2    | ENSG00000 | 0      | 90.628  | -6.518 | 5.95E-73  |

|           |           |       |         |        |          |
|-----------|-----------|-------|---------|--------|----------|
| RAD9B     | ENSG00000 | 0.38  | 16.27   | -3.645 | 1.49E-89 |
| MAT1A     | ENSG00000 | 0.26  | 9.89    | -3.111 | 2.65E-98 |
| MAGI1     | ENSG00000 | 4.02  | 21.07   | -2.136 | 1.56E-31 |
| TEX30     | ENSG00000 | 11.22 | 136.276 | -3.49  | 5.79E-72 |
| ME3       | ENSG00000 | 1.31  | 20.53   | -3.22  | 1.50E-59 |
| FER       | ENSG00000 | 4.33  | 22.32   | -2.129 | 1.35E-48 |
| SLC25A31  | ENSG00000 | 0.09  | 33.529  | -4.985 | 1.66E-82 |
| TEX9      | ENSG00000 | 2.18  | 14.37   | -2.273 | 7.82E-61 |
| NR3C2     | ENSG00000 | 0.41  | 11.82   | -3.185 | 3.79E-71 |
| INPP1     | ENSG00000 | 3.87  | 78.129  | -4.022 | 1.57E-78 |
| SLC25A4   | ENSG00000 | 7.84  | 39.579  | -2.199 | 8.58E-46 |
| SERP2     | ENSG00000 | 2.06  | 62.37   | -4.372 | 4.25E-95 |
| ZNF385D   | ENSG00000 | 0.67  | 35.429  | -4.447 | 1.78E-71 |
| PABPC3    | ENSG00000 | 0.23  | 28.479  | -4.583 | 2.49E-73 |
| GLT1D1    | ENSG00000 | 1.83  | 21.421  | -2.986 | 6.48E-29 |
| RBM46     | ENSG00000 | 1.66  | 10.63   | -2.128 | 3.39E-27 |
| TUBA3E    | ENSG00000 | 0.38  | 208.846 | -7.249 | 2.31E-33 |
| TMEM163   | ENSG00000 | 0.93  | 9.96    | -2.506 | 7.58E-51 |
| HSPB8     | ENSG00000 | 2.53  | 14.19   | -2.105 | 1.67E-15 |
| GRID2     | ENSG00000 | 0.19  | 38.991  | -5.071 | 1.13E-71 |
| SH2D6     | ENSG00000 | 0.72  | 22.07   | -3.746 | 8.22E-54 |
| SPOCK1    | ENSG00000 | 1.8   | 18.43   | -2.795 | 2.64E-38 |
| SUV39H2   | ENSG00000 | 8.1   | 46.429  | -2.382 | 2.59E-39 |
| OLAH      | ENSG00000 | 1.76  | 31.84   | -3.573 | 3.11E-30 |
| ZSCAN1    | ENSG00000 | 1.2   | 11.2    | -2.471 | 6.00E-49 |
| TRIM36    | ENSG00000 | 2.78  | 212.85  | -5.822 | 3.80E-61 |
| PLEKHH2   | ENSG00000 | 0.92  | 6.99    | -2.057 | 3.42E-31 |
| IGSF10    | ENSG00000 | 0.47  | 10.4    | -2.955 | 2.09E-39 |
| SPEF2     | ENSG00000 | 1.26  | 11.68   | -2.488 | 8.28E-64 |
| NADK2     | ENSG00000 | 5.12  | 43.761  | -2.871 | 9.68E-65 |
| SAR1B     | ENSG00000 | 11.9  | 59.858  | -2.238 | 8.00E-56 |
| WDR78     | ENSG00000 | 0.86  | 27.31   | -3.928 | 1.97E-76 |
| UTRN      | ENSG00000 | 11.7  | 66.389  | -2.408 | 2.76E-31 |
| LMNTD1    | ENSG00000 | 0.09  | 8.06    | -3.055 | 3.80E-27 |
| STK32B    | ENSG00000 | 1.33  | 12.35   | -2.518 | 4.69E-36 |
| TEKT5     | ENSG00000 | 0.27  | 43.51   | -5.131 | 3.44E-68 |
| RGPD3     | ENSG00000 | 0.13  | 8.29    | -3.039 | 2.30E-77 |
| NR4A2     | ENSG00000 | 0.76  | 7.26    | -2.231 | 1.15E-48 |
| SCN3A     | ENSG00000 | 0.09  | 4.54    | -2.346 | 1.44E-55 |
| SLC25A27  | ENSG00000 | 2.55  | 43.721  | -3.655 | 7.94E-80 |
| FRMD1     | ENSG00000 | 0.1   | 10.17   | -3.344 | 7.40E-87 |
| FAM81B    | ENSG00000 | 0.07  | 118.528 | -6.804 | 1.77E-66 |
| LINC00467 | ENSG00000 | 17.05 | 364.127 | -4.338 | 4.66E-37 |
| INO80C    | ENSG00000 | 19.91 | 111.26  | -2.425 | 3.92E-57 |
| TEX29     | ENSG00000 | 0.11  | 63.711  | -5.865 | 4.93E-77 |
| SPACA7    | ENSG00000 | 0     | 109.972 | -6.794 | 3.79E-76 |
| FBXL2     | ENSG00000 | 1.67  | 22.49   | -3.137 | 1.32E-58 |
| GOLGA8F   | ENSG00000 | 0     | 27.179  | -4.817 | 2.05E-74 |
| TGIF2LX   | ENSG00000 | 0.14  | 10.76   | -3.367 | 2.31E-41 |

|          |           |        |         |        |           |
|----------|-----------|--------|---------|--------|-----------|
| ZNF599   | ENSG00000 | 3.46   | 19.48   | -2.199 | 1.52E-75  |
| SEMA3D   | ENSG00000 | 0.37   | 5.02    | -2.136 | 1.79E-29  |
| FAM134B  | ENSG00000 | 1.08   | 76.399  | -5.218 | 8.85E-69  |
| TNIK     | ENSG00000 | 1.6    | 20.269  | -3.032 | 1.29E-41  |
| FAM167A  | ENSG00000 | 0.5    | 5.16    | -2.038 | 1.10E-33  |
| FAM27C   | ENSG00000 | 0.74   | 54.149  | -4.986 | 2.57E-71  |
| SRSF12   | ENSG00000 | 3.01   | 20.99   | -2.455 | 2.90E-42  |
| PSMA8    | ENSG00000 | 0.13   | 18.84   | -4.134 | 1.90E-92  |
| NCAM2    | ENSG00000 | 0.5    | 6.93    | -2.402 | 4.65E-61  |
| L3MBTL4  | ENSG00000 | 0.51   | 14.34   | -3.345 | 1.65E-135 |
| PDE1C    | ENSG00000 | 0.42   | 7.73    | -2.62  | 9.03E-50  |
| JAM2     | ENSG00000 | 3.94   | 34.951  | -2.863 | 2.93E-52  |
| EPHB1    | ENSG00000 | 0.77   | 7.48    | -2.26  | 8.18E-41  |
| 14-Sep   | ENSG00000 | 0.27   | 14.54   | -3.613 | 4.74E-71  |
| RSPH10B  | ENSG00000 | 1.87   | 25.95   | -3.231 | 4.29E-35  |
| ODF1     | ENSG00000 | 0      | 507.828 | -8.991 | 3.90E-79  |
| SLC25A28 | ENSG00000 | 29.28  | 138.976 | -2.209 | 9.36E-83  |
| USP25    | ENSG00000 | 9.7    | 47.679  | -2.186 | 1.65E-52  |
| PPM1J    | ENSG00000 | 2.86   | 92.808  | -4.603 | 6.89E-62  |
| TRIM74   | ENSG00000 | 0.13   | 7.66    | -2.938 | 1.45E-106 |
| MAGEC1   | ENSG00000 | 0.91   | 9.31    | -2.432 | 1.06E-28  |
| LRGUK    | ENSG00000 | 0.32   | 5.37    | -2.271 | 9.81E-73  |
| SETD9    | ENSG00000 | 6.66   | 48.468  | -2.691 | 6.19E-46  |
| PDZD9    | ENSG00000 | 0.06   | 19.09   | -4.244 | 5.66E-67  |
| OTOA     | ENSG00000 | 0.86   | 8.66    | -2.377 | 5.10E-36  |
| SPAG17   | ENSG00000 | 0.61   | 65.981  | -5.379 | 2.99E-74  |
| SAXO1    | ENSG00000 | 0.03   | 48.321  | -5.581 | 7.65E-70  |
| TRIM42   | ENSG00000 | 0      | 20      | -4.392 | 2.32E-57  |
| PXYLP1   | ENSG00000 | 4.11   | 47.441  | -3.245 | 5.87E-46  |
| PSD3     | ENSG00000 | 2.6    | 65.839  | -4.215 | 6.70E-63  |
| FAM161B  | ENSG00000 | 2.42   | 21.45   | -2.715 | 1.67E-40  |
| GPR61    | ENSG00000 | 0.4    | 4.66    | -2.015 | 7.44E-77  |
| TDRD9    | ENSG00000 | 2.26   | 57.09   | -4.155 | 1.08E-64  |
| SH3RF2   | ENSG00000 | 0.67   | 526.065 | -8.302 | 2.13E-84  |
| PPP2R2B  | ENSG00000 | 1.2    | 24.75   | -3.549 | 1.41E-39  |
| FBXO43   | ENSG00000 | 1.1    | 7.91    | -2.085 | 1.71E-43  |
| TYSND1   | ENSG00000 | 8.32   | 43.239  | -2.247 | 1.38E-51  |
| ZFAND3   | ENSG00000 | 39.73  | 219.214 | -2.435 | 7.74E-45  |
| MAPK13   | ENSG00000 | 6.42   | 51.789  | -2.831 | 3.13E-59  |
| FBRS     | ENSG00000 | 20.72  | 208.166 | -3.268 | 2.91E-88  |
| PHKG2    | ENSG00000 | 34.551 | 242.106 | -2.774 | 3.20E-57  |
| VPS8     | ENSG00000 | 10.75  | 47.31   | -2.04  | 6.71E-64  |
| PDE6D    | ENSG00000 | 14.73  | 74.048  | -2.254 | 7.49E-57  |
| FAM92A1P | ENSG00000 | 0.94   | 8.37    | -2.272 | 7.59E-46  |
| SHCBP1L  | ENSG00000 | 0.19   | 141.317 | -6.902 | 9.46E-90  |
| NMNAT2   | ENSG00000 | 1.26   | 25.3    | -3.541 | 2.37E-73  |
| LYZL4    | ENSG00000 | 0      | 68.74   | -6.124 | 7.02E-73  |
| SLC6A1   | ENSG00000 | 0.24   | 6.23    | -2.544 | 6.17E-65  |
| LRP8     | ENSG00000 | 3.5    | 30.519  | -2.808 | 6.52E-65  |

|          |           |        |         |        |          |
|----------|-----------|--------|---------|--------|----------|
| SUSD3    | ENSG00000 | 20     | 102.508 | -2.301 | 9.83E-28 |
| HYDIN    | ENSG00000 | 1.14   | 15.63   | -2.958 | 2.87E-71 |
| ZNF19    | ENSG00000 | 1.7    | 17.82   | -2.801 | 5.70E-85 |
| MUM1L1   | ENSG00000 | 0.24   | 19.68   | -4.06  | 1.66E-97 |
| LCA5L    | ENSG00000 | 1.99   | 105.032 | -5.148 | 8.18E-69 |
| MEGF11   | ENSG00000 | 0.5    | 16.3    | -3.528 | 8.30E-53 |
| RADIL    | ENSG00000 | 3.41   | 22.161  | -2.393 | 6.15E-46 |
| UBXN11   | ENSG00000 | 15     | 84.617  | -2.42  | 4.02E-59 |
| HPD      | ENSG00000 | 2.7    | 15.98   | -2.198 | 6.05E-23 |
| LRRC43   | ENSG00000 | 0.89   | 12.05   | -2.788 | 1.62E-63 |
| SLC13A3  | ENSG00000 | 0.81   | 6.87    | -2.12  | 9.93E-44 |
| RHBDL2   | ENSG00000 | 0.2    | 9       | -3.059 | 5.75E-80 |
| RIBC1    | ENSG00000 | 2.95   | 49.148  | -3.666 | 8.84E-52 |
| POM121L2 | ENSG00000 | 0.04   | 6.44    | -2.839 | 2.95E-68 |
| GDPD5    | ENSG00000 | 11.84  | 62.969  | -2.317 | 1.76E-44 |
| PAGE5    | ENSG00000 | 0.45   | 32.78   | -4.542 | 7.30E-25 |
| VWA5B1   | ENSG00000 | 0.02   | 11.09   | -3.567 | 2.58E-58 |
| RAPGEF6  | ENSG00000 | 2.97   | 15.78   | -2.08  | 7.13E-67 |
| FBXW5    | ENSG00000 | 47.96  | 433.893 | -3.151 | 1.03E-78 |
| KCNE2    | ENSG00000 | 0.31   | 4.99    | -2.193 | 1.26E-54 |
| GOLGA6A  | ENSG00000 | 0.35   | 35.49   | -4.756 | 6.81E-58 |
| SCUBE1   | ENSG00000 | 0.5    | 9.14    | -2.757 | 5.84E-59 |
| STARD9   | ENSG00000 | 2.9    | 31.721  | -3.069 | 5.33E-80 |
| TGM7     | ENSG00000 | 0.12   | 8.09    | -3.021 | 3.32E-42 |
| RGL4     | ENSG00000 | 1.28   | 10.99   | -2.395 | 6.56E-33 |
| SPRR2G   | ENSG00000 | 0      | 3.23    | -2.081 | 6.00E-37 |
| TEPP     | ENSG00000 | 0.27   | 25.12   | -4.362 | 6.64E-67 |
| LRRC36   | ENSG00000 | 0.82   | 81.12   | -5.496 | 3.21E-84 |
| TPPP3    | ENSG00000 | 3.96   | 20.141  | -2.092 | 3.79E-13 |
| ZDHHHC1  | ENSG00000 | 3.51   | 33.941  | -2.954 | 1.45E-67 |
| ZFYVE28  | ENSG00000 | 1.59   | 17.869  | -2.865 | 8.29E-94 |
| NPR2     | ENSG00000 | 3.65   | 27.729  | -2.627 | 3.27E-40 |
| TMEM234  | ENSG00000 | 6.73   | 41.76   | -2.468 | 3.59E-85 |
| KALRN    | ENSG00000 | 2.46   | 22.161  | -2.743 | 4.31E-46 |
| RSPH1    | ENSG00000 | 1.55   | 43.931  | -4.139 | 2.14E-50 |
| HSF2BP   | ENSG00000 | 0.83   | 31.73   | -4.161 | 1.93E-82 |
| PDXK     | ENSG00000 | 45.689 | 629.995 | -3.756 | 5.99E-62 |
| FTCD     | ENSG00000 | 0.54   | 64.11   | -5.402 | 2.05E-69 |
| SPATC1L  | ENSG00000 | 8.56   | 64.248  | -2.771 | 7.27E-36 |
| GPSM1    | ENSG00000 | 3.13   | 36.39   | -3.178 | 4.43E-35 |
| HIPK4    | ENSG00000 | 0.07   | 24.01   | -4.547 | 3.31E-70 |
| TMEM190  | ENSG00000 | 0.21   | 72.258  | -5.92  | 1.93E-55 |
| PPAPDC3  | ENSG00000 | 0.86   | 6.51    | -2.014 | 3.00E-68 |
| SIK3     | ENSG00000 | 6.73   | 47.441  | -2.648 | 2.46E-77 |
| LRRC71   | ENSG00000 | 0.13   | 51.739  | -5.544 | 3.07E-72 |
| LY6K     | ENSG00000 | 0.75   | 50.899  | -4.89  | 3.90E-65 |
| PPP1R16A | ENSG00000 | 20.031 | 112.454 | -2.432 | 4.82E-68 |
| PGLYRP2  | ENSG00000 | 0.03   | 6.87    | -2.934 | 2.07E-83 |
| LRWD1    | ENSG00000 | 38.689 | 403.94  | -3.351 | 4.32E-46 |

|         |           |       |          |        |           |
|---------|-----------|-------|----------|--------|-----------|
| FBXL13  | ENSG00000 | 0.69  | 20.949   | -3.699 | 3.10E-62  |
| NAPEPLD | ENSG00000 | 3.53  | 18.09    | -2.075 | 2.13E-70  |
| LRRC56  | ENSG00000 | 1.19  | 29.549   | -3.802 | 9.39E-71  |
| PLXDC1  | ENSG00000 | 3.84  | 19.271   | -2.066 | 7.03E-22  |
| GRIN2C  | ENSG00000 | 0.13  | 5.88     | -2.606 | 4.48E-111 |
| KLHL10  | ENSG00000 | 0.36  | 71.12    | -5.729 | 7.97E-70  |
| IZUMO2  | ENSG00000 | 0.24  | 86.228   | -6.136 | 2.14E-69  |
| SYCE2   | ENSG00000 | 1.22  | 36.99    | -4.097 | 3.90E-79  |
| ZNF653  | ENSG00000 | 6.61  | 43.761   | -2.556 | 8.29E-80  |
| WDR90   | ENSG00000 | 15.82 | 182.543  | -3.448 | 4.20E-84  |
| MEIOB   | ENSG00000 | 5.11  | 49.292   | -3.041 | 1.45E-34  |
| NEU3    | ENSG00000 | 2.47  | 17.27    | -2.396 | 1.05E-84  |
| PPP1R32 | ENSG00000 | 1.13  | 131.16   | -5.955 | 1.37E-87  |
| GNG3    | ENSG00000 | 0.37  | 14.78    | -3.526 | 7.23E-56  |
| ITIH3   | ENSG00000 | 0.88  | 10.56    | -2.62  | 5.28E-61  |
| TSSK3   | ENSG00000 | 0.62  | 44.501   | -4.812 | 2.85E-104 |
| UBXN10  | ENSG00000 | 0.62  | 13.86    | -3.197 | 2.09E-65  |
| TTL10   | ENSG00000 | 0.12  | 63.751   | -5.853 | 6.55E-67  |
| SCNN1D  | ENSG00000 | 1.9   | 47.751   | -4.071 | 2.44E-107 |
| LRRIQ3  | ENSG00000 | 0.58  | 17.38    | -3.54  | 2.09E-66  |
| WDR63   | ENSG00000 | 0.41  | 22.13    | -4.036 | 7.53E-66  |
| HFM1    | ENSG00000 | 1.91  | 14.48    | -2.411 | 1.13E-68  |
| SLC9C2  | ENSG00000 | 0.09  | 10.25    | -3.368 | 7.37E-107 |
| KLHDC9  | ENSG00000 | 3.53  | 137.825  | -4.938 | 6.72E-75  |
| LRRC52  | ENSG00000 | 0     | 21.04    | -4.462 | 1.76E-56  |
| FAM71A  | ENSG00000 | 0     | 98.291   | -6.634 | 4.26E-65  |
| TDRD5   | ENSG00000 | 1.88  | 21.12    | -2.941 | 2.00E-50  |
| SNED1   | ENSG00000 | 1     | 13.68    | -2.876 | 1.62E-46  |
| SPATA17 | ENSG00000 | 2.52  | 90.408   | -4.699 | 1.27E-51  |
| WDR64   | ENSG00000 | 0.04  | 8.51     | -3.193 | 9.08E-62  |
| KLHDC8A | ENSG00000 | 1.01  | 7.12     | -2.014 | 1.76E-20  |
| TRIM17  | ENSG00000 | 1.52  | 54.059   | -4.45  | 8.70E-58  |
| RFTN2   | ENSG00000 | 1.8   | 10.87    | -2.084 | 1.42E-28  |
| FAM84A  | ENSG00000 | 0.23  | 16.429   | -3.825 | 2.16E-56  |
| ZSWIM2  | ENSG00000 | 0     | 5.38     | -2.674 | 7.93E-61  |
| TEKT4   | ENSG00000 | 0.04  | 20.89    | -4.396 | 5.59E-61  |
| SPATA18 | ENSG00000 | 1.05  | 93.137   | -5.521 | 3.67E-70  |
| NOSTRIN | ENSG00000 | 3.59  | 34.22    | -2.94  | 2.44E-62  |
| INHBB   | ENSG00000 | 1.3   | 21.61    | -3.297 | 2.69E-62  |
| PDHA2   | ENSG00000 | 0     | 68.071   | -6.11  | 2.91E-81  |
| PACRGL  | ENSG00000 | 8.04  | 56.001   | -2.657 | 2.41E-63  |
| SMCP    | ENSG00000 | 0     | 1037.502 | -10.02 | 2.72E-81  |
| TDRD10  | ENSG00000 | 4.22  | 110.468  | -4.416 | 1.95E-47  |
| PAQR3   | ENSG00000 | 7.25  | 39.749   | -2.304 | 1.16E-58  |
| HIPK1   | ENSG00000 | 10.01 | 48.12    | -2.158 | 1.22E-54  |
| IGFN1   | ENSG00000 | 0.16  | 10.74    | -3.339 | 1.19E-60  |
| PROK2   | ENSG00000 | 0.32  | 10.59    | -3.134 | 4.58E-68  |
| LMOD1   | ENSG00000 | 1.48  | 21.96    | -3.211 | 3.92E-30  |
| PDCL2   | ENSG00000 | 2.68  | 77.842   | -4.421 | 1.01E-45  |

|          |           |        |          |        |          |
|----------|-----------|--------|----------|--------|----------|
| TSACC    | ENSG00000 | 9.59   | 1237.917 | -6.87  | 1.97E-63 |
| STK36    | ENSG00000 | 23.99  | 111.183  | -2.166 | 1.68E-62 |
| NEK10    | ENSG00000 | 0.56   | 30.77    | -4.348 | 3.35E-68 |
| HDAC11   | ENSG00000 | 4.56   | 122.03   | -4.468 | 2.77E-67 |
| GLB1L    | ENSG00000 | 5.81   | 87.65    | -3.702 | 8.58E-78 |
| SPTA1    | ENSG00000 | 0.1    | 3.99     | -2.182 | 1.42E-54 |
| ICA1L    | ENSG00000 | 2.23   | 12.19    | -2.03  | 6.88E-49 |
| KIAA1407 | ENSG00000 | 1.61   | 16.05    | -2.708 | 1.36E-69 |
| ERICH6   | ENSG00000 | 0.07   | 33.4     | -5.007 | 5.68E-74 |
| TIPARP   | ENSG00000 | 3.67   | 36.931   | -3.022 | 1.14E-70 |
| FANCD2O8 | ENSG00000 | 0.06   | 111.121  | -6.725 | 1.25E-73 |
| MTHFD2L  | ENSG00000 | 1.57   | 11.19    | -2.246 | 2.27E-75 |
| PLSCR2   | ENSG00000 | 0.16   | 13.65    | -3.659 | 5.99E-38 |
| SPDYA    | ENSG00000 | 0.78   | 42.94    | -4.626 | 9.44E-90 |
| ZDHHC3   | ENSG00000 | 32.901 | 156.226  | -2.213 | 9.37E-53 |
| LZTFL1   | ENSG00000 | 8.06   | 59.35    | -2.736 | 5.39E-52 |
| NMNAT3   | ENSG00000 | 2.16   | 43.431   | -3.814 | 5.31E-70 |
| IFT122   | ENSG00000 | 15.85  | 130.553  | -2.965 | 2.57E-74 |
| RPL39L   | ENSG00000 | 59.272 | 269.603  | -2.167 | 1.55E-28 |
| SFMBT1   | ENSG00000 | 6.03   | 39.11    | -2.512 | 4.74E-40 |
| UVSSA    | ENSG00000 | 3.05   | 32.13    | -3.032 | 9.29E-88 |
| ZDHHC19  | ENSG00000 | 1.68   | 114.039  | -5.424 | 9.50E-81 |
| SLC51A   | ENSG00000 | 3.84   | 29.57    | -2.659 | 1.34E-61 |
| SGMS2    | ENSG00000 | 0.5    | 9.53     | -2.811 | 1.22E-47 |
| SLC9B1   | ENSG00000 | 0.99   | 47.669   | -4.612 | 1.81E-73 |
| HSPA4L   | ENSG00000 | 1.06   | 92.27    | -5.501 | 2.83E-82 |
| GRM2     | ENSG00000 | 2.44   | 21.01    | -2.678 | 4.49E-36 |
| SCRG1    | ENSG00000 | 0.07   | 18.26    | -4.17  | 4.52E-89 |
| TMEM144  | ENSG00000 | 4.08   | 23.429   | -2.266 | 2.37E-36 |
| ZNF474   | ENSG00000 | 0.03   | 6.93     | -2.945 | 6.01E-50 |
| PRDM9    | ENSG00000 | 0.05   | 4.52     | -2.394 | 7.58E-78 |
| SPZ1     | ENSG00000 | 0.99   | 33.07    | -4.098 | 1.22E-49 |
| FAM170A  | ENSG00000 | 0      | 21.6     | -4.498 | 6.59E-78 |
| ACSL6    | ENSG00000 | 1.26   | 49.49    | -4.482 | 3.01E-71 |
| GDF9     | ENSG00000 | 0.33   | 11.46    | -3.228 | 6.94E-99 |
| STXBP5   | ENSG00000 | 2.89   | 15.14    | -2.053 | 2.73E-53 |
| HIST1H2A | ENSG00000 | 0      | 6.73     | -2.95  | 3.12E-70 |
| PI16     | ENSG00000 | 1.08   | 14.31    | -2.88  | 4.45E-16 |
| KIAA0895 | ENSG00000 | 3.19   | 21.22    | -2.407 | 9.55E-46 |
| FAM183B  | ENSG00000 | 0.06   | 35.911   | -5.122 | 2.36E-79 |
| GPR85    | ENSG00000 | 0.96   | 10.1     | -2.502 | 6.05E-37 |
| IQUB     | ENSG00000 | 0.27   | 25.069   | -4.359 | 5.11E-76 |
| SLC13A4  | ENSG00000 | 0.99   | 11.29    | -2.627 | 4.38E-15 |
| PGAM2    | ENSG00000 | 1.08   | 254.813  | -6.942 | 1.85E-69 |
| SUN3     | ENSG00000 | 3.89   | 46.311   | -3.274 | 1.12E-33 |
| SBSPON   | ENSG00000 | 1.07   | 8.88     | -2.255 | 5.99E-33 |
| OXR1     | ENSG00000 | 4.2    | 48.04    | -3.237 | 1.98E-61 |
| TMEM184  | ENSG00000 | 0.24   | 7        | -2.69  | 4.21E-27 |
| GBX1     | ENSG00000 | 0.07   | 9.06     | -3.233 | 2.39E-83 |

|           |           |       |         |        |          |
|-----------|-----------|-------|---------|--------|----------|
| OSR2      | ENSG00000 | 1.22  | 41.639  | -4.264 | 1.18E-40 |
| FREM1     | ENSG00000 | 0.6   | 8.37    | -2.55  | 7.69E-12 |
| TMEM67    | ENSG00000 | 3.96  | 20.1    | -2.089 | 4.78E-50 |
| LETM2     | ENSG00000 | 1.39  | 38.711  | -4.054 | 3.12E-67 |
| PRKACG    | ENSG00000 | 0.15  | 32.119  | -4.848 | 1.11E-69 |
| PRSS37    | ENSG00000 | 0.01  | 58.12   | -5.871 | 3.79E-70 |
| GKAP1     | ENSG00000 | 11.2  | 188.562 | -3.958 | 1.72E-51 |
| KIF27     | ENSG00000 | 2.25  | 26.969  | -3.105 | 3.87E-72 |
| SSMEM1    | ENSG00000 | 0.03  | 31.48   | -4.979 | 2.72E-68 |
| RP11-213C | ENSG00000 | 1.4   | 9.81    | -2.171 | 7.31E-66 |
| TRPV6     | ENSG00000 | 0.55  | 5.31    | -2.025 | 8.02E-32 |
| RNF183    | ENSG00000 | 0.74  | 7.99    | -2.369 | 1.91E-46 |
| LRRC18    | ENSG00000 | 0.02  | 17.01   | -4.142 | 4.31E-60 |
| PHYHIPL   | ENSG00000 | 0.23  | 31.051  | -4.704 | 3.06E-81 |
| PKNOX2    | ENSG00000 | 0.45  | 6.08    | -2.288 | 1.46E-32 |
| RPL10L    | ENSG00000 | 6.11  | 119.361 | -4.081 | 8.56E-40 |
| TMEM63C   | ENSG00000 | 0.97  | 15.47   | -3.064 | 4.87E-72 |
| NOXRED1   | ENSG00000 | 0.47  | 11.13   | -3.045 | 4.71E-65 |
| SSX3      | ENSG00000 | 0.09  | 16.89   | -4.037 | 6.69E-86 |
| VSTM4     | ENSG00000 | 0.85  | 9.56    | -2.513 | 4.33E-38 |
| SOHLH1    | ENSG00000 | 0.07  | 21.9    | -4.42  | 2.61E-97 |
| PDZD8     | ENSG00000 | 6.15  | 58.732  | -3.063 | 2.05E-39 |
| GFI1B     | ENSG00000 | 0.02  | 5.76    | -2.728 | 6.56E-63 |
| STK32C    | ENSG00000 | 7.51  | 71.818  | -3.097 | 9.75E-76 |
| PPP1R36   | ENSG00000 | 0.29  | 55.629  | -5.456 | 2.93E-77 |
| ERICH6B   | ENSG00000 | 0.34  | 5.37    | -2.249 | 2.09E-86 |
| HSPA12A   | ENSG00000 | 1.16  | 7.97    | -2.054 | 2.84E-42 |
| FAM35BP   | ENSG00000 | 0.8   | 10.15   | -2.631 | 3.47E-77 |
| UBTD1     | ENSG00000 | 16.09 | 76.962  | -2.19  | 1.59E-51 |
| SLC39A13  | ENSG00000 | 13.72 | 109.873 | -2.913 | 2.48E-76 |
| IFI27L1   | ENSG00000 | 17.67 | 140.857 | -2.926 | 1.03E-92 |
| PDZRN4    | ENSG00000 | 0.07  | 3.36    | -2.027 | 1.20E-26 |
| PASD1     | ENSG00000 | 0.3   | 15.14   | -3.634 | 5.36E-52 |
| TMCO5A    | ENSG00000 | 0     | 149.582 | -7.234 | 2.00E-75 |
| RP11-299F | ENSG00000 | 0.09  | 4.63    | -2.369 | 1.91E-56 |
| SPATA19   | ENSG00000 | 0     | 171.135 | -7.427 | 8.94E-77 |
| TBATA     | ENSG00000 | 0.02  | 32.68   | -5.045 | 1.57E-65 |
| FAM227B   | ENSG00000 | 4.1   | 19.929  | -2.037 | 9.68E-54 |
| POTED     | ENSG00000 | 0.02  | 4.04    | -2.305 | 1.48E-42 |
| WDR88     | ENSG00000 | 0.16  | 10.59   | -3.321 | 1.06E-66 |
| PPFIBP2   | ENSG00000 | 12.02 | 58.06   | -2.181 | 5.74E-41 |
| RIC3      | ENSG00000 | 3.51  | 20.53   | -2.255 | 5.05E-67 |
| XRRA1     | ENSG00000 | 3.2   | 56.172  | -3.767 | 2.80E-78 |
| TRIM66    | ENSG00000 | 1.42  | 34.251  | -3.865 | 3.04E-92 |
| TMEM130   | ENSG00000 | 0.95  | 45.759  | -4.584 | 7.75E-59 |
| MFAP4     | ENSG00000 | 6.54  | 32.43   | -2.149 | 4.83E-04 |
| TK2       | ENSG00000 | 8     | 44.01   | -2.322 | 3.29E-77 |
| IQCD      | ENSG00000 | 1.45  | 57.209  | -4.57  | 4.01E-65 |
| ZNF667-A  | ENSG00000 | 18.71 | 83.008  | -2.092 | 3.47E-56 |



|           |           |         |          |        |           |
|-----------|-----------|---------|----------|--------|-----------|
| LDHC      | ENSG00000 | 0.81    | 335.809  | -7.54  | 1.39E-83  |
| LDHAL6A   | ENSG00000 | 0.24    | 7.77     | -2.822 | 5.87E-50  |
| PLIN1     | ENSG00000 | 0.11    | 15.15    | -3.863 | 1.12E-97  |
| GPR182    | ENSG00000 | 0.06    | 7.06     | -2.927 | 6.04E-57  |
| MIR202HG  | ENSG00000 | 0.22    | 577.428  | -8.889 | 1.33E-92  |
| NYAP1     | ENSG00000 | 1.68    | 12.5     | -2.333 | 2.47E-70  |
| MS4A6E    | ENSG00000 | 0       | 125.078  | -6.978 | 6.02E-75  |
| MS4A14    | ENSG00000 | 0.42    | 111.63   | -6.31  | 2.51E-81  |
| MS4A5     | ENSG00000 | 0       | 59.659   | -5.923 | 1.61E-67  |
| EPB42     | ENSG00000 | 0.11    | 7.21     | -2.887 | 6.88E-85  |
| EVA1C     | ENSG00000 | 2.96    | 32.41    | -3.077 | 5.13E-61  |
| TCP10L2   | ENSG00000 | 0.05    | 27.249   | -4.75  | 2.17E-83  |
| NKX3-1    | ENSG00000 | 0.7     | 18.13    | -3.492 | 1.35E-63  |
| MEI1      | ENSG00000 | 9.59    | 70.8     | -2.761 | 7.58E-37  |
| TTC16     | ENSG00000 | 0.17    | 28.381   | -4.65  | 5.59E-78  |
| SUN5      | ENSG00000 | 0       | 58.72    | -5.9   | 9.77E-72  |
| TBC1D21   | ENSG00000 | 0       | 63.482   | -6.011 | 1.19E-70  |
| UGT1A6    | ENSG00000 | 0.07    | 3.85     | -2.18  | 8.39E-47  |
| ISLR2     | ENSG00000 | 0.38    | 22.7     | -4.102 | 5.01E-47  |
| GOLGA6C   | ENSG00000 | 0.03    | 9.51     | -3.351 | 1.36E-53  |
| LOXHD1    | ENSG00000 | 0.82    | 28.58    | -4.023 | 8.76E-56  |
| KATNAL2   | ENSG00000 | 2.36    | 20.99    | -2.71  | 1.90E-65  |
| ZNF91     | ENSG00000 | 12.19   | 67.4     | -2.375 | 3.85E-54  |
| RBFOX3    | ENSG00000 | 1.64    | 10.93    | -2.176 | 3.67E-30  |
| PRRT2     | ENSG00000 | 1.54    | 16.08    | -2.749 | 2.64E-47  |
| LINC00905 | ENSG00000 | 0       | 34.999   | -5.17  | 1.82E-89  |
| GPX4      | ENSG00000 | 283.419 | 1968.252 | -2.792 | 1.70E-51  |
| NOS2P2    | ENSG00000 | 0       | 9.53     | -3.396 | 3.23E-48  |
| SPATA33   | ENSG00000 | 6.39    | 190.916  | -4.699 | 4.12E-72  |
| PROCA1    | ENSG00000 | 8.72    | 348.858  | -5.17  | 3.24E-63  |
| PROSER3   | ENSG00000 | 8.24    | 41.619   | -2.206 | 1.44E-43  |
| TTYH1     | ENSG00000 | 15.73   | 94.359   | -2.511 | 1.76E-33  |
| LENG8     | ENSG00000 | 36.859  | 275.727  | -2.87  | 8.05E-103 |
| PPP1R14A  | ENSG00000 | 20.92   | 100.141  | -2.206 | 2.40E-40  |
| GPT       | ENSG00000 | 0.18    | 6.67     | -2.7   | 5.89E-82  |
| KIFC2     | ENSG00000 | 5.97    | 51.069   | -2.901 | 2.06E-87  |
| SERPINF2  | ENSG00000 | 1.58    | 14.84    | -2.618 | 1.89E-23  |
| KLK2      | ENSG00000 | 1.22    | 38.63    | -4.158 | 4.33E-61  |
| KLK5      | ENSG00000 | 0.73    | 18.52    | -3.496 | 1.14E-31  |
| KLK11     | ENSG00000 | 0.15    | 28.499   | -4.681 | 3.25E-56  |
| TEKT1     | ENSG00000 | 0.05    | 37.731   | -5.205 | 2.70E-59  |
| TMEM99    | ENSG00000 | 11.03   | 139.14   | -3.542 | 2.85E-76  |
| RAB3IL1   | ENSG00000 | 7.68    | 60.12    | -2.816 | 4.52E-65  |
| HRASLS5   | ENSG00000 | 1.75    | 84.01    | -4.95  | 4.62E-78  |
| TTC21A    | ENSG00000 | 3.11    | 141.847  | -5.119 | 8.20E-96  |
| ULK4      | ENSG00000 | 4.1     | 26.259   | -2.418 | 1.35E-45  |
| HIST3H3   | ENSG00000 | 0       | 3.48     | -2.163 | 2.38E-58  |
| KIF5C     | ENSG00000 | 5.2     | 38.499   | -2.671 | 3.73E-61  |
| FAM107A   | ENSG00000 | 0.86    | 7.05     | -2.114 | 7.62E-14  |

|           |           |       |         |        |           |
|-----------|-----------|-------|---------|--------|-----------|
| MOBP      | ENSG00000 | 0.23  | 16.28   | -3.812 | 7.40E-78  |
| LINC00917 | ENSG00000 | 0.03  | 138.102 | -7.077 | 8.22E-75  |
| FILIP1L   | ENSG00000 | 4.2   | 21.54   | -2.116 | 1.55E-28  |
| MFSD2A    | ENSG00000 | 7.79  | 53.742  | -2.639 | 8.20E-46  |
| HR        | ENSG00000 | 2.11  | 20.129  | -2.764 | 6.91E-35  |
| TXNDC2    | ENSG00000 | 0.03  | 149.872 | -7.195 | 7.77E-73  |
| TNXB      | ENSG00000 | 4.15  | 22.689  | -2.202 | 2.29E-38  |
| SFTPC     | ENSG00000 | 0     | 5.07    | -2.602 | 1.33E-49  |
| PHYHIP    | ENSG00000 | 0.46  | 12.63   | -3.223 | 7.95E-67  |
| GFRA2     | ENSG00000 | 1.16  | 12.22   | -2.614 | 3.39E-32  |
| VWA3B     | ENSG00000 | 0.36  | 85.342  | -5.988 | 2.22E-66  |
| LDLRAD4   | ENSG00000 | 1.55  | 17.57   | -2.864 | 7.70E-50  |
| KCTD19    | ENSG00000 | 0.52  | 79.522  | -5.727 | 6.45E-85  |
| TSPY2     | ENSG00000 | 0.86  | 20.559  | -3.535 | 6.04E-12  |
| SHOX2     | ENSG00000 | 0.45  | 5.58    | -2.182 | 7.38E-24  |
| PIIP5K1   | ENSG00000 | 4.31  | 27.389  | -2.419 | 8.56E-71  |
| LRRC28    | ENSG00000 | 10.1  | 50.059  | -2.202 | 1.18E-47  |
| SLC35G2   | ENSG00000 | 1.09  | 18.79   | -3.243 | 1.54E-94  |
| FEM1B     | ENSG00000 | 11.89 | 91.448  | -2.842 | 5.03E-54  |
| MFSD7     | ENSG00000 | 4.34  | 28.34   | -2.458 | 3.09E-34  |
| VCX3A     | ENSG00000 | 1.15  | 88.781  | -5.384 | 7.18E-55  |
| ZBBX      | ENSG00000 | 0.8   | 51.239  | -4.859 | 1.50E-62  |
| GOT1L1    | ENSG00000 | 0     | 18.539  | -4.288 | 1.92E-58  |
| IL13      | ENSG00000 | 0.02  | 57.531  | -5.843 | 5.15E-76  |
| GCSAML    | ENSG00000 | 0.06  | 3.76    | -2.167 | 4.65E-83  |
| THBS3     | ENSG00000 | 8.33  | 101.567 | -3.459 | 2.17E-68  |
| SH3TC2    | ENSG00000 | 0.67  | 11.52   | -2.906 | 3.02E-85  |
| SHE       | ENSG00000 | 5.06  | 28.57   | -2.287 | 1.58E-34  |
| NR0B1     | ENSG00000 | 0.6   | 23.6    | -3.943 | 1.51E-84  |
| PDILT     | ENSG00000 | 0     | 22.59   | -4.56  | 1.15E-65  |
| RSPH10B2  | ENSG00000 | 0.92  | 21.48   | -3.549 | 2.24E-36  |
| SCN9A     | ENSG00000 | 0.14  | 4.44    | -2.255 | 1.54E-77  |
| GJB1      | ENSG00000 | 0.33  | 13.67   | -3.463 | 1.93E-26  |
| RGPD8     | ENSG00000 | 2.05  | 17.17   | -2.575 | 1.35E-41  |
| NRG4      | ENSG00000 | 0.82  | 15.42   | -3.173 | 1.65E-57  |
| NLGN1     | ENSG00000 | 0.41  | 6.28    | -2.368 | 9.61E-46  |
| TAPT1     | ENSG00000 | 4.96  | 38.289  | -2.721 | 1.66E-84  |
| ONECUT1   | ENSG00000 | 0.07  | 4.66    | -2.403 | 1.03E-54  |
| OTUD7A    | ENSG00000 | 0.57  | 5.85    | -2.125 | 2.49E-76  |
| ZFPM2     | ENSG00000 | 0.67  | 6.16    | -2.1   | 1.58E-35  |
| HSFY2     | ENSG00000 | 0.01  | 15.65   | -4.043 | 5.10E-52  |
| FAM153A   | ENSG00000 | 0.56  | 139.913 | -6.497 | 8.23E-124 |
| SIMC1     | ENSG00000 | 3.15  | 37.919  | -3.229 | 9.87E-71  |
| HMP19     | ENSG00000 | 0.08  | 19.231  | -4.227 | 6.91E-65  |
| USP50     | ENSG00000 | 0.78  | 14.68   | -3.139 | 1.39E-51  |
| FAM161A   | ENSG00000 | 3.94  | 19.08   | -2.023 | 3.82E-40  |
| FAXDC2    | ENSG00000 | 3.32  | 18.78   | -2.195 | 5.17E-39  |
| STX8      | ENSG00000 | 29.48 | 122.326 | -2.017 | 3.60E-41  |
| FRMPD2    | ENSG00000 | 0.06  | 12.66   | -3.688 | 1.10E-58  |

|          |           |        |         |        |          |
|----------|-----------|--------|---------|--------|----------|
| KRT86    | ENSG00000 | 0.09   | 5.18    | -2.503 | 5.44E-54 |
| SPATA24  | ENSG00000 | 4.95   | 188.535 | -4.993 | 3.42E-66 |
| NPAS2    | ENSG00000 | 2.34   | 23.659  | -2.884 | 2.18E-58 |
| KRT72    | ENSG00000 | 0.06   | 31.21   | -4.925 | 4.62E-66 |
| KISS1    | ENSG00000 | 0.49   | 5.82    | -2.194 | 3.01E-21 |
| FAM71B   | ENSG00000 | 0      | 39.62   | -5.344 | 4.57E-64 |
| TTLL6    | ENSG00000 | 0.99   | 37.229  | -4.264 | 4.14E-66 |
| RBMXL2   | ENSG00000 | 6.81   | 46.96   | -2.618 | 5.19E-31 |
| GPR37    | ENSG00000 | 1.73   | 13.66   | -2.425 | 2.90E-38 |
| TPD52L3  | ENSG00000 | 0      | 143.349 | -7.173 | 3.68E-85 |
| USP32    | ENSG00000 | 27.889 | 115.607 | -2.013 | 1.76E-38 |
| RNF139   | ENSG00000 | 16.04  | 81.701  | -2.279 | 1.05E-55 |
| PLA2G1B  | ENSG00000 | 0.1    | 5.22    | -2.499 | 1.32E-59 |
| TPT1-AS1 | ENSG00000 | 10.54  | 131.379 | -3.52  | 2.22E-73 |
| TANC2    | ENSG00000 | 3.6    | 22.389  | -2.346 | 8.87E-53 |
| NCBP2L   | ENSG00000 | 0      | 3.09    | -2.032 | 5.09E-49 |
| MBD3L1   | ENSG00000 | 0.03   | 35.009  | -5.128 | 4.17E-63 |
| PGK2     | ENSG00000 | 0      | 181.697 | -7.513 | 1.90E-78 |
| ZNF415   | ENSG00000 | 4.42   | 29.97   | -2.514 | 3.36E-70 |
| PRKCDBP  | ENSG00000 | 10.51  | 191.114 | -4.061 | 2.06E-59 |
| XKR6     | ENSG00000 | 1.49   | 9.54    | -2.082 | 6.30E-65 |
| OBP2B    | ENSG00000 | 0.03   | 13.62   | -3.827 | 7.31E-73 |
| FUT3     | ENSG00000 | 0.25   | 4.59    | -2.161 | 2.01E-37 |
| PRKCE    | ENSG00000 | 0.96   | 22.98   | -3.613 | 2.55E-67 |
| KRT15    | ENSG00000 | 0.41   | 25.221  | -4.217 | 1.83E-24 |
| LURAP1   | ENSG00000 | 1.5    | 10.98   | -2.261 | 1.32E-58 |
| KRT13    | ENSG00000 | 0.12   | 14.84   | -3.822 | 6.11E-23 |
| HOPX     | ENSG00000 | 6.11   | 59.149  | -3.081 | 4.13E-50 |
| SPACA5B  | ENSG00000 | 0      | 32.969  | -5.086 | 8.98E-64 |
| SPACA5   | ENSG00000 | 0.05   | 13.33   | -3.771 | 1.92E-66 |
| MROH2B   | ENSG00000 | 0.01   | 37.509  | -5.253 | 5.29E-75 |
| LPAR3    | ENSG00000 | 1.29   | 9.21    | -2.157 | 1.77E-59 |
| MAP6     | ENSG00000 | 2.12   | 23.9    | -2.997 | 8.81E-53 |
| LKAAEAR1 | ENSG00000 | 0.15   | 43.561  | -5.276 | 2.34E-63 |
| TCEA2    | ENSG00000 | 29.991 | 157.084 | -2.351 | 8.17E-57 |
| LRRC34   | ENSG00000 | 2.03   | 18.59   | -2.693 | 1.89E-45 |
| PAH      | ENSG00000 | 0.46   | 13.37   | -3.299 | 4.95E-48 |
| GATM     | ENSG00000 | 5.44   | 59.8    | -3.239 | 2.34E-66 |
| SYCE1    | ENSG00000 | 3.12   | 131.99  | -5.013 | 3.30E-68 |
| SLFNL1   | ENSG00000 | 0.29   | 97.937  | -6.261 | 1.43E-77 |
| WDR87    | ENSG00000 | 0.15   | 13.3    | -3.636 | 1.98E-65 |
| PWWP2B   | ENSG00000 | 3.56   | 22.299  | -2.353 | 2.81E-58 |
| FBXL14   | ENSG00000 | 12.7   | 55.441  | -2.043 | 2.13E-30 |
| TRAPPC12 | ENSG00000 | 53.809 | 248.395 | -2.186 | 4.12E-51 |
| PRND     | ENSG00000 | 0.69   | 74.899  | -5.489 | 2.03E-67 |
| KLF17    | ENSG00000 | 0.31   | 15.81   | -3.682 | 5.38E-24 |
| FBXW10   | ENSG00000 | 0.04   | 12.77   | -3.727 | 7.77E-73 |
| FOXB1    | ENSG00000 | 0.08   | 3.62    | -2.097 | 7.64E-33 |
| LRRC48   | ENSG00000 | 1.26   | 32.11   | -3.873 | 1.03E-77 |

|          |           |        |         |        |          |
|----------|-----------|--------|---------|--------|----------|
| LDHAL6B  | ENSG00000 | 0.03   | 36.111  | -5.171 | 5.75E-89 |
| TEX37    | ENSG00000 | 0.6    | 106.498 | -6.07  | 1.95E-52 |
| SLC9C1   | ENSG00000 | 0.02   | 4.21    | -2.353 | 8.51E-59 |
| FRMD3    | ENSG00000 | 0.69   | 13.76   | -3.127 | 7.45E-67 |
| TPSAB1   | ENSG00000 | 0.23   | 8.43    | -2.939 | 7.31E-20 |
| SERHL    | ENSG00000 | 0.38   | 15.82   | -3.607 | 1.18E-83 |
| MACROD2  | ENSG00000 | 1.04   | 7.61    | -2.077 | 1.31E-66 |
| SPTLC3   | ENSG00000 | 0.36   | 4.55    | -2.029 | 1.19E-32 |
| FAM195A  | ENSG00000 | 23.691 | 103.737 | -2.085 | 2.49E-50 |
| RSPH9    | ENSG00000 | 1.01   | 20.29   | -3.405 | 8.58E-59 |
| PRSS30P  | ENSG00000 | 0.57   | 19.87   | -3.733 | 4.52E-87 |
| TCEAL1   | ENSG00000 | 5.07   | 30.279  | -2.365 | 9.93E-36 |
| HSFY1    | ENSG00000 | 0      | 9.77    | -3.429 | 3.22E-30 |
| FAM170B  | ENSG00000 | 0      | 7.01    | -3.002 | 4.18E-48 |
| SNTG2    | ENSG00000 | 0.38   | 10.75   | -3.09  | 3.48E-72 |
| ZFAND4   | ENSG00000 | 3.44   | 74.847  | -4.094 | 6.52E-73 |
| FAM71D   | ENSG00000 | 0.1    | 41.12   | -5.259 | 8.13E-68 |
| LRRC20   | ENSG00000 | 2.99   | 15.47   | -2.045 | 2.64E-37 |
| TMEM217  | ENSG00000 | 0.74   | 22.63   | -3.763 | 2.12E-83 |
| SNX32    | ENSG00000 | 0.54   | 10.07   | -2.846 | 5.38E-85 |
| OVOL1    | ENSG00000 | 0.7    | 47.019  | -4.82  | 1.19E-43 |
| NBEA     | ENSG00000 | 0.54   | 5.56    | -2.091 | 4.19E-44 |
| XKR3     | ENSG00000 | 0.01   | 7.85    | -3.131 | 1.44E-49 |
| SH3RF3   | ENSG00000 | 0.61   | 5.5     | -2.013 | 6.87E-41 |
| LRRN3    | ENSG00000 | 0.51   | 8.93    | -2.717 | 2.43E-38 |
| PLAC8L1  | ENSG00000 | 0.31   | 21.941  | -4.13  | 2.43E-58 |
| SLC2A14  | ENSG00000 | 9.31   | 60.442  | -2.575 | 1.50E-17 |
| GPR137   | ENSG00000 | 30.681 | 335.227 | -3.408 | 1.15E-83 |
| NDNF     | ENSG00000 | 0.06   | 11.63   | -3.575 | 5.13E-49 |
| IQCF1    | ENSG00000 | 0.49   | 147.604 | -6.64  | 1.99E-59 |
| GLIPR1L1 | ENSG00000 | 0.03   | 37.431  | -5.222 | 6.02E-60 |
| THAP2    | ENSG00000 | 1.94   | 18.65   | -2.741 | 2.21E-62 |
| RNASE11  | ENSG00000 | 0      | 68.251  | -6.114 | 4.34E-73 |
| MST1     | ENSG00000 | 11.9   | 115.239 | -3.172 | 1.98E-76 |
| PC       | ENSG00000 | 5.14   | 41.55   | -2.793 | 5.94E-66 |
| LRFN4    | ENSG00000 | 4.38   | 33.901  | -2.698 | 6.93E-59 |
| HSPB7    | ENSG00000 | 0.58   | 28.779  | -4.236 | 1.33E-63 |
| TAS1R1   | ENSG00000 | 0.21   | 5.3     | -2.38  | 2.32E-68 |
| SPATA3   | ENSG00000 | 0      | 252.09  | -7.984 | 1.71E-73 |
| TIGD3    | ENSG00000 | 0.27   | 6.3     | -2.523 | 1.06E-80 |
| 10-Mar   | ENSG00000 | 0.2    | 216.781 | -7.504 | 7.61E-87 |
| PHOSPHO: | ENSG00000 | 0.81   | 119.51  | -6.057 | 4.16E-59 |
| SPTBN2   | ENSG00000 | 6.27   | 138.533 | -4.263 | 2.58E-52 |
| 3-Mar    | ENSG00000 | 2.39   | 34.589  | -3.392 | 1.62E-80 |
| LRRC63   | ENSG00000 | 0.29   | 4.71    | -2.146 | 6.76E-49 |
| SPERT    | ENSG00000 | 0.06   | 122.742 | -6.867 | 1.86E-72 |
| FAM174A  | ENSG00000 | 6.98   | 36.259  | -2.223 | 3.25E-84 |
| FAM53A   | ENSG00000 | 2.59   | 26.9    | -2.958 | 1.06E-54 |
| GSTA3    | ENSG00000 | 0.86   | 9.25    | -2.462 | 7.27E-33 |

|           |           |       |          |         |          |
|-----------|-----------|-------|----------|---------|----------|
| SNX31     | ENSG00000 | 0.19  | 4.25     | -2.141  | 5.85E-19 |
| ZNHIT2    | ENSG00000 | 9.72  | 86.138   | -3.023  | 6.24E-60 |
| EVX2      | ENSG00000 | 0.01  | 3.8      | -2.249  | 1.57E-44 |
| ZHX3      | ENSG00000 | 4.5   | 40.481   | -2.915  | 8.29E-54 |
| PODN      | ENSG00000 | 3.26  | 33.581   | -3.021  | 5.57E-29 |
| STAG3L3   | ENSG00000 | 10.82 | 78.809   | -2.755  | 1.73E-64 |
| RP11-313F | ENSG00000 | 6.41  | 31.97    | -2.154  | 1.38E-70 |
| GTF2IRD2B | ENSG00000 | 4.1   | 26.07    | -2.408  | 3.54E-41 |
| STARD6    | ENSG00000 | 0.06  | 19.74    | -4.29   | 1.05E-72 |
| GOLGA6L2  | ENSG00000 | 0     | 52.45    | -5.74   | 1.20E-66 |
| KLK15     | ENSG00000 | 0.09  | 4.73     | -2.394  | 1.25E-79 |
| IL20RB    | ENSG00000 | 1.18  | 10.44    | -2.392  | 2.89E-30 |
| IQCK      | ENSG00000 | 4.06  | 42.101   | -3.091  | 6.97E-64 |
| PCP2      | ENSG00000 | 0.62  | 169.377  | -6.717  | 7.61E-75 |
| PTDSS2    | ENSG00000 | 18.23 | 107.418  | -2.495  | 4.78E-62 |
| KCTD13    | ENSG00000 | 12.22 | 104.43   | -2.995  | 9.75E-99 |
| TEX36     | ENSG00000 | 0     | 29.03    | -4.908  | 1.47E-60 |
| ZDHHHC14  | ENSG00000 | 3.04  | 16.8     | -2.14   | 1.62E-53 |
| FAM182B   | ENSG00000 | 1.47  | 35.221   | -3.874  | 7.05E-47 |
| PPM1E     | ENSG00000 | 0.58  | 7.39     | -2.409  | 1.37E-53 |
| HIGD2B    | ENSG00000 | 0.04  | 4.76     | -2.47   | 9.88E-64 |
| NPPA      | ENSG00000 | 0.36  | 4.7      | -2.067  | 1.67E-34 |
| GOLGA8A   | ENSG00000 | 26.08 | 118.668  | -2.144  | 2.17E-30 |
| VWA3A     | ENSG00000 | 0.06  | 12.46    | -3.666  | 2.53E-57 |
| PHYKPL    | ENSG00000 | 13.28 | 96.857   | -2.777  | 1.48E-88 |
| NRIP3     | ENSG00000 | 3.92  | 47.751   | -3.309  | 2.21E-52 |
| RFESD     | ENSG00000 | 2.74  | 17.259   | -2.288  | 7.21E-50 |
| TSGA10IP  | ENSG00000 | 1.29  | 15.47    | -2.846  | 2.51E-35 |
| UBQLNL    | ENSG00000 | 0.23  | 37.959   | -4.985  | 1.95E-72 |
| UBQLN3    | ENSG00000 | 0.02  | 205.101  | -7.659  | 1.53E-74 |
| UCP3      | ENSG00000 | 0.65  | 7.19     | -2.311  | 1.96E-83 |
| PRM1      | ENSG00000 | 0.1   | 17993.65 | -13.998 | 7.84E-77 |
| TOM1L2    | ENSG00000 | 7.41  | 56.199   | -2.766  | 5.42E-82 |
| TEX26     | ENSG00000 | 0     | 42.541   | -5.444  | 1.39E-72 |
| GOLGA8EP  | ENSG00000 | 0     | 11.35    | -3.626  | 3.61E-64 |
| LINC00521 | ENSG00000 | 0     | 28.879   | -4.901  | 8.05E-70 |
| TTLL11    | ENSG00000 | 1.44  | 18.27    | -2.981  | 9.25E-73 |
| RP11-121M | ENSG00000 | 0.28  | 13.9     | -3.541  | 7.54E-58 |
| ZNF645    | ENSG00000 | 0     | 10.71    | -3.55   | 8.33E-62 |
| SWI5      | ENSG00000 | 23.33 | 203.459  | -3.071  | 3.40E-62 |
| WBSCR28   | ENSG00000 | 0     | 126.956  | -7      | 1.67E-72 |
| HOXD8     | ENSG00000 | 1.3   | 23.95    | -3.439  | 5.81E-95 |
| ZNF683    | ENSG00000 | 1.27  | 105.441  | -5.551  | 1.02E-54 |
| HSF5      | ENSG00000 | 0.15  | 31.139   | -4.805  | 6.55E-81 |
| FOXG1     | ENSG00000 | 0.2   | 5.06     | -2.336  | 3.50E-58 |
| ENTHD1    | ENSG00000 | 0.08  | 8.4      | -3.122  | 5.93E-93 |
| HMGB4     | ENSG00000 | 0.02  | 1033.913 | -9.987  | 1.46E-82 |
| SLCO3A1   | ENSG00000 | 6.85  | 62.141   | -3.008  | 6.85E-78 |
| PLA2G16   | ENSG00000 | 21.08 | 174.332  | -2.989  | 3.65E-46 |

|           |           |        |         |        |          |
|-----------|-----------|--------|---------|--------|----------|
| GNG7      | ENSG00000 | 1.46   | 11.18   | -2.308 | 3.40E-62 |
| MAP3K19   | ENSG00000 | 0.3    | 14.28   | -3.555 | 2.35E-35 |
| MEX3C     | ENSG00000 | 17.94  | 145.431 | -2.951 | 2.96E-49 |
| HORMAD2   | ENSG00000 | 0.09   | 24.591  | -4.553 | 5.02E-88 |
| TGIF2LY   | ENSG00000 | 0      | 4.92    | -2.566 | 1.30E-40 |
| PFN4      | ENSG00000 | 0.33   | 133.796 | -6.663 | 8.38E-88 |
| MAGEB6    | ENSG00000 | 0.24   | 4.12    | -2.046 | 7.33E-45 |
| LRRC37A3  | ENSG00000 | 3.55   | 36.77   | -3.053 | 3.34E-75 |
| MIR7-3HG  | ENSG00000 | 0      | 18.03   | -4.25  | 1.97E-63 |
| MAMSTR    | ENSG00000 | 1.61   | 11.66   | -2.278 | 7.82E-44 |
| MUC20     | ENSG00000 | 1.45   | 13.75   | -2.59  | 9.21E-21 |
| FMR1NB    | ENSG00000 | 0.1    | 76.818  | -6.145 | 4.31E-85 |
| TMEM80    | ENSG00000 | 6.9    | 47.871  | -2.629 | 4.03E-90 |
| MRVI1-AS  | ENSG00000 | 0.13   | 216.405 | -7.588 | 3.61E-87 |
| LINC00982 | ENSG00000 | 0.55   | 42.579  | -4.813 | 9.39E-70 |
| FAM9B     | ENSG00000 | 0.36   | 8.08    | -2.739 | 2.33E-44 |
| SPACA4    | ENSG00000 | 0.06   | 161.064 | -7.256 | 8.97E-77 |
| FBXO39    | ENSG00000 | 0.22   | 39.24   | -5.044 | 2.05E-66 |
| ZBTB38    | ENSG00000 | 5.02   | 25.43   | -2.134 | 1.98E-44 |
| OVOS2     | ENSG00000 | 19.73  | 134.969 | -2.713 | 3.28E-22 |
| FLJ40194  | ENSG00000 | 0.01   | 52.928  | -5.739 | 5.01E-66 |
| UBE2U     | ENSG00000 | 0.15   | 45.591  | -5.34  | 3.08E-65 |
| RBM44     | ENSG00000 | 0.16   | 13.96   | -3.689 | 2.88E-89 |
| VCX2      | ENSG00000 | 0.05   | 24.35   | -4.594 | 3.20E-62 |
| FAM187B   | ENSG00000 | 0.02   | 87.869  | -6.445 | 8.20E-72 |
| PVRL3     | ENSG00000 | 1.59   | 36.491  | -3.856 | 3.65E-69 |
| SPATA31C  | ENSG00000 | 0.11   | 16.47   | -3.976 | 1.56E-63 |
| MAMDC4    | ENSG00000 | 3.39   | 17.09   | -2.043 | 2.57E-41 |
| ODF3      | ENSG00000 | 0.01   | 11.84   | -3.668 | 6.00E-56 |
| SPATA31E  | ENSG00000 | 0.09   | 9.27    | -3.236 | 3.50E-47 |
| TSPYL6    | ENSG00000 | 0.38   | 20.53   | -3.964 | 2.79E-51 |
| MLF1      | ENSG00000 | 16.979 | 527.928 | -4.879 | 5.48E-67 |
| NDUFAF3   | ENSG00000 | 52.508 | 487.513 | -3.191 | 3.96E-66 |
| GRAMD1C   | ENSG00000 | 1.79   | 20.01   | -2.913 | 3.42E-62 |
| TSSK6     | ENSG00000 | 1.01   | 267.333 | -7.061 | 7.66E-74 |
| GOLGA8Q   | ENSG00000 | 0.14   | 8.91    | -3.12  | 7.57E-65 |
| PPP1R42   | ENSG00000 | 0.08   | 32.981  | -4.976 | 3.78E-77 |
| FAR2P2    | ENSG00000 | 8.01   | 62.9    | -2.826 | 9.03E-55 |
| RNF212    | ENSG00000 | 1.18   | 23.19   | -3.472 | 1.98E-66 |
| PRM3      | ENSG00000 | 0      | 101.948 | -6.686 | 1.70E-72 |
| TNP2      | ENSG00000 | 0      | 51.041  | -5.702 | 5.14E-57 |
| TMPRSS9   | ENSG00000 | 0.2    | 7.75    | -2.866 | 4.18E-80 |
| FAM220A   | ENSG00000 | 17.85  | 95.862  | -2.361 | 1.19E-40 |
| MCMDC2    | ENSG00000 | 0.42   | 9.92    | -2.943 | 4.11E-76 |
| P4HTM     | ENSG00000 | 5.18   | 41.969  | -2.798 | 1.34E-61 |
| KLHL11    | ENSG00000 | 1.76   | 12.14   | -2.251 | 2.51E-30 |
| PSAPL1    | ENSG00000 | 0.02   | 5.93    | -2.764 | 4.07E-53 |
| PARP10    | ENSG00000 | 16.3   | 69.632  | -2.03  | 2.15E-42 |
| THBD      | ENSG00000 | 1.64   | 9.75    | -2.026 | 6.36E-25 |

|           |           |        |         |        |           |
|-----------|-----------|--------|---------|--------|-----------|
| FAM132B   | ENSG00000 | 1.46   | 22.899  | -3.28  | 3.18E-47  |
| GDPD4     | ENSG00000 | 1.28   | 24.25   | -3.469 | 8.16E-32  |
| RIIAD1    | ENSG00000 | 0.7    | 22.83   | -3.809 | 4.41E-56  |
| H1FOO     | ENSG00000 | 0.04   | 9.26    | -3.302 | 1.59E-55  |
| TRIM73    | ENSG00000 | 0.81   | 23.831  | -3.778 | 9.05E-119 |
| OPLAH     | ENSG00000 | 2.88   | 93.428  | -4.605 | 2.02E-73  |
| TMEM52    | ENSG00000 | 2.7    | 42.929  | -3.57  | 1.09E-71  |
| ERICH3    | ENSG00000 | 0.04   | 46.391  | -5.51  | 2.25E-73  |
| EXD1      | ENSG00000 | 0.16   | 29.941  | -4.737 | 5.85E-88  |
| PER1      | ENSG00000 | 12.42  | 72.71   | -2.457 | 1.36E-63  |
| GGN       | ENSG00000 | 0.68   | 153.958 | -6.527 | 5.84E-75  |
| SIGLECL1  | ENSG00000 | 0.07   | 26.79   | -4.699 | 6.58E-69  |
| NSUN7     | ENSG00000 | 1.59   | 14.3    | -2.562 | 3.11E-46  |
| WSCD1     | ENSG00000 | 2.42   | 25.01   | -2.927 | 1.75E-36  |
| TMEM31    | ENSG00000 | 1.07   | 136.361 | -6.052 | 2.07E-59  |
| GPC5      | ENSG00000 | 0.07   | 3.33    | -2.017 | 1.75E-67  |
| LINC00174 | ENSG00000 | 5.93   | 32.251  | -2.262 | 1.20E-39  |
| SHARPIN   | ENSG00000 | 54.36  | 266.039 | -2.27  | 2.07E-60  |
| LSMEM2    | ENSG00000 | 0.3    | 4.62    | -2.112 | 3.84E-58  |
| RNF151    | ENSG00000 | 0.1    | 260.293 | -7.892 | 1.70E-76  |
| PLD6      | ENSG00000 | 2.98   | 27.851  | -2.858 | 7.09E-71  |
| GRM8      | ENSG00000 | 0.22   | 8.74    | -2.997 | 1.08E-46  |
| TPPP2     | ENSG00000 | 0.08   | 440.225 | -8.674 | 5.53E-76  |
| LINC00305 | ENSG00000 | 0.05   | 6.4     | -2.817 | 8.57E-49  |
| KIAA1875  | ENSG00000 | 0.71   | 31.169  | -4.234 | 9.45E-80  |
| SYCN      | ENSG00000 | 0      | 35.36   | -5.184 | 4.59E-88  |
| LRRC3B    | ENSG00000 | 0.07   | 6.49    | -2.807 | 7.47E-44  |
| PCBP1-AS1 | ENSG00000 | 12.39  | 56.551  | -2.104 | 6.59E-35  |
| PDXDC1    | ENSG00000 | 29.761 | 152.249 | -2.317 | 1.26E-49  |
| NRXN1     | ENSG00000 | 0.38   | 8.53    | -2.788 | 5.19E-43  |
| GOLGA8J   | ENSG00000 | 0.04   | 6.3     | -2.811 | 3.24E-67  |
| RP11-1319 | ENSG00000 | 0.55   | 9.91    | -2.815 | 2.27E-63  |
| FAM71E2   | ENSG00000 | 0      | 45.241  | -5.531 | 8.87E-68  |
| WFDC11    | ENSG00000 | 0      | 4.73    | -2.518 | 2.96E-54  |
| EXOC3     | ENSG00000 | 15.64  | 85.241  | -2.374 | 2.13E-79  |
| TDRD6     | ENSG00000 | 1.46   | 40.07   | -4.061 | 5.89E-84  |
| FAR2P1    | ENSG00000 | 0.74   | 91.448  | -5.732 | 6.46E-48  |
| FAM71C    | ENSG00000 | 0      | 35.25   | -5.18  | 3.74E-69  |
| PRNT      | ENSG00000 | 0      | 9.73    | -3.424 | 8.34E-42  |
| MGC45922  | ENSG00000 | 0.3    | 11.79   | -3.298 | 1.42E-85  |
| HARBI1    | ENSG00000 | 2.79   | 14.18   | -2.002 | 2.12E-44  |
| GLIPR1L2  | ENSG00000 | 0.16   | 30.67   | -4.771 | 9.89E-87  |
| TSPYL5    | ENSG00000 | 7.43   | 46.639  | -2.499 | 3.68E-49  |
| PIPSL     | ENSG00000 | 0.25   | 14.84   | -3.664 | 1.69E-61  |
| LSMEM1    | ENSG00000 | 0.56   | 7.52    | -2.449 | 1.78E-79  |
| MAPK15    | ENSG00000 | 1.55   | 71.619  | -4.832 | 3.00E-69  |
| RP11-429J | ENSG00000 | 0.41   | 6.89    | -2.484 | 3.02E-74  |
| HLA-V     | ENSG00000 | 0.07   | 5.02    | -2.492 | 8.61E-62  |
| PJA1      | ENSG00000 | 7.04   | 33.079  | -2.084 | 2.64E-18  |

|           |           |       |         |        |           |
|-----------|-----------|-------|---------|--------|-----------|
| PENK      | ENSG00000 | 1.23  | 175.095 | -6.303 | 8.36E-72  |
| SLC25A41  | ENSG00000 | 0.21  | 14.44   | -3.674 | 8.45E-71  |
| NME9      | ENSG00000 | 0.44  | 7.91    | -2.629 | 2.17E-67  |
| SPEM1     | ENSG00000 | 0.19  | 90.49   | -6.265 | 1.96E-69  |
| SAGE1     | ENSG00000 | 0.01  | 4.29    | -2.389 | 5.65E-82  |
| MEX3D     | ENSG00000 | 16.64 | 107.187 | -2.617 | 1.01E-38  |
| GPR135    | ENSG00000 | 0.16  | 28.929  | -4.689 | 6.27E-84  |
| ZBTB20    | ENSG00000 | 0.22  | 21.5    | -4.205 | 4.74E-79  |
| ODF3L2    | ENSG00000 | 0.2   | 66.712  | -5.818 | 8.24E-66  |
| FTMT      | ENSG00000 | 0.23  | 71.491  | -5.881 | 2.11E-67  |
| GOLGA8CP  | ENSG00000 | 0     | 18.67   | -4.298 | 2.01E-74  |
| LINC00301 | ENSG00000 | 0     | 112.29  | -6.824 | 6.85E-81  |
| MGAT4C    | ENSG00000 | 0.1   | 7.26    | -2.909 | 5.91E-64  |
| RP11-69E1 | ENSG00000 | 5.12  | 26.13   | -2.148 | 1.07E-45  |
| FAM153B   | ENSG00000 | 0.69  | 215.209 | -6.999 | 4.86E-146 |
| GABRG3    | ENSG00000 | 0.1   | 9.89    | -3.307 | 7.69E-58  |
| IZUMO1    | ENSG00000 | 0.14  | 44.941  | -5.333 | 1.11E-74  |
| SPACA6P   | ENSG00000 | 5.75  | 54.409  | -3.037 | 6.05E-86  |
| YBEY      | ENSG00000 | 20.54 | 105.419 | -2.305 | 5.42E-36  |
| TEX19     | ENSG00000 | 0.33  | 36.839  | -4.83  | 3.99E-77  |
| VCX       | ENSG00000 | 1.11  | 59.56   | -4.843 | 9.46E-45  |
| PPP1R27   | ENSG00000 | 0.1   | 6.27    | -2.724 | 9.00E-55  |
| RGS6      | ENSG00000 | 0.24  | 15.38   | -3.724 | 9.33E-60  |
| PAQR7     | ENSG00000 | 5.73  | 61.75   | -3.221 | 8.26E-94  |
| MAFA      | ENSG00000 | 0.41  | 4.93    | -2.072 | 1.36E-22  |
| GRID1     | ENSG00000 | 0.45  | 5.78    | -2.225 | 9.44E-75  |
| TMEM198I  | ENSG00000 | 10.33 | 64.498  | -2.531 | 5.25E-91  |
| FUNDC2P2  | ENSG00000 | 0     | 60.93   | -5.953 | 1.93E-66  |
| RP11-181C | ENSG00000 | 1.7   | 11.11   | -2.165 | 4.86E-60  |
| GLUD2     | ENSG00000 | 1.71  | 19.821  | -2.942 | 1.08E-53  |
| TMEM95    | ENSG00000 | 0     | 13.21   | -3.829 | 8.69E-65  |
| WFDC10B   | ENSG00000 | 0.06  | 3.5     | -2.086 | 4.08E-48  |
| ODF3L1    | ENSG00000 | 0.09  | 30.149  | -4.837 | 6.87E-61  |
| OTOP2     | ENSG00000 | 0.02  | 5.61    | -2.696 | 9.74E-54  |
| SLC25A10  | ENSG00000 | 11.3  | 51.172  | -2.085 | 5.98E-39  |
| RGPD6     | ENSG00000 | 10.08 | 51.52   | -2.245 | 1.35E-61  |
| WBP2NL    | ENSG00000 | 0.46  | 110.913 | -6.26  | 1.31E-84  |
| GAS6      | ENSG00000 | 23.3  | 136.153 | -2.497 | 1.61E-54  |
| POM121L1  | ENSG00000 | 0     | 8.33    | -3.222 | 8.12E-55  |
| POTEC     | ENSG00000 | 0.03  | 7.44    | -3.035 | 3.37E-64  |
| WT1-AS    | ENSG00000 | 0.21  | 6.86    | -2.7   | 5.98E-82  |
| RIMBP3C   | ENSG00000 | 0.09  | 14.21   | -3.803 | 1.84E-47  |
| TISP43    | ENSG00000 | 0     | 13.22   | -3.83  | 5.28E-63  |
| FAM9A     | ENSG00000 | 0.05  | 5.51    | -2.632 | 1.01E-79  |
| EPHA10    | ENSG00000 | 1.34  | 41.619  | -4.187 | 2.20E-55  |
| SPDYE4    | ENSG00000 | 0     | 10.1    | -3.472 | 3.61E-71  |
| REC114    | ENSG00000 | 0.6   | 51.749  | -5.043 | 2.13E-66  |
| JRKL      | ENSG00000 | 2.4   | 15.48   | -2.277 | 8.89E-55  |
| TMEM89    | ENSG00000 | 0.1   | 30.92   | -4.859 | 1.69E-64  |



|           |           |        |         |        |           |
|-----------|-----------|--------|---------|--------|-----------|
| NPIPA1    | ENSG00000 | 54.511 | 251.863 | -2.188 | 7.39E-79  |
| TFDP3     | ENSG00000 | 0.16   | 5.33    | -2.448 | 3.08E-28  |
| RP11-958M | ENSG00000 | 3.39   | 20.29   | -2.278 | 1.40E-37  |
| MEX3B     | ENSG00000 | 4.43   | 61.991  | -3.536 | 3.15E-57  |
| FAM46C    | ENSG00000 | 6.77   | 52.109  | -2.773 | 3.66E-23  |
| PCBP3     | ENSG00000 | 2.86   | 27.57   | -2.888 | 1.22E-64  |
| GOLGA8G   | ENSG00000 | 0      | 37.509  | -5.267 | 5.02E-78  |
| TP53TG3   | ENSG00000 | 0.6    | 8.97    | -2.64  | 1.91E-46  |
| 11-Mar    | ENSG00000 | 0.47   | 130.119 | -6.479 | 3.00E-87  |
| OR4N4     | ENSG00000 | 0      | 7.71    | -3.123 | 1.21E-45  |
| TUBA8     | ENSG00000 | 0.98   | 67.578  | -5.114 | 4.34E-73  |
| NPIPA5    | ENSG00000 | 14.1   | 62.882  | -2.081 | 1.55E-26  |
| MAATS1    | ENSG00000 | 0.91   | 52.921  | -4.819 | 4.24E-91  |
| PNMA3     | ENSG00000 | 1.08   | 22.279  | -3.484 | 6.40E-67  |
| FAM3B     | ENSG00000 | 1.07   | 15.8    | -3.021 | 1.14E-29  |
| NPIPA5    | ENSG00000 | 74.682 | 308.686 | -2.033 | 1.53E-51  |
| PP2D1     | ENSG00000 | 0.1    | 16.97   | -4.03  | 5.60E-59  |
| TRIML1    | ENSG00000 | 0      | 16.979  | -4.168 | 2.87E-58  |
| RP13-103C | ENSG00000 | 0.05   | 20.129  | -4.331 | 2.29E-60  |
| RPL7AP28  | ENSG00000 | 0.14   | 9.02    | -3.136 | 1.23E-52  |
| SPRR4     | ENSG00000 | 0      | 7.54    | -3.094 | 1.73E-38  |
| LRTOMT    | ENSG00000 | 4.52   | 171.586 | -4.967 | 6.97E-82  |
| TSPYL2    | ENSG00000 | 20.8   | 256.532 | -3.562 | 7.00E-110 |
| GOLGA6L4  | ENSG00000 | 1.66   | 16.32   | -2.703 | 5.52E-91  |
| PGP       | ENSG00000 | 14.72  | 68.688  | -2.148 | 4.57E-52  |
| OLIG1     | ENSG00000 | 0.21   | 4.01    | -2.05  | 2.41E-41  |
| PRKD1     | ENSG00000 | 0.9    | 17.04   | -3.247 | 7.24E-57  |
| MROH7     | ENSG00000 | 0.44   | 126.027 | -6.463 | 6.66E-100 |
| IQCF2     | ENSG00000 | 0      | 113.59  | -6.84  | 2.02E-71  |
| SPATA32   | ENSG00000 | 0.06   | 65.471  | -5.971 | 3.55E-74  |
| PLA2G6    | ENSG00000 | 11.95  | 84.021  | -2.715 | 2.13E-62  |
| NUTM1     | ENSG00000 | 0.39   | 25.77   | -4.267 | 6.61E-68  |
| FAM19A3   | ENSG00000 | 0.52   | 10.2    | -2.881 | 3.12E-54  |
| PRSS55    | ENSG00000 | 0      | 39.281  | -5.332 | 2.07E-66  |
| ODF4      | ENSG00000 | 0      | 18.5    | -4.285 | 4.48E-71  |
| SERINC4   | ENSG00000 | 0.12   | 4.73    | -2.355 | 3.89E-96  |
| FAM110C   | ENSG00000 | 0.26   | 4.06    | -2.006 | 3.83E-55  |
| SMIM10    | ENSG00000 | 1.28   | 29.619  | -3.747 | 9.56E-70  |
| TCTE3     | ENSG00000 | 1.4    | 26.67   | -3.527 | 5.24E-83  |
| OSBP2     | ENSG00000 | 2.11   | 41.81   | -3.783 | 5.14E-47  |
| ZBTB7C    | ENSG00000 | 0.63   | 6.56    | -2.214 | 9.83E-62  |
| TCEAL2    | ENSG00000 | 1.69   | 52.98   | -4.327 | 2.44E-59  |
| LCN12     | ENSG00000 | 0.33   | 26.829  | -4.387 | 2.44E-95  |
| WT1       | ENSG00000 | 1      | 32.76   | -4.077 | 1.24E-90  |
| FAM227A   | ENSG00000 | 0.9    | 16.381  | -3.193 | 1.36E-63  |
| NT5C1B    | ENSG00000 | 0.16   | 51.371  | -5.497 | 1.91E-69  |
| MROH2A    | ENSG00000 | 0.06   | 6.38    | -2.8   | 2.96E-77  |
| FLRT2     | ENSG00000 | 2.64   | 14.28   | -2.07  | 1.86E-07  |
| MFSD6L    | ENSG00000 | 0.36   | 33.599  | -4.669 | 1.98E-53  |

|           |           |        |         |        |          |
|-----------|-----------|--------|---------|--------|----------|
| GOLGA8DF  | ENSG00000 | 0      | 11.63   | -3.659 | 3.16E-64 |
| LINC00313 | ENSG00000 | 0.25   | 4.95    | -2.251 | 2.64E-87 |
| NRBP2     | ENSG00000 | 7.02   | 34.84   | -2.16  | 7.07E-48 |
| MAGEA11   | ENSG00000 | 0.25   | 6.38    | -2.562 | 1.75E-61 |
| PPIL6     | ENSG00000 | 1.14   | 30.721  | -3.89  | 1.15E-68 |
| TEX33     | ENSG00000 | 0      | 123.956 | -6.965 | 4.92E-72 |
| NUPR1L    | ENSG00000 | 1.24   | 443.779 | -7.633 | 2.70E-69 |
| SPPL2C    | ENSG00000 | 0      | 48.65   | -5.634 | 2.47E-68 |
| RGPD2     | ENSG00000 | 6.36   | 29.09   | -2.031 | 7.65E-32 |
| PARK2     | ENSG00000 | 0.55   | 5.73    | -2.118 | 1.70E-76 |
| LINC00158 | ENSG00000 | 0.08   | 6.1     | -2.717 | 1.85E-54 |
| MUC1      | ENSG00000 | 2.57   | 72.821  | -4.37  | 2.32E-57 |
| LMNTD2    | ENSG00000 | 1.26   | 42.611  | -4.27  | 8.67E-77 |
| SPATA45   | ENSG00000 | 0.14   | 12.88   | -3.606 | 6.22E-57 |
| SPATA8    | ENSG00000 | 0.08   | 497.136 | -8.849 | 7.32E-91 |
| LMLN      | ENSG00000 | 2.01   | 14.67   | -2.38  | 2.34E-79 |
| SHC4      | ENSG00000 | 0.23   | 9.06    | -3.032 | 8.14E-90 |
| SMIM23    | ENSG00000 | 0      | 35.75   | -5.2   | 1.93E-62 |
| MORN5     | ENSG00000 | 0.16   | 111.538 | -6.6   | 7.61E-72 |
| EP400NL   | ENSG00000 | 6.48   | 69.859  | -3.244 | 6.03E-92 |
| WDR53     | ENSG00000 | 20.559 | 91.689  | -2.104 | 2.21E-30 |
| PCYT2     | ENSG00000 | 16.33  | 358.218 | -4.374 | 3.88E-63 |
| NAT8L     | ENSG00000 | 1.13   | 19.92   | -3.296 | 3.36E-73 |
| TMEM210   | ENSG00000 | 0.06   | 111.46  | -6.729 | 2.24E-76 |
| NPIP4     | ENSG00000 | 29.29  | 124.154 | -2.047 | 2.64E-31 |
| TRIM69    | ENSG00000 | 9.67   | 46.471  | -2.153 | 5.75E-36 |
| PRSS38    | ENSG00000 | 0      | 5.01    | -2.587 | 4.67E-68 |
| FAM186A   | ENSG00000 | 0.14   | 22.05   | -4.338 | 1.37E-58 |
| PLK5      | ENSG00000 | 0.58   | 9.16    | -2.685 | 3.06E-71 |
| LEMD1     | ENSG00000 | 1.52   | 111.136 | -5.476 | 4.22E-69 |
| ZPBP2     | ENSG00000 | 0.04   | 103.73  | -6.654 | 2.10E-93 |
| PIP5K1C   | ENSG00000 | 14.52  | 82.681  | -2.431 | 4.59E-63 |
| TEX38     | ENSG00000 | 0.21   | 522.142 | -8.756 | 9.72E-81 |
| PRR30     | ENSG00000 | 0      | 197.566 | -7.633 | 1.14E-75 |
| UBL4B     | ENSG00000 | 0.07   | 137.443 | -7.016 | 5.79E-75 |
| SLC51B    | ENSG00000 | 0.09   | 12.45   | -3.625 | 9.81E-67 |
| KDM4D     | ENSG00000 | 1.37   | 32.999  | -3.843 | 9.32E-62 |
| GPAT2     | ENSG00000 | 1.89   | 22.011  | -2.993 | 9.94E-50 |
| MST1P2    | ENSG00000 | 0.82   | 22.99   | -3.72  | 2.19E-77 |
| SLC36A3   | ENSG00000 | 0      | 7.5     | -3.087 | 2.01E-54 |
| LINC00643 | ENSG00000 | 0.08   | 41.489  | -5.298 | 3.35E-67 |
| GOLGA8R   | ENSG00000 | 0.42   | 9.56    | -2.895 | 1.24E-70 |
| TRDN      | ENSG00000 | 0.24   | 5.8     | -2.455 | 1.32E-41 |
| SPATA12   | ENSG00000 | 0.13   | 25.24   | -4.537 | 9.04E-63 |
| TMPRSS12  | ENSG00000 | 0      | 22.011  | -4.524 | 2.76E-72 |
| FAM228A   | ENSG00000 | 0.4    | 55.291  | -5.329 | 4.15E-91 |
| GNG2      | ENSG00000 | 11.04  | 153.553 | -3.682 | 1.00E-56 |
| MYT1L     | ENSG00000 | 0.16   | 6.63    | -2.718 | 1.25E-63 |
| ZNF396    | ENSG00000 | 0.92   | 6.94    | -2.048 | 9.31E-71 |

|           |           |       |         |        |          |
|-----------|-----------|-------|---------|--------|----------|
| SPATC1    | ENSG00000 | 0.15  | 50.73   | -5.491 | 1.55E-70 |
| KIF24     | ENSG00000 | 1.65  | 12.23   | -2.32  | 3.52E-52 |
| ZFP91     | ENSG00000 | 11.01 | 71.051  | -2.585 | 1.36E-64 |
| MST1L     | ENSG00000 | 1.9   | 26.07   | -3.223 | 1.28E-51 |
| MPPED1    | ENSG00000 | 0.09  | 7.21    | -2.913 | 6.84E-52 |
| SPATA31D  | ENSG00000 | 0     | 10.08   | -3.47  | 3.32E-66 |
| HYAL3     | ENSG00000 | 2.62  | 17.771  | -2.374 | 7.54E-46 |
| SELV      | ENSG00000 | 1.59  | 22.36   | -3.173 | 2.90E-42 |
| TRABD2A   | ENSG00000 | 2.3   | 59.301  | -4.192 | 2.36E-47 |
| MAPT      | ENSG00000 | 0.71  | 41.639  | -4.64  | 2.19E-47 |
| TMEM232   | ENSG00000 | 0.59  | 18.41   | -3.61  | 7.25E-76 |
| LINC01551 | ENSG00000 | 0     | 8.77    | -3.288 | 2.84E-61 |
| FAM183A   | ENSG00000 | 0.94  | 17.321  | -3.239 | 1.26E-35 |
| ESPN      | ENSG00000 | 4.87  | 198.335 | -5.086 | 7.64E-73 |
| TMPRSS6   | ENSG00000 | 0.25  | 9.9     | -3.124 | 4.63E-51 |
| TMEM262   | ENSG00000 | 0.4   | 28.789  | -4.411 | 1.40E-82 |
| PLCD1     | ENSG00000 | 10.02 | 76.85   | -2.821 | 3.01E-50 |
| HEATR4    | ENSG00000 | 0.31  | 15.41   | -3.647 | 2.20E-74 |
| LYPD6     | ENSG00000 | 0.68  | 7.58    | -2.353 | 1.69E-24 |
| SPATA21   | ENSG00000 | 0.05  | 12.41   | -3.675 | 4.86E-66 |
| H1FNT     | ENSG00000 | 0.06  | 284.818 | -8.075 | 9.89E-86 |
| RP11-195F | ENSG00000 | 4.96  | 332.819 | -5.808 | 8.50E-79 |
| ZNF546    | ENSG00000 | 1.13  | 17.06   | -3.084 | 1.49E-86 |
| HYPM      | ENSG00000 | 0.08  | 53.16   | -5.648 | 2.11E-66 |
| IFT140    | ENSG00000 | 4.73  | 43.081  | -2.944 | 6.45E-69 |
| POTEG     | ENSG00000 | 0.01  | 3.13    | -2.032 | 1.36E-57 |
| ZNF385C   | ENSG00000 | 1.81  | 22.139  | -3.042 | 1.39E-64 |
| TMEM247   | ENSG00000 | 0.57  | 65.748  | -5.41  | 1.15E-62 |
| RGPD1     | ENSG00000 | 10.69 | 66.879  | -2.538 | 2.85E-31 |
| KRT18P59  | ENSG00000 | 0.03  | 4.84    | -2.503 | 1.00E-70 |
| RP11-723C | ENSG00000 | 0.18  | 5.92    | -2.552 | 2.06E-53 |
| FAM69C    | ENSG00000 | 0.16  | 7.13    | -2.809 | 1.62E-44 |
| TMEM72    | ENSG00000 | 0.03  | 3.76    | -2.208 | 4.72E-38 |
| FAM205C   | ENSG00000 | 0     | 34.539  | -5.151 | 3.97E-66 |
| TMEM202   | ENSG00000 | 0     | 25.06   | -4.704 | 2.50E-59 |
| RP11-24M  | ENSG00000 | 0     | 6.06    | -2.82  | 4.67E-54 |
| TMEM220   | ENSG00000 | 5.56  | 32.86   | -2.368 | 9.18E-55 |
| LRRC74B   | ENSG00000 | 0.08  | 14.95   | -3.884 | 8.53E-78 |
| LCN10     | ENSG00000 | 0.96  | 10.63   | -2.569 | 8.91E-44 |
| ZCCHC13   | ENSG00000 | 0.04  | 28.201  | -4.811 | 2.03E-60 |
| TPRG1     | ENSG00000 | 1.06  | 9.82    | -2.393 | 1.90E-82 |
| RP11-43F1 | ENSG00000 | 2.63  | 19.32   | -2.485 | 5.43E-61 |
| MORN2     | ENSG00000 | 15.46 | 223.417 | -3.769 | 4.71E-59 |
| RNF133    | ENSG00000 | 0.02  | 55.572  | -5.793 | 3.01E-72 |
| TMEM215   | ENSG00000 | 0.12  | 4.56    | -2.312 | 8.24E-45 |
| FAM166A   | ENSG00000 | 0.18  | 84.858  | -6.185 | 3.61E-87 |
| LINC00265 | ENSG00000 | 5.19  | 50.181  | -3.048 | 1.07E-56 |
| FAM230A   | ENSG00000 | 0     | 9.05    | -3.329 | 6.34E-59 |
| LRRIQ4    | ENSG00000 | 0.04  | 3.43    | -2.091 | 3.58E-45 |

|           |           |        |         |        |          |
|-----------|-----------|--------|---------|--------|----------|
| FAM92A1   | ENSG00000 | 29.769 | 157.204 | -2.362 | 2.76E-47 |
| PRR19     | ENSG00000 | 5.14   | 29.171  | -2.297 | 6.60E-38 |
| H3F3C     | ENSG00000 | 0.2    | 26.999  | -4.544 | 1.32E-68 |
| PPP3R2    | ENSG00000 | 0.01   | 47.029  | -5.571 | 1.04E-75 |
| GOLGA6L3  | ENSG00000 | 0.08   | 11.82   | -3.569 | 1.61E-81 |
| NANOS2    | ENSG00000 | 0.06   | 4.57    | -2.394 | 4.54E-68 |
| SERPINA5  | ENSG00000 | 7.31   | 416.363 | -5.65  | 1.18E-72 |
| KRTDAP    | ENSG00000 | 0.07   | 14.27   | -3.835 | 1.72E-36 |
| HBA2      | ENSG00000 | 11.21  | 67.102  | -2.48  | 8.60E-04 |
| PAQR9     | ENSG00000 | 0.14   | 26.09   | -4.571 | 6.32E-58 |
| GOLGA8M   | ENSG00000 | 0.2    | 8.09    | -2.921 | 1.21E-71 |
| SAXO2     | ENSG00000 | 1.76   | 32.54   | -3.603 | 1.22E-65 |
| HILS1     | ENSG00000 | 0.09   | 25.479  | -4.602 | 2.39E-68 |
| TEKT4P2   | ENSG00000 | 2.33   | 12.59   | -2.029 | 2.24E-29 |
| SLC4A5    | ENSG00000 | 1.18   | 14.61   | -2.84  | 2.46E-66 |
| FSIP2     | ENSG00000 | 0.32   | 25.871  | -4.347 | 9.80E-71 |
| TBC1D3P2  | ENSG00000 | 0.02   | 14.35   | -3.912 | 1.64E-69 |
| TMCO2     | ENSG00000 | 0      | 158.034 | -7.313 | 1.92E-76 |
| ZDHHC11   | ENSG00000 | 3.22   | 28.041  | -2.783 | 6.70E-56 |
| ZNF563    | ENSG00000 | 1.98   | 15.26   | -2.448 | 2.93E-70 |
| FBF1      | ENSG00000 | 6.77   | 60.572  | -2.986 | 3.06E-85 |
| USP32P1   | ENSG00000 | 15.95  | 132.357 | -2.976 | 8.72E-34 |
| UTS2B     | ENSG00000 | 0.24   | 5.28    | -2.34  | 9.29E-41 |
| MSANTD1   | ENSG00000 | 0.27   | 4.71    | -2.169 | 2.47E-71 |
| RNFT1     | ENSG00000 | 6.84   | 58.048  | -2.913 | 1.30E-68 |
| GAGE2A    | ENSG00000 | 0.61   | 62.53   | -5.302 | 1.19E-59 |
| TMEM120   | ENSG00000 | 35.231 | 252.387 | -2.806 | 7.79E-89 |
| PLAC9     | ENSG00000 | 3.35   | 19.16   | -2.212 | 1.92E-09 |
| FAM47B    | ENSG00000 | 0      | 11.95   | -3.695 | 4.68E-66 |
| NKAPL     | ENSG00000 | 0.49   | 39.01   | -4.747 | 1.00E-94 |
| UBE2Q2P1  | ENSG00000 | 1.44   | 10.79   | -2.273 | 6.91E-50 |
| FSCB      | ENSG00000 | 0.01   | 39.871  | -5.339 | 6.98E-63 |
| FAM47E    | ENSG00000 | 0.84   | 12.56   | -2.882 | 5.04E-73 |
| LINC00943 | ENSG00000 | 0.03   | 84.87   | -6.381 | 2.60E-73 |
| SPANXN3   | ENSG00000 | 0      | 55.291  | -5.815 | 3.75E-79 |
| FAM150B   | ENSG00000 | 1.3    | 40.571  | -4.176 | 9.87E-96 |
| SPANXN4   | ENSG00000 | 0      | 28.22   | -4.869 | 7.05E-67 |
| RP11-113C | ENSG00000 | 0      | 19.66   | -4.369 | 1.16E-70 |
| FAM179A   | ENSG00000 | 1.03   | 7.55    | -2.074 | 1.76E-34 |
| SPATA31D  | ENSG00000 | 0      | 6.71    | -2.947 | 1.16E-51 |
| KIAA0408  | ENSG00000 | 0.37   | 5.22    | -2.183 | 1.78E-43 |
| TBC1D28   | ENSG00000 | 0      | 32.701  | -5.075 | 2.95E-71 |
| OTUD6A    | ENSG00000 | 0.21   | 5.13    | -2.341 | 3.15E-16 |
| MMP23B    | ENSG00000 | 3.7    | 20.53   | -2.196 | 2.76E-21 |
| SPATA41   | ENSG00000 | 0.25   | 6.96    | -2.671 | 3.96E-87 |
| USP32P3   | ENSG00000 | 4.65   | 60.501  | -3.444 | 2.20E-31 |
| SYCP2     | ENSG00000 | 1.75   | 40.461  | -3.914 | 1.53E-58 |
| MYBPC1    | ENSG00000 | 0.07   | 6.81    | -2.868 | 2.71E-58 |
| KIAA0895L | ENSG00000 | 11.3   | 65.689  | -2.439 | 3.44E-78 |

|           |           |       |         |        |          |
|-----------|-----------|-------|---------|--------|----------|
| VN1R2     | ENSG00000 | 0.02  | 4.06    | -2.311 | 8.78E-44 |
| PLEKHG4   | ENSG00000 | 12.63 | 97.423  | -2.852 | 7.88E-43 |
| STK40     | ENSG00000 | 16.45 | 73.449  | -2.093 | 7.42E-77 |
| OR10J1    | ENSG00000 | 0     | 8.5     | -3.248 | 3.89E-47 |
| SRGAP3    | ENSG00000 | 1.14  | 10.56   | -2.433 | 4.89E-57 |
| RP11-497F | ENSG00000 | 1.07  | 10.64   | -2.491 | 9.95E-27 |
| ZBTB44    | ENSG00000 | 8.83  | 44.359  | -2.206 | 4.74E-57 |
| STK31     | ENSG00000 | 2.75  | 60.77   | -4.042 | 8.96E-55 |
| NLGN3     | ENSG00000 | 0.3   | 5.41    | -2.302 | 1.46E-39 |
| ZNF781    | ENSG00000 | 2.75  | 15.51   | -2.138 | 2.40E-33 |
| INCA1     | ENSG00000 | 1.58  | 65.181  | -4.681 | 2.75E-91 |
| SPANXD    | ENSG00000 | 0.04  | 26.8    | -4.74  | 2.95E-62 |
| NOXO1     | ENSG00000 | 0.48  | 7.55    | -2.53  | 1.84E-67 |
| NBPF4     | ENSG00000 | 0.02  | 4.01    | -2.296 | 1.11E-62 |
| NPIP15    | ENSG00000 | 3.74  | 74.227  | -3.988 | 2.76E-54 |
| GK2       | ENSG00000 | 0.01  | 75.583  | -6.245 | 9.85E-80 |
| TCEAL3    | ENSG00000 | 7.17  | 43.099  | -2.432 | 2.26E-30 |
| LINC00238 | ENSG00000 | 0     | 107.761 | -6.765 | 1.02E-70 |
| PFN3      | ENSG00000 | 0.08  | 30.93   | -4.886 | 3.17E-61 |
| ZNF846    | ENSG00000 | 3.34  | 46.649  | -3.457 | 1.52E-96 |
| PDXDC2P   | ENSG00000 | 5.49  | 33.62   | -2.415 | 8.21E-60 |
| TOMM20L   | ENSG00000 | 0.06  | 17.8    | -4.149 | 1.18E-69 |
| RGPD4     | ENSG00000 | 0.01  | 4.42    | -2.424 | 3.09E-68 |
| KIAA1211L | ENSG00000 | 1.12  | 10.18   | -2.399 | 1.42E-63 |
| TEX43     | ENSG00000 | 0     | 27.249  | -4.82  | 2.47E-66 |
| KPNA5     | ENSG00000 | 2.35  | 43.09   | -3.718 | 1.84E-72 |
| SCOC-AS1  | ENSG00000 | 1.47  | 14.03   | -2.605 | 5.24E-63 |
| SMIM10L2  | ENSG00000 | 0.49  | 7.01    | -2.426 | 1.52E-55 |
| NPIP9     | ENSG00000 | 0.93  | 19.92   | -3.438 | 1.18E-79 |
| RP11-573C | ENSG00000 | 0.58  | 7.62    | -2.448 | 1.36E-28 |
| LRRC8B    | ENSG00000 | 1.23  | 11.41   | -2.476 | 2.18E-49 |
| NEK5      | ENSG00000 | 0.92  | 10.7    | -2.607 | 5.72E-40 |
| MAGEA6    | ENSG00000 | 0.09  | 9.65    | -3.288 | 6.32E-38 |
| PIWIL2    | ENSG00000 | 4.21  | 21.021  | -2.079 | 1.11E-19 |
| NOL4L     | ENSG00000 | 14.77 | 71.13   | -2.193 | 5.03E-42 |
| KB-1592A4 | ENSG00000 | 0.02  | 91.088  | -6.496 | 2.01E-83 |
| TPSB2     | ENSG00000 | 0.25  | 8.83    | -2.975 | 7.14E-22 |
| ZNF165    | ENSG00000 | 2.2   | 21.299  | -2.801 | 2.25E-44 |
| VEPH1     | ENSG00000 | 0.17  | 9.61    | -3.181 | 2.42E-34 |
| FABP12    | ENSG00000 | 0     | 6.67    | -2.939 | 2.11E-45 |
| GGT3P     | ENSG00000 | 0.12  | 3.85    | -2.114 | 5.14E-57 |
| ZNF628    | ENSG00000 | 5.45  | 31.71   | -2.342 | 7.35E-45 |
| LINC00477 | ENSG00000 | 0     | 3.13    | -2.046 | 2.66E-64 |
| TTC30A    | ENSG00000 | 0.72  | 8.9     | -2.525 | 2.63E-64 |
| SSPO      | ENSG00000 | 0.12  | 4.55    | -2.309 | 3.11E-64 |
| ZNF433    | ENSG00000 | 2.61  | 32.919  | -3.232 | 1.77E-75 |
| TXNRD3    | ENSG00000 | 4.66  | 39.029  | -2.822 | 1.64E-73 |
| KLHDC1    | ENSG00000 | 0.34  | 4.76    | -2.104 | 2.05E-72 |
| RP1-253P7 | ENSG00000 | 0.13  | 5.34    | -2.488 | 2.48E-79 |

|           |           |          |          |        |          |
|-----------|-----------|----------|----------|--------|----------|
| FAM212B   | ENSG00000 | 1.34     | 10.17    | -2.255 | 6.77E-57 |
| ZNF790    | ENSG00000 | 2.14     | 13.38    | -2.195 | 1.64E-51 |
| MEIG1     | ENSG00000 | 0.62     | 19.35    | -3.651 | 7.31E-71 |
| LEKR1     | ENSG00000 | 0.16     | 13.32    | -3.626 | 1.73E-84 |
| KEL       | ENSG00000 | 1.46     | 76.468   | -4.977 | 1.01E-72 |
| SPANXA1   | ENSG00000 | 1.29     | 22.15    | -3.338 | 1.13E-27 |
| TUBA3C    | ENSG00000 | 0.13     | 532.411  | -8.883 | 5.45E-83 |
| NUP62CL   | ENSG00000 | 0.83     | 11.63    | -2.787 | 2.23E-50 |
| MB        | ENSG00000 | 0.47     | 4.95     | -2.017 | 9.73E-25 |
| NPIP6     | ENSG00000 | 0.87     | 53.101   | -4.855 | 4.40E-78 |
| HMG5      | ENSG00000 | 8.52     | 103.852  | -3.461 | 8.18E-60 |
| SVIP      | ENSG00000 | 7.82     | 75.829   | -3.123 | 1.49E-76 |
| FAM47C    | ENSG00000 | 0.03     | 3.8      | -2.22  | 1.05E-55 |
| RPS6KL1   | ENSG00000 | 4.89     | 26.521   | -2.224 | 2.66E-59 |
| TUBB3     | ENSG00000 | 0.09     | 19.721   | -4.249 | 6.63E-75 |
| RP11-98J2 | ENSG00000 | 1.51     | 17.99    | -2.919 | 5.17E-56 |
| TMEM116   | ENSG00000 | 7.27     | 33.139   | -2.045 | 8.79E-57 |
| NUP210P1  | ENSG00000 | 0        | 7.16     | -3.029 | 5.26E-51 |
| TMEM239   | ENSG00000 | 0        | 137.319  | -7.112 | 1.80E-74 |
| MYL4      | ENSG00000 | 0.91     | 19.849   | -3.448 | 2.49E-27 |
| PLN       | ENSG00000 | 0.34     | 5.31     | -2.235 | 8.34E-31 |
| RP11-598C | ENSG00000 | 0.2      | 9.38     | -3.113 | 2.34E-69 |
| SPANXC    | ENSG00000 | 0        | 25.41    | -4.723 | 1.07E-47 |
| FAM19A2   | ENSG00000 | 1.18     | 18.45    | -3.157 | 8.86E-71 |
| MAGEA1    | ENSG00000 | 0.06     | 5.78     | -2.677 | 1.53E-47 |
| SMOC1     | ENSG00000 | 3.31     | 44.749   | -3.408 | 2.59E-56 |
| LRR3      | ENSG00000 | 0.02     | 15.2     | -3.989 | 5.10E-78 |
| PLXNB3    | ENSG00000 | 0.39     | 27.651   | -4.365 | 7.93E-58 |
| OXCT2     | ENSG00000 | 0.47     | 93.72    | -6.01  | 5.85E-76 |
| EPS8L3    | ENSG00000 | 0.09     | 9.1      | -3.212 | 1.16E-35 |
| SYCP1     | ENSG00000 | 0.13     | 44.479   | -5.331 | 1.63E-93 |
| MAGEB3    | ENSG00000 | 0.17     | 5.28     | -2.424 | 1.10E-69 |
| STKLD1    | ENSG00000 | 1.36     | 25.77    | -3.504 | 1.25E-68 |
| PNMA5     | ENSG00000 | 1.42     | 11.12    | -2.324 | 1.88E-12 |
| ITPR1L1   | ENSG00000 | 2.47     | 35.631   | -3.4   | 9.91E-43 |
| MT-ND1    | ENSG00000 | 2644.904 | 15412.36 | -2.542 | 2.10E-43 |
| SHISA4    | ENSG00000 | 4.14     | 23.92    | -2.277 | 2.91E-37 |
| KIAA0753  | ENSG00000 | 5.14     | 29.37    | -2.306 | 4.88E-49 |
| MFAP3L    | ENSG00000 | 2.28     | 71.218   | -4.461 | 6.58E-64 |
| RNU5B-1   | ENSG00000 | 0        | 14.32    | -3.937 | 8.38E-14 |
| SNORD118  | ENSG00000 | 0        | 5.62     | -2.727 | 1.63E-07 |
| RNU4-1    | ENSG00000 | 2.93     | 14.95    | -2.021 | 6.49E-12 |
| SNORA73   | ENSG00000 | 0        | 3.25     | -2.087 | 6.32E-39 |
| RN7SK     | ENSG00000 | 14.29    | 71.002   | -2.235 | 7.87E-29 |
| RN7SKP23C | ENSG00000 | 0        | 3.43     | -2.147 | 5.75E-49 |
| RP11-98D1 | ENSG00000 | 0.78     | 6.89     | -2.148 | 1.24E-43 |
| FAM83H-1  | ENSG00000 | 1.63     | 11.57    | -2.257 | 7.66E-36 |
| IBA57-AS1 | ENSG00000 | 0.18     | 25.801   | -4.505 | 4.02E-85 |
| TCP10     | ENSG00000 | 0        | 28.14    | -4.865 | 2.53E-81 |

|           |           |        |          |         |           |
|-----------|-----------|--------|----------|---------|-----------|
| MSTO2P    | ENSG00000 | 1.95   | 15.519   | -2.485  | 7.46E-56  |
| FAM229B   | ENSG00000 | 15.55  | 586.789  | -5.15   | 2.23E-71  |
| FANK1     | ENSG00000 | 2.08   | 104.133  | -5.093  | 5.74E-79  |
| PRR9      | ENSG00000 | 0.02   | 3.43     | -2.119  | 5.36E-24  |
| LELP1     | ENSG00000 | 0.06   | 1406.408 | -10.375 | 1.80E-79  |
| FAM24A    | ENSG00000 | 0      | 21.18    | -4.471  | 1.33E-62  |
| PPAPDC1A  | ENSG00000 | 1.45   | 10.93    | -2.284  | 6.54E-39  |
| HIST2H2A  | ENSG00000 | 33.831 | 198.775  | -2.52   | 2.71E-42  |
| SPATA42   | ENSG00000 | 0      | 353.654  | -8.47   | 9.40E-75  |
| SPANXA2   | ENSG00000 | 0.24   | 15.3     | -3.717  | 3.53E-36  |
| SAMD13    | ENSG00000 | 1.4    | 12.15    | -2.454  | 2.52E-65  |
| RP11-188C | ENSG00000 | 0.04   | 8.54     | -3.197  | 1.60E-58  |
| RHOXF2B   | ENSG00000 | 0.08   | 16.89    | -4.05   | 1.11E-23  |
| LIPJ      | ENSG00000 | 0.02   | 5.53     | -2.678  | 1.49E-55  |
| TRPC5OS   | ENSG00000 | 0.06   | 15.72    | -3.979  | 1.44E-96  |
| LRRC73    | ENSG00000 | 0.29   | 60.522   | -5.576  | 1.74E-82  |
| TCEAL5    | ENSG00000 | 1.26   | 73.231   | -5.038  | 1.37E-61  |
| TCEAL6    | ENSG00000 | 0.04   | 33.831   | -5.066  | 2.16E-94  |
| TDRG1     | ENSG00000 | 0.21   | 112.938  | -6.557  | 4.74E-91  |
| TRAF3IP1  | ENSG00000 | 4.09   | 43.549   | -3.13   | 2.51E-66  |
| GIGYF2    | ENSG00000 | 16.72  | 72.7     | -2.056  | 6.39E-52  |
| PTPN20    | ENSG00000 | 0.73   | 12.21    | -2.933  | 6.20E-87  |
| GGNBP1    | ENSG00000 | 0.1    | 5.99     | -2.668  | 1.04E-57  |
| TXNDC8    | ENSG00000 | 0      | 26.64    | -4.789  | 1.54E-68  |
| PAGE3     | ENSG00000 | 0      | 9.81     | -3.434  | 1.03E-74  |
| TMEM225   | ENSG00000 | 0      | 15.49    | -4.044  | 5.11E-63  |
| ERICH2    | ENSG00000 | 2.17   | 222.443  | -6.139  | 1.18E-63  |
| SPANXN5   | ENSG00000 | 0      | 17.64    | -4.22   | 1.17E-64  |
| XAGE1A    | ENSG00000 | 7.16   | 39.349   | -2.306  | 4.62E-06  |
| XAGE1B    | ENSG00000 | 3.49   | 53.731   | -3.608  | 1.02E-13  |
| HSPA1L    | ENSG00000 | 1.5    | 82.968   | -5.07   | 1.34E-66  |
| MSH5      | ENSG00000 | 8.48   | 59.991   | -2.686  | 8.41E-72  |
| LY6G5C    | ENSG00000 | 2.46   | 26.8     | -3.006  | 6.55E-65  |
| PSORS1C1  | ENSG00000 | 1.46   | 136.692  | -5.807  | 5.78E-95  |
| LINC01552 | ENSG00000 | 0.05   | 13.42    | -3.78   | 2.47E-79  |
| TRIM31    | ENSG00000 | 0.39   | 5.6      | -2.247  | 1.38E-47  |
| ZNRD1-AS  | ENSG00000 | 1.85   | 32.199   | -3.542  | 2.85E-72  |
| RPS26P8   | ENSG00000 | 0.28   | 14       | -3.551  | 7.74E-58  |
| FAM153C   | ENSG00000 | 0.53   | 154.075  | -6.663  | 1.74E-138 |
| OR2H1     | ENSG00000 | 0      | 19.149   | -4.333  | 1.21E-69  |
| MAMDC2-   | ENSG00000 | 0.11   | 6.06     | -2.669  | 1.06E-101 |
| RANBP17   | ENSG00000 | 2.68   | 21.9     | -2.638  | 1.73E-70  |
| TTC25     | ENSG00000 | 2.22   | 58.282   | -4.202  | 7.49E-56  |
| SPATA31A  | ENSG00000 | 0.15   | 10.76    | -3.354  | 1.24E-59  |
| FAM216A   | ENSG00000 | 11.27  | 57.181   | -2.245  | 3.33E-50  |
| FAM201A   | ENSG00000 | 0.14   | 3.92     | -2.11   | 4.32E-73  |
| IGFL2     | ENSG00000 | 0.83   | 9.44     | -2.512  | 1.15E-40  |
| RP6-99M1  | ENSG00000 | 0      | 5.21     | -2.635  | 2.95E-52  |
| FAM221B   | ENSG00000 | 0.02   | 19.231   | -4.31   | 2.78E-69  |

|           |           |       |         |        |          |
|-----------|-----------|-------|---------|--------|----------|
| LRRC10B   | ENSG00000 | 0.71  | 6.87    | -2.202 | 2.93E-40 |
| TRIM13    | ENSG00000 | 21.04 | 93.87   | -2.106 | 7.47E-40 |
| MS4A13    | ENSG00000 | 0     | 4.4     | -2.433 | 1.93E-48 |
| PRSS1     | ENSG00000 | 0.05  | 5.54    | -2.639 | 1.67E-13 |
| SYCE1L    | ENSG00000 | 1.69  | 31.13   | -3.578 | 2.35E-61 |
| FAM71F2   | ENSG00000 | 0.66  | 35.68   | -4.466 | 2.52E-65 |
| FAM205A   | ENSG00000 | 0     | 30.01   | -4.955 | 2.95E-68 |
| LINC00654 | ENSG00000 | 0.57  | 17.321  | -3.545 | 1.64E-77 |
| KRT17P7   | ENSG00000 | 0.04  | 20.841  | -4.392 | 2.25E-79 |
| TTLL10-AS | ENSG00000 | 0.04  | 4.52    | -2.408 | 7.25E-50 |
| SPDYE2    | ENSG00000 | 1.12  | 12.85   | -2.708 | 1.72E-49 |
| KRT17P5   | ENSG00000 | 0.04  | 28.949  | -4.848 | 1.88E-89 |
| MGAT4D    | ENSG00000 | 0     | 19      | -4.322 | 5.74E-70 |
| KRT17P4   | ENSG00000 | 0.14  | 21.66   | -4.313 | 1.46E-76 |
| SLCO6A1   | ENSG00000 | 0.05  | 39.829  | -5.281 | 1.05E-80 |
| LINC00661 | ENSG00000 | 0.06  | 66.661  | -5.996 | 9.25E-84 |
| IZUMO3    | ENSG00000 | 0     | 16.79   | -4.153 | 2.78E-59 |
| RP11-812E | ENSG00000 | 0     | 4.61    | -2.488 | 5.39E-69 |
| TP53TG3D  | ENSG00000 | 0.92  | 19.929  | -3.446 | 4.26E-71 |
| TP53TG3C  | ENSG00000 | 0.22  | 7.56    | -2.811 | 3.19E-53 |
| SERF1B    | ENSG00000 | 42.2  | 221.367 | -2.364 | 4.87E-51 |
| STAG3L1   | ENSG00000 | 2.37  | 27.88   | -3.099 | 5.05E-92 |
| MUC19     | ENSG00000 | 0.49  | 67.822  | -5.529 | 6.15E-73 |
| VCX3B     | ENSG00000 | 0.8   | 82.738  | -5.54  | 5.14E-54 |
| FAM183DF  | ENSG00000 | 0     | 5.77    | -2.759 | 9.15E-57 |
| RP11-1212 | ENSG00000 | 10.87 | 57.871  | -2.31  | 1.11E-34 |
| GAGE1     | ENSG00000 | 0.45  | 53.4    | -5.229 | 1.53E-46 |
| LINC01531 | ENSG00000 | 0     | 6.18    | -2.844 | 1.40E-48 |
| TTC23L    | ENSG00000 | 0.21  | 40.31   | -5.093 | 1.91E-86 |
| RFPL3S    | ENSG00000 | 3.17  | 109.068 | -4.722 | 6.57E-59 |
| LRRC72    | ENSG00000 | 0     | 6.06    | -2.82  | 5.88E-53 |
| SRRM2-AS  | ENSG00000 | 0.53  | 25.91   | -4.137 | 8.90E-83 |
| RP11-404K | ENSG00000 | 0     | 83.8    | -6.406 | 7.00E-74 |
| SMIM21    | ENSG00000 | 0     | 3.13    | -2.046 | 4.56E-66 |
| ZDHC11E   | ENSG00000 | 0.6   | 7.9     | -2.476 | 3.89E-57 |
| RP11-503M | ENSG00000 | 0.11  | 19.34   | -4.196 | 7.40E-82 |
| GOLGA8O   | ENSG00000 | 0.05  | 8.41    | -3.164 | 9.24E-68 |
| TMEM191C  | ENSG00000 | 2.95  | 151.628 | -5.272 | 3.35E-65 |
| KB-1183D  | ENSG00000 | 0     | 27.49   | -4.832 | 3.93E-70 |
| HBA1      | ENSG00000 | 6.76  | 39.21   | -2.373 | 1.46E-06 |
| TCEB3B    | ENSG00000 | 0     | 5.19    | -2.63  | 2.33E-58 |
| TSSK2     | ENSG00000 | 0     | 169.353 | -7.412 | 5.70E-74 |
| RP11-93O  | ENSG00000 | 0     | 4.76    | -2.526 | 8.68E-55 |
| RP11-553A | ENSG00000 | 0.42  | 6.6     | -2.42  | 1.04E-65 |
| LNP1      | ENSG00000 | 2.12  | 23.131  | -2.951 | 2.22E-48 |
| PRSS50    | ENSG00000 | 1.56  | 71.908  | -4.832 | 3.98E-71 |
| KRBOX1-A  | ENSG00000 | 0     | 3.17    | -2.06  | 2.05E-65 |
| ZCWPW2    | ENSG00000 | 0.63  | 10.06   | -2.762 | 4.79E-65 |
| RNU1-28P  | ENSG00000 | 4.86  | 44.2    | -2.947 | 1.13E-33 |



|           |           |         |          |        |           |
|-----------|-----------|---------|----------|--------|-----------|
| RNU1-27P  | ENSG00000 | 4.86    | 44.301   | -2.951 | 1.70E-36  |
| RNU1-1    | ENSG00000 | 4.86    | 44.2     | -2.947 | 1.13E-33  |
| RNVU1-18  | ENSG00000 | 4.86    | 44.2     | -2.947 | 1.13E-33  |
| RNU1-2    | ENSG00000 | 4.86    | 44.301   | -2.951 | 1.70E-36  |
| RNU1-4    | ENSG00000 | 4.86    | 44.301   | -2.951 | 1.70E-36  |
| RNU1-3    | ENSG00000 | 4.86    | 44.2     | -2.947 | 1.13E-33  |
| MT-RNR2   | ENSG00000 | 1962.53 | 9678.044 | -2.301 | 1.70E-34  |
| KB-1572G7 | ENSG00000 | 0.13    | 10.67    | -3.368 | 9.46E-64  |
| TRBV7-1   | ENSG00000 | 0       | 9.55     | -3.399 | 1.06E-53  |
| TSSK1B    | ENSG00000 | 0.02    | 68.659   | -6.094 | 1.12E-69  |
| PRR22     | ENSG00000 | 7.16    | 66.32    | -3.044 | 1.97E-44  |
| SNORA57   | ENSG00000 | 0       | 17.49    | -4.209 | 1.74E-24  |
| EWSAT1    | ENSG00000 | 0.16    | 19.02    | -4.109 | 1.60E-67  |
| RPL29P7   | ENSG00000 | 0       | 12.15    | -3.717 | 1.76E-56  |
| FGFR1OP   | ENSG00000 | 12.3    | 69.772   | -2.412 | 9.72E-54  |
| RP11-760I | ENSG00000 | 0.03    | 3.5      | -2.127 | 6.96E-52  |
| RPL36AP4E | ENSG00000 | 0       | 5.42     | -2.683 | 2.65E-62  |
| FAM24B    | ENSG00000 | 2.41    | 13.1     | -2.048 | 3.63E-66  |
| C6orf165  | ENSG00000 | 0.24    | 20.35    | -4.106 | 1.12E-59  |
| PPP1R2P1C | ENSG00000 | 0.55    | 5.42     | -2.05  | 6.15E-45  |
| TSGA13    | ENSG00000 | 0       | 17.95    | -4.244 | 2.97E-66  |
| GSTM2     | ENSG00000 | 18.39   | 138.418  | -2.846 | 3.89E-40  |
| MAGEA12   | ENSG00000 | 0.06    | 3.66     | -2.136 | 2.26E-27  |
| RPLP1P6   | ENSG00000 | 1       | 14.3     | -2.935 | 9.13E-83  |
| YBX2P1    | ENSG00000 | 0       | 6.17     | -2.842 | 7.26E-71  |
| TTLL13P   | ENSG00000 | 0.15    | 18.75    | -4.102 | 9.20E-73  |
| RP13-39P1 | ENSG00000 | 0.38    | 8.8      | -2.828 | 3.33E-62  |
| VN1R64P   | ENSG00000 | 0       | 3.45     | -2.154 | 3.83E-59  |
| SLC25A1P3 | ENSG00000 | 0.04    | 13.88    | -3.839 | 3.36E-69  |
| FAM209B   | ENSG00000 | 0.41    | 147.298  | -6.717 | 1.14E-77  |
| TTLL3     | ENSG00000 | 11.16   | 134.13   | -3.474 | 4.17E-76  |
| UCA1      | ENSG00000 | 0.05    | 3.84     | -2.205 | 9.18E-25  |
| ST7-OT4   | ENSG00000 | 0.06    | 21.98    | -4.438 | 4.68E-88  |
| TTC41P    | ENSG00000 | 0.62    | 7.68     | -2.422 | 3.33E-64  |
| LCNL1     | ENSG00000 | 0.24    | 58.141   | -5.576 | 1.53E-115 |
| LRRC37A4F | ENSG00000 | 3.62    | 42.209   | -3.225 | 2.16E-23  |
| FAM187A   | ENSG00000 | 0.62    | 20.68    | -3.742 | 1.27E-58  |
| PLIN5     | ENSG00000 | 0.38    | 4.54     | -2.005 | 6.31E-50  |
| SEC14L6   | ENSG00000 | 0.38    | 6.68     | -2.476 | 1.23E-66  |
| STARD10   | ENSG00000 | 27.42   | 387.216  | -3.772 | 5.59E-52  |
| LRRC37A11 | ENSG00000 | 0.1     | 4.55     | -2.335 | 2.49E-55  |
| RP11-74E2 | ENSG00000 | 0.02    | 7.3      | -3.025 | 1.29E-67  |
| RP11-989E | ENSG00000 | 0       | 8.19     | -3.2   | 5.21E-75  |
| SLC6A10P  | ENSG00000 | 1.07    | 66.8     | -5.034 | 1.94E-70  |
| RP11-83B2 | ENSG00000 | 0.03    | 4.24     | -2.347 | 3.52E-66  |
| ZSWIM8    | ENSG00000 | 35.05   | 205.044  | -2.515 | 3.38E-75  |
| IQCF5     | ENSG00000 | 0.26    | 135.889  | -6.763 | 3.83E-62  |
| IQCF6     | ENSG00000 | 0       | 24.401   | -4.667 | 8.63E-62  |
| RP1-139D8 | ENSG00000 | 0       | 155.19   | -7.287 | 2.07E-73  |

|           |           |       |         |        |           |
|-----------|-----------|-------|---------|--------|-----------|
| RP11-429J | ENSG00000 | 0.23  | 9.99    | -3.159 | 8.38E-79  |
| HNRNPA1F  | ENSG00000 | 0.03  | 40.461  | -5.331 | 2.26E-66  |
| LINC01347 | ENSG00000 | 1.86  | 22.969  | -3.067 | 3.09E-46  |
| RAD51AP2  | ENSG00000 | 0.09  | 7.69    | -2.995 | 6.78E-75  |
| U82695.5  | ENSG00000 | 0.04  | 16.34   | -4.059 | 2.39E-88  |
| SPATA31D  | ENSG00000 | 0.03  | 14.84   | -3.943 | 2.99E-79  |
| NPIPA8    | ENSG00000 | 1.95  | 17.95   | -2.683 | 2.20E-19  |
| TBC1D26   | ENSG00000 | 0.09  | 12.15   | -3.593 | 3.34E-77  |
| FAM74A1   | ENSG00000 | 0     | 4.84    | -2.546 | 4.44E-36  |
| LINC00588 | ENSG00000 | 0     | 3.52    | -2.176 | 7.36E-58  |
| RP11-102E | ENSG00000 | 0.03  | 25.189  | -4.668 | 8.88E-70  |
| RP11-102E | ENSG00000 | 1.68  | 10.71   | -2.127 | 3.06E-52  |
| GOLGA6B   | ENSG00000 | 0.03  | 12.11   | -3.67  | 5.05E-56  |
| GOLGA8B   | ENSG00000 | 18.75 | 106.92  | -2.45  | 2.10E-33  |
| KCNU1     | ENSG00000 | 0     | 6.29    | -2.866 | 9.98E-56  |
| HOMEZ     | ENSG00000 | 3.62  | 47.389  | -3.389 | 7.01E-62  |
| RNF212B   | ENSG00000 | 0.49  | 11.22   | -3.036 | 1.30E-57  |
| RP11-613F | ENSG00000 | 0     | 3.45    | -2.154 | 2.76E-53  |
| TMCO5B    | ENSG00000 | 0     | 75.94   | -6.266 | 8.14E-74  |
| SLC25A5P1 | ENSG00000 | 0.21  | 13.17   | -3.55  | 1.03E-79  |
| NPEPL1    | ENSG00000 | 13.02 | 60.329  | -2.129 | 3.89E-59  |
| FAM230B   | ENSG00000 | 0.01  | 33.42   | -5.091 | 9.36E-71  |
| GAB4      | ENSG00000 | 0.02  | 4.47    | -2.423 | 1.79E-76  |
| GRK6P1    | ENSG00000 | 0.07  | 3.86    | -2.183 | 1.08E-53  |
| GUSBP9    | ENSG00000 | 1.7   | 25.989  | -3.321 | 1.60E-69  |
| RP13-104F | ENSG00000 | 1.92  | 15.43   | -2.492 | 7.75E-72  |
| ZC3H11B   | ENSG00000 | 0.06  | 6.03    | -2.729 | 7.37E-64  |
| TTC34     | ENSG00000 | 0.16  | 11.8    | -3.464 | 5.49E-83  |
| HIST1H2AI | ENSG00000 | 0     | 22.721  | -4.568 | 7.10E-72  |
| RP11-244K | ENSG00000 | 0     | 9.32    | -3.367 | 7.95E-67  |
| GAPDHP72  | ENSG00000 | 0.03  | 9.52    | -3.352 | 5.57E-68  |
| POM121L4  | ENSG00000 | 0     | 4.81    | -2.539 | 5.49E-52  |
| RPS7P5    | ENSG00000 | 0     | 10.64   | -3.541 | 1.78E-50  |
| PSMC1P11  | ENSG00000 | 0     | 5.13    | -2.616 | 2.21E-57  |
| ISCA1P1   | ENSG00000 | 3.47  | 32.03   | -2.885 | 2.25E-37  |
| SYCE3     | ENSG00000 | 0.57  | 190.506 | -6.93  | 5.82E-88  |
| KRT19P1   | ENSG00000 | 0     | 23.779  | -4.631 | 3.53E-69  |
| RP11-889L | ENSG00000 | 2.3   | 74.718  | -4.52  | 1.10E-127 |
| PAPOLB    | ENSG00000 | 0.05  | 16.45   | -4.055 | 4.89E-73  |
| TEX40     | ENSG00000 | 0     | 12.66   | -3.772 | 1.31E-70  |
| FAM228B   | ENSG00000 | 5.11  | 48.341  | -3.014 | 3.14E-66  |
| RPL23AP47 | ENSG00000 | 0     | 6.31    | -2.87  | 2.04E-12  |
| RP11-394Z | ENSG00000 | 0.25  | 12.13   | -3.393 | 2.78E-42  |
| FLJ35934  | ENSG00000 | 0.79  | 37.131  | -4.413 | 2.59E-75  |
| VAMP2     | ENSG00000 | 17.73 | 86.258  | -2.22  | 7.20E-51  |
| SLC25A51F | ENSG00000 | 0     | 6.93    | -2.987 | 1.00E-58  |
| RP3-406A7 | ENSG00000 | 0     | 9.01    | -3.323 | 9.16E-60  |
| MTMR9LP   | ENSG00000 | 1.38  | 9.26    | -2.108 | 1.25E-24  |
| MAGEA3    | ENSG00000 | 0.13  | 10.39   | -3.333 | 3.40E-35  |

|           |           |      |         |        |          |
|-----------|-----------|------|---------|--------|----------|
| POM121L1  | ENSG00000 | 0    | 16.8    | -4.154 | 4.77E-69 |
| EXOC3-AS  | ENSG00000 | 1.08 | 10.21   | -2.43  | 5.49E-73 |
| RNU2-2P   | ENSG00000 | 0.13 | 10.04   | -3.288 | 8.26E-31 |
| RN7SKP7   | ENSG00000 | 0    | 4.46    | -2.449 | 1.37E-37 |
| RP1-171K1 | ENSG00000 | 0.09 | 3.79    | -2.136 | 6.37E-22 |
| TH2LCRR   | ENSG00000 | 0    | 19.48   | -4.356 | 1.54E-70 |
| RP11-274J | ENSG00000 | 0    | 5.03    | -2.592 | 1.70E-50 |
| RP11-542F | ENSG00000 | 0    | 3.05    | -2.018 | 2.90E-47 |
| RP11-223F | ENSG00000 | 0.02 | 7.5     | -3.059 | 4.51E-56 |
| SMPD4P1   | ENSG00000 | 0    | 3.13    | -2.046 | 6.39E-76 |
| RP11-393K | ENSG00000 | 0    | 3.99    | -2.319 | 6.55E-55 |
| LINC01120 | ENSG00000 | 0.04 | 17.64   | -4.164 | 3.53E-86 |
| RP4-613A2 | ENSG00000 | 0.12 | 16.19   | -3.94  | 1.53E-75 |
| LINC01208 | ENSG00000 | 0.04 | 3.51    | -2.117 | 7.16E-44 |
| RP11-644K | ENSG00000 | 0.06 | 11.51   | -3.561 | 2.32E-68 |
| RP4-717I2 | ENSG00000 | 7.06 | 40.731  | -2.372 | 3.88E-50 |
| MIR503HG  | ENSG00000 | 2.21 | 51.789  | -4.04  | 5.58E-53 |
| FAM95B1   | ENSG00000 | 2.39 | 208.831 | -5.952 | 3.83E-65 |
| RP11-73B2 | ENSG00000 | 0    | 6.01    | -2.809 | 8.64E-55 |
| RP11-430C | ENSG00000 | 0    | 5.71    | -2.746 | 4.80E-56 |
| RP11-252F | ENSG00000 | 0    | 4.08    | -2.345 | 3.84E-49 |
| ROR1-AS1  | ENSG00000 | 0.06 | 4.36    | -2.338 | 9.81E-50 |
| SNRPD2P2  | ENSG00000 | 0    | 14.55   | -3.959 | 1.20E-59 |
| RP4-622L5 | ENSG00000 | 0.14 | 4.05    | -2.147 | 1.47E-63 |
| LINC00633 | ENSG00000 | 0    | 14.44   | -3.949 | 1.59E-60 |
| POM121L1  | ENSG00000 | 0    | 12.18   | -3.72  | 4.13E-56 |
| RP11-433C | ENSG00000 | 0.03 | 3.59    | -2.156 | 3.57E-45 |
| HAGLR     | ENSG00000 | 2.23 | 69.879  | -4.456 | 1.40E-53 |
| LINC00466 | ENSG00000 | 0    | 4.13    | -2.359 | 3.54E-75 |
| RP11-336K | ENSG00000 | 0    | 3.14    | -2.05  | 3.25E-52 |
| MSL3P1    | ENSG00000 | 4.72 | 23.02   | -2.07  | 3.16E-29 |
| RP11-462C | ENSG00000 | 0.11 | 11.44   | -3.486 | 2.49E-66 |
| LINC00703 | ENSG00000 | 0    | 4.94    | -2.57  | 1.13E-58 |
| PRR29     | ENSG00000 | 0.8  | 19.28   | -3.494 | 6.07E-61 |
| RP11-48F1 | ENSG00000 | 0    | 6.63    | -2.932 | 1.58E-44 |
| PRKAR2A-1 | ENSG00000 | 0.42 | 23.76   | -4.124 | 1.61E-70 |
| RP11-61J1 | ENSG00000 | 0    | 4.66    | -2.501 | 3.83E-29 |
| RP11-385M | ENSG00000 | 0.05 | 4.09    | -2.277 | 1.14E-58 |
| LINC01015 | ENSG00000 | 0    | 20.06   | -4.396 | 3.90E-75 |
| GPX5      | ENSG00000 | 0.02 | 4.03    | -2.302 | 2.18E-53 |
| ZMIZ1-AS1 | ENSG00000 | 0.35 | 5.64    | -2.298 | 5.04E-58 |
| HSD52     | ENSG00000 | 0    | 11.45   | -3.638 | 5.07E-64 |
| PDSS1P2   | ENSG00000 | 0    | 9.26    | -3.359 | 1.49E-63 |
| LAMTOR5-1 | ENSG00000 | 2.5  | 43.721  | -3.676 | 1.10E-84 |
| RP11-697E | ENSG00000 | 0    | 3.73    | -2.242 | 3.61E-47 |
| TEX26-AS1 | ENSG00000 | 0.05 | 23.309  | -4.533 | 2.00E-76 |
| RP11-54O1 | ENSG00000 | 0    | 6.32    | -2.872 | 1.72E-55 |
| IQCF4     | ENSG00000 | 0    | 275.192 | -8.11  | 1.39E-73 |
| LINC00240 | ENSG00000 | 1.32 | 9.39    | -2.163 | 6.42E-59 |

|           |           |      |         |        |          |
|-----------|-----------|------|---------|--------|----------|
| RP1-90J20 | ENSG00000 | 0.26 | 12.86   | -3.459 | 2.12E-44 |
| XX-FW810  | ENSG00000 | 0    | 15.75   | -4.066 | 1.38E-58 |
| LARGE-AS1 | ENSG00000 | 0    | 31.18   | -5.008 | 3.11E-64 |
| RP11-160F | ENSG00000 | 0    | 7       | -3     | 6.96E-66 |
| RP11-228E | ENSG00000 | 0.51 | 6.36    | -2.285 | 2.76E-74 |
| RP11-349E | ENSG00000 | 0    | 20.391  | -4.419 | 1.67E-58 |
| HMGB3P22  | ENSG00000 | 0.5  | 21.29   | -3.893 | 7.05E-65 |
| RP11-383C | ENSG00000 | 0    | 5.32    | -2.66  | 3.08E-46 |
| RP11-456F | ENSG00000 | 0    | 12.61   | -3.767 | 1.73E-56 |
| RP1-127D  | ENSG00000 | 0    | 4.87    | -2.553 | 6.07E-52 |
| LA16c-83F | ENSG00000 | 0.09 | 8.46    | -3.117 | 3.60E-75 |
| RP5-937E2 | ENSG00000 | 0.05 | 24.18   | -4.584 | 5.24E-70 |
| PCDH9-AS  | ENSG00000 | 0    | 3.58    | -2.195 | 5.64E-48 |
| TAF1A-AS1 | ENSG00000 | 1.26 | 10.01   | -2.284 | 1.72E-53 |
| RP11-415J | ENSG00000 | 0.58 | 9       | -2.662 | 6.99E-83 |
| RP11-449J | ENSG00000 | 0    | 4.69    | -2.508 | 7.74E-45 |
| SNX18P3   | ENSG00000 | 0.17 | 15.39   | -3.808 | 1.22E-93 |
| RP11-69A2 | ENSG00000 | 0    | 3.65    | -2.217 | 4.89E-60 |
| RP11-3B7  | ENSG00000 | 0.23 | 16.09   | -3.796 | 2.53E-91 |
| RP1-257A1 | ENSG00000 | 0    | 12.74   | -3.78  | 2.92E-63 |
| RAB6C-AS  | ENSG00000 | 0.13 | 5.77    | -2.583 | 1.25E-51 |
| PLCB1-IT1 | ENSG00000 | 0    | 3.28    | -2.098 | 1.52E-44 |
| RP11-760I | ENSG00000 | 0    | 3.9     | -2.293 | 9.19E-66 |
| RP11-390F | ENSG00000 | 0.7  | 26.999  | -4.042 | 9.77E-74 |
| KCNMA1-1  | ENSG00000 | 0    | 4.39    | -2.43  | 1.80E-44 |
| LINC01492 | ENSG00000 | 0    | 4.49    | -2.457 | 6.78E-53 |
| RP11-550F | ENSG00000 | 0    | 8.07    | -3.181 | 1.76E-55 |
| RP11-70C1 | ENSG00000 | 0.07 | 3.72    | -2.141 | 4.99E-60 |
| RP5-1022F | ENSG00000 | 0    | 6.98    | -2.996 | 3.04E-58 |
| FAM225B   | ENSG00000 | 0.16 | 19.34   | -4.132 | 4.10E-76 |
| NRG3-AS1  | ENSG00000 | 0    | 9.33    | -3.369 | 3.36E-55 |
| RP5-850O  | ENSG00000 | 0    | 3.77    | -2.254 | 1.15E-48 |
| PROSER2-1 | ENSG00000 | 0.2  | 6.71    | -2.684 | 1.14E-67 |
| FAM229A   | ENSG00000 | 1.84 | 174.525 | -5.95  | 2.60E-96 |
| RP11-452K | ENSG00000 | 1.14 | 32.491  | -3.968 | 1.31E-57 |
| LINC00694 | ENSG00000 | 0.08 | 49.47   | -5.546 | 1.72E-79 |
| RP3-495K2 | ENSG00000 | 0    | 13.53   | -3.861 | 7.59E-61 |
| RP3-476KE | ENSG00000 | 0    | 3.34    | -2.118 | 2.36E-57 |
| RP11-384K | ENSG00000 | 8.28 | 43.691  | -2.268 | 2.41E-61 |
| ODF2-AS1  | ENSG00000 | 0.31 | 7.87    | -2.759 | 3.59E-68 |
| MTND1P2   | ENSG00000 | 3.32 | 17.08   | -2.065 | 7.33E-06 |
| OR7E19P   | ENSG00000 | 0.03 | 6.58    | -2.88  | 3.15E-58 |
| UBXN10-A  | ENSG00000 | 0.6  | 6.79    | -2.284 | 1.85E-69 |
| KCNIP2-AS | ENSG00000 | 0.11 | 42.851  | -5.304 | 7.35E-79 |
| RP11-180C | ENSG00000 | 0.18 | 10.28   | -3.257 | 1.34E-61 |
| RP4-712E4 | ENSG00000 | 0    | 7.12    | -3.021 | 5.85E-54 |
| TEX22     | ENSG00000 | 0.34 | 13.69   | -3.455 | 6.39E-65 |
| RP11-419C | ENSG00000 | 3.82 | 28.31   | -2.604 | 2.34E-59 |
| LEMD1-AS  | ENSG00000 | 0.09 | 4.07    | -2.218 | 2.76E-69 |

|           |                 |       |        |        |          |
|-----------|-----------------|-------|--------|--------|----------|
| RP11-307F | ENSG00000100000 | 0     | 5.06   | -2.599 | 5.54E-36 |
| GRM7-AS3  | ENSG00000100000 | 0     | 16.05  | -4.092 | 1.37E-59 |
| RP11-61N2 | ENSG00000100000 | 10.06 | 58.63  | -2.431 | 2.55E-30 |
| TMEM1917  | ENSG00000100000 | 11.29 | 150.33 | -3.622 | 2.95E-45 |
| RP11-435M | ENSG00000100000 | 0     | 6.87   | -2.976 | 1.71E-59 |
| ZNF192P1  | ENSG00000100000 | 0.61  | 6.6    | -2.239 | 9.24E-89 |
| ST7-AS2   | ENSG00000100000 | 0     | 3.7    | -2.233 | 3.34E-51 |
| SORCS3-A  | ENSG00000100000 | 0     | 39.221 | -5.33  | 6.44E-74 |
| RP11-358L | ENSG00000100000 | 0     | 6.37   | -2.882 | 6.61E-57 |
| RP11-31F1 | ENSG00000100000 | 2.72  | 24.02  | -2.75  | 1.29E-54 |
| OR8T1P    | ENSG00000100000 | 0.09  | 3.6    | -2.077 | 2.20E-64 |
| RP11-393J | ENSG00000100000 | 0     | 3.49   | -2.167 | 2.65E-49 |
| RP3-462C1 | ENSG00000100000 | 0     | 22.8   | -4.573 | 3.72E-31 |
| RP13-401M | ENSG00000100000 | 6.94  | 34.951 | -2.179 | 2.50E-21 |
| RBM22P3   | ENSG00000100000 | 0     | 7.65   | -3.113 | 1.35E-71 |
| LINC00390 | ENSG00000100000 | 0     | 3.7    | -2.233 | 6.97E-57 |
| LINC00606 | ENSG00000100000 | 0     | 7.07   | -3.013 | 8.41E-55 |
| RP11-340H | ENSG00000100000 | 0.19  | 7.79   | -2.885 | 7.12E-61 |
| LINC00343 | ENSG00000100000 | 0     | 37.741 | -5.276 | 6.49E-74 |
| RP11-128M | ENSG00000100000 | 0.47  | 5.03   | -2.036 | 8.82E-48 |
| KIF4B     | ENSG00000100000 | 0.01  | 3.11   | -2.025 | 9.32E-64 |
| PSMD10P2  | ENSG00000100000 | 0.06  | 4.36   | -2.338 | 4.99E-49 |
| RP11-526L | ENSG00000100000 | 0.05  | 21.29  | -4.408 | 3.76E-71 |
| TEX41     | ENSG00000100000 | 1.96  | 10.88  | -2.005 | 4.84E-62 |
| LENG8-AS1 | ENSG00000100000 | 1.69  | 14.05  | -2.484 | 2.14E-92 |
| LINC00424 | ENSG00000100000 | 0     | 4.7    | -2.511 | 8.65E-55 |
| PSMD5-AS1 | ENSG00000100000 | 7.2   | 38.751 | -2.277 | 1.99E-48 |
| RP5-1024C | ENSG00000100000 | 0.95  | 34.151 | -4.172 | 1.16E-70 |
| SRRM5     | ENSG00000100000 | 0.4   | 57.452 | -5.384 | 3.48E-72 |
| RP11-203E | ENSG00000100000 | 0.96  | 17.97  | -3.275 | 3.35E-98 |
| MROH5     | ENSG00000100000 | 0.1   | 11.07  | -3.456 | 6.21E-55 |
| RP11-148E | ENSG00000100000 | 0.06  | 6.01   | -2.725 | 9.61E-55 |
| RP11-402F | ENSG00000100000 | 0.77  | 13.43  | -3.027 | 2.14E-23 |
| RP11-575L | ENSG00000100000 | 0.18  | 7.96   | -2.925 | 2.21E-72 |
| LINC01359 | ENSG00000100000 | 0.05  | 4.3    | -2.336 | 4.00E-89 |
| LINC00354 | ENSG00000100000 | 0     | 9.74   | -3.425 | 3.05E-65 |
| LINC00454 | ENSG00000100000 | 0     | 19.7   | -4.372 | 8.99E-86 |
| RBM11J    | ENSG00000100000 | 0     | 5.72   | -2.748 | 2.46E-68 |
| LINC00658 | ENSG00000100000 | 0     | 77.128 | -6.288 | 6.11E-76 |
| RP5-956O  | ENSG00000100000 | 0.03  | 8.68   | -3.232 | 5.66E-62 |
| RP11-168F | ENSG00000100000 | 0     | 12.35  | -3.739 | 4.11E-61 |
| LINC00511 | ENSG00000100000 | 1.26  | 13.42  | -2.674 | 1.09E-40 |
| RP11-286M | ENSG00000100000 | 0     | 16.31  | -4.114 | 2.07E-66 |
| RBMX2P5   | ENSG00000100000 | 0.03  | 7.31   | -3.012 | 7.26E-64 |
| RP11-433J | ENSG00000100000 | 0     | 10.92  | -3.575 | 3.17E-61 |
| LBX1-AS1  | ENSG00000100000 | 0.28  | 12.48  | -3.397 | 3.09E-55 |
| RP11-5457 | ENSG00000100000 | 0.15  | 6.89   | -2.778 | 1.06E-71 |
| RP11-196L | ENSG00000100000 | 0.32  | 12.39  | -3.343 | 3.30E-47 |
| RP11-214L | ENSG00000100000 | 0     | 10.73  | -3.552 | 9.95E-55 |

|           |           |          |          |        |          |
|-----------|-----------|----------|----------|--------|----------|
| RP11-317F | ENSG00000 | 0        | 10.24    | -3.491 | 3.95E-47 |
| MIR663AH  | ENSG00000 | 0.1      | 45.069   | -5.388 | 1.95E-74 |
| RP11-121F | ENSG00000 | 0        | 4.45     | -2.446 | 3.57E-49 |
| XXbac-BCX | ENSG00000 | 0        | 4.51     | -2.462 | 1.89E-50 |
| RP11-367J | ENSG00000 | 0        | 5.83     | -2.772 | 5.65E-42 |
| RP11-203J | ENSG00000 | 0.23     | 10.07    | -3.17  | 1.40E-73 |
| SPANXB1   | ENSG00000 | 0.24     | 92.161   | -6.231 | 7.16E-66 |
| SMIM2-AS  | ENSG00000 | 0.84     | 12.09    | -2.831 | 2.24E-56 |
| LINC01364 | ENSG00000 | 0        | 11.19    | -3.608 | 7.74E-53 |
| RP4-669P1 | ENSG00000 | 0.52     | 13.57    | -3.261 | 2.60E-79 |
| STK4-AS1  | ENSG00000 | 0.24     | 4.49     | -2.146 | 4.28E-62 |
| RP11-152M | ENSG00000 | 3.91     | 23.74    | -2.333 | 1.02E-70 |
| SPAG5-AS  | ENSG00000 | 1.49     | 45.01    | -4.208 | 3.13E-94 |
| RP5-905H  | ENSG00000 | 0        | 17.81    | -4.233 | 1.07E-61 |
| RP1-2801C | ENSG00000 | 0.5      | 7.07     | -2.428 | 1.29E-78 |
| LINC01068 | ENSG00000 | 0        | 4.58     | -2.48  | 2.80E-58 |
| RP11-730G | ENSG00000 | 0.4      | 8.64     | -2.784 | 1.48E-46 |
| RP11-578F | ENSG00000 | 0        | 19.46    | -4.355 | 7.37E-64 |
| PSPC1P1   | ENSG00000 | 0        | 5.46     | -2.692 | 4.38E-59 |
| RP11-102C | ENSG00000 | 0        | 21.96    | -4.521 | 1.35E-60 |
| RP11-73B2 | ENSG00000 | 0.55     | 6.15     | -2.206 | 4.48E-50 |
| RP11-141M | ENSG00000 | 0        | 3.74     | -2.245 | 3.03E-49 |
| RP11-143M | ENSG00000 | 0.06     | 18.47    | -4.199 | 1.70E-61 |
| RP11-191M | ENSG00000 | 0        | 21.64    | -4.501 | 5.52E-68 |
| RP11-372M | ENSG00000 | 0        | 4.35     | -2.42  | 3.92E-42 |
| LINC01341 | ENSG00000 | 1.16     | 12.95    | -2.691 | 6.90E-47 |
| RP11-383C | ENSG00000 | 0.05     | 10.88    | -3.5   | 4.90E-64 |
| RP11-69E1 | ENSG00000 | 0        | 12.48    | -3.753 | 4.63E-67 |
| MFI2-AS1  | ENSG00000 | 3.95     | 68.379   | -3.809 | 9.20E-71 |
| RP11-165F | ENSG00000 | 0.13     | 5.48     | -2.52  | 5.73E-60 |
| RP3-467K1 | ENSG00000 | 0.02     | 4.77     | -2.5   | 6.79E-69 |
| RP1-317E2 | ENSG00000 | 0.67     | 11.24    | -2.874 | 9.16E-79 |
| RP11-244M | ENSG00000 | 0        | 4.25     | -2.392 | 9.09E-39 |
| RP13-60M  | ENSG00000 | 0        | 8.21     | -3.203 | 4.56E-55 |
| MT-ATP8   | ENSG00000 | 6584.233 | 28407.81 | -2.109 | 2.00E-30 |
| RP11-137C | ENSG00000 | 0        | 7.77     | -3.133 | 2.32E-63 |
| RALY-AS1  | ENSG00000 | 1.39     | 18.379   | -3.019 | 1.78E-66 |
| PCAT6     | ENSG00000 | 4.29     | 119.684  | -4.512 | 7.97E-67 |
| RP11-132M | ENSG00000 | 0        | 78.858   | -6.319 | 2.60E-72 |
| LINC01350 | ENSG00000 | 0        | 79.798   | -6.336 | 3.16E-69 |
| RP11-235C | ENSG00000 | 0.04     | 10.93    | -3.52  | 2.91E-69 |
| RP11-206L | ENSG00000 | 2.76     | 14.94    | -2.084 | 2.02E-29 |
| RPL17P43  | ENSG00000 | 0.3      | 13.96    | -3.525 | 4.49E-52 |
| RP5-845O2 | ENSG00000 | 0        | 10.54    | -3.529 | 3.03E-53 |
| MIR646HG  | ENSG00000 | 0.6      | 17.179   | -3.506 | 1.26E-56 |
| RP11-365F | ENSG00000 | 0.2      | 7.69     | -2.856 | 1.40E-59 |
| RP11-85L2 | ENSG00000 | 0.06     | 27.971   | -4.772 | 9.96E-57 |
| GAS2L1P2  | ENSG00000 | 0.22     | 8.1      | -2.899 | 1.93E-54 |
| LINC00687 | ENSG00000 | 0        | 15.8     | -4.07  | 1.84E-63 |

|            |           |      |        |        |          |
|------------|-----------|------|--------|--------|----------|
| RP5-864K1  | ENSG00000 | 0.52 | 20.05  | -3.792 | 3.09E-69 |
| LINC01125  | ENSG00000 | 5.18 | 46.09  | -2.93  | 5.77E-49 |
| LINC01013  | ENSG00000 | 0.16 | 6.27   | -2.648 | 5.70E-52 |
| RP11-347C  | ENSG00000 | 0    | 8.49   | -3.246 | 1.04E-61 |
| RP4-586O   | ENSG00000 | 0    | 81.007 | -6.358 | 1.24E-68 |
| RP11-108M  | ENSG00000 | 0.24 | 11.37  | -3.318 | 6.89E-58 |
| HOTAIR     | ENSG00000 | 0.09 | 6.77   | -2.834 | 1.02E-54 |
| RP5-1051F  | ENSG00000 | 0.35 | 99.898 | -6.224 | 2.24E-61 |
| LINC00448  | ENSG00000 | 0    | 7.9    | -3.154 | 5.39E-55 |
| RP4-676J1  | ENSG00000 | 0    | 3.06   | -2.021 | 1.26E-50 |
| RP11-336A  | ENSG00000 | 0    | 3.6    | -2.202 | 1.13E-38 |
| RP3-335N   | ENSG00000 | 0    | 8.6    | -3.263 | 1.71E-60 |
| TNKS2-AS   | ENSG00000 | 1.12 | 13.43  | -2.767 | 1.26E-58 |
| RP11-284C  | ENSG00000 | 0    | 4.19   | -2.376 | 6.04E-56 |
| GS1-18A1   | ENSG00000 | 0    | 5.2    | -2.632 | 9.06E-58 |
| GABRG3-A   | ENSG00000 | 0    | 41.659 | -5.415 | 9.24E-69 |
| RP13-39P1  | ENSG00000 | 8.45 | 63.109 | -2.762 | 2.17E-41 |
| RP11-242F  | ENSG00000 | 0.01 | 6.08   | -2.809 | 1.34E-60 |
| RP4-784A1  | ENSG00000 | 0    | 3.34   | -2.118 | 2.31E-44 |
| PIK3IP1-AS | ENSG00000 | 0.26 | 8.7    | -2.945 | 4.28E-99 |
| TSPY3      | ENSG00000 | 0.32 | 7.09   | -2.616 | 1.16E-05 |
| HOMER2P    | ENSG00000 | 0.21 | 5.08   | -2.329 | 2.43E-09 |
| RP11-265C  | ENSG00000 | 0.19 | 4.82   | -2.29  | 7.91E-06 |
| LINC01277  | ENSG00000 | 0.02 | 5.41   | -2.652 | 2.06E-54 |
| HSFY1P1    | ENSG00000 | 0    | 3.01   | -2.004 | 4.47E-50 |
| SPRR2C     | ENSG00000 | 0    | 47.669 | -5.605 | 3.11E-67 |
| RP11-20P5  | ENSG00000 | 0    | 3.38   | -2.131 | 4.94E-53 |
| LINC01548  | ENSG00000 | 0    | 14.08  | -3.915 | 7.46E-61 |
| RP11-250F  | ENSG00000 | 0.12 | 6.61   | -2.764 | 7.87E-46 |
| PGA4       | ENSG00000 | 0.05 | 4.19   | -2.305 | 5.17E-32 |
| LINC00710  | ENSG00000 | 0    | 63.848 | -6.019 | 1.18E-69 |
| HNRNPA1F   | ENSG00000 | 0.14 | 4.29   | -2.214 | 2.20E-52 |
| RP11-552C  | ENSG00000 | 0    | 14.85  | -3.986 | 3.18E-73 |
| POM121L8   | ENSG00000 | 0    | 22.38  | -4.547 | 7.21E-67 |
| MCHR2-AS   | ENSG00000 | 0    | 99.442 | -6.65  | 4.43E-78 |
| KRT8P12    | ENSG00000 | 6.25 | 32.599 | -2.212 | 7.09E-46 |
| LINC00452  | ENSG00000 | 0.03 | 5.24   | -2.599 | 1.16E-69 |
| RP11-12M   | ENSG00000 | 0    | 9.52   | -3.395 | 5.37E-62 |
| RP11-494C  | ENSG00000 | 0    | 8.18   | -3.199 | 1.03E-27 |
| RP11-202I  | ENSG00000 | 0    | 5.55   | -2.711 | 4.22E-51 |
| RP11-202C  | ENSG00000 | 0    | 6.99   | -2.998 | 8.52E-55 |
| LINC01523  | ENSG00000 | 0    | 6.37   | -2.882 | 5.64E-59 |
| RP11-119E  | ENSG00000 | 0.69 | 5.95   | -2.04  | 3.42E-56 |
| UBE2DNL    | ENSG00000 | 0.52 | 34.951 | -4.564 | 2.48E-59 |
| RP11-423C  | ENSG00000 | 0.05 | 4.33   | -2.344 | 1.83E-58 |
| RP5-827L5  | ENSG00000 | 0    | 12.29  | -3.732 | 4.10E-58 |
| RP11-390F  | ENSG00000 | 0.1  | 4.48   | -2.317 | 2.22E-44 |
| LINC01501  | ENSG00000 | 0.04 | 3.66   | -2.164 | 1.75E-54 |
| ISPD-AS1   | ENSG00000 | 0.11 | 10.64  | -3.39  | 6.70E-57 |

|           |           |      |         |        |          |
|-----------|-----------|------|---------|--------|----------|
| RP11-374M | ENSG00000 | 0    | 64.829  | -6.041 | 5.36E-74 |
| XX-CR54.1 | ENSG00000 | 0.09 | 14.32   | -3.813 | 4.57E-88 |
| RP5-971N  | ENSG00000 | 0.02 | 8.06    | -3.151 | 1.34E-75 |
| RP11-298F | ENSG00000 | 0    | 3.49    | -2.167 | 6.75E-45 |
| UBE2Q1-A  | ENSG00000 | 0.1  | 7.11    | -2.882 | 6.75E-72 |
| SNRPF2    | ENSG00000 | 0    | 3.27    | -2.094 | 2.40E-44 |
| ZNF688    | ENSG00000 | 5.43 | 41.821  | -2.735 | 4.18E-59 |
| PGA3      | ENSG00000 | 0.1  | 10.78   | -3.421 | 2.35E-59 |
| RP11-363M | ENSG00000 | 0    | 3.75    | -2.248 | 7.91E-66 |
| RP11-668C | ENSG00000 | 0.02 | 15.95   | -4.055 | 1.03E-62 |
| HSPD1P21  | ENSG00000 | 0    | 17.81   | -4.233 | 2.39E-77 |
| RHEBP1    | ENSG00000 | 1.78 | 10.5    | -2.049 | 7.68E-35 |
| PRPS1L1   | ENSG00000 | 0.05 | 37.379  | -5.192 | 2.95E-82 |
| ZRANB2-A  | ENSG00000 | 0.45 | 5.41    | -2.144 | 5.75E-88 |
| RP11-366F | ENSG00000 | 0.03 | 4.53    | -2.425 | 5.58E-44 |
| IQCF3     | ENSG00000 | 0.03 | 177.293 | -7.435 | 6.42E-71 |
| TOB1-AS1  | ENSG00000 | 0.59 | 10.2    | -2.816 | 1.04E-69 |
| RP5-905H  | ENSG00000 | 0.09 | 42.851  | -5.33  | 1.68E-61 |
| RP11-217E | ENSG00000 | 0.07 | 43.449  | -5.376 | 2.85E-73 |
| RP11-80B9 | ENSG00000 | 0    | 30.33   | -4.969 | 5.23E-61 |
| LINC00364 | ENSG00000 | 0    | 4.15    | -2.365 | 1.46E-42 |
| RP11-402C | ENSG00000 | 0    | 77.541  | -6.295 | 2.53E-71 |
| RP11-407E | ENSG00000 | 0.07 | 12.69   | -3.677 | 3.78E-54 |
| RP11-232C | ENSG00000 | 1.91 | 24.429  | -3.127 | 2.43E-22 |
| FAM92A1P  | ENSG00000 | 0.01 | 13.6    | -3.854 | 8.50E-63 |
| RP4-697K1 | ENSG00000 | 0    | 3.09    | -2.032 | 1.02E-45 |
| SPATA31C  | ENSG00000 | 0.1  | 17.45   | -4.068 | 9.15E-68 |
| RP11-90C4 | ENSG00000 | 0    | 3.37    | -2.128 | 1.74E-50 |
| RP11-334J | ENSG00000 | 0.5  | 9.36    | -2.788 | 7.69E-67 |
| NAALADL2  | ENSG00000 | 0    | 4.65    | -2.498 | 1.93E-43 |
| RP11-213C | ENSG00000 | 0    | 28.019  | -4.859 | 8.01E-84 |
| TPI1P2    | ENSG00000 | 0.46 | 4.91    | -2.017 | 5.09E-43 |
| VN1R32P   | ENSG00000 | 0.05 | 14.04   | -3.84  | 4.37E-76 |
| KARSP2    | ENSG00000 | 0.04 | 6.57    | -2.864 | 3.10E-74 |
| GOLGA6L5  | ENSG00000 | 2.33 | 43.09   | -3.727 | 3.17E-94 |
| RP4-737E2 | ENSG00000 | 0.01 | 12.48   | -3.738 | 4.99E-69 |
| LINC01066 | ENSG00000 | 0    | 4.75    | -2.524 | 2.08E-49 |
| RP5-902P8 | ENSG00000 | 0.81 | 23.53   | -3.76  | 5.11E-99 |
| RP11-14O  | ENSG00000 | 0    | 6.77    | -2.958 | 4.77E-45 |
| RP11-390E | ENSG00000 | 0    | 7.05    | -3.009 | 1.03E-51 |
| LRRC37A6F | ENSG00000 | 0.2  | 5.11    | -2.348 | 5.67E-63 |
| U73166.2  | ENSG00000 | 0.16 | 26.87   | -4.587 | 1.10E-83 |
| PROX1-AS  | ENSG00000 | 0    | 6.63    | -2.932 | 3.50E-60 |
| NOS2P3    | ENSG00000 | 0.06 | 13.25   | -3.749 | 5.27E-77 |
| RP11-95M  | ENSG00000 | 0    | 4.5     | -2.459 | 1.23E-54 |
| RP11-297A | ENSG00000 | 0.06 | 8.93    | -3.228 | 5.69E-81 |
| RP11-74C1 | ENSG00000 | 0.04 | 7.63    | -3.053 | 4.28E-65 |
| LINC01183 | ENSG00000 | 0.21 | 17.579  | -3.941 | 4.67E-72 |
| RP5-828H9 | ENSG00000 | 0.03 | 16.62   | -4.096 | 1.11E-63 |



|           |                 |        |         |        |           |
|-----------|-----------------|--------|---------|--------|-----------|
| ZNF32-AS2 | ENSG00000100000 | 0.44   | 5.03    | -2.066 | 1.24E-77  |
| GPAA1P2   | ENSG00000100000 | 0.82   | 6.75    | -2.09  | 1.18E-50  |
| RP11-402C | ENSG00000100000 | 0      | 30.26   | -4.966 | 4.82E-67  |
| RP5-1198C | ENSG00000100000 | 1.29   | 11.1    | -2.402 | 7.89E-46  |
| RP11-286F | ENSG00000100000 | 0.14   | 6.39    | -2.697 | 8.23E-66  |
| RP3-406P2 | ENSG00000100000 | 0      | 4.84    | -2.546 | 1.28E-41  |
| RGPD4-AS  | ENSG00000100000 | 0      | 32.581  | -5.07  | 1.30E-82  |
| SAP18P3   | ENSG00000100000 | 0      | 3.35    | -2.121 | 9.19E-49  |
| LINC01001 | ENSG00000100000 | 36.849 | 169.177 | -2.169 | 7.59E-29  |
| RP4-738P1 | ENSG00000100000 | 0.01   | 5.39    | -2.662 | 1.69E-58  |
| ZNF341-A5 | ENSG00000100000 | 0      | 4.84    | -2.546 | 8.64E-60  |
| RP11-251F | ENSG00000100000 | 0      | 52.091  | -5.73  | 1.09E-67  |
| FOXD3-AS  | ENSG00000100000 | 0.17   | 13.55   | -3.636 | 3.52E-05  |
| RP5-968J1 | ENSG00000100000 | 0      | 5.53    | -2.707 | 4.10E-44  |
| RP11-383M | ENSG00000100000 | 0      | 3.33    | -2.114 | 7.21E-55  |
| RP11-195E | ENSG00000100000 | 0.12   | 3.95    | -2.144 | 4.66E-11  |
| RP11-379C | ENSG00000100000 | 0      | 3.77    | -2.254 | 1.53E-51  |
| STMND1    | ENSG00000100000 | 0.05   | 7       | -2.93  | 1.73E-61  |
| LINC00692 | ENSG00000100000 | 0      | 5.44    | -2.687 | 3.42E-59  |
| RP11-314C | ENSG00000100000 | 0.24   | 4.09    | -2.037 | 5.29E-68  |
| RP4-631H1 | ENSG00000100000 | 0      | 5.3     | -2.655 | 4.38E-27  |
| LINC00326 | ENSG00000100000 | 0      | 13.32   | -3.84  | 9.99E-67  |
| LINC00271 | ENSG00000100000 | 0.14   | 14.52   | -3.767 | 2.54E-81  |
| RP1-140A9 | ENSG00000100000 | 0.13   | 4.47    | -2.275 | 2.10E-64  |
| RP11-263k | ENSG00000100000 | 1.22   | 15.56   | -2.899 | 6.61E-57  |
| RP11-514F | ENSG00000100000 | 0      | 3.27    | -2.094 | 4.29E-38  |
| TSSK1A    | ENSG00000100000 | 0.18   | 6.78    | -2.721 | 3.40E-77  |
| RP5-1073C | ENSG00000100000 | 0      | 9.09    | -3.335 | 1.09E-73  |
| HAR1B     | ENSG00000100000 | 0.05   | 6.24    | -2.786 | 9.88E-57  |
| RP1-207H1 | ENSG00000100000 | 0.03   | 5.03    | -2.549 | 1.24E-49  |
| RP11-34D1 | ENSG00000100000 | 0      | 8.35    | -3.225 | 6.63E-61  |
| RP11-495F | ENSG00000100000 | 0.37   | 7.88    | -2.696 | 6.05E-43  |
| PCED1CP   | ENSG00000100000 | 0      | 4.71    | -2.513 | 6.52E-69  |
| RP11-723C | ENSG00000100000 | 0.7    | 9.52    | -2.63  | 2.64E-70  |
| RP1-225E1 | ENSG00000100000 | 0.09   | 7.44    | -2.953 | 2.82E-101 |
| RP11-148E | ENSG00000100000 | 0      | 3.28    | -2.098 | 1.58E-34  |
| RP11-413C | ENSG00000100000 | 0      | 7.8     | -3.138 | 2.00E-54  |
| FAR2P4    | ENSG00000100000 | 0.11   | 21.769  | -4.358 | 6.32E-64  |
| LINC00441 | ENSG00000100000 | 0.07   | 7.83    | -3.045 | 1.28E-68  |
| FAM225A   | ENSG00000100000 | 0.77   | 36.969  | -4.423 | 1.83E-77  |
| RP11-410C | ENSG00000100000 | 0      | 4.11    | -2.353 | 2.19E-56  |
| LINC01249 | ENSG00000100000 | 0.21   | 9.07    | -3.057 | 4.34E-27  |
| RP11-162k | ENSG00000100000 | 0      | 6.59    | -2.924 | 2.44E-56  |
| FAHD2CP   | ENSG00000100000 | 6.83   | 47.52   | -2.631 | 7.33E-64  |
| RP11-575L | ENSG00000100000 | 0.05   | 10.14   | -3.407 | 1.05E-74  |
| RPS6KA2-1 | ENSG00000100000 | 0      | 13.94   | -3.901 | 2.62E-62  |
| RP11-404C | ENSG00000100000 | 0.07   | 8.07    | -3.083 | 1.58E-65  |
| LINC-PINT | ENSG00000100000 | 1.78   | 13.86   | -2.418 | 5.63E-61  |
| TSPAN19   | ENSG00000100000 | 0.06   | 5.98    | -2.719 | 3.96E-58  |

|           |           |      |         |        |          |
|-----------|-----------|------|---------|--------|----------|
| RP11-227F | ENSG00000 | 0.21 | 4.35    | -2.144 | 1.25E-22 |
| RP11-402F | ENSG00000 | 0    | 9.05    | -3.329 | 6.24E-27 |
| PCAT7     | ENSG00000 | 0.19 | 4.12    | -2.105 | 3.97E-39 |
| LINC01388 | ENSG00000 | 0    | 3.05    | -2.018 | 1.88E-56 |
| LINC01198 | ENSG00000 | 3.38 | 38.62   | -3.177 | 4.94E-27 |
| PRH1      | ENSG00000 | 1.18 | 80.738  | -5.229 | 2.32E-63 |
| RP11-29BC | ENSG00000 | 0    | 6.47    | -2.901 | 4.02E-52 |
| RP11-557F | ENSG00000 | 0    | 4.57    | -2.478 | 1.42E-51 |
| LINC00202 | ENSG00000 | 0.71 | 213.027 | -6.968 | 1.96E-76 |
| PPP1R2P3  | ENSG00000 | 0.06 | 50.611  | -5.606 | 2.42E-76 |
| RP11-111F | ENSG00000 | 0.35 | 8.33    | -2.789 | 1.26E-45 |
| FLJ27354  | ENSG00000 | 0.71 | 39.021  | -4.549 | 1.08E-99 |
| LEF1-AS1  | ENSG00000 | 0.21 | 49.6    | -5.386 | 3.22E-82 |
| ZBED9     | ENSG00000 | 1.26 | 12.72   | -2.602 | 7.96E-69 |
| XXbac-BPC | ENSG00000 | 0    | 29.9    | -4.95  | 1.05E-65 |
| RFX3-AS1  | ENSG00000 | 0.26 | 5.79    | -2.43  | 6.83E-75 |
| RP11-360I | ENSG00000 | 0    | 32.479  | -5.065 | 3.05E-74 |
| RP3-461P1 | ENSG00000 | 0    | 14.9    | -3.991 | 4.13E-65 |
| RP11-302L | ENSG00000 | 0    | 8.28    | -3.214 | 5.62E-67 |
| LINC00202 | ENSG00000 | 1.25 | 91.842  | -5.367 | 4.76E-54 |
| LINC00865 | ENSG00000 | 0.36 | 21.421  | -4.043 | 4.68E-73 |
| RP11-4C2C | ENSG00000 | 0    | 3.11    | -2.039 | 1.46E-52 |
| XXyac-YX1 | ENSG00000 | 2.51 | 88.223  | -4.668 | 9.55E-48 |
| RP11-240L | ENSG00000 | 0    | 3.3     | -2.104 | 1.01E-72 |
| GNG12-AS  | ENSG00000 | 0.04 | 3.68    | -2.17  | 2.66E-56 |
| RP4-715N  | ENSG00000 | 0    | 4.84    | -2.546 | 5.85E-71 |
| RP11-154I | ENSG00000 | 0.06 | 20.09   | -4.314 | 1.21E-71 |
| RP11-46O  | ENSG00000 | 0    | 4.14    | -2.362 | 3.35E-41 |
| VIPR1-AS1 | ENSG00000 | 0.04 | 4.43    | -2.384 | 5.62E-43 |
| RP3-399L1 | ENSG00000 | 0    | 3.17    | -2.06  | 2.75E-45 |
| RP5-1022J | ENSG00000 | 0    | 7.81    | -3.139 | 1.97E-52 |
| OSBPL10-1 | ENSG00000 | 0    | 14.74   | -3.976 | 3.52E-67 |
| RP11-403M | ENSG00000 | 0    | 4.15    | -2.365 | 1.42E-53 |
| XXbac-BPC | ENSG00000 | 0    | 7.96    | -3.163 | 5.89E-65 |
| RP11-385M | ENSG00000 | 0.1  | 8.31    | -3.081 | 3.12E-52 |
| RSU1P2    | ENSG00000 | 0    | 7.87    | -3.149 | 9.72E-57 |
| LINC01517 | ENSG00000 | 0.07 | 7.1     | -2.92  | 9.36E-65 |
| LINC00385 | ENSG00000 | 0    | 7.27    | -3.048 | 9.41E-49 |
| LINC01431 | ENSG00000 | 0.7  | 16.939  | -3.4   | 3.51E-70 |
| GOLGA8N   | ENSG00000 | 2.11 | 28.019  | -3.222 | 2.27E-71 |
| RP4-718D  | ENSG00000 | 0    | 4.43    | -2.441 | 3.94E-41 |
| LINC00442 | ENSG00000 | 0    | 20.33   | -4.415 | 1.45E-65 |
| MARK2P9   | ENSG00000 | 0.05 | 7.07    | -2.942 | 5.36E-73 |
| KIZ-AS1   | ENSG00000 | 0.01 | 3.3     | -2.09  | 3.10E-53 |
| LINC01022 | ENSG00000 | 0    | 4.66    | -2.501 | 1.81E-61 |
| YWHAEP1   | ENSG00000 | 0.05 | 10.8    | -3.49  | 1.96E-72 |
| RP11-382F | ENSG00000 | 0.31 | 6.47    | -2.512 | 2.52E-29 |
| RP11-498E | ENSG00000 | 0.18 | 44.56   | -5.271 | 1.76E-61 |
| LMLN-AS1  | ENSG00000 | 0.05 | 4.01    | -2.254 | 2.30E-54 |

|           |           |        |         |        |           |
|-----------|-----------|--------|---------|--------|-----------|
| SNX18P2   | ENSG00000 | 0      | 3.01    | -2.004 | 8.01E-50  |
| SMG7-AS1  | ENSG00000 | 0.27   | 23.669  | -4.28  | 3.46E-80  |
| RP4-665N2 | ENSG00000 | 0.03   | 10.54   | -3.486 | 1.80E-69  |
| SEC1P     | ENSG00000 | 0.08   | 6.59    | -2.813 | 3.98E-70  |
| RP5-11157 | ENSG00000 | 0.11   | 4.79    | -2.383 | 2.11E-54  |
| PLCE1-AS2 | ENSG00000 | 0      | 22.11   | -4.53  | 4.99E-69  |
| LINC00342 | ENSG00000 | 3.27   | 93.118  | -4.462 | 6.76E-106 |
| VPS13A-A1 | ENSG00000 | 0      | 24.55   | -4.675 | 2.02E-64  |
| RP11-475C | ENSG00000 | 0.03   | 5.88    | -2.74  | 1.12E-71  |
| RP5-908M  | ENSG00000 | 0      | 20.21   | -4.407 | 6.45E-65  |
| RP11-1212 | ENSG00000 | 64.382 | 306.384 | -2.233 | 5.30E-48  |
| RP11-24P1 | ENSG00000 | 0      | 6.17    | -2.842 | 6.78E-49  |
| RP5-930J4 | ENSG00000 | 0      | 3.08    | -2.029 | 3.39E-38  |
| RP11-90C2 | ENSG00000 | 0      | 3.06    | -2.021 | 5.45E-42  |
| RP11-440C | ENSG00000 | 0.1    | 4.06    | -2.202 | 3.57E-50  |
| RP11-375C | ENSG00000 | 0.01   | 5.37    | -2.657 | 1.60E-61  |
| HOXB-AS3  | ENSG00000 | 0.48   | 9.03    | -2.761 | 1.41E-46  |
| VN1R20P   | ENSG00000 | 0.1    | 3.73    | -2.104 | 2.96E-83  |
| RP11-364E | ENSG00000 | 0      | 16.17   | -4.102 | 1.12E-48  |
| UBE2E2-A1 | ENSG00000 | 0      | 12.21   | -3.724 | 3.54E-75  |
| RP11-863K | ENSG00000 | 1.36   | 8.62    | -2.027 | 3.39E-49  |
| RP11-536F | ENSG00000 | 0      | 3.32    | -2.111 | 3.74E-45  |
| RP3-468B3 | ENSG00000 | 0.03   | 24.01   | -4.602 | 3.54E-73  |
| RP11-67L3 | ENSG00000 | 0.43   | 23.28   | -4.086 | 4.59E-62  |
| LINC00642 | ENSG00000 | 0.01   | 7.45    | -3.065 | 1.68E-61  |
| LINC00167 | ENSG00000 | 0.04   | 3.49    | -2.11  | 6.54E-65  |
| NPIP7     | ENSG00000 | 0.4    | 33.77   | -4.634 | 1.88E-75  |
| LINC00472 | ENSG00000 | 0.11   | 4.03    | -2.18  | 3.88E-73  |
| RP11-415J | ENSG00000 | 0      | 15.82   | -4.072 | 1.97E-68  |
| LINC00264 | ENSG00000 | 0.09   | 50.422  | -5.56  | 5.85E-76  |
| RP5-1030M | ENSG00000 | 0      | 5.73    | -2.751 | 1.29E-54  |
| RP5-875O1 | ENSG00000 | 0.19   | 17.43   | -3.953 | 2.27E-64  |
| STXBP5-A1 | ENSG00000 | 0.14   | 11.43   | -3.447 | 7.52E-74  |
| RP11-295C | ENSG00000 | 3.33   | 55.001  | -3.693 | 1.78E-68  |
| LINC01518 | ENSG00000 | 0      | 8.34    | -3.223 | 1.98E-79  |
| RP3-486I3 | ENSG00000 | 0.93   | 10.2    | -2.537 | 2.84E-70  |
| LINC00690 | ENSG00000 | 0      | 7.44    | -3.077 | 1.41E-62  |
| RP4-665J2 | ENSG00000 | 1.31   | 12.94   | -2.593 | 6.68E-58  |
| RP11-22M  | ENSG00000 | 0      | 8.51    | -3.249 | 6.58E-54  |
| RP11-123C | ENSG00000 | 0      | 4.12    | -2.356 | 1.88E-46  |
| LINC01251 | ENSG00000 | 0.05   | 11.15   | -3.532 | 1.12E-81  |
| RP11-295C | ENSG00000 | 0      | 7.98    | -3.167 | 7.78E-61  |
| TSPY4     | ENSG00000 | 1.53   | 36.131  | -3.875 | 8.57E-08  |
| RP4-650F1 | ENSG00000 | 0      | 17.759  | -4.23  | 2.25E-73  |
| LINC01360 | ENSG00000 | 0      | 5.63    | -2.729 | 1.73E-36  |
| RP11-823F | ENSG00000 | 0.02   | 15.12   | -3.982 | 3.94E-63  |
| PPP1R2P2  | ENSG00000 | 0.07   | 8.55    | -3.158 | 9.49E-64  |
| PAGE2     | ENSG00000 | 0.89   | 32.45   | -4.146 | 8.19E-37  |
| RP11-1217 | ENSG00000 | 0      | 22.59   | -4.56  | 1.73E-67  |

|            |           |      |         |        |          |
|------------|-----------|------|---------|--------|----------|
| RP11-168C  | ENSG00000 | 0    | 15.76   | -4.067 | 3.45E-54 |
| RP11-395L  | ENSG00000 | 0    | 9.1     | -3.336 | 9.96E-65 |
| RP11-446F  | ENSG00000 | 0    | 3.1     | -2.036 | 7.04E-44 |
| LINC01191  | ENSG00000 | 0.19 | 172.792 | -7.19  | 3.12E-72 |
| RP5-94211  | ENSG00000 | 0.11 | 54.738  | -5.65  | 2.37E-79 |
| RP11-3151  | ENSG00000 | 0.51 | 17.55   | -3.619 | 1.25E-74 |
| TMEM229    | ENSG00000 | 0.21 | 5.42    | -2.408 | 2.45E-54 |
| RP11-3531  | ENSG00000 | 0.09 | 10.58   | -3.409 | 1.91E-64 |
| RP3-325F2  | ENSG00000 | 0    | 34.859  | -5.164 | 1.31E-62 |
| RP11-157E  | ENSG00000 | 0    | 36.511  | -5.229 | 2.36E-74 |
| TULP3P1    | ENSG00000 | 0    | 3.63    | -2.211 | 1.24E-68 |
| RPL36P20   | ENSG00000 | 0    | 9.85    | -3.44  | 8.29E-69 |
| RP13-16H   | ENSG00000 | 0    | 18.371  | -4.276 | 2.77E-69 |
| LINC00229  | ENSG00000 | 0    | 12.92   | -3.799 | 6.39E-59 |
| RP11-52J3  | ENSG00000 | 0    | 5.43    | -2.685 | 1.30E-54 |
| RP11-3401  | ENSG00000 | 0.09 | 13.82   | -3.765 | 1.34E-72 |
| RP11-561C  | ENSG00000 | 0.08 | 34.391  | -5.034 | 3.17E-74 |
| RBM1Y1A1   | ENSG00000 | 0.07 | 11.47   | -3.543 | 7.04E-62 |
| FGF14-AS1  | ENSG00000 | 0    | 14.23   | -3.929 | 4.88E-61 |
| SLC16A12   | ENSG00000 | 0    | 8.73    | -3.282 | 4.99E-52 |
| ERICH3-AS1 | ENSG00000 | 0    | 3.93    | -2.302 | 4.01E-41 |
| RP11-78H   | ENSG00000 | 0    | 5.53    | -2.707 | 1.12E-45 |
| LINC01309  | ENSG00000 | 0    | 5.92    | -2.791 | 1.26E-43 |
| RPSAP9     | ENSG00000 | 1.01 | 7.49    | -2.079 | 3.36E-69 |
| RP1-149A1  | ENSG00000 | 0    | 3.43    | -2.147 | 2.02E-47 |
| WDR82P1    | ENSG00000 | 0.1  | 3.43    | -2.01  | 1.70E-65 |
| PCCA-AS1   | ENSG00000 | 0    | 8.31    | -3.219 | 4.67E-55 |
| RP11-262F  | ENSG00000 | 0.22 | 8.61    | -2.978 | 6.85E-37 |
| RP1-92O1   | ENSG00000 | 0.32 | 5.3     | -2.255 | 7.88E-70 |
| RP11-166E  | ENSG00000 | 3.37 | 37.049  | -3.122 | 4.83E-70 |
| FAM170B    | ENSG00000 | 0    | 6.89    | -2.98  | 2.01E-58 |
| RP11-272F  | ENSG00000 | 0.12 | 3.52    | -2.013 | 2.63E-53 |
| LINC01052  | ENSG00000 | 0    | 7.15    | -3.027 | 1.83E-55 |
| RFTN1P1    | ENSG00000 | 0    | 5.42    | -2.683 | 1.08E-54 |
| RP11-526F  | ENSG00000 | 0.01 | 8.59    | -3.247 | 7.23E-57 |
| SLIT1-AS1  | ENSG00000 | 0    | 41.781  | -5.419 | 2.21E-65 |
| RP11-547C  | ENSG00000 | 0    | 13.72   | -3.88  | 8.04E-60 |
| SOX9-AS1   | ENSG00000 | 0.11 | 9.06    | -3.18  | 3.45E-79 |
| RP11-85O   | ENSG00000 | 0    | 8.05    | -3.178 | 2.30E-55 |
| GRID1-AS1  | ENSG00000 | 0    | 12.79   | -3.786 | 2.17E-66 |
| GTF3C2-AS1 | ENSG00000 | 0.57 | 42.311  | -4.786 | 4.38E-83 |
| RP11-328K  | ENSG00000 | 0    | 4.84    | -2.546 | 4.02E-63 |
| LINC00700  | ENSG00000 | 0    | 6.54    | -2.915 | 1.53E-50 |
| RP11-347I  | ENSG00000 | 0    | 11.57   | -3.652 | 7.42E-60 |
| RP11-272J  | ENSG00000 | 0    | 8.98    | -3.319 | 5.26E-57 |
| RP11-611I  | ENSG00000 | 0.42 | 5.33    | -2.156 | 3.38E-98 |
| GAPDHP52   | ENSG00000 | 0.03 | 5.27    | -2.606 | 7.59E-55 |
| ID2-AS1    | ENSG00000 | 0.12 | 4.1     | -2.187 | 4.43E-43 |
| SETP9      | ENSG00000 | 0.06 | 3.31    | -2.024 | 5.13E-50 |

|            |           |       |        |        |          |
|------------|-----------|-------|--------|--------|----------|
| ZSCAN31    | ENSG00000 | 2.18  | 34.58  | -3.484 | 2.30E-59 |
| RP3-417L2  | ENSG00000 | 0     | 24.271 | -4.659 | 1.09E-69 |
| RP11-374F  | ENSG00000 | 0.05  | 10.33  | -3.432 | 1.08E-56 |
| TMEM30C    | ENSG00000 | 0.07  | 3.59   | -2.101 | 9.17E-45 |
| LINC01440  | ENSG00000 | 0     | 6.14   | -2.836 | 1.75E-48 |
| SMIM1      | ENSG00000 | 3.66  | 54.198 | -3.566 | 1.88E-72 |
| PPP1R3E    | ENSG00000 | 2.94  | 44.891 | -3.542 | 3.93E-96 |
| LINC01525  | ENSG00000 | 0     | 5.2    | -2.632 | 1.62E-61 |
| RP11-121F  | ENSG00000 | 0     | 3.99   | -2.319 | 1.74E-40 |
| FAM83C-A   | ENSG00000 | 0.13  | 5.08   | -2.428 | 1.15E-49 |
| SMIM2-IT1  | ENSG00000 | 0     | 7.03   | -3.005 | 4.37E-61 |
| RP11-399E  | ENSG00000 | 0     | 58.858 | -5.903 | 1.34E-80 |
| LINC00961  | ENSG00000 | 0.3   | 9.21   | -2.973 | 1.46E-88 |
| RP11-397C  | ENSG00000 | 0     | 3.62   | -2.208 | 3.52E-41 |
| TOPORS-A   | ENSG00000 | 10.22 | 46.061 | -2.068 | 1.17E-52 |
| RP5-928E2  | ENSG00000 | 0     | 4.34   | -2.417 | 2.45E-57 |
| NEURL1-A1  | ENSG00000 | 0     | 6      | -2.807 | 9.21E-57 |
| UBE2R2-A1  | ENSG00000 | 0.04  | 4.4    | -2.376 | 2.17E-57 |
| JARID2-AS1 | ENSG00000 | 0.18  | 62.331 | -5.746 | 4.85E-75 |
| RP4-639F2  | ENSG00000 | 1.41  | 20.281 | -3.142 | 9.52E-66 |
| HIPK1-AS1  | ENSG00000 | 0.2   | 7.65   | -2.85  | 4.66E-79 |
| LINC00533  | ENSG00000 | 0     | 3.39   | -2.134 | 8.71E-59 |
| LINC00494  | ENSG00000 | 0.14  | 13.28  | -3.647 | 3.68E-55 |
| RNF148     | ENSG00000 | 0.04  | 60.141 | -5.877 | 4.02E-70 |
| MIR670HG   | ENSG00000 | 0     | 10.43  | -3.515 | 1.48E-76 |
| LINC00993  | ENSG00000 | 0     | 5.65   | -2.733 | 3.21E-76 |
| LINC00894  | ENSG00000 | 1.01  | 13.7   | -2.871 | 2.64E-78 |
| RP11-342M  | ENSG00000 | 0     | 17.09  | -4.177 | 3.07E-56 |
| RP11-436I1 | ENSG00000 | 0     | 17.28  | -4.192 | 2.94E-67 |
| RP11-634E  | ENSG00000 | 0.04  | 3.45   | -2.097 | 2.80E-62 |
| RP11-73M   | ENSG00000 | 0.11  | 8.13   | -3.04  | 3.99E-94 |
| LINC00837  | ENSG00000 | 0.41  | 16.959 | -3.671 | 2.05E-52 |
| RP11-338C  | ENSG00000 | 0     | 6.56   | -2.918 | 4.09E-54 |
| TSPEAR-A1  | ENSG00000 | 0.25  | 4.22   | -2.062 | 9.61E-50 |
| TM4SF19-1  | ENSG00000 | 0.3   | 9.25   | -2.979 | 6.52E-80 |
| MACROD2    | ENSG00000 | 0     | 28.489 | -4.882 | 9.10E-68 |
| LINC01553  | ENSG00000 | 0     | 9.51   | -3.394 | 3.02E-57 |
| UBOX5-AS1  | ENSG00000 | 0.03  | 4.01   | -2.282 | 3.24E-58 |
| MORC2-A1   | ENSG00000 | 0.32  | 56.23  | -5.438 | 9.41E-76 |
| PRRX2-AS1  | ENSG00000 | 0     | 35.041 | -5.172 | 2.16E-65 |
| LINC00445  | ENSG00000 | 0     | 11.36  | -3.628 | 3.14E-58 |
| LL22NC03-1 | ENSG00000 | 0     | 6.78   | -2.96  | 1.57E-47 |
| LINC01069  | ENSG00000 | 0     | 4.88   | -2.556 | 4.16E-50 |
| MIR7515H1  | ENSG00000 | 0     | 68.18  | -6.112 | 6.64E-70 |
| SLC25A3P1  | ENSG00000 | 0.27  | 16.37  | -3.774 | 1.74E-63 |
| Z82214.3   | ENSG00000 | 0     | 13.44  | -3.852 | 2.44E-95 |
| RP5-1099E  | ENSG00000 | 0     | 3.78   | -2.257 | 1.56E-45 |
| RP11-340I1 | ENSG00000 | 0     | 6.15   | -2.838 | 1.25E-61 |
| MRGPRG-1   | ENSG00000 | 0     | 11.37  | -3.629 | 3.77E-61 |

|           |           |       |         |        |           |
|-----------|-----------|-------|---------|--------|-----------|
| LINC01241 | ENSG0000I | 0     | 5       | -2.585 | 3.33E-45  |
| RP3-430A1 | ENSG0000I | 0     | 12.5    | -3.755 | 5.45E-63  |
| LINC00854 | ENSG0000I | 1.74  | 148.137 | -5.766 | 2.02E-68  |
| RP11-307C | ENSG0000I | 0     | 4.62    | -2.491 | 2.59E-51  |
| LINC01134 | ENSG0000I | 0.24  | 7.31    | -2.745 | 5.02E-69  |
| TSPY10    | ENSG0000I | 0.57  | 19.49   | -3.706 | 1.15E-06  |
| RP11-79M  | ENSG0000I | 0.07  | 3.34    | -2.02  | 2.11E-50  |
| RP11-107M | ENSG0000I | 0.31  | 4.64    | -2.106 | 1.02E-49  |
| UBE2L5P   | ENSG0000I | 0.33  | 45.402  | -5.125 | 4.31E-81  |
| LINC00608 | ENSG0000I | 0     | 45.521  | -5.54  | 4.61E-71  |
| LINC00427 | ENSG0000I | 0     | 5.51    | -2.703 | 5.69E-60  |
| KCNMA1-1  | ENSG0000I | 0.01  | 3.63    | -2.197 | 4.47E-54  |
| RP11-66A2 | ENSG0000I | 0     | 5.95    | -2.797 | 5.66E-58  |
| KLF2P4    | ENSG0000I | 0.18  | 4.93    | -2.329 | 7.78E-51  |
| LINC01424 | ENSG0000I | 0.33  | 9.06    | -2.919 | 2.62E-70  |
| RP1-125I3 | ENSG0000I | 0     | 15.5    | -4.044 | 2.80E-29  |
| RP13-254E | ENSG0000I | 0.37  | 15.93   | -3.627 | 2.98E-53  |
| STARD13-1 | ENSG0000I | 0.08  | 35.879  | -5.094 | 4.44E-74  |
| LINC00347 | ENSG0000I | 0     | 32.96   | -5.086 | 8.89E-68  |
| RPL23AP24 | ENSG0000I | 0     | 5.52    | -2.705 | 1.88E-21  |
| LINC01010 | ENSG0000I | 0.11  | 10.69   | -3.397 | 7.09E-39  |
| RP11-478F | ENSG0000I | 0     | 5.84    | -2.774 | 1.55E-47  |
| GAGE12B   | ENSG0000I | 0     | 183.915 | -7.531 | 4.06E-28  |
| RP11-168F | ENSG0000I | 0     | 5.21    | -2.635 | 8.40E-47  |
| INTS6-AS1 | ENSG0000I | 1.45  | 23.321  | -3.311 | 1.10E-115 |
| RP11-383C | ENSG0000I | 0     | 5.13    | -2.616 | 2.29E-45  |
| RP11-978I | ENSG0000I | 0     | 4.29    | -2.403 | 2.55E-48  |
| RP11-535C | ENSG0000I | 0     | 3.34    | -2.118 | 9.39E-55  |
| LINC00614 | ENSG0000I | 0.05  | 15.06   | -3.935 | 6.20E-63  |
| RP11-544F | ENSG0000I | 0     | 12.31   | -3.734 | 2.09E-58  |
| ZEB1-AS1  | ENSG0000I | 2.11  | 17.111  | -2.542 | 1.85E-67  |
| NDUFA6-A  | ENSG0000I | 4.27  | 51.399  | -3.314 | 2.60E-69  |
| PRMT5-AS  | ENSG0000I | 0.59  | 16.36   | -3.449 | 1.18E-81  |
| RP4-669L1 | ENSG0000I | 21.12 | 143.419 | -2.707 | 9.68E-35  |
| RP11-415E | ENSG0000I | 0.08  | 8.56    | -3.146 | 5.54E-49  |
| NR2F1-AS1 | ENSG0000I | 1.36  | 20.381  | -3.179 | 2.28E-51  |
| ZNF295-A1 | ENSG0000I | 0.1   | 34.82   | -5.025 | 4.92E-49  |
| RP11-402F | ENSG0000I | 0.11  | 8.75    | -3.135 | 4.79E-59  |
| LINC00851 | ENSG0000I | 0     | 28.509  | -4.883 | 2.95E-68  |
| GS1-124K1 | ENSG0000I | 3.63  | 59.821  | -3.715 | 2.04E-69  |
| SYP-AS1   | ENSG0000I | 0     | 3.56    | -2.189 | 1.17E-46  |
| RP11-473M | ENSG0000I | 0.4   | 7.3     | -2.568 | 1.04E-21  |
| LINC01304 | ENSG0000I | 0     | 40.29   | -5.368 | 1.16E-67  |
| PRSS56    | ENSG0000I | 0.01  | 3.25    | -2.073 | 1.84E-42  |
| LINC01522 | ENSG0000I | 0     | 5.14    | -2.618 | 1.32E-56  |
| RP11-147C | ENSG0000I | 0     | 32.59   | -5.07  | 2.39E-65  |
| RP11-67L3 | ENSG0000I | 0     | 8.57    | -3.259 | 5.44E-57  |
| LINC01351 | ENSG0000I | 0.24  | 5.48    | -2.386 | 5.24E-33  |
| RP11-280C | ENSG0000I | 0.04  | 10.02   | -3.406 | 5.14E-60  |

|            |           |      |        |        |           |
|------------|-----------|------|--------|--------|-----------|
| RP11-206L  | ENSG00000 | 1.63 | 29.13  | -3.518 | 2.36E-85  |
| LINC01514  | ENSG00000 | 0    | 4.39   | -2.43  | 3.11E-51  |
| RP11-112L  | ENSG00000 | 0.21 | 9      | -3.047 | 3.21E-64  |
| RP11-343F  | ENSG00000 | 0.29 | 22.441 | -4.184 | 1.14E-71  |
| OXCT2P1    | ENSG00000 | 0.46 | 22.99  | -4.038 | 5.52E-82  |
| RP11-406A  | ENSG00000 | 0    | 3.53   | -2.18  | 1.21E-46  |
| RP11-690I  | ENSG00000 | 0.36 | 8.97   | -2.874 | 2.78E-81  |
| ERICH1-AS1 | ENSG00000 | 0.05 | 15.87  | -4.006 | 5.79E-75  |
| HCG4P3     | ENSG00000 | 0.69 | 7.17   | -2.273 | 6.19E-47  |
| TEX36-AS1  | ENSG00000 | 0    | 42.229 | -5.434 | 6.54E-66  |
| RP3-400B1  | ENSG00000 | 0    | 3.82   | -2.269 | 4.37E-47  |
| RP3-453P2  | ENSG00000 | 0    | 9.04   | -3.328 | 2.23E-58  |
| RP11-483E  | ENSG00000 | 0    | 24.939 | -4.697 | 3.61E-75  |
| NFIA-AS1   | ENSG00000 | 0    | 60.249 | -5.937 | 8.77E-67  |
| RP1-63G5   | ENSG00000 | 0.02 | 33.941 | -5.098 | 6.30E-68  |
| LINC01430  | ENSG00000 | 0    | 13.02  | -3.809 | 2.87E-62  |
| RP11-181E  | ENSG00000 | 0    | 7.26   | -3.046 | 6.48E-50  |
| KCNQ1DN    | ENSG00000 | 0    | 5.05   | -2.597 | 2.24E-54  |
| RP11-443E  | ENSG00000 | 0.22 | 6.51   | -2.622 | 6.64E-61  |
| RP11-38C1  | ENSG00000 | 0    | 10.29  | -3.497 | 2.36E-50  |
| PAGR1      | ENSG00000 | 5.04 | 54.089 | -3.189 | 1.24E-105 |
| SPATA3-AS1 | ENSG00000 | 0.13 | 75.792 | -6.087 | 2.42E-68  |
| TSPY6P     | ENSG00000 | 0.9  | 27.839 | -3.924 | 1.65E-08  |
| GOLGA2P5   | ENSG00000 | 1.79 | 31.979 | -3.563 | 3.93E-66  |
| LINC01589  | ENSG00000 | 0.06 | 14.09  | -3.831 | 1.39E-52  |
| RP11-420L  | ENSG00000 | 0    | 9.5    | -3.392 | 2.21E-58  |
| RP11-252M  | ENSG00000 | 0    | 12.14  | -3.716 | 2.19E-56  |
| PAXBP1-AS1 | ENSG00000 | 0.39 | 5.07   | -2.127 | 3.13E-88  |
| MPC1L      | ENSG00000 | 1.11 | 18.68  | -3.221 | 7.90E-39  |
| RP13-210C  | ENSG00000 | 0    | 21.591 | -4.498 | 1.07E-64  |
| MYO5BP2    | ENSG00000 | 0    | 8.71   | -3.279 | 1.29E-56  |
| PAGE2B     | ENSG00000 | 1.06 | 70.18  | -5.111 | 5.22E-63  |
| HOMER2P2   | ENSG00000 | 0.1  | 7.25   | -2.907 | 1.17E-38  |
| TBC1D3P1   | ENSG00000 | 0    | 12.15  | -3.717 | 8.02E-71  |
| SNORD97    | ENSG00000 | 0    | 3.58   | -2.195 | 1.76E-03  |
| RP11-379K  | ENSG00000 | 0.1  | 4.36   | -2.285 | 2.17E-62  |
| RP11-400L  | ENSG00000 | 0.06 | 16.62  | -4.055 | 3.98E-70  |
| RPS17P15   | ENSG00000 | 0    | 7.57   | -3.099 | 9.83E-56  |
| RP4-584D   | ENSG00000 | 0.1  | 32.751 | -4.939 | 2.72E-62  |
| RP11-634E  | ENSG00000 | 0    | 3.24   | -2.084 | 6.67E-49  |
| POM121L7   | ENSG00000 | 0.01 | 42.291 | -5.422 | 2.08E-79  |
| LINC01210  | ENSG00000 | 0    | 32.05  | -5.047 | 1.86E-72  |
| MYLK-AS1   | ENSG00000 | 0.9  | 11.31  | -2.696 | 1.45E-82  |
| LINC00879  | ENSG00000 | 0.25 | 4.94   | -2.249 | 8.46E-40  |
| RP11-88I2  | ENSG00000 | 1.12 | 7.67   | -2.032 | 1.75E-27  |
| MEIKIN     | ENSG00000 | 0.22 | 12.15  | -3.43  | 3.09E-84  |
| MYADML     | ENSG00000 | 0    | 17.759 | -4.23  | 1.54E-71  |
| RP11-295F  | ENSG00000 | 6.24 | 45.679 | -2.689 | 2.99E-70  |
| RP11-65N   | ENSG00000 | 0    | 4.86   | -2.551 | 4.64E-71  |

|            |           |      |         |        |           |
|------------|-----------|------|---------|--------|-----------|
| RP11-789F  | ENSG00000 | 0    | 4.91    | -2.563 | 7.60E-50  |
| RP11-446F  | ENSG00000 | 0.11 | 5.38    | -2.523 | 5.69E-121 |
| IGSF11-AS  | ENSG00000 | 0    | 30.17   | -4.962 | 3.05E-65  |
| LINC01471  | ENSG00000 | 0    | 6.24    | -2.856 | 3.85E-67  |
| RP11-169M  | ENSG00000 | 0    | 7.63    | -3.109 | 4.56E-60  |
| RP11-293A  | ENSG00000 | 0.68 | 70.35   | -5.408 | 5.27E-75  |
| TEX35      | ENSG00000 | 0.05 | 152.165 | -7.189 | 9.05E-72  |
| RP1-93H18  | ENSG00000 | 0.06 | 8.7     | -3.194 | 1.95E-71  |
| SMKR1      | ENSG00000 | 3.88 | 307.639 | -5.983 | 5.20E-58  |
| RP11-379F  | ENSG00000 | 0.47 | 14.4    | -3.389 | 3.72E-66  |
| RP11-758F  | ENSG00000 | 0    | 85.662  | -6.437 | 1.83E-77  |
| RP11-430C  | ENSG00000 | 0.45 | 4.87    | -2.017 | 1.58E-68  |
| RP11-146E  | ENSG00000 | 0.33 | 20.21   | -3.995 | 2.60E-100 |
| FAR2P3     | ENSG00000 | 2.28 | 47.11   | -3.875 | 7.95E-59  |
| TCAM1P     | ENSG00000 | 0.16 | 30.721  | -4.773 | 2.49E-86  |
| LA16c-306  | ENSG00000 | 0.04 | 10.59   | -3.478 | 2.28E-76  |
| RP11-206L  | ENSG00000 | 0.34 | 4.4     | -2.011 | 1.31E-11  |
| SPATA31D   | ENSG00000 | 0    | 11.37   | -3.629 | 1.98E-61  |
| RN7SL860F  | ENSG00000 | 0    | 9.18    | -3.348 | 2.39E-35  |
| LRRD1      | ENSG00000 | 0.04 | 11.37   | -3.572 | 1.58E-60  |
| KRBOX1     | ENSG00000 | 1.48 | 271.949 | -6.782 | 1.72E-93  |
| PLCXD2-A1  | ENSG00000 | 0    | 4.71    | -2.513 | 6.76E-53  |
| RP5-1002M  | ENSG00000 | 0    | 6.16    | -2.84  | 1.94E-47  |
| NSUN6      | ENSG00000 | 5.66 | 29.691  | -2.204 | 3.86E-81  |
| RP11-639E  | ENSG00000 | 0    | 32.43   | -5.063 | 2.63E-59  |
| RP11-147I  | ENSG00000 | 0.92 | 9.6     | -2.465 | 4.21E-50  |
| IQCJ-SCHI  | ENSG00000 | 0    | 6.44    | -2.895 | 4.78E-50  |
| RP11-768C  | ENSG00000 | 0    | 15.48   | -4.043 | 1.47E-65  |
| RP11-342M  | ENSG00000 | 0    | 7.98    | -3.167 | 2.19E-63  |
| LINC01487  | ENSG00000 | 0    | 11.31   | -3.622 | 6.62E-58  |
| LINC01192  | ENSG00000 | 0    | 12.72   | -3.778 | 3.45E-57  |
| RP11-545C  | ENSG00000 | 0.45 | 189.216 | -7.035 | 3.18E-51  |
| LINC00635  | ENSG00000 | 0.01 | 28      | -4.844 | 1.65E-65  |
| PTPRG-AS1  | ENSG00000 | 2.54 | 15.55   | -2.225 | 3.14E-62  |
| SSX2       | ENSG00000 | 0.09 | 27.131  | -4.69  | 2.21E-51  |
| IDS        | ENSG00000 | 0.94 | 11.15   | -2.647 | 8.42E-47  |
| RP11-6F25  | ENSG00000 | 0    | 6.93    | -2.987 | 2.40E-56  |
| ZBTB20-AS1 | ENSG00000 | 0.11 | 60.012  | -5.78  | 2.14E-70  |
| PAQR9-AS   | ENSG00000 | 0.11 | 4.8     | -2.385 | 1.37E-39  |
| PRICKLE2-1 | ENSG00000 | 0    | 4.88    | -2.556 | 9.92E-51  |
| RN7SL484F  | ENSG00000 | 0    | 3.8     | -2.263 | 8.20E-23  |
| INMT       | ENSG00000 | 2.25 | 17.37   | -2.499 | 3.20E-27  |
| TMEM239    | ENSG00000 | 0.02 | 17.13   | -4.152 | 4.29E-65  |
| RP11-420J  | ENSG00000 | 0    | 7.63    | -3.109 | 1.21E-56  |
| SUMO1P1    | ENSG00000 | 2.15 | 15      | -2.345 | 1.60E-28  |
| FABP5P3    | ENSG00000 | 0.23 | 6.08    | -2.525 | 5.22E-53  |
| LINC00893  | ENSG00000 | 1.05 | 26.921  | -3.768 | 7.94E-90  |
| LA16c-3G1  | ENSG00000 | 0.04 | 4.34    | -2.36  | 2.76E-68  |
| RP11-690C  | ENSG00000 | 0    | 6.35    | -2.878 | 1.64E-51  |



|            |           |       |         |        |           |
|------------|-----------|-------|---------|--------|-----------|
| RP11-520I  | ENSG0000I | 0     | 11.04   | -3.59  | 4.75E-53  |
| TCP10L     | ENSG0000I | 0.32  | 257.244 | -7.612 | 2.32E-87  |
| PVRL3-AS1  | ENSG0000I | 0.23  | 13.76   | -3.585 | 2.94E-80  |
| STAG3L5P   | ENSG0000I | 10.78 | 95.121  | -3.029 | 2.32E-66  |
| NPPA-AS1   | ENSG0000I | 2.66  | 42.329  | -3.565 | 2.34E-69  |
| LINC00901  | ENSG0000I | 0     | 9.69    | -3.418 | 3.14E-58  |
| RBMV1E     | ENSG0000I | 0     | 3.6     | -2.202 | 7.65E-55  |
| GTF2A1L    | ENSG0000I | 0.13  | 48.88   | -5.464 | 1.50E-84  |
| RP3-477O   | ENSG0000I | 0     | 7.89    | -3.152 | 2.38E-58  |
| LINC01206  | ENSG0000I | 0.01  | 18.301  | -4.256 | 1.06E-79  |
| RGAG4      | ENSG0000I | 1.87  | 10.51   | -2.004 | 2.79E-27  |
| LINC00882  | ENSG0000I | 0.56  | 30.471  | -4.334 | 3.84E-96  |
| GLYCTK-AS1 | ENSG0000I | 0.26  | 8.32    | -2.887 | 1.06E-53  |
| SOX2-OT    | ENSG0000I | 0.49  | 6.44    | -2.32  | 1.52E-48  |
| ZNF709     | ENSG0000I | 2.48  | 20.05   | -2.597 | 4.23E-49  |
| STRC       | ENSG0000I | 0.19  | 18.29   | -4.019 | 1.04E-109 |
| RP11-118M  | ENSG0000I | 0.13  | 6.4     | -2.711 | 2.25E-69  |
| PLCH1-AS1  | ENSG0000I | 0     | 3.52    | -2.176 | 1.82E-50  |
| RP11-446F  | ENSG0000I | 0     | 18.47   | -4.283 | 7.41E-72  |
| RP11-556M  | ENSG0000I | 0.65  | 9.19    | -2.627 | 2.61E-71  |
| RPS11P6    | ENSG0000I | 0.16  | 28.889  | -4.687 | 2.53E-77  |
| FTH1P18    | ENSG0000I | 0     | 5.58    | -2.718 | 3.38E-62  |
| RP11-12M   | ENSG0000I | 0     | 27.41   | -4.828 | 7.96E-69  |
| RP11-538F  | ENSG0000I | 0     | 12.82   | -3.789 | 4.55E-73  |
| RP11-550I  | ENSG0000I | 0.32  | 4.96    | -2.175 | 1.61E-72  |
| TUSC7      | ENSG0000I | 0     | 15.82   | -4.072 | 3.46E-64  |
| LINC00359  | ENSG0000I | 0     | 3.15    | -2.053 | 1.77E-65  |
| FGF14-IT1  | ENSG0000I | 0.02  | 6.98    | -2.968 | 1.60E-64  |
| PTPRVP     | ENSG0000I | 0.15  | 9.4     | -3.177 | 1.07E-94  |
| RP11-445M  | ENSG0000I | 0     | 3.76    | -2.251 | 2.08E-54  |
| NAT6       | ENSG0000I | 9.03  | 86.617  | -3.127 | 1.45E-67  |
| WFDC6      | ENSG0000I | 0.38  | 48.411  | -5.162 | 1.39E-80  |
| LINC01214  | ENSG0000I | 0     | 7.02    | -3.004 | 4.22E-52  |
| UPK3B      | ENSG0000I | 0.32  | 4.94    | -2.17  | 4.27E-24  |
| RP11-264K  | ENSG0000I | 0     | 4.71    | -2.513 | 1.04E-45  |
| RP11-164C  | ENSG0000I | 0     | 6.96    | -2.993 | 4.06E-73  |
| ZNF487     | ENSG0000I | 2.48  | 32.981  | -3.288 | 4.01E-63  |
| RP11-307F  | ENSG0000I | 0     | 42.379  | -5.439 | 2.02E-71  |
| TIPARP-AS1 | ENSG0000I | 1.5   | 59.85   | -4.605 | 4.74E-72  |
| GSTA1      | ENSG0000I | 3.53  | 175.593 | -5.285 | 6.96E-44  |
| RGAG1      | ENSG0000I | 0.3   | 9       | -2.943 | 1.69E-87  |
| RP11-368M  | ENSG0000I | 0.63  | 13.48   | -3.151 | 8.86E-36  |
| RP1-300I2  | ENSG0000I | 0     | 5.36    | -2.669 | 1.16E-77  |
| IL12A-AS1  | ENSG0000I | 0.02  | 3.43    | -2.119 | 1.54E-47  |
| RN7SL417F  | ENSG0000I | 0     | 3.07    | -2.025 | 5.96E-37  |
| MARK2P17   | ENSG0000I | 0     | 3.66    | -2.22  | 7.29E-69  |
| GSTA2      | ENSG0000I | 2.2   | 36.59   | -3.554 | 1.30E-33  |
| FLNB-AS1   | ENSG0000I | 0.34  | 5.42    | -2.26  | 2.94E-64  |
| FOXP1-AS1  | ENSG0000I | 0     | 6.61    | -2.928 | 2.92E-53  |

|           |           |        |         |        |           |
|-----------|-----------|--------|---------|--------|-----------|
| ZFAND6P1  | ENSG00000 | 0      | 6.5     | -2.907 | 4.24E-64  |
| GS1-259H  | ENSG00000 | 1.11   | 195.563 | -6.542 | 4.71E-87  |
| LINC01330 | ENSG00000 | 0      | 10.86   | -3.568 | 1.26E-47  |
| GMCL1P1   | ENSG00000 | 0      | 7.56    | -3.098 | 8.38E-70  |
| PKD1P1    | ENSG00000 | 1.38   | 12.87   | -2.543 | 3.43E-22  |
| PEX5L-AS2 | ENSG00000 | 0      | 28.47   | -4.881 | 5.10E-59  |
| RP11-734K | ENSG00000 | 0      | 6.64    | -2.934 | 7.27E-59  |
| HDAC11-1  | ENSG00000 | 0.08   | 5.34    | -2.553 | 8.58E-56  |
| RP4-800G7 | ENSG00000 | 1.94   | 34.329  | -3.587 | 5.30E-105 |
| RP11-14D2 | ENSG00000 | 0      | 3.57    | -2.192 | 1.39E-49  |
| RAD21L1   | ENSG00000 | 0.22   | 8.71    | -2.993 | 2.69E-58  |
| HBB       | ENSG00000 | 4.5    | 51.399  | -3.252 | 2.70E-06  |
| LIFR-AS1  | ENSG00000 | 0.39   | 4.81    | -2.063 | 6.44E-63  |
| RP11-181C | ENSG00000 | 0.57   | 5.65    | -2.083 | 3.03E-56  |
| RP11-320M | ENSG00000 | 0.01   | 8.2     | -3.187 | 2.64E-53  |
| LINC01024 | ENSG00000 | 1.52   | 14.95   | -2.662 | 9.86E-55  |
| RNF139-AS | ENSG00000 | 1.14   | 10.56   | -2.433 | 5.49E-105 |
| RP11-10K1 | ENSG00000 | 0.36   | 6.22    | -2.408 | 7.30E-82  |
| USP2-AS1  | ENSG00000 | 0.88   | 26.31   | -3.861 | 3.33E-60  |
| RP11-15B1 | ENSG00000 | 0.09   | 5.15    | -2.496 | 1.84E-75  |
| RP11-367J | ENSG00000 | 0.13   | 9.75    | -3.25  | 9.66E-73  |
| NEAT1     | ENSG00000 | 78.302 | 381.171 | -2.269 | 7.47E-30  |
| RORA-AS1  | ENSG00000 | 0.47   | 8.62    | -2.71  | 6.31E-52  |
| RP11-712E | ENSG00000 | 0.73   | 30.33   | -4.179 | 1.26E-99  |
| GS1-24F42 | ENSG00000 | 0.16   | 15.5    | -3.83  | 9.22E-60  |
| FLJ21408  | ENSG00000 | 0.39   | 9.42    | -2.906 | 8.24E-71  |
| RP11-796E | ENSG00000 | 0.54   | 8.39    | -2.608 | 2.01E-70  |
| RP11-33B1 | ENSG00000 | 9.69   | 51.71   | -2.302 | 1.96E-62  |
| LINC01513 | ENSG00000 | 0      | 4.43    | -2.441 | 1.73E-55  |
| RAB30-AS  | ENSG00000 | 5.38   | 34.36   | -2.47  | 7.01E-66  |
| RP11-696M | ENSG00000 | 1.11   | 10.14   | -2.4   | 1.26E-44  |
| LINC01096 | ENSG00000 | 0.13   | 38.529  | -5.129 | 6.17E-66  |
| RP11-260E | ENSG00000 | 0.03   | 3.29    | -2.058 | 2.41E-59  |
| PRR7-AS1  | ENSG00000 | 0.3    | 10.41   | -3.134 | 8.38E-64  |
| EXTL3-AS1 | ENSG00000 | 0.39   | 10.66   | -3.068 | 2.59E-93  |
| LACTB2-AS | ENSG00000 | 0.33   | 5.69    | -2.331 | 3.92E-54  |
| RP11-461C | ENSG00000 | 0.2    | 17.08   | -3.913 | 5.61E-80  |
| RP11-386H | ENSG00000 | 0.07   | 4.74    | -2.423 | 1.91E-65  |
| RP11-1277 | ENSG00000 | 0.54   | 11.14   | -2.979 | 3.04E-83  |
| LINC00535 | ENSG00000 | 0.2    | 7.5     | -2.824 | 7.56E-68  |
| RASSF8-AS | ENSG00000 | 2.15   | 16.04   | -2.436 | 4.17E-26  |
| H2AFJ     | ENSG00000 | 57.11  | 744.639 | -3.682 | 3.71E-47  |
| RGMB-AS1  | ENSG00000 | 1.41   | 90.202  | -5.242 | 7.21E-66  |
| RP11-325M | ENSG00000 | 0.03   | 5.42    | -2.64  | 3.42E-78  |
| RP1-179N  | ENSG00000 | 0.52   | 20.72   | -3.837 | 2.15E-104 |
| RP11-588C | ENSG00000 | 0      | 9.43    | -3.383 | 7.65E-60  |
| RP11-727A | ENSG00000 | 2.51   | 17.34   | -2.385 | 1.03E-95  |
| RP11-637A | ENSG00000 | 0.71   | 9.74    | -2.651 | 3.63E-56  |
| SPTY2D1-1 | ENSG00000 | 0.51   | 481.135 | -8.319 | 1.65E-83  |

|           |           |         |         |        |           |
|-----------|-----------|---------|---------|--------|-----------|
| RP11-1277 | ENSG00000 | 0.58    | 13.5    | -3.198 | 9.62E-107 |
| RP11-404k | ENSG00000 | 0       | 19.22   | -4.338 | 1.07E-52  |
| RP11-103J | ENSG00000 | 0       | 6.68    | -2.941 | 1.95E-60  |
| FOXD1-AS  | ENSG00000 | 0.54    | 8.37    | -2.605 | 9.14E-34  |
| NRAV      | ENSG00000 | 2.58    | 60.459  | -4.102 | 2.39E-67  |
| INSL3     | ENSG00000 | 1.26    | 203.487 | -6.5   | 1.11E-38  |
| SLIT2-IT1 | ENSG00000 | 0       | 35.941  | -5.207 | 2.27E-67  |
| LINC00616 | ENSG00000 | 0       | 11.65   | -3.661 | 2.13E-60  |
| MEF2C-AS  | ENSG00000 | 0.57    | 6.84    | -2.32  | 3.31E-77  |
| RP11-366f | ENSG00000 | 0       | 4.04    | -2.333 | 4.46E-81  |
| RP11-313E | ENSG00000 | 0.17    | 13.53   | -3.634 | 1.05E-47  |
| RP11-503f | ENSG00000 | 0       | 21.47   | -4.49  | 4.82E-67  |
| KB-1269D  | ENSG00000 | 0.1     | 5.44    | -2.55  | 2.52E-60  |
| SEMA6A-7  | ENSG00000 | 1.87    | 11.99   | -2.178 | 5.87E-67  |
| RP11-517E | ENSG00000 | 0.13    | 14      | -3.731 | 3.30E-69  |
| POU5F2    | ENSG00000 | 0.05    | 17.179  | -4.114 | 6.19E-73  |
| MTATP6P1  | ENSG00000 | 600.782 | 2412.31 | -2.004 | 3.94E-28  |
| RP11-201f | ENSG00000 | 0       | 7.06    | -3.011 | 6.07E-56  |
| LINC01339 | ENSG00000 | 0       | 7.68    | -3.118 | 1.92E-50  |
| RP11-844F | ENSG00000 | 0.33    | 113.354 | -6.426 | 9.60E-142 |
| RP11-158f | ENSG00000 | 0       | 8.74    | -3.284 | 3.46E-52  |
| RP11-557J | ENSG00000 | 0       | 9.56    | -3.401 | 5.10E-60  |
| RP11-495k | ENSG00000 | 0.05    | 8.58    | -3.19  | 3.92E-60  |
| RP11-292c | ENSG00000 | 0       | 3.46    | -2.157 | 2.95E-53  |
| WI2-2373f | ENSG00000 | 0       | 30.83   | -4.992 | 7.17E-71  |
| RP11-974F | ENSG00000 | 0.16    | 37.229  | -5.042 | 3.01E-71  |
| LINC01095 | ENSG00000 | 0       | 24.35   | -4.664 | 1.38E-69  |
| RP11-412F | ENSG00000 | 0.3     | 6.67    | -2.561 | 2.22E-28  |
| FLJ46284  | ENSG00000 | 0.05    | 6.79    | -2.891 | 3.65E-64  |
| RP11-344c | ENSG00000 | 0       | 3.45    | -2.154 | 1.35E-49  |
| RP11-58B2 | ENSG00000 | 0       | 3.37    | -2.128 | 5.05E-64  |
| PCNAP1    | ENSG00000 | 0       | 6.13    | -2.834 | 8.63E-60  |
| ZNF436-A9 | ENSG00000 | 1.59    | 16.39   | -2.747 | 8.14E-84  |
| EPPIN-WFf | ENSG00000 | 0.08    | 23.789  | -4.521 | 7.57E-76  |
| RP11-423f | ENSG00000 | 0       | 8.08    | -3.183 | 8.18E-60  |
| RP11-669f | ENSG00000 | 0.16    | 6.74    | -2.738 | 7.40E-60  |
| RP11-428L | ENSG00000 | 0       | 5.44    | -2.687 | 3.16E-44  |
| LINC01088 | ENSG00000 | 0.43    | 8.7     | -2.762 | 2.54E-62  |
| LINC01333 | ENSG00000 | 0       | 9.63    | -3.41  | 4.79E-48  |
| LINC01016 | ENSG00000 | 0.13    | 138.131 | -6.944 | 1.75E-80  |
| RP11-434c | ENSG00000 | 0.03    | 5.26    | -2.603 | 6.46E-83  |
| RP1-27K12 | ENSG00000 | 0.06    | 10.9    | -3.489 | 9.26E-63  |
| RP11-340f | ENSG00000 | 0       | 22.389  | -4.548 | 2.70E-61  |
| RP11-492c | ENSG00000 | 0       | 26.489  | -4.781 | 3.94E-64  |
| RP11-171f | ENSG00000 | 0       | 7.82    | -3.141 | 4.93E-46  |
| SPATS1    | ENSG00000 | 0.23    | 25.251  | -4.416 | 7.00E-58  |
| RP11-496f | ENSG00000 | 0.84    | 11.48   | -2.762 | 4.83E-64  |
| RP11-281F | ENSG00000 | 0       | 16.62   | -4.139 | 3.55E-52  |
| RP11-565f | ENSG00000 | 0       | 3.24    | -2.084 | 7.21E-56  |

|           |           |       |         |        |           |
|-----------|-----------|-------|---------|--------|-----------|
| MIR143HG  | ENSG00000 | 0.25  | 4.27    | -2.076 | 9.12E-25  |
| RP11-279C | ENSG00000 | 0.44  | 6.7     | -2.419 | 1.12E-69  |
| RP11-423F | ENSG00000 | 1     | 14.39   | -2.944 | 2.20E-71  |
| THEGL     | ENSG00000 | 0.07  | 5.92    | -2.693 | 3.00E-57  |
| SRD5A3-A  | ENSG00000 | 1.41  | 27.851  | -3.582 | 1.87E-61  |
| FER1L5    | ENSG00000 | 0.03  | 14.59   | -3.92  | 4.51E-73  |
| RP11-79C6 | ENSG00000 | 0     | 10.88   | -3.57  | 2.20E-61  |
| RP11-346J | ENSG00000 | 0     | 4.29    | -2.403 | 2.14E-54  |
| LINC01377 | ENSG00000 | 0     | 15.27   | -4.024 | 4.28E-59  |
| LINC00964 | ENSG00000 | 0.13  | 39.311  | -5.157 | 2.89E-69  |
| RP11-73G1 | ENSG00000 | 0     | 20.941  | -4.456 | 6.19E-55  |
| RP11-420C | ENSG00000 | 0     | 3.95    | -2.307 | 4.06E-60  |
| RP11-983C | ENSG00000 | 0     | 10.57   | -3.532 | 9.53E-62  |
| RP11-665I | ENSG00000 | 0     | 3.63    | -2.211 | 7.37E-49  |
| RP11-495K | ENSG00000 | 0.02  | 6.09    | -2.797 | 1.19E-46  |
| GOLGA8K   | ENSG00000 | 0.2   | 10.03   | -3.2   | 2.74E-83  |
| RP11-563E | ENSG00000 | 0.1   | 6.24    | -2.719 | 1.69E-42  |
| SLC7A11-1 | ENSG00000 | 0.1   | 10.79   | -3.422 | 3.41E-67  |
| RP11-180C | ENSG00000 | 0.09  | 4.4     | -2.309 | 7.02E-42  |
| RP11-778J | ENSG00000 | 0     | 10.89   | -3.572 | 1.86E-56  |
| YJEFN3    | ENSG00000 | 4.96  | 63.249  | -3.43  | 1.11E-66  |
| RP11-577C | ENSG00000 | 0     | 5.16    | -2.623 | 3.09E-52  |
| RP13-401M | ENSG00000 | 0.89  | 16.7    | -3.227 | 1.13E-54  |
| RP11-417F | ENSG00000 | 0.03  | 5.91    | -2.746 | 7.05E-62  |
| RP4-622L5 | ENSG00000 | 0     | 16.89   | -4.161 | 3.59E-54  |
| RP11-848C | ENSG00000 | 1.01  | 14.43   | -2.94  | 4.32E-58  |
| RP11-700M | ENSG00000 | 0.05  | 10.32   | -3.43  | 7.64E-83  |
| RP11-480C | ENSG00000 | 0     | 5.76    | -2.757 | 1.20E-54  |
| KIAA1210  | ENSG00000 | 0.03  | 25.84   | -4.704 | 2.17E-104 |
| RP11-834C | ENSG00000 | 0.14  | 34.76   | -4.971 | 2.56E-70  |
| WBP1LP2   | ENSG00000 | 0.24  | 4.27    | -2.087 | 1.15E-70  |
| RP4-669L1 | ENSG00000 | 10.16 | 78.08   | -2.825 | 1.29E-35  |
| SMAD1-A9  | ENSG00000 | 0     | 20.32   | -4.414 | 2.91E-60  |
| LINC01511 | ENSG00000 | 0.06  | 7.69    | -3.035 | 3.68E-61  |
| RP11-565A | ENSG00000 | 0.29  | 5.35    | -2.299 | 4.32E-43  |
| ROPN1L-A  | ENSG00000 | 0     | 11.5    | -3.644 | 4.83E-55  |
| RP11-597L | ENSG00000 | 0     | 189.059 | -7.57  | 2.97E-77  |
| RP11-756F | ENSG00000 | 0.07  | 6.43    | -2.796 | 4.60E-67  |
| XXbac-BPC | ENSG00000 | 0     | 3.8     | -2.263 | 6.53E-49  |
| LINC01596 | ENSG00000 | 0     | 16.829  | -4.156 | 7.75E-60  |
| RP11-486L | ENSG00000 | 0.07  | 9.06    | -3.233 | 2.79E-78  |
| RP11-161L | ENSG00000 | 0     | 6.61    | -2.928 | 1.39E-46  |
| RP11-322M | ENSG00000 | 0     | 174.078 | -7.452 | 8.10E-75  |
| NT5C1B-R  | ENSG00000 | 0     | 18.97   | -4.32  | 2.93E-65  |
| RP11-834C | ENSG00000 | 1.68  | 26.7    | -3.37  | 2.91E-27  |
| RP11-386E | ENSG00000 | 0     | 6.58    | -2.922 | 6.78E-55  |
| LINC01365 | ENSG00000 | 0     | 3.72    | -2.239 | 5.55E-50  |
| RP11-91H9 | ENSG00000 | 0     | 10      | -3.459 | 2.05E-57  |
| RP11-11N9 | ENSG00000 | 0     | 3.15    | -2.053 | 4.00E-59  |

|           |           |       |         |        |          |
|-----------|-----------|-------|---------|--------|----------|
| RP11-663F | ENSG00000 | 0     | 4.11    | -2.353 | 1.58E-58 |
| RP11-133E | ENSG00000 | 0     | 8.95    | -3.315 | 8.05E-55 |
| LNX1-AS1  | ENSG00000 | 0     | 12.68   | -3.774 | 2.21E-55 |
| RP11-392E | ENSG00000 | 0.11  | 15.51   | -3.895 | 2.21E-76 |
| HMMR-AS   | ENSG00000 | 0     | 3.93    | -2.302 | 7.27E-48 |
| RP11-535C | ENSG00000 | 0     | 9.37    | -3.374 | 6.49E-58 |
| RP11-100M | ENSG00000 | 0     | 4.13    | -2.359 | 6.50E-45 |
| RP11-115C | ENSG00000 | 0.38  | 5.21    | -2.17  | 4.17E-39 |
| RP11-419C | ENSG00000 | 0     | 4.24    | -2.39  | 2.93E-65 |
| SEPT14P4  | ENSG00000 | 0     | 3.28    | -2.098 | 9.28E-22 |
| RP11-98J2 | ENSG00000 | 0.07  | 26.53   | -4.685 | 1.33E-66 |
| F11-AS1   | ENSG00000 | 0.14  | 25.04   | -4.514 | 7.55E-60 |
| RP11-45L9 | ENSG00000 | 0     | 10.83   | -3.564 | 5.37E-62 |
| LINC01337 | ENSG00000 | 0.1   | 8.05    | -3.04  | 5.77E-77 |
| ZNF345    | ENSG00000 | 3.22  | 33.219  | -3.02  | 6.43E-69 |
| RP11-73G1 | ENSG00000 | 0     | 32.529  | -5.067 | 7.95E-67 |
| RP11-171M | ENSG00000 | 0     | 5.01    | -2.587 | 3.23E-46 |
| RP11-506F | ENSG00000 | 0.08  | 3.59    | -2.087 | 5.59E-51 |
| RP11-506M | ENSG00000 | 0     | 3.59    | -2.199 | 1.72E-48 |
| RP11-328M | ENSG00000 | 0     | 24.729  | -4.685 | 5.24E-75 |
| RP11-420A | ENSG00000 | 0.45  | 5.25    | -2.108 | 7.39E-94 |
| RP11-483A | ENSG00000 | 0     | 4.28    | -2.4   | 3.11E-33 |
| FOXD1     | ENSG00000 | 0.68  | 6.33    | -2.125 | 1.24E-34 |
| RP11-197M | ENSG00000 | 0.01  | 5.23    | -2.625 | 4.25E-55 |
| RP11-572C | ENSG00000 | 0.06  | 5.34    | -2.58  | 3.08E-59 |
| RP11-798K | ENSG00000 | 0     | 11.68   | -3.664 | 6.90E-59 |
| MALAT1    | ENSG00000 | 21.14 | 160.574 | -2.867 | 5.47E-52 |
| RP11-724C | ENSG00000 | 0.12  | 8.14    | -3.029 | 7.04E-57 |
| RP11-6N1K | ENSG00000 | 0.04  | 14.64   | -3.911 | 6.22E-62 |
| RP11-774C | ENSG00000 | 0.08  | 3.8     | -2.152 | 2.94E-47 |
| RP11-128C | ENSG00000 | 0.23  | 4.75    | -2.225 | 3.07E-54 |
| RP11-600L | ENSG00000 | 0     | 4.98    | -2.58  | 4.47E-50 |
| RP11-318M | ENSG00000 | 0     | 8.14    | -3.192 | 8.28E-54 |
| RP11-614F | ENSG00000 | 0.9   | 40.74   | -4.457 | 4.86E-53 |
| RNA5SP21  | ENSG00000 | 0     | 5.6     | -2.722 | 3.11E-04 |
| SCARNA13  | ENSG00000 | 1.07  | 8.17    | -2.147 | 1.34E-60 |
| RP11-219J | ENSG00000 | 0     | 25.27   | -4.715 | 1.17E-67 |
| RP11-17A2 | ENSG00000 | 0     | 6.65    | -2.935 | 3.54E-58 |
| RP11-369E | ENSG00000 | 0     | 13.71   | -3.879 | 1.28E-61 |
| RP11-863K | ENSG00000 | 0     | 16.44   | -4.124 | 1.07E-62 |
| RP11-421F | ENSG00000 | 0     | 8.69    | -3.276 | 1.09E-59 |
| RP11-809C | ENSG00000 | 1.05  | 7.52    | -2.055 | 3.39E-49 |
| RP11-716C | ENSG00000 | 0     | 5.67    | -2.738 | 2.29E-55 |
| RP11-779C | ENSG00000 | 0     | 13.17   | -3.825 | 3.60E-66 |
| LINC01606 | ENSG00000 | 0.12  | 88.818  | -6.325 | 2.61E-90 |
| LINC00293 | ENSG00000 | 0     | 10.49   | -3.522 | 1.29E-54 |
| RP11-261C | ENSG00000 | 1.95  | 32.599  | -3.51  | 8.22E-46 |
| RP11-738C | ENSG00000 | 0     | 12.6    | -3.766 | 1.27E-47 |
| EVX1-AS   | ENSG00000 | 0.79  | 7.21    | -2.197 | 5.16E-17 |

|            |           |      |        |        |          |
|------------|-----------|------|--------|--------|----------|
| RP11-231C  | ENSG00000 | 0.07 | 79.39  | -6.231 | 7.90E-80 |
| RP11-619L  | ENSG00000 | 0    | 26.17  | -4.764 | 9.63E-63 |
| RP11-770E  | ENSG00000 | 0    | 14.18  | -3.924 | 6.25E-70 |
| RP11-697E  | ENSG00000 | 0    | 16.79  | -4.153 | 6.80E-69 |
| LINC01603  | ENSG00000 | 0    | 7.12   | -3.021 | 8.21E-56 |
| RP11-114C  | ENSG00000 | 0    | 3.1    | -2.036 | 4.70E-29 |
| NACA2      | ENSG00000 | 1.43 | 76.622 | -4.997 | 8.66E-65 |
| SEPT10P1   | ENSG00000 | 0.05 | 8.75   | -3.215 | 2.92E-64 |
| RP11-26M   | ENSG00000 | 0    | 4.33   | -2.414 | 2.63E-54 |
| HOXA-AS2   | ENSG00000 | 0.57 | 11.74  | -3.021 | 3.04E-34 |
| RP11-108C  | ENSG00000 | 0    | 30.41  | -4.973 | 6.51E-67 |
| RP11-100L  | ENSG00000 | 0    | 4.83   | -2.543 | 5.50E-54 |
| RP11-536M  | ENSG00000 | 0    | 16.781 | -4.152 | 1.49E-63 |
| RP11-587F  | ENSG00000 | 0    | 4.04   | -2.333 | 6.71E-61 |
| LINCR-000  | ENSG00000 | 0.17 | 4.66   | -2.274 | 1.22E-44 |
| RP11-317M  | ENSG00000 | 0.07 | 6.01   | -2.712 | 5.63E-72 |
| RP11-561E  | ENSG00000 | 0    | 37.439 | -5.264 | 1.10E-67 |
| PRSS51     | ENSG00000 | 0.14 | 4.67   | -2.314 | 8.18E-29 |
| RP11-981C  | ENSG00000 | 0    | 29.331 | -4.923 | 3.27E-64 |
| KB-1410C   | ENSG00000 | 0    | 17.421 | -4.203 | 1.05E-76 |
| RP11-177F  | ENSG00000 | 0.1  | 11.11  | -3.461 | 5.78E-70 |
| RP11-787C  | ENSG00000 | 0    | 7.77   | -3.133 | 1.08E-54 |
| KB-1083B1  | ENSG00000 | 0    | 18.23  | -4.265 | 1.78E-62 |
| RP11-404L  | ENSG00000 | 0    | 25.56  | -4.731 | 2.44E-65 |
| LINC01030  | ENSG00000 | 0.03 | 4.26   | -2.352 | 7.89E-61 |
| RP11-141E  | ENSG00000 | 5.98 | 64.239 | -3.224 | 3.04E-58 |
| RP11-705C  | ENSG00000 | 0    | 3.15   | -2.053 | 1.57E-48 |
| RP11-386C  | ENSG00000 | 0    | 5.89   | -2.784 | 5.16E-55 |
| FER1L6-AS  | ENSG00000 | 0.02 | 3.7    | -2.204 | 5.11E-67 |
| RP11-347C  | ENSG00000 | 0.71 | 6.43   | -2.119 | 2.40E-74 |
| RP11-10A1  | ENSG00000 | 0    | 4.4    | -2.433 | 1.55E-52 |
| IGHVII-44- | ENSG00000 | 0    | 7.74   | -3.128 | 1.27E-33 |
| RP11-410L  | ENSG00000 | 1.45 | 18.46  | -2.99  | 6.11E-73 |
| RP11-4K1E  | ENSG00000 | 0    | 11.48  | -3.642 | 1.06E-63 |
| NRG1-IT1   | ENSG00000 | 0.21 | 29.889 | -4.674 | 2.44E-66 |
| RP11-363E  | ENSG00000 | 0.32 | 68.171 | -5.712 | 9.72E-72 |
| RP11-369E  | ENSG00000 | 0    | 13.52  | -3.86  | 2.35E-62 |
| RP11-150C  | ENSG00000 | 0.04 | 7.48   | -3.027 | 1.69E-78 |
| RP11-705C  | ENSG00000 | 0    | 54.871 | -5.804 | 9.56E-70 |
| RP11-99H   | ENSG00000 | 0    | 4.31   | -2.409 | 1.27E-47 |
| RP11-787C  | ENSG00000 | 0    | 5.37   | -2.671 | 3.55E-55 |
| KB-1043D   | ENSG00000 | 0    | 5.66   | -2.736 | 1.91E-54 |
| RP11-115J  | ENSG00000 | 0.04 | 10.54  | -3.472 | 5.06E-72 |
| RP11-108C  | ENSG00000 | 0    | 6.33   | -2.874 | 4.22E-50 |
| RP11-17A   | ENSG00000 | 0.01 | 5.07   | -2.587 | 7.96E-66 |
| RP11-58O   | ENSG00000 | 0    | 10.34  | -3.503 | 1.24E-49 |
| RP11-24P4  | ENSG00000 | 0    | 5.03   | -2.592 | 1.02E-60 |
| RP11-10A1  | ENSG00000 | 0.36 | 28.58  | -4.443 | 6.94E-52 |
| RP11-628E  | ENSG00000 | 0    | 9.59   | -3.405 | 5.31E-61 |

|             |           |      |        |        |           |
|-------------|-----------|------|--------|--------|-----------|
| RP11-343F   | ENSG00000 | 0    | 3.12   | -2.043 | 2.45E-50  |
| RP11-677I   | ENSG00000 | 0.1  | 8.72   | -3.143 | 1.27E-72  |
| RP11-560C   | ENSG00000 | 0    | 12.89  | -3.796 | 2.14E-60  |
| RP11-755F   | ENSG00000 | 0.55 | 29.97  | -4.321 | 2.36E-87  |
| RP11-380C   | ENSG00000 | 0.53 | 7.48   | -2.47  | 4.40E-63  |
| FBXO3-AS1   | ENSG00000 | 0    | 13.35  | -3.843 | 5.27E-69  |
| RP11-958J   | ENSG00000 | 0    | 14.97  | -3.997 | 2.28E-48  |
| LINC01493   | ENSG00000 | 0    | 3.2    | -2.07  | 5.48E-48  |
| RP1-17K7.2  | ENSG00000 | 0    | 30.93  | -4.997 | 3.78E-71  |
| RP11-395C   | ENSG00000 | 0.87 | 6.76   | -2.053 | 1.27E-40  |
| RP11-354A   | ENSG00000 | 0.09 | 5.97   | -2.677 | 6.97E-80  |
| RP11-141E   | ENSG00000 | 0.89 | 13.88  | -2.977 | 3.75E-48  |
| RP11-680E   | ENSG00000 | 0.02 | 3.14   | -2.021 | 4.00E-43  |
| RP11-496I   | ENSG00000 | 1.37 | 37.17  | -4.009 | 1.15E-76  |
| RP11-109E   | ENSG00000 | 0    | 30.06  | -4.957 | 1.36E-65  |
| RP1-17K7.3  | ENSG00000 | 0    | 12.44  | -3.748 | 1.54E-60  |
| RP11-574M   | ENSG00000 | 0.92 | 14.63  | -3.025 | 2.79E-44  |
| NPIPA2      | ENSG00000 | 0.22 | 4.15   | -2.078 | 1.13E-31  |
| RP11-867C   | ENSG00000 | 0.14 | 23.18  | -4.407 | 3.51E-93  |
| RP11-831A   | ENSG00000 | 0    | 18.301 | -4.271 | 4.44E-63  |
| SCARNA9     | ENSG00000 | 0.58 | 6.57   | -2.26  | 4.25E-68  |
| RP11-677M   | ENSG00000 | 0.46 | 4.85   | -2.002 | 3.18E-64  |
| KIRREL3-AS1 | ENSG00000 | 0    | 26.711 | -4.792 | 5.58E-70  |
| KRTAP5-9    | ENSG00000 | 0.09 | 4.2    | -2.254 | 5.36E-66  |
| RP11-23J9   | ENSG00000 | 0.3  | 9.17   | -2.968 | 1.12E-102 |
| RP11-347H   | ENSG00000 | 3.66 | 58.989 | -3.686 | 3.55E-47  |
| RP11-712L   | ENSG00000 | 0.54 | 8.62   | -2.643 | 2.15E-45  |
| ZFP91-CN1   | ENSG00000 | 0    | 3.61   | -2.205 | 1.38E-46  |
| RP11-495C   | ENSG00000 | 0    | 3.82   | -2.269 | 1.79E-43  |
| ZNF286A     | ENSG00000 | 0.11 | 19.91  | -4.236 | 1.06E-77  |
| RP5-1027C   | ENSG00000 | 0    | 4.76   | -2.526 | 4.02E-49  |
| OVOL1-AS1   | ENSG00000 | 0    | 9.53   | -3.396 | 2.51E-59  |
| RP11-646J   | ENSG00000 | 0    | 3.49   | -2.167 | 1.03E-52  |
| STX17-AS1   | ENSG00000 | 0.76 | 6.17   | -2.026 | 3.73E-41  |
| TOLLIP-AS1  | ENSG00000 | 0.5  | 7.27   | -2.463 | 8.92E-113 |
| RP11-318C   | ENSG00000 | 0    | 5.24   | -2.642 | 3.90E-50  |
| RP11-670M   | ENSG00000 | 0    | 5.14   | -2.618 | 3.63E-51  |
| RP11-166I   | ENSG00000 | 1.5  | 14.78  | -2.658 | 1.60E-19  |
| TCEB2P2     | ENSG00000 | 1.36 | 26.359 | -3.535 | 2.81E-54  |
| RP11-702F   | ENSG00000 | 0    | 7.66   | -3.114 | 4.96E-65  |
| RP11-375I   | ENSG00000 | 0    | 7.16   | -3.029 | 4.82E-53  |
| WTAPP1      | ENSG00000 | 0.1  | 4.04   | -2.196 | 1.46E-43  |
| RP11-1082   | ENSG00000 | 0    | 3.69   | -2.23  | 1.71E-54  |
| LINC01495   | ENSG00000 | 0    | 3.43   | -2.147 | 4.71E-46  |
| RP11-201M   | ENSG00000 | 0    | 10.53  | -3.527 | 1.86E-60  |
| RP11-358H   | ENSG00000 | 0    | 21.13  | -4.468 | 8.29E-59  |
| RP11-469M   | ENSG00000 | 0    | 3.36   | -2.124 | 9.39E-59  |
| NOX5        | ENSG00000 | 0.08 | 6.83   | -2.858 | 5.41E-96  |
| RP11-539C   | ENSG00000 | 0.69 | 39.401 | -4.579 | 2.05E-93  |

|           |           |      |         |        |          |
|-----------|-----------|------|---------|--------|----------|
| SEPT14P8  | ENSG00000 | 0.14 | 5.36    | -2.48  | 2.84E-03 |
| RP11-535A | ENSG00000 | 0.11 | 38.759  | -5.163 | 4.62E-75 |
| NPIP8     | ENSG00000 | 0.31 | 18.6    | -3.903 | 5.61E-82 |
| NEDD8-M   | ENSG00000 | 1.19 | 11.61   | -2.526 | 8.59E-42 |
| RP11-168K | ENSG00000 | 0    | 4.27    | -2.398 | 1.25E-47 |
| RP11-810F | ENSG00000 | 0    | 3.81    | -2.266 | 6.47E-52 |
| RP11-6B1C | ENSG00000 | 0    | 3.3     | -2.104 | 2.87E-38 |
| LINC00925 | ENSG00000 | 0.85 | 39.601  | -4.456 | 3.28E-61 |
| RP11-273E | ENSG00000 | 0.4  | 6.61    | -2.442 | 2.39E-39 |
| RP11-188C | ENSG00000 | 0.19 | 6.98    | -2.745 | 1.90E-87 |
| RP11-502M | ENSG00000 | 0    | 62.361  | -5.986 | 3.75E-74 |
| FAM222A-  | ENSG00000 | 0    | 13.38   | -3.846 | 2.74E-66 |
| RP11-867C | ENSG00000 | 0    | 5.31    | -2.658 | 1.91E-34 |
| RP11-711K | ENSG00000 | 0    | 7.06    | -3.011 | 2.09E-56 |
| RP11-407A | ENSG00000 | 0    | 7.69    | -3.119 | 6.86E-63 |
| RP11-728C | ENSG00000 | 0.26 | 5.43    | -2.351 | 6.71E-39 |
| RP11-526F | ENSG00000 | 0    | 11.85   | -3.684 | 5.02E-55 |
| RP13-942M | ENSG00000 | 2.55 | 21.23   | -2.647 | 4.61E-57 |
| RP11-319E | ENSG00000 | 0.06 | 19.05   | -4.241 | 1.41E-62 |
| RP11-778F | ENSG00000 | 0    | 21.22   | -4.474 | 3.98E-61 |
| LINC00944 | ENSG00000 | 0.12 | 31.36   | -4.853 | 9.26E-70 |
| RP11-504C | ENSG00000 | 0.19 | 13.44   | -3.601 | 1.23E-72 |
| RP3-446N  | ENSG00000 | 0    | 4.82    | -2.541 | 1.92E-56 |
| RP11-106C | ENSG00000 | 0.14 | 8.14    | -3.003 | 2.11E-35 |
| RP11-705C | ENSG00000 | 0.1  | 56.539  | -5.709 | 2.37E-67 |
| RP13-653M | ENSG00000 | 0    | 10.05   | -3.466 | 4.91E-62 |
| LINC01486 | ENSG00000 | 0    | 14.43   | -3.948 | 7.44E-66 |
| RP11-522M | ENSG00000 | 0.04 | 3.4     | -2.081 | 4.45E-51 |
| RP11-49K4 | ENSG00000 | 0    | 3.03    | -2.011 | 1.78E-36 |
| RP11-727F | ENSG00000 | 1.33 | 9.46    | -2.166 | 2.17E-56 |
| RP11-669M | ENSG00000 | 0    | 3.69    | -2.23  | 6.75E-47 |
| RP11-407A | ENSG00000 | 0    | 31.919  | -5.041 | 4.76E-67 |
| RP13-941M | ENSG00000 | 0.52 | 16.35   | -3.513 | 4.69E-58 |
| RP11-3L23 | ENSG00000 | 0    | 23.079  | -4.59  | 2.61E-64 |
| RP11-7M8  | ENSG00000 | 0    | 4       | -2.322 | 1.92E-52 |
| RP11-664C | ENSG00000 | 0.07 | 20.68   | -4.341 | 6.83E-56 |
| RP13-81N  | ENSG00000 | 0    | 11.91   | -3.69  | 1.43E-57 |
| RP11-474C | ENSG00000 | 0    | 6.57    | -2.92  | 5.89E-62 |
| RP11-783K | ENSG00000 | 1.46 | 40.229  | -4.067 | 1.80E-58 |
| RP11-881M | ENSG00000 | 0    | 19.401  | -4.351 | 1.01E-67 |
| RP11-268F | ENSG00000 | 0.22 | 6.57    | -2.633 | 2.06E-47 |
| RP11-783K | ENSG00000 | 0.37 | 750.183 | -9.099 | 1.09E-81 |
| RP11-123C | ENSG00000 | 0    | 5       | -2.585 | 1.79E-48 |
| RP11-783K | ENSG00000 | 1.15 | 25.47   | -3.622 | 5.31E-88 |
| RP11-554C | ENSG00000 | 0    | 4.05    | -2.336 | 5.30E-54 |
| RP11-320M | ENSG00000 | 0.48 | 5.52    | -2.139 | 3.64E-60 |
| TMPO-AS1  | ENSG00000 | 3.01 | 21.55   | -2.492 | 3.33E-37 |
| FAM205BP  | ENSG00000 | 0    | 10.83   | -3.564 | 4.58E-61 |
| RP11-669E | ENSG00000 | 0    | 3.45    | -2.154 | 2.52E-62 |



|                      |       |         |        |          |
|----------------------|-------|---------|--------|----------|
| RP11-983F ENSG00000  | 2.44  | 15.07   | -2.224 | 1.60E-43 |
| RP11-762I ENSG00000  | 1.77  | 15.44   | -2.569 | 1.68E-46 |
| RP11-310I ENSG00000  | 0     | 3.19    | -2.067 | 1.28E-44 |
| RP11-121C ENSG00000  | 0     | 6.87    | -2.976 | 1.09E-53 |
| RP11-175F ENSG00000  | 0.36  | 4.88    | -2.112 | 6.08E-61 |
| RP11-101E ENSG00000  | 0.01  | 5.72    | -2.734 | 2.52E-92 |
| RP11-486A ENSG00000  | 0.81  | 8.12    | -2.333 | 1.31E-35 |
| NPIPBP1 ENSG00000    | 0.03  | 17.859  | -4.195 | 2.31E-64 |
| RP11-755C ENSG00000  | 0     | 11.81   | -3.679 | 1.90E-59 |
| OR7E47P ENSG00000    | 1.02  | 10.25   | -2.477 | 2.97E-47 |
| OVCH1-AS1 ENSG00000  | 0.75  | 16.49   | -3.321 | 3.07E-39 |
| RP11-100F ENSG00000  | 0     | 9.2     | -3.351 | 7.12E-53 |
| RP11-384J ENSG00000  | 0.04  | 7.87    | -3.092 | 4.82E-52 |
| LINC01481 ENSG00000  | 0.37  | 9.28    | -2.908 | 2.59E-66 |
| RP11-175F ENSG00000  | 0     | 4.34    | -2.417 | 7.83E-53 |
| RP11-620J ENSG00000  | 14.78 | 296.584 | -4.237 | 5.91E-76 |
| RP11-482I ENSG00000  | 0.16  | 20.629  | -4.221 | 1.17E-76 |
| RP11-396F ENSG00000  | 0.65  | 9.06    | -2.608 | 6.18E-39 |
| LINC01490 ENSG00000  | 0     | 5.82    | -2.77  | 1.86E-52 |
| MGAM2 ENSG00000      | 0.05  | 3.26    | -2.02  | 4.77E-32 |
| RP11-966I ENSG00000  | 0     | 5.03    | -2.592 | 2.51E-52 |
| RP11-474L ENSG00000  | 0.05  | 9.06    | -3.26  | 3.86E-63 |
| RP11-70F1 ENSG00000  | 0     | 22.841  | -4.575 | 1.88E-62 |
| RP11-630C ENSG00000  | 0     | 45.559  | -5.541 | 3.28E-63 |
| RP11-552I ENSG00000  | 0     | 11.71   | -3.668 | 1.50E-58 |
| RP1-90J4.1 ENSG00000 | 0     | 14.39   | -3.944 | 6.93E-81 |
| RP11-167M ENSG00000  | 0     | 5.88    | -2.782 | 6.22E-51 |
| LINC00935 ENSG00000  | 0.83  | 31.471  | -4.149 | 3.67E-41 |
| RP11-100F ENSG00000  | 0     | 8.18    | -3.199 | 9.24E-52 |
| RP11-543F ENSG00000  | 0     | 4.84    | -2.546 | 1.34E-44 |
| RP11-781A ENSG00000  | 0.1   | 11.69   | -3.528 | 2.05E-58 |
| RP11-328C ENSG00000  | 0     | 4.61    | -2.488 | 5.62E-49 |
| RP11-474F ENSG00000  | 0.04  | 5.93    | -2.736 | 1.38E-63 |
| RP11-89K2 ENSG00000  | 0     | 5.17    | -2.625 | 3.53E-51 |
| RP11-347C ENSG00000  | 0.84  | 57.071  | -4.98  | 3.97E-63 |
| RP11-70F1 ENSG00000  | 0     | 10.95   | -3.579 | 1.21E-57 |
| RP11-864J ENSG00000  | 0.13  | 4.28    | -2.224 | 3.21E-57 |
| RP11-345J ENSG00000  | 0.42  | 4.96    | -2.069 | 1.65E-31 |
| RP11-977C ENSG00000  | 1.42  | 9.86    | -2.166 | 2.13E-57 |
| RP11-38F2 ENSG00000  | 0     | 6.96    | -2.993 | 1.88E-58 |
| PRSS58 ENSG00000     | 0     | 30.67   | -4.985 | 5.88E-61 |
| RP11-162M ENSG00000  | 0     | 7.07    | -3.013 | 8.59E-39 |
| RP11-219E ENSG00000  | 0.56  | 11.41   | -2.992 | 5.01E-37 |
| LINC00592 ENSG00000  | 0     | 4.49    | -2.457 | 2.27E-56 |
| TESC-AS1 ENSG00000   | 0     | 7.76    | -3.131 | 7.82E-62 |
| RP11-536C ENSG00000  | 0.07  | 5.35    | -2.569 | 3.83E-51 |
| RP11-107C ENSG00000  | 0     | 5.52    | -2.705 | 1.03E-75 |
| RP11-300J ENSG00000  | 0     | 3.27    | -2.094 | 6.84E-43 |
| RP11-665C ENSG00000  | 0     | 17.34   | -4.197 | 2.41E-50 |

|           |           |      |        |        |          |
|-----------|-----------|------|--------|--------|----------|
| RP11-486C | ENSG00000 | 0    | 5.39   | -2.676 | 7.40E-52 |
| RP11-452I | ENSG00000 | 0    | 3.41   | -2.141 | 1.80E-43 |
| RP11-164J | ENSG00000 | 1.07 | 12.25  | -2.678 | 3.15E-94 |
| RP11-388E | ENSG00000 | 0    | 3.67   | -2.223 | 1.67E-46 |
| RP11-76E1 | ENSG00000 | 0.03 | 6.84   | -2.928 | 6.42E-63 |
| SPESP1    | ENSG00000 | 6.13 | 56.219 | -3.005 | 2.56E-44 |
| RP11-99L1 | ENSG00000 | 0    | 3.51   | -2.173 | 9.26E-47 |
| RP11-783L | ENSG00000 | 0    | 4.54   | -2.47  | 3.26E-47 |
| RP11-185F | ENSG00000 | 0    | 3.67   | -2.223 | 2.12E-51 |
| RP11-829F | ENSG00000 | 0.15 | 7.55   | -2.894 | 5.13E-44 |
| RP11-111F | ENSG00000 | 0.12 | 10.6   | -3.373 | 1.37E-59 |
| RP11-753I | ENSG00000 | 0    | 4.22   | -2.384 | 6.40E-45 |
| RP11-14J7 | ENSG00000 | 0.01 | 6.47   | -2.887 | 4.12E-54 |
| LINC01500 | ENSG00000 | 0    | 10.87  | -3.569 | 1.17E-62 |
| FAM181A-  | ENSG00000 | 0    | 16.27  | -4.11  | 1.62E-60 |
| NBEAP1    | ENSG00000 | 0.12 | 4.67   | -2.34  | 8.06E-38 |
| RP11-219E | ENSG00000 | 0    | 18.52  | -4.287 | 3.30E-52 |
| LINC00930 | ENSG00000 | 0.05 | 84.401 | -6.346 | 7.20E-82 |
| RP11-509F | ENSG00000 | 0.21 | 5.05   | -2.322 | 1.16E-53 |
| RP11-386M | ENSG00000 | 0.02 | 6.11   | -2.801 | 8.92E-67 |
| LINC01193 | ENSG00000 | 0    | 17.81  | -4.233 | 3.34E-67 |
| RP11-661C | ENSG00000 | 0    | 5.35   | -2.667 | 9.46E-54 |
| PRC1-AS1  | ENSG00000 | 0.15 | 33.219 | -4.895 | 1.04E-67 |
| RP11-547I | ENSG00000 | 0.06 | 10.52  | -3.442 | 5.94E-58 |
| RP11-603E | ENSG00000 | 2.27 | 28.13  | -3.155 | 1.47E-48 |
| RP11-112J | ENSG00000 | 0.17 | 4.56   | -2.249 | 3.66E-66 |
| RP11-73E1 | ENSG00000 | 0.46 | 9.9    | -2.9   | 9.99E-60 |
| RP11-862C | ENSG00000 | 0    | 11.17  | -3.605 | 7.87E-63 |
| RP11-163M | ENSG00000 | 0    | 10.19  | -3.484 | 2.82E-55 |
| LINC01579 | ENSG00000 | 0.77 | 10.07  | -2.645 | 4.80E-46 |
| LINC01568 | ENSG00000 | 0    | 4.78   | -2.531 | 1.48E-42 |
| LINC01580 | ENSG00000 | 0.11 | 3.52   | -2.026 | 8.25E-46 |
| RP11-561E | ENSG00000 | 0.33 | 5.99   | -2.394 | 1.63E-70 |
| RNASE4    | ENSG00000 | 1.8  | 12.63  | -2.283 | 5.68E-19 |
| RP11-300J | ENSG00000 | 0    | 3.39   | -2.134 | 9.64E-52 |
| RP11-123K | ENSG00000 | 0.17 | 4.43   | -2.214 | 6.21E-52 |
| MC1R      | ENSG00000 | 3.61 | 37.519 | -3.063 | 1.33E-80 |
| RP11-286C | ENSG00000 | 0    | 33.18  | -5.095 | 2.15E-60 |
| RP11-232C | ENSG00000 | 0    | 26.729 | -4.793 | 2.70E-50 |
| RP5-1021I | ENSG00000 | 0.01 | 9.27   | -3.346 | 5.16E-60 |
| RP11-164C | ENSG00000 | 0    | 3.41   | -2.141 | 6.46E-48 |
| RP11-463J | ENSG00000 | 0    | 8.21   | -3.203 | 2.64E-66 |
| RP11-857E | ENSG00000 | 0.11 | 14.31  | -3.786 | 5.69E-80 |
| RP11-363J | ENSG00000 | 0.2  | 9.46   | -3.124 | 6.21E-70 |
| RP11-1017 | ENSG00000 | 0.53 | 7.85   | -2.532 | 3.48E-55 |
| LINC01467 | ENSG00000 | 0.02 | 7      | -2.971 | 5.08E-55 |
| TSPY1     | ENSG00000 | 0.4  | 9.92   | -2.963 | 5.07E-06 |
| RP11-2C7  | ENSG00000 | 0    | 4.6    | -2.485 | 1.48E-53 |
| RNASE11   | ENSG00000 | 0    | 12.84  | -3.791 | 1.58E-59 |

|           |           |      |        |        |          |
|-----------|-----------|------|--------|--------|----------|
| RP11-371E | ENSG00000 | 0    | 4.45   | -2.446 | 7.72E-26 |
| RP11-168L | ENSG00000 | 0    | 29.539 | -4.933 | 1.90E-65 |
| RP11-603E | ENSG00000 | 0.47 | 5.08   | -2.048 | 3.15E-47 |
| LINC00911 | ENSG00000 | 0    | 6.74   | -2.952 | 2.72E-59 |
| RP11-973M | ENSG00000 | 0.05 | 8.32   | -3.15  | 4.10E-74 |
| RP11-840I | ENSG00000 | 0.08 | 7.18   | -2.921 | 3.39E-66 |
| SMIM6     | ENSG00000 | 0.12 | 33.681 | -4.953 | 1.78E-54 |
| RP1-261D  | ENSG00000 | 0.53 | 8.71   | -2.666 | 8.51E-65 |
| LINC00929 | ENSG00000 | 0    | 27.729 | -4.844 | 2.49E-55 |
| RP11-107E | ENSG00000 | 0.02 | 10.48  | -3.492 | 1.17E-55 |
| RP11-763K | ENSG00000 | 0    | 8.1    | -3.186 | 2.30E-62 |
| RP11-69H  | ENSG00000 | 0    | 61.341 | -5.962 | 3.30E-72 |
| RP11-810K | ENSG00000 | 0    | 39.45  | -5.338 | 3.22E-79 |
| SLC35G6   | ENSG00000 | 0.02 | 6.2    | -2.819 | 1.96E-62 |
| RP11-182J | ENSG00000 | 1.32 | 9.46   | -2.173 | 8.13E-40 |
| RP11-684E | ENSG00000 | 0    | 22.27  | -4.54  | 1.39E-70 |
| USP3-AS1  | ENSG00000 | 1.07 | 26.199 | -3.716 | 2.03E-72 |
| RP11-643M | ENSG00000 | 0.05 | 4.34   | -2.346 | 5.71E-75 |
| RP11-624L | ENSG00000 | 0    | 7.61   | -3.106 | 3.22E-48 |
| LINGO1-AS | ENSG00000 | 0    | 12.59  | -3.764 | 5.53E-64 |
| SPATA8-AS | ENSG00000 | 0    | 7.53   | -3.093 | 8.51E-59 |
| PAK6      | ENSG00000 | 1.64 | 13.73  | -2.48  | 1.31E-48 |
| RP11-687M | ENSG00000 | 0    | 3.93   | -2.302 | 4.47E-45 |
| RP11-183E | ENSG00000 | 0    | 3.06   | -2.021 | 4.67E-46 |
| OR11K1P   | ENSG00000 | 0    | 6.72   | -2.949 | 1.83E-58 |
| RP11-798K | ENSG00000 | 0.14 | 3.7    | -2.044 | 9.21E-39 |
| RP11-15E1 | ENSG00000 | 0.31 | 4.51   | -2.072 | 2.29E-46 |
| LINC00927 | ENSG00000 | 0    | 56.308 | -5.841 | 5.60E-73 |
| RP11-605F | ENSG00000 | 0.06 | 4.15   | -2.281 | 9.88E-71 |
| RP11-27M  | ENSG00000 | 0    | 5.17   | -2.625 | 3.76E-47 |
| RP11-566K | ENSG00000 | 0.11 | 54.071 | -5.633 | 4.92E-72 |
| THTPA     | ENSG00000 | 4.58 | 29.311 | -2.441 | 1.29E-54 |
| RP11-462F | ENSG00000 | 0    | 10.83  | -3.564 | 7.71E-57 |
| RORA-AS2  | ENSG00000 | 0    | 7.66   | -3.114 | 1.07E-56 |
| UBE2Q2L   | ENSG00000 | 0.18 | 10.32  | -3.262 | 9.63E-64 |
| RP11-526I | ENSG00000 | 0.13 | 5.65   | -2.557 | 3.17E-59 |
| LINC01491 | ENSG00000 | 0    | 7.34   | -3.06  | 1.14E-58 |
| RP11-66B2 | ENSG00000 | 0.74 | 7.47   | -2.283 | 3.87E-74 |
| RBM17P4   | ENSG00000 | 0    | 3.63   | -2.211 | 2.99E-61 |
| RP11-463I | ENSG00000 | 0.08 | 4.38   | -2.317 | 7.48E-54 |
| RP11-554E | ENSG00000 | 0    | 13.17  | -3.825 | 3.53E-67 |
| LINC01582 | ENSG00000 | 0    | 4.92   | -2.566 | 3.82E-79 |
| RP11-643C | ENSG00000 | 0.09 | 3.58   | -2.071 | 2.78E-65 |
| RP11-89K1 | ENSG00000 | 3.35 | 32.159 | -2.93  | 1.21E-59 |
| LINGO1-AS | ENSG00000 | 0.02 | 16.59  | -4.108 | 4.89E-65 |
| RP11-299F | ENSG00000 | 0    | 6.03   | -2.814 | 1.98E-67 |
| RP11-485C | ENSG00000 | 0    | 18.83  | -4.31  | 1.50E-63 |
| RP11-762F | ENSG00000 | 0    | 6.83   | -2.969 | 4.19E-59 |
| LINC00677 | ENSG00000 | 0    | 7.64   | -3.111 | 2.58E-57 |

|           |           |       |        |        |          |
|-----------|-----------|-------|--------|--------|----------|
| RP11-348E | ENSG00000 | 0     | 3.33   | -2.114 | 4.25E-56 |
| LINC00933 | ENSG00000 | 0.18  | 9.42   | -3.143 | 2.92E-90 |
| ZNF444P1  | ENSG00000 | 0.36  | 8.42   | -2.792 | 3.37E-66 |
| RP11-100E | ENSG00000 | 0.2   | 30.849 | -4.73  | 2.59E-77 |
| RP11-53L2 | ENSG00000 | 0     | 3.77   | -2.254 | 2.63E-48 |
| LINC00567 | ENSG00000 | 0.01  | 8.34   | -3.209 | 7.90E-82 |
| PWRN1     | ENSG00000 | 1.33  | 85.36  | -5.212 | 5.28E-69 |
| RP11-932C | ENSG00000 | 0     | 4.96   | -2.575 | 1.32E-56 |
| RP6-91H8. | ENSG00000 | 0.04  | 53.861 | -5.721 | 3.10E-71 |
| RP11-218M | ENSG00000 | 0.18  | 13.62  | -3.631 | 6.43E-53 |
| RP11-553L | ENSG00000 | 2.28  | 16.91  | -2.449 | 1.42E-48 |
| RP11-480I | ENSG00000 | 0     | 11.5   | -3.644 | 5.90E-72 |
| LA16c-390 | ENSG00000 | 0.59  | 5.59   | -2.051 | 6.51E-67 |
| GOLGA2P1  | ENSG00000 | 0     | 19.01  | -4.323 | 7.93E-84 |
| RP11-2C2z | ENSG00000 | 0.04  | 6.23   | -2.797 | 1.79E-60 |
| RP11-33B1 | ENSG00000 | 2.47  | 21.97  | -2.727 | 4.23E-48 |
| RP11-568M | ENSG00000 | 0.36  | 8.05   | -2.734 | 4.66E-60 |
| LA16c-312 | ENSG00000 | 0     | 7.12   | -3.021 | 1.86E-54 |
| RP11-109F | ENSG00000 | 0     | 3.04   | -2.014 | 1.68E-59 |
| RP11-83Nf | ENSG00000 | 0.99  | 8.9    | -2.315 | 2.94E-51 |
| RP11-441F | ENSG00000 | 0.07  | 3.35   | -2.023 | 8.50E-57 |
| RP3-333B1 | ENSG00000 | 0     | 6.03   | -2.814 | 1.16E-62 |
| RP11-303E | ENSG00000 | 0.15  | 15.401 | -3.834 | 2.82E-69 |
| WI2-2610f | ENSG00000 | 0.04  | 46.549 | -5.515 | 3.17E-62 |
| RP11-368I | ENSG00000 | 0.14  | 8.91   | -3.12  | 1.35E-65 |
| LINC00919 | ENSG00000 | 0     | 58.94  | -5.905 | 5.05E-70 |
| RP11-101E | ENSG00000 | 0.28  | 15.44  | -3.683 | 7.09E-62 |
| ITFG1-AS1 | ENSG00000 | 0.29  | 84.278 | -6.047 | 1.57E-78 |
| TBC1D3G   | ENSG00000 | 0     | 28.019 | -4.859 | 6.17E-58 |
| RP11-24M  | ENSG00000 | 0.26  | 16.66  | -3.809 | 4.64E-65 |
| RP11-505k | ENSG00000 | 1.03  | 19.59  | -3.342 | 4.16E-70 |
| NTRK3-AS  | ENSG00000 | 0     | 7.92   | -3.157 | 3.15E-54 |
| HSPB9     | ENSG00000 | 0.26  | 17.01  | -3.837 | 9.09E-66 |
| LINC01570 | ENSG00000 | 0     | 27.63  | -4.839 | 1.69E-70 |
| RP11-103E | ENSG00000 | 0.32  | 15.58  | -3.651 | 3.50E-74 |
| LINC01043 | ENSG00000 | 0     | 3.02   | -2.007 | 2.14E-43 |
| RP11-56L1 | ENSG00000 | 0     | 4.41   | -2.436 | 3.30E-58 |
| RP1-155Dz | ENSG00000 | 0     | 5.47   | -2.694 | 8.20E-62 |
| RP13-735L | ENSG00000 | 0.35  | 5.95   | -2.364 | 1.84E-50 |
| RP11-202I | ENSG00000 | 0     | 12.81  | -3.788 | 2.98E-63 |
| RP11-96Df | ENSG00000 | 0     | 12.01  | -3.702 | 8.37E-75 |
| LCMT1-AS  | ENSG00000 | 0.66  | 7.07   | -2.281 | 6.18E-78 |
| RP4-561L2 | ENSG00000 | 0.17  | 4.65   | -2.272 | 5.43E-98 |
| RP11-85A1 | ENSG00000 | 0.13  | 7.09   | -2.84  | 6.42E-91 |
| LINC01584 | ENSG00000 | 0     | 6.82   | -2.967 | 1.39E-58 |
| RP11-109E | ENSG00000 | 0     | 8.71   | -3.279 | 6.40E-64 |
| RP11-510M | ENSG00000 | 0     | 7.79   | -3.136 | 2.34E-58 |
| PWRN2     | ENSG00000 | 0     | 19.03  | -4.324 | 6.13E-68 |
| RP11-24Nf | ENSG00000 | 17.67 | 97.18  | -2.395 | 9.69E-16 |

|                      |      |        |        |          |
|----------------------|------|--------|--------|----------|
| RP11-491F ENSG00000  | 0.43 | 5.07   | -2.086 | 2.68E-67 |
| RP11-327F ENSG00000  | 0    | 5.44   | -2.687 | 1.54E-50 |
| RP11-24D1 ENSG00000  | 0    | 16.59  | -4.137 | 7.43E-57 |
| RP11-452L ENSG00000  | 0.25 | 5.07   | -2.28  | 4.35E-79 |
| RP11-303E ENSG00000  | 0.74 | 8.38   | -2.43  | 3.24E-63 |
| RP11-114C ENSG00000  | 0.24 | 8.77   | -2.978 | 8.36E-41 |
| RP11-439E ENSG00000  | 0.12 | 4.85   | -2.385 | 1.08E-55 |
| RP11-165M ENSG00000  | 0    | 3.37   | -2.128 | 4.00E-43 |
| LINC01227 ENSG00000  | 0    | 26.221 | -4.767 | 2.23E-62 |
| RP11-482M ENSG00000  | 0.07 | 3.38   | -2.033 | 1.48E-62 |
| RP11-114F ENSG00000  | 0.13 | 12.88  | -3.619 | 9.13E-77 |
| RP11-872J ENSG00000  | 1.12 | 7.5    | -2.003 | 2.28E-51 |
| RP11-1437 ENSG00000  | 0    | 5.77   | -2.759 | 1.02E-56 |
| RP11-524C ENSG00000  | 0.28 | 15.23  | -3.664 | 3.17E-71 |
| RP11-80F2 ENSG00000  | 0.18 | 36.141 | -4.976 | 7.25E-78 |
| LINC01229 ENSG00000  | 0.2  | 8.1    | -2.923 | 2.57E-76 |
| TAT-AS1 ENSG00000    | 0.24 | 18.47  | -3.973 | 1.13E-65 |
| RP11-380C ENSG00000  | 0    | 5.07   | -2.602 | 2.70E-66 |
| RP11-483F ENSG00000  | 0    | 7.32   | -3.057 | 1.80E-62 |
| RP11-548M ENSG00000  | 0    | 5.49   | -2.698 | 3.34E-47 |
| RP11-30L1 ENSG00000  | 0.4  | 16.95  | -3.68  | 5.98E-60 |
| RP11-297L ENSG00000  | 0    | 7      | -3     | 6.02E-48 |
| RP11-190C ENSG00000  | 0    | 4.13   | -2.359 | 7.70E-52 |
| RP11-854K ENSG00000  | 0.35 | 6.35   | -2.445 | 5.97E-39 |
| RP11-546E ENSG00000  | 0    | 7.88   | -3.151 | 4.41E-62 |
| RP11-96C2 ENSG00000  | 0.24 | 4.05   | -2.026 | 1.27E-70 |
| RP11-370F ENSG00000  | 0    | 5.63   | -2.729 | 6.01E-52 |
| GS1-279B7 ENSG00000  | 0    | 4.53   | -2.467 | 8.29E-50 |
| RP1-149C7 ENSG00000  | 0.05 | 3.96   | -2.24  | 6.84E-66 |
| RP11-481J ENSG00000  | 0    | 3.23   | -2.081 | 8.37E-38 |
| RP1-166H2 ENSG00000  | 0    | 5.32   | -2.66  | 1.25E-58 |
| LMO7-AS1 ENSG00000   | 0.34 | 4.61   | -2.066 | 2.25E-29 |
| RP11-496C ENSG00000  | 0.06 | 4.83   | -2.459 | 9.84E-77 |
| RP11-17M ENSG00000   | 1.9  | 37.639 | -3.736 | 1.92E-28 |
| RP4-798A1 ENSG00000  | 0.81 | 7.68   | -2.262 | 6.53E-50 |
| RP11-697E ENSG00000  | 0.14 | 11.19  | -3.419 | 1.43E-76 |
| RP11-215E ENSG00000  | 0.03 | 11.51  | -3.602 | 1.51E-49 |
| RP11-723C ENSG00000  | 0.77 | 9.08   | -2.51  | 3.74E-74 |
| RP11-681H1 ENSG00000 | 0.31 | 6      | -2.418 | 4.51E-76 |
| RP11-113E ENSG00000  | 0    | 32.03  | -5.046 | 8.92E-66 |
| RP11-2L4.1 ENSG00000 | 0    | 3.67   | -2.223 | 5.06E-46 |
| RNF126P1 ENSG00000   | 0.63 | 17.57  | -3.51  | 4.75E-50 |
| RP3-496C2 ENSG00000  | 0.07 | 11.04  | -3.492 | 1.09E-71 |
| LA16c-361 ENSG00000  | 0.14 | 5.33   | -2.473 | 1.78E-86 |
| RP11-304L ENSG00000  | 0.22 | 11.22  | -3.324 | 1.48E-63 |
| GOLGA8T ENSG00000    | 0.11 | 8.32   | -3.07  | 1.75E-70 |
| RP3-388M ENSG00000   | 0.2  | 4.42   | -2.175 | 2.14E-72 |
| RP11-760C ENSG00000  | 0.01 | 22.86  | -4.562 | 2.75E-83 |
| ULK4P1 ENSG00000     | 0.7  | 6.81   | -2.2   | 2.69E-44 |

|           |           |      |         |        |           |
|-----------|-----------|------|---------|--------|-----------|
| RP11-299F | ENSG00000 | 0.01 | 6.97    | -2.98  | 8.91E-66  |
| RP11-343F | ENSG00000 | 0.07 | 4.32    | -2.314 | 7.91E-83  |
| RP11-160C | ENSG00000 | 0    | 13.68   | -3.876 | 6.12E-83  |
| RP11-653J | ENSG00000 | 0    | 5.29    | -2.653 | 7.39E-63  |
| RP11-279C | ENSG00000 | 0.73 | 7.56    | -2.307 | 1.17E-32  |
| PDCD6IPP  | ENSG00000 | 2.44 | 25.76   | -2.96  | 1.89E-51  |
| RP11-60L3 | ENSG00000 | 0    | 3.09    | -2.032 | 2.69E-46  |
| RP11-165M | ENSG00000 | 0    | 41.85   | -5.421 | 5.07E-65  |
| RP11-244E | ENSG00000 | 0    | 5.13    | -2.616 | 9.79E-59  |
| RP11-114F | ENSG00000 | 0    | 8.2     | -3.202 | 5.29E-62  |
| RP11-326A | ENSG00000 | 0    | 38.539  | -5.305 | 1.21E-74  |
| RP11-1007 | ENSG00000 | 0.39 | 7.13    | -2.548 | 1.75E-71  |
| RP11-217E | ENSG00000 | 0.24 | 14.53   | -3.647 | 4.63E-67  |
| RP11-589C | ENSG00000 | 0    | 3.11    | -2.039 | 1.63E-62  |
| RP11-626C | ENSG00000 | 0.66 | 12.97   | -3.073 | 1.73E-57  |
| RP11-152C | ENSG00000 | 0    | 12.06   | -3.707 | 1.89E-66  |
| PAN3-AS1  | ENSG00000 | 0.6  | 8.13    | -2.513 | 5.52E-95  |
| TP53TG3B  | ENSG00000 | 0.42 | 12.01   | -3.196 | 2.12E-52  |
| RP11-527L | ENSG00000 | 0.38 | 9.52    | -2.93  | 1.68E-46  |
| RP11-665J | ENSG00000 | 0    | 4.79    | -2.534 | 1.32E-51  |
| RP11-457M | ENSG00000 | 0.52 | 13.61   | -3.265 | 2.98E-92  |
| TMEM249   | ENSG00000 | 0.45 | 38.81   | -4.779 | 6.12E-73  |
| TPBGL     | ENSG00000 | 0.63 | 5.71    | -2.041 | 6.21E-55  |
| RP11-426L | ENSG00000 | 0    | 5.99    | -2.805 | 6.83E-66  |
| PRSS46    | ENSG00000 | 0    | 9.64    | -3.411 | 6.43E-64  |
| RP11-414J | ENSG00000 | 0.03 | 4.19    | -2.333 | 1.52E-82  |
| RP11-580I | ENSG00000 | 0.03 | 4.39    | -2.388 | 2.65E-60  |
| RP11-883C | ENSG00000 | 0    | 10.51   | -3.525 | 1.78E-50  |
| RP11-700F | ENSG00000 | 0    | 3.98    | -2.316 | 3.68E-52  |
| GOLGA6L7  | ENSG00000 | 0.05 | 44.78   | -5.446 | 6.16E-75  |
| RP11-178L | ENSG00000 | 0.01 | 11.13   | -3.586 | 5.27E-73  |
| RP11-327F | ENSG00000 | 0    | 3.21    | -2.074 | 3.73E-42  |
| RP4-612B1 | ENSG00000 | 0.59 | 6.1     | -2.159 | 3.59E-85  |
| MIR3976H  | ENSG00000 | 0    | 15.55   | -4.049 | 2.55E-63  |
| GOLGA8S   | ENSG00000 | 0.12 | 9.44    | -3.221 | 3.14E-77  |
| RP11-152C | ENSG00000 | 0    | 7.38    | -3.067 | 7.61E-60  |
| RP11-122E | ENSG00000 | 0.71 | 130.381 | -6.264 | 4.21E-78  |
| GOLGA8H   | ENSG00000 | 0.2  | 7.88    | -2.888 | 1.71E-66  |
| RP11-744I | ENSG00000 | 0    | 4       | -2.322 | 3.33E-46  |
| RP11-244E | ENSG00000 | 0.45 | 6.15    | -2.302 | 1.01E-41  |
| RP11-434E | ENSG00000 | 0    | 12.79   | -3.786 | 1.77E-60  |
| LINC00662 | ENSG00000 | 3.39 | 27.92   | -2.72  | 3.91E-61  |
| RP11-146F | ENSG00000 | 2.08 | 49.942  | -4.048 | 1.58E-70  |
| RP11-893F | ENSG00000 | 0    | 4.23    | -2.387 | 6.20E-51  |
| RP11-63A1 | ENSG00000 | 0    | 8.89    | -3.306 | 8.86E-56  |
| RP11-23E1 | ENSG00000 | 0    | 46.52   | -5.57  | 5.12E-32  |
| RP13-638C | ENSG00000 | 0.37 | 16.67   | -3.689 | 5.83E-49  |
| RP11-266L | ENSG00000 | 0.13 | 6.92    | -2.809 | 5.53E-102 |
| RP11-353M | ENSG00000 | 0.01 | 3.51    | -2.159 | 9.31E-71  |

|                      |        |         |        |          |
|----------------------|--------|---------|--------|----------|
| RP11-160E ENSG00000  | 0.33   | 9.35    | -2.96  | 3.94E-44 |
| RP11-960E ENSG00000  | 0      | 26.02   | -4.756 | 4.94E-59 |
| RP11-515E ENSG00000  | 0      | 7.01    | -3.002 | 2.54E-58 |
| RP11-388C ENSG00000  | 1.06   | 8.22    | -2.162 | 8.54E-79 |
| RP11-65J2 ENSG00000  | 0.61   | 58.161  | -5.2   | 3.58E-69 |
| LA16c-349 ENSG00000  | 0.19   | 4.07    | -2.091 | 5.85E-76 |
| RP11-266L ENSG00000  | 0.02   | 6.98    | -2.968 | 1.41E-68 |
| RP11-196C ENSG00000  | 0.43   | 8.43    | -2.721 | 5.10E-93 |
| RP11-353M ENSG00000  | 0.04   | 6.21    | -2.793 | 1.08E-67 |
| RP11-4618 ENSG00000  | 0.46   | 6.51    | -2.363 | 1.86E-30 |
| RP11-105E ENSG00000  | 1.31   | 11.12   | -2.391 | 6.95E-45 |
| RP11-156F ENSG00000  | 4.17   | 54.628  | -3.428 | 3.52E-74 |
| TMPOP2 ENSG00000     | 0.19   | 7.27    | -2.797 | 1.96E-69 |
| ROCK1P1 ENSG00000    | 1.46   | 49.559  | -4.361 | 2.86E-73 |
| RP11-388C ENSG00000  | 0.11   | 4.12    | -2.206 | 5.65E-61 |
| RP11-291L ENSG00000  | 4.53   | 37.65   | -2.805 | 7.08E-43 |
| RP11-166F ENSG00000  | 0.08   | 9.44    | -3.273 | 1.94E-59 |
| LRRC37A17 ENSG00000  | 0.93   | 9.14    | -2.393 | 5.02E-60 |
| RP11-849I ENSG00000  | 0.69   | 10.39   | -2.753 | 5.42E-34 |
| RP11-333E ENSG00000  | 0.47   | 15.519  | -3.49  | 2.29E-83 |
| RP11-109M ENSG00000  | 0      | 7.72    | -3.124 | 1.98E-62 |
| THCAT158 ENSG00000   | 0.1    | 11.45   | -3.501 | 4.37E-70 |
| RP1-4G17.1 ENSG00000 | 0      | 6.31    | -2.87  | 2.69E-49 |
| RP1-59D14 ENSG00000  | 1.07   | 7.64    | -2.061 | 2.81E-72 |
| RP11-202C ENSG00000  | 0      | 9.88    | -3.444 | 1.40E-57 |
| RP11-707C ENSG00000  | 0      | 8.59    | -3.262 | 5.58E-64 |
| UBBP4 ENSG00000      | 1.16   | 114.3   | -5.738 | 3.78E-88 |
| RP11-527F ENSG00000  | 0      | 3.35    | -2.121 | 1.02E-50 |
| PPP4R1-AS1 ENSG00000 | 0      | 7.2     | -3.036 | 9.89E-67 |
| RP11-628C ENSG00000  | 0      | 15.75   | -4.066 | 1.59E-62 |
| RP11-746E ENSG00000  | 0      | 12.52   | -3.757 | 1.89E-58 |
| RP11-580I ENSG00000  | 2.7    | 17.23   | -2.301 | 3.26E-48 |
| LINC00908 ENSG00000  | 0.17   | 4.84    | -2.319 | 4.44E-65 |
| RP11-573C ENSG00000  | 0.36   | 13.09   | -3.373 | 2.65E-62 |
| RP11-5316 ENSG00000  | 0      | 4.46    | -2.449 | 2.62E-43 |
| SNORD3A ENSG00000    | 76.119 | 544.843 | -2.823 | 9.73E-10 |
| RP11-434C ENSG00000  | 0.2    | 7.75    | -2.866 | 9.17E-64 |
| RP11-192F ENSG00000  | 0.08   | 7.81    | -3.028 | 3.34E-66 |
| RP11-583F ENSG00000  | 0.26   | 11.1    | -3.263 | 7.17E-77 |
| RP11-739M ENSG00000  | 0.03   | 11.48   | -3.599 | 4.00E-57 |
| RP1-37N7.1 ENSG00000 | 0.01   | 3.79    | -2.246 | 1.59E-57 |
| RP11-757C ENSG00000  | 0.05   | 5.45    | -2.619 | 4.90E-66 |
| RP13-270F ENSG00000  | 0.35   | 35.52   | -4.758 | 3.20E-83 |
| RP11-271K ENSG00000  | 0.05   | 16.02   | -4.019 | 2.37E-60 |
| RP11-14P2 ENSG00000  | 0.06   | 3.95    | -2.223 | 9.59E-11 |
| NOTCH2N1 ENSG00000   | 6.28   | 45.679  | -2.681 | 1.11E-80 |
| MAPT-AS1 ENSG00000   | 0      | 18.76   | -4.305 | 6.90E-65 |
| RP11-381F ENSG00000  | 0.11   | 3.55    | -2.035 | 2.37E-29 |
| RP11-92B1 ENSG00000  | 0      | 4.88    | -2.556 | 1.34E-55 |

|           |                 |       |        |        |          |
|-----------|-----------------|-------|--------|--------|----------|
| RP11-26N  | ENSG00000100000 | 0     | 3.43   | -2.147 | 6.65E-45 |
| RP11-343K | ENSG00000100000 | 0     | 3.53   | -2.18  | 8.27E-43 |
| RP11-6N1  | ENSG00000100000 | 6.9   | 37.851 | -2.298 | 5.71E-44 |
| RP11-214C | ENSG00000100000 | 0.03  | 3.92   | -2.256 | 2.32E-58 |
| RP11-110E | ENSG00000100000 | 0.07  | 4.09   | -2.25  | 6.42E-52 |
| RP11-387F | ENSG00000100000 | 0.11  | 10.87  | -3.419 | 6.30E-81 |
| RN7SL664F | ENSG00000100000 | 0     | 3.09   | -2.032 | 6.27E-47 |
| RP11-285M | ENSG00000100000 | 0     | 3.44   | -2.151 | 1.80E-45 |
| SNORD3B   | ENSG00000100000 | 1.32  | 9.2    | -2.136 | 1.09E-05 |
| KRT18P55  | ENSG00000100000 | 0.02  | 15.15  | -3.985 | 8.42E-79 |
| MIR1539   | ENSG00000100000 | 0     | 3.85   | -2.278 | 1.86E-62 |
| RP11-434C | ENSG00000100000 | 0     | 4.38   | -2.428 | 4.41E-53 |
| RP13-516M | ENSG00000100000 | 0.11  | 3.54   | -2.032 | 2.67E-62 |
| RP11-156L | ENSG00000100000 | 0.04  | 5.05   | -2.54  | 6.37E-55 |
| RP11-849F | ENSG00000100000 | 0.98  | 13.25  | -2.847 | 5.24E-42 |
| RP11-17M  | ENSG00000100000 | 0.59  | 11.67  | -2.994 | 3.02E-74 |
| RP11-19P2 | ENSG00000100000 | 0     | 9.75   | -3.426 | 5.49E-58 |
| RP11-20B2 | ENSG00000100000 | 0     | 13.37  | -3.845 | 2.11E-65 |
| LINC00668 | ENSG00000100000 | 1.21  | 63.399 | -4.865 | 1.88E-71 |
| GATA6-AS  | ENSG00000100000 | 0.26  | 5.6    | -2.389 | 2.95E-22 |
| NDUFV2-A  | ENSG00000100000 | 1.08  | 56.18  | -4.781 | 1.38E-85 |
| RHOT1P1   | ENSG00000100000 | 0.18  | 10.17  | -3.243 | 9.08E-58 |
| RP11-715C | ENSG00000100000 | 0     | 3.1    | -2.036 | 1.76E-67 |
| RP11-111F | ENSG00000100000 | 0     | 5.05   | -2.597 | 5.75E-51 |
| TBC1D3P5  | ENSG00000100000 | 0     | 3.73   | -2.242 | 1.86E-47 |
| RP11-149I | ENSG00000100000 | 0     | 3.73   | -2.242 | 1.30E-55 |
| RP11-401F | ENSG00000100000 | 0.26  | 6.21   | -2.517 | 3.37E-76 |
| GDF10     | ENSG00000100000 | 0.12  | 9.04   | -3.164 | 6.47E-38 |
| RP11-94B1 | ENSG00000100000 | 0     | 4      | -2.322 | 2.97E-49 |
| RP5-1148A | ENSG00000100000 | 0.78  | 6.17   | -2.01  | 2.80E-33 |
| MYO15B    | ENSG00000100000 | 20.46 | 91.982 | -2.115 | 1.62E-35 |
| TBC1D29   | ENSG00000100000 | 0.12  | 13.71  | -3.715 | 1.18E-58 |
| RP11-862L | ENSG00000100000 | 0.11  | 16.58  | -3.985 | 6.38E-46 |
| RP5-1022F | ENSG00000100000 | 0     | 9.29   | -3.363 | 7.91E-61 |
| ZNF793-A  | ENSG00000100000 | 6.17  | 62.292 | -3.142 | 2.75E-46 |
| FXD1      | ENSG00000100000 | 2.53  | 14.5   | -2.135 | 5.84E-11 |
| RP11-749F | ENSG00000100000 | 0     | 16.5   | -4.129 | 4.91E-59 |
| LRRC37A1  | ENSG00000100000 | 0.34  | 5.12   | -2.191 | 2.41E-56 |
| RP11-92C4 | ENSG00000100000 | 0.07  | 21.39  | -4.387 | 2.19E-71 |
| RP11-456C | ENSG00000100000 | 0.15  | 11.41  | -3.432 | 1.59E-49 |
| SLC14A2-A | ENSG00000100000 | 0     | 16.54  | -4.133 | 1.28E-66 |
| RP11-846C | ENSG00000100000 | 0     | 9.03   | -3.326 | 4.47E-56 |
| RP11-449J | ENSG00000100000 | 0.25  | 21.251 | -4.154 | 8.47E-64 |
| RP11-677C | ENSG00000100000 | 0     | 7.92   | -3.157 | 1.25E-22 |
| RP11-411E | ENSG00000100000 | 0.23  | 8.88   | -3.006 | 1.66E-57 |
| RP11-527L | ENSG00000100000 | 0     | 4.53   | -2.467 | 3.14E-53 |
| LCN6      | ENSG00000100000 | 0.78  | 9.83   | -2.605 | 1.49E-38 |
| WDR7-OT   | ENSG00000100000 | 0     | 4.03   | -2.331 | 2.64E-47 |
| LINC01255 | ENSG00000100000 | 0     | 34.329 | -5.143 | 3.62E-67 |



|                     |      |         |        |          |
|---------------------|------|---------|--------|----------|
| MAP3K14- ENSG00000  | 1.76 | 75.258  | -4.788 | 3.51E-72 |
| RP11-8H2. ENSG00000 | 0.05 | 3.71    | -2.165 | 2.43E-76 |
| SNHG22 ENSG00000    | 1.04 | 8.05    | -2.149 | 3.14E-76 |
| LINC01478 ENSG00000 | 0    | 3.24    | -2.084 | 4.09E-50 |
| LINC00906 ENSG00000 | 0    | 19.67   | -4.369 | 2.27E-70 |
| RP11-749F ENSG00000 | 0    | 3.04    | -2.014 | 1.96E-41 |
| RP11-527L ENSG00000 | 0    | 3.7     | -2.233 | 4.14E-52 |
| RP11-552F ENSG00000 | 0.62 | 6.89    | -2.284 | 2.54E-82 |
| RP1-37N7. ENSG00000 | 0.17 | 4.09    | -2.121 | 1.93E-36 |
| ZNF571-A9 ENSG00000 | 3.56 | 35.911  | -3.017 | 8.38E-65 |
| MIR497HG ENSG00000  | 0.86 | 7.89    | -2.257 | 7.67E-48 |
| RP11-666F ENSG00000 | 0.52 | 6.12    | -2.228 | 6.86E-95 |
| RP11-383M ENSG00000 | 0    | 5.39    | -2.676 | 1.48E-74 |
| RP11-128F ENSG00000 | 0    | 7.14    | -3.025 | 1.83E-55 |
| RP11-126C ENSG00000 | 0    | 64.44   | -6.032 | 1.19E-67 |
| RAD51L3-F ENSG00000 | 0    | 5.37    | -2.671 | 9.77E-49 |
| RP11-905K ENSG00000 | 0.05 | 3.52    | -2.106 | 2.63E-55 |
| RP11-64C1 ENSG00000 | 0    | 4.04    | -2.333 | 8.08E-65 |
| RP11-95O2 ENSG00000 | 0.56 | 10.43   | -2.873 | 3.99E-77 |
| LINC01539 ENSG00000 | 0.03 | 23.501  | -4.572 | 4.49E-63 |
| RP11-64C1 ENSG00000 | 0.37 | 28.509  | -4.429 | 1.67E-72 |
| RP11-718I ENSG00000 | 0    | 7.37    | -3.065 | 1.39E-50 |
| RP11-379L ENSG00000 | 0    | 3.07    | -2.025 | 1.22E-43 |
| LINC01533 ENSG00000 | 0    | 12.94   | -3.801 | 6.90E-61 |
| SMIM22 ENSG00000    | 1.57 | 54.628  | -4.436 | 4.26E-46 |
| RP5-1023E ENSG00000 | 0    | 368.468 | -8.529 | 2.82E-83 |
| RP11-157E ENSG00000 | 0    | 5.64    | -2.731 | 8.89E-52 |
| RP4-569M ENSG00000  | 0.11 | 7.43    | -2.925 | 1.32E-54 |
| MAGEA9B ENSG00000   | 0.39 | 12.46   | -3.275 | 5.37E-32 |
| RP11-805I ENSG00000 | 0    | 4.96    | -2.575 | 4.82E-60 |
| RP11-388K ENSG00000 | 0    | 5.82    | -2.77  | 1.24E-52 |
| ZNF649-A9 ENSG00000 | 0.05 | 53.319  | -5.693 | 9.56E-76 |
| RP11-678C ENSG00000 | 0.02 | 10.64   | -3.512 | 6.23E-61 |
| SSX2B ENSG00000     | 0.22 | 7.54    | -2.807 | 2.93E-22 |
| RP11-805I ENSG00000 | 0.01 | 5.91    | -2.774 | 7.39E-44 |
| RP11-464F ENSG00000 | 0.37 | 7.83    | -2.688 | 1.37E-77 |
| RP11-316C ENSG00000 | 0.33 | 4.36    | -2.011 | 5.76E-48 |
| MAGEA2 ENSG00000    | 0.14 | 5.14    | -2.429 | 8.22E-28 |
| TEX13A ENSG00000    | 0.07 | 13.97   | -3.806 | 7.28E-71 |
| MIMT1 ENSG00000     | 0.21 | 7.62    | -2.833 | 3.18E-50 |
| HSFX2 ENSG00000     | 0.3  | 15.04   | -3.625 | 9.43E-59 |
| SCGB1B2P ENSG00000  | 1.08 | 10.67   | -2.488 | 2.08E-50 |
| RP11-514C ENSG00000 | 0    | 4.23    | -2.387 | 1.40E-48 |
| RP11-1137 ENSG00000 | 0    | 8.63    | -3.268 | 3.61E-70 |
| ESPNP ENSG00000     | 0.17 | 4.12    | -2.13  | 2.89E-48 |
| SPANXN2 ENSG00000   | 0    | 3.93    | -2.302 | 1.19E-49 |
| RP1-172N: ENSG00000 | 0    | 19.28   | -4.342 | 3.89E-68 |
| RP11-256I ENSG00000 | 1.14 | 13.02   | -2.712 | 4.09E-71 |
| LINC01082 ENSG00000 | 0    | 18.07   | -4.253 | 1.25E-36 |

|           |            |      |         |        |          |
|-----------|------------|------|---------|--------|----------|
| ZNF350-A  | ENSG000001 | 1.51 | 22.139  | -3.205 | 2.36E-51 |
| GOLGA2P9  | ENSG000001 | 0.08 | 91.493  | -6.42  | 1.70E-81 |
| LINC01233 | ENSG000001 | 0.13 | 20.609  | -4.257 | 3.87E-65 |
| NXF2      | ENSG000001 | 0.83 | 12.34   | -2.866 | 2.74E-32 |
| NXF2B     | ENSG000001 | 0.56 | 14.64   | -3.326 | 2.25E-52 |
| ZIM2      | ENSG000001 | 0.54 | 6.97    | -2.372 | 5.03E-59 |
| RP11-1137 | ENSG000001 | 0.06 | 39.229  | -5.246 | 3.10E-87 |
| RP11-816J | ENSG000001 | 0.12 | 3.6     | -2.038 | 6.13E-64 |
| RP4-740C  | ENSG000001 | 1.11 | 8.75    | -2.208 | 5.16E-42 |
| RP11-932C | ENSG000001 | 2.17 | 25.849  | -3.082 | 2.22E-61 |
| RP5-1069C | ENSG000001 | 0    | 12.85   | -3.792 | 2.78E-67 |
| RP11-394C | ENSG000001 | 1.18 | 19.211  | -3.213 | 2.88E-38 |
| RP11-245F | ENSG000001 | 0    | 4.93    | -2.568 | 3.19E-60 |
| RNU11     | ENSG000001 | 0    | 5.84    | -2.774 | 1.02E-05 |
| RP11-568J | ENSG000001 | 0    | 10.5    | -3.524 | 1.16E-60 |
| RP11-793F | ENSG000001 | 0.8  | 6.99    | -2.15  | 2.29E-56 |
| RP11-572C | ENSG000001 | 1.65 | 9.73    | -2.018 | 4.41E-72 |
| RP11-123J | ENSG000001 | 0    | 12.61   | -3.767 | 1.36E-71 |
| HEATR9    | ENSG000001 | 0.07 | 15.5    | -3.947 | 2.01E-60 |
| RP11-359E | ENSG000001 | 0.07 | 3.48    | -2.066 | 4.62E-58 |
| LOC40191  | ENSG000001 | 0.06 | 4.51    | -2.378 | 1.91E-53 |
| RP11-373C | ENSG000001 | 0    | 3.23    | -2.081 | 2.07E-27 |
| U1        | ENSG000001 | 0    | 4.34    | -2.417 | 8.61E-16 |
| RP11-103J | ENSG000001 | 0    | 5.9     | -2.787 | 1.11E-56 |
| LINC00221 | ENSG000001 | 1.94 | 11.73   | -2.114 | 7.17E-17 |
| RP11-355E | ENSG000001 | 3.59 | 17.78   | -2.033 | 3.29E-54 |
| RP11-607F | ENSG000001 | 0.13 | 22.5    | -4.378 | 1.12E-74 |
| NAMA      | ENSG000001 | 0.01 | 4.96    | -2.561 | 6.48E-71 |
| RP11-416L | ENSG000001 | 0    | 6.11    | -2.83  | 5.50E-55 |
| RP11-75N  | ENSG000001 | 0    | 5.92    | -2.791 | 6.03E-57 |
| RP4-799G  | ENSG000001 | 0    | 6.14    | -2.836 | 4.09E-62 |
| MMP28     | ENSG000001 | 0.93 | 51.388  | -4.763 | 1.33E-89 |
| RP11-89C  | ENSG000001 | 0.65 | 8.58    | -2.538 | 5.91E-60 |
| RP11-335E | ENSG000001 | 0    | 8.13    | -3.191 | 5.33E-76 |
| LINC00904 | ENSG000001 | 0    | 3.37    | -2.128 | 1.22E-58 |
| RP11-548K | ENSG000001 | 0.81 | 16.84   | -3.301 | 1.28E-25 |
| GS1-393G  | ENSG000001 | 0.32 | 6.99    | -2.598 | 2.72E-78 |
| MROH7-T   | ENSG000001 | 0.08 | 11.99   | -3.588 | 2.72E-85 |
| RP1-202O  | ENSG000001 | 0    | 44.929  | -5.521 | 2.51E-71 |
| RP11-52L5 | ENSG000001 | 0    | 7.26    | -3.046 | 1.65E-66 |
| RP11-426L | ENSG000001 | 0.23 | 17.689  | -3.925 | 1.01E-72 |
| RP11-493E | ENSG000001 | 0.26 | 119.817 | -6.583 | 3.61E-72 |
| RP4-635E1 | ENSG000001 | 6.52 | 31.899  | -2.129 | 8.61E-62 |
| RP11-354K | ENSG000001 | 0    | 3.57    | -2.192 | 7.00E-66 |
| RP11-572C | ENSG000001 | 0.24 | 5.57    | -2.406 | 6.72E-77 |
| RP4-736L2 | ENSG000001 | 0.12 | 7.96    | -3     | 2.01E-63 |
| RP11-79O  | ENSG000001 | 0.16 | 4.63    | -2.279 | 1.66E-67 |
| RP1-313I6 | ENSG000001 | 1.39 | 13.79   | -2.63  | 1.00E-57 |
| RP11-421M | ENSG000001 | 0.24 | 7.2     | -2.725 | 1.56E-63 |

|           |           |       |         |        |           |
|-----------|-----------|-------|---------|--------|-----------|
| RP11-107C | ENSG00000 | 0     | 4.4     | -2.433 | 2.70E-50  |
| RP11-428J | ENSG00000 | 1.34  | 13.61   | -2.642 | 6.24E-42  |
| FGF14-AS2 | ENSG00000 | 1.77  | 11.03   | -2.119 | 6.87E-81  |
| NBPF25P   | ENSG00000 | 0.84  | 7.78    | -2.255 | 2.35E-58  |
| RP11-156E | ENSG00000 | 0.15  | 6.43    | -2.692 | 1.00E-94  |
| HIST2H2A  | ENSG00000 | 3.77  | 85.591  | -4.182 | 4.11E-58  |
| XXbac-BPC | ENSG00000 | 0.49  | 7.26    | -2.471 | 6.42E-84  |
| RP5-855D  | ENSG00000 | 1.39  | 9.7     | -2.163 | 1.01E-49  |
| XXbac-BPC | ENSG00000 | 0.81  | 12.26   | -2.873 | 1.11E-47  |
| TPTE2P2   | ENSG00000 | 1.67  | 9.93    | -2.033 | 1.07E-30  |
| RP11-140K | ENSG00000 | 4.37  | 98.92   | -4.218 | 3.77E-83  |
| RP11-65L1 | ENSG00000 | 0     | 6.66    | -2.937 | 2.53E-65  |
| RP13-539J | ENSG00000 | 0.06  | 7.18    | -2.948 | 4.14E-59  |
| RP11-359I | ENSG00000 | 0.25  | 15.47   | -3.72  | 2.24E-71  |
| RP11-25O  | ENSG00000 | 0     | 3.81    | -2.266 | 1.17E-59  |
| RP11-363E | ENSG00000 | 0.09  | 4.14    | -2.237 | 2.04E-52  |
| RP1-225E1 | ENSG00000 | 0     | 6.37    | -2.882 | 2.59E-55  |
| RP11-532M | ENSG00000 | 0.2   | 6.19    | -2.583 | 2.59E-56  |
| RP11-713M | ENSG00000 | 0.33  | 18.24   | -3.855 | 8.93E-49  |
| RP11-105M | ENSG00000 | 0     | 7.49    | -3.086 | 1.98E-32  |
| XXbac-BPC | ENSG00000 | 0.22  | 10.67   | -3.258 | 1.89E-80  |
| RP11-638H | ENSG00000 | 18.45 | 105.601 | -2.454 | 9.31E-36  |
| ZSWIM8-A  | ENSG00000 | 1.59  | 19.46   | -2.982 | 6.15E-76  |
| RP11-504F | ENSG00000 | 10.52 | 57.221  | -2.337 | 8.07E-55  |
| RP11-191L | ENSG00000 | 0.47  | 6.04    | -2.26  | 2.32E-73  |
| RP11-190A | ENSG00000 | 0.39  | 6.08    | -2.349 | 1.69E-35  |
| RP11-803E | ENSG00000 | 0.97  | 12.59   | -2.786 | 2.51E-50  |
| RP1-63G5  | ENSG00000 | 0     | 22.461  | -4.552 | 9.48E-68  |
| MESTIT1   | ENSG00000 | 0.07  | 3.56    | -2.091 | 1.08E-53  |
| RP11-44N  | ENSG00000 | 0.26  | 11.08   | -3.261 | 6.98E-72  |
| STAG3L5P  | ENSG00000 | 29.49 | 198.858 | -2.713 | 4.28E-83  |
| JMJD1C-A  | ENSG00000 | 0.36  | 9.85    | -2.996 | 1.88E-57  |
| RP11-335L | ENSG00000 | 0.1   | 3.67    | -2.086 | 1.87E-66  |
| RP11-464F | ENSG00000 | 0.48  | 4.98    | -2.015 | 1.87E-77  |
| RP11-602M | ENSG00000 | 0.12  | 5.35    | -2.503 | 4.21E-80  |
| RP11-219A | ENSG00000 | 0     | 4.21    | -2.381 | 2.30E-52  |
| RP11-295M | ENSG00000 | 0.1   | 3.74    | -2.107 | 1.87E-54  |
| RP11-398C | ENSG00000 | 0.91  | 7.18    | -2.099 | 1.54E-69  |
| LL22NC03  | ENSG00000 | 1.28  | 13.58   | -2.677 | 6.00E-40  |
| RP5-1159C | ENSG00000 | 0.84  | 12.93   | -2.92  | 4.22E-82  |
| RP11-74E2 | ENSG00000 | 0.18  | 4.63    | -2.254 | 9.08E-50  |
| RP11-392E | ENSG00000 | 0.1   | 12.4    | -3.607 | 5.86E-82  |
| RP11-118K | ENSG00000 | 0.69  | 6.44    | -2.138 | 3.25E-32  |
| FAM95C    | ENSG00000 | 0.9   | 89.958  | -5.581 | 1.66E-100 |
| RP11-428K | ENSG00000 | 0.1   | 3.72    | -2.101 | 2.39E-62  |
| RP11-216L | ENSG00000 | 0.84  | 19.569  | -3.483 | 9.74E-88  |
| RP11-559M | ENSG00000 | 0.04  | 3.79    | -2.203 | 1.26E-62  |
| LYPD4     | ENSG00000 | 0.02  | 137.129 | -7.081 | 2.52E-94  |
| RP11-458F | ENSG00000 | 10.58 | 63.079  | -2.468 | 8.24E-36  |

|           |           |      |         |        |           |
|-----------|-----------|------|---------|--------|-----------|
| RP11-449F | ENSG00000 | 0.68 | 6.39    | -2.137 | 7.07E-71  |
| RP11-392E | ENSG00000 | 0.15 | 23.501  | -4.413 | 9.68E-101 |
| RP11-11N  | ENSG00000 | 0.07 | 7.59    | -3.005 | 3.07E-61  |
| FAM25BP   | ENSG00000 | 0    | 9.7     | -3.42  | 9.29E-56  |
| RP3-402G1 | ENSG00000 | 0.51 | 8.52    | -2.656 | 2.87E-82  |
| RP11-136C | ENSG00000 | 0.13 | 7.57    | -2.923 | 7.88E-131 |
| RP11-496F | ENSG00000 | 1    | 235.714 | -6.887 | 3.96E-72  |
| RBAKDN    | ENSG00000 | 1.3  | 672.457 | -8.194 | 6.49E-73  |
| RP11-672L | ENSG00000 | 0.95 | 9.73    | -2.46  | 1.03E-72  |
| RP11-634F | ENSG00000 | 1.95 | 18.621  | -2.734 | 5.82E-60  |
| RP11-255E | ENSG00000 | 0.3  | 6.18    | -2.465 | 2.88E-67  |
| RP11-87C7 | ENSG00000 | 0    | 9.08    | -3.333 | 2.44E-58  |
| ST7-OT4_2 | ENSG00000 | 0    | 3.28    | -2.098 | 3.50E-14  |
| ST7-OT4_1 | ENSG00000 | 0    | 4.79    | -2.534 | 1.15E-28  |
| RP5-908M  | ENSG00000 | 3.68 | 36.39   | -2.998 | 2.10E-67  |
| RP11-758F | ENSG00000 | 2.01 | 17.22   | -2.598 | 9.70E-75  |
| RP11-613E | ENSG00000 | 0.09 | 14.44   | -3.824 | 7.94E-60  |
| U1        | ENSG00000 | 4.86 | 44.301  | -2.951 | 1.70E-36  |
| RP11-227C | ENSG00000 | 0    | 3.43    | -2.147 | 3.38E-55  |
| GOLGA6L1  | ENSG00000 | 0.12 | 34.64   | -4.992 | 6.75E-54  |
| FAM27E3   | ENSG00000 | 0.8  | 22.161  | -3.686 | 1.67E-69  |
| uc_338    | ENSG00000 | 0    | 3.69    | -2.23  | 4.83E-26  |
| OR7E156P  | ENSG00000 | 1.41 | 15.6    | -2.784 | 1.04E-14  |
| H2AFB1    | ENSG00000 | 0.1  | 10.71   | -3.412 | 9.44E-17  |
| SOCS7     | ENSG00000 | 8.78 | 99.373  | -3.359 | 2.13E-52  |
| RP11-757C | ENSG00000 | 0.1  | 17.31   | -4.057 | 3.77E-72  |
| TBC1D3H   | ENSG00000 | 0    | 10      | -3.459 | 4.95E-38  |
| RP11-566k | ENSG00000 | 1.13 | 20.76   | -3.353 | 8.32E-60  |
| RP11-44M  | ENSG00000 | 3.02 | 28.709  | -2.886 | 8.95E-95  |
| GAGE13    | ENSG00000 | 0.28 | 25.259  | -4.359 | 1.26E-42  |
| RP11-347I | ENSG00000 | 0.65 | 6.46    | -2.177 | 4.92E-83  |
| RP11-486C | ENSG00000 | 0.08 | 20.281  | -4.3   | 2.53E-64  |
| RP5-994D  | ENSG00000 | 0.11 | 4.46    | -2.298 | 6.10E-46  |
| TPTE      | ENSG00000 | 3.96 | 81.769  | -4.061 | 7.43E-57  |
| LLNLR-304 | ENSG00000 | 0.08 | 5.3     | -2.544 | 2.94E-51  |
| RP11-403E | ENSG00000 | 0.05 | 24.501  | -4.602 | 2.09E-74  |
| RP11-285E | ENSG00000 | 0    | 5.67    | -2.738 | 1.77E-63  |
| SPDYE10P  | ENSG00000 | 0.43 | 14.32   | -3.421 | 1.43E-73  |
| RIMBP3B   | ENSG00000 | 0.04 | 15.49   | -3.987 | 1.24E-64  |
| FAM95B1   | ENSG00000 | 3.32 | 90.039  | -4.397 | 2.36E-38  |
| RP11-2C24 | ENSG00000 | 0.09 | 13.99   | -3.782 | 3.06E-71  |
| TBC1D3B   | ENSG00000 | 2.01 | 19.79   | -2.788 | 6.90E-50  |
| RP1-292L2 | ENSG00000 | 1.39 | 14.74   | -2.719 | 8.89E-94  |
| LINC01297 | ENSG00000 | 0.08 | 6.38    | -2.773 | 3.98E-71  |
| RP11-12A2 | ENSG00000 | 0.25 | 7.19    | -2.712 | 3.88E-69  |
| TBC1D3I   | ENSG00000 | 0.06 | 8.21    | -3.119 | 1.32E-47  |
| RP5-864K1 | ENSG00000 | 0.46 | 8.48    | -2.699 | 2.55E-34  |
| RP11-382E | ENSG00000 | 0    | 6.28    | -2.864 | 1.56E-64  |
| ZNF280B   | ENSG00000 | 2.48 | 16.19   | -2.304 | 1.12E-59  |

|           |           |      |         |        |          |
|-----------|-----------|------|---------|--------|----------|
| RP1-101D  | ENSG00000 | 0.01 | 4.66    | -2.486 | 4.77E-62 |
| RP11-187C | ENSG00000 | 0.3  | 5.46    | -2.313 | 1.44E-53 |
| RP4-737E2 | ENSG00000 | 0    | 5.88    | -2.782 | 2.28E-51 |
| RP3-446N  | ENSG00000 | 0    | 6.69    | -2.943 | 3.28E-55 |
| RP11-157L | ENSG00000 | 0    | 23.569  | -4.619 | 4.03E-64 |
| RP11-15J2 | ENSG00000 | 0    | 4.92    | -2.566 | 1.67E-58 |
| RP5-908M  | ENSG00000 | 0.36 | 4.81    | -2.095 | 1.21E-81 |
| RP11-666C | ENSG00000 | 1.01 | 8.84    | -2.291 | 3.48E-62 |
| RP11-266L | ENSG00000 | 1.93 | 81.019  | -4.807 | 1.94E-78 |
| LINC00684 | ENSG00000 | 0.09 | 322.085 | -8.211 | 1.69E-78 |
| KB-1572G7 | ENSG00000 | 0    | 4.64    | -2.496 | 1.65E-45 |
| RP4-547N  | ENSG00000 | 0.01 | 4.54    | -2.456 | 3.38E-89 |
| LYZL6     | ENSG00000 | 0    | 62.708  | -5.993 | 1.26E-72 |
| RP11-100C | ENSG00000 | 0.03 | 7.74    | -3.085 | 6.52E-65 |
| RP11-54C4 | ENSG00000 | 0.71 | 14.87   | -3.214 | 2.25E-93 |
| RIMBP3    | ENSG00000 | 0.15 | 33.381  | -4.902 | 1.12E-68 |
| RP11-457M | ENSG00000 | 0.02 | 19.04   | -4.296 | 1.74E-69 |
| RP11-291L | ENSG00000 | 2.95 | 27.53   | -2.853 | 4.01E-46 |
| LINC00162 | ENSG00000 | 0    | 7.19    | -3.034 | 3.48E-31 |
| RP11-613E | ENSG00000 | 1.01 | 29.28   | -3.913 | 1.10E-56 |
| PRSS2     | ENSG00000 | 0.08 | 7.22    | -2.928 | 3.18E-13 |
| TBC1D3F   | ENSG00000 | 0    | 7.31    | -3.055 | 1.20E-37 |
| RP11-61K9 | ENSG00000 | 2.05 | 18.72   | -2.693 | 2.62E-75 |
| SPATA31A  | ENSG00000 | 0.07 | 5.57    | -2.618 | 3.63E-51 |
| SPDYE11   | ENSG00000 | 0.17 | 4.01    | -2.098 | 1.06E-67 |
| SPATA31A  | ENSG00000 | 0.09 | 5.04    | -2.47  | 8.47E-42 |
| RP5-1017F | ENSG00000 | 0    | 17.4    | -4.202 | 7.55E-71 |
| FAM27E2   | ENSG00000 | 0    | 3.44    | -2.151 | 2.91E-44 |
| TTC28-AS  | ENSG00000 | 0    | 3.41    | -2.141 | 5.94E-14 |
| LINC00226 | ENSG00000 | 0.07 | 18.85   | -4.213 | 4.42E-60 |
| FLJ36000  | ENSG00000 | 0.34 | 9.18    | -2.925 | 6.57E-54 |
| RP11-195L | ENSG00000 | 0.09 | 13.78   | -3.761 | 8.35E-66 |
| NPPA-AS1  | ENSG00000 | 0.92 | 10.97   | -2.64  | 9.54E-22 |
| RP11-417C | ENSG00000 | 0    | 10      | -3.459 | 3.51E-57 |
| RP11-291L | ENSG00000 | 7    | 55.001  | -2.807 | 6.26E-48 |
| RP11-8P11 | ENSG00000 | 0.01 | 3.11    | -2.025 | 2.99E-68 |
| RP11-478K | ENSG00000 | 0    | 9.45    | -3.385 | 2.00E-61 |
| RP11-467L | ENSG00000 | 0.71 | 9.04    | -2.554 | 1.07E-67 |
| GSTTP1    | ENSG00000 | 0    | 36.481  | -5.228 | 1.62E-58 |
| RP11-476F | ENSG00000 | 0    | 9.94    | -3.452 | 4.71E-77 |
| RP11-108F | ENSG00000 | 0    | 3.12    | -2.043 | 6.24E-48 |
| STAG3L2   | ENSG00000 | 5.33 | 34.881  | -2.503 | 2.57E-62 |
| RP11-520E | ENSG00000 | 0.26 | 7.55    | -2.763 | 4.51E-57 |
| RP4-550H  | ENSG00000 | 0.13 | 6.15    | -2.662 | 6.45E-66 |
| GOLGA6L6  | ENSG00000 | 0.01 | 7.02    | -2.989 | 7.46E-57 |
| RP11-325L | ENSG00000 | 0.4  | 5.26    | -2.161 | 3.06E-65 |
| RP11-380M | ENSG00000 | 0.29 | 4.28    | -2.033 | 5.22E-61 |
| RP11-486I | ENSG00000 | 0.71 | 38.851  | -4.543 | 2.20E-82 |
| RP13-347C | ENSG00000 | 0    | 3.21    | -2.074 | 2.39E-65 |

|           |           |      |         |        |           |
|-----------|-----------|------|---------|--------|-----------|
| GOLGA8IP  | ENSG00000 | 0.07 | 8.79    | -3.194 | 3.19E-67  |
| RP11-961A | ENSG00000 | 0.45 | 7.57    | -2.563 | 2.69E-65  |
| RP11-374M | ENSG00000 | 0    | 4.28    | -2.4   | 1.08E-30  |
| XXbac-BPG | ENSG00000 | 0    | 6.21    | -2.85  | 1.33E-69  |
| RP11-734K | ENSG00000 | 2.45 | 102.721 | -4.91  | 4.53E-63  |
| RP11-693J | ENSG00000 | 0.63 | 8.28    | -2.509 | 5.41E-51  |
| GOLGA6L1  | ENSG00000 | 0.02 | 7.67    | -3.087 | 6.09E-76  |
| H2AFB3    | ENSG00000 | 0.07 | 38.719  | -5.214 | 4.26E-59  |
| LLNLF-136 | ENSG00000 | 0    | 3.13    | -2.046 | 5.07E-59  |
| RP11-269C | ENSG00000 | 0.45 | 7.74    | -2.592 | 3.73E-78  |
| RP11-714M | ENSG00000 | 0    | 3.2     | -2.07  | 2.04E-76  |
| GOLGA6L2  | ENSG00000 | 0.01 | 12.33   | -3.722 | 1.25E-63  |
| FAM230A   | ENSG00000 | 0    | 11.42   | -3.635 | 9.45E-56  |
| RP11-403F | ENSG00000 | 2.15 | 14.9    | -2.336 | 9.63E-64  |
| RP11-356M | ENSG00000 | 0    | 3.38    | -2.131 | 8.47E-25  |
| RP11-426C | ENSG00000 | 0.26 | 5.11    | -2.278 | 9.86E-63  |
| RDM1      | ENSG00000 | 2.28 | 16.959  | -2.453 | 3.48E-49  |
| RP11-34H  | ENSG00000 | 0    | 7.41    | -3.072 | 2.17E-36  |
| TEX28     | ENSG00000 | 0    | 11.3    | -3.621 | 2.93E-66  |
| RP11-736M | ENSG00000 | 0.08 | 4.28    | -2.289 | 8.62E-65  |
| RP11-87C1 | ENSG00000 | 0    | 4.26    | -2.395 | 2.96E-17  |
| RP11-440J | ENSG00000 | 0    | 8.55    | -3.256 | 3.14E-65  |
| RP11-12A2 | ENSG00000 | 0.25 | 10.09   | -3.149 | 1.24E-86  |
| PIK3R3    | ENSG00000 | 0    | 22.25   | -4.539 | 4.83E-54  |
| TSC22D1   | ENSG00000 | 0.25 | 5.6     | -2.401 | 3.61E-113 |
| SSTR3     | ENSG00000 | 0.24 | 9.65    | -3.102 | 1.15E-72  |
| RP11-245L | ENSG00000 | 2.92 | 33.611  | -3.142 | 1.92E-51  |
| TBC1D3C   | ENSG00000 | 0    | 6.66    | -2.937 | 8.44E-22  |
| OR7E104P  | ENSG00000 | 0.1  | 5.47    | -2.556 | 5.95E-21  |
| RP11-89H  | ENSG00000 | 0.07 | 3.78    | -2.159 | 1.43E-66  |
| RP11-96A1 | ENSG00000 | 0    | 8.7     | -3.278 | 1.10E-67  |
| RP11-457L | ENSG00000 | 0    | 8.17    | -3.197 | 1.93E-63  |
| POTEB3    | ENSG00000 | 0    | 5.26    | -2.646 | 3.14E-64  |
| TMEM191   | ENSG00000 | 2.89 | 172.278 | -5.477 | 4.00E-57  |
| GOLGA6L1  | ENSG00000 | 0.88 | 24.19   | -3.744 | 3.08E-65  |
| IQCA1L    | ENSG00000 | 0.03 | 14.69   | -3.929 | 2.04E-61  |
| MCM8-AS   | ENSG00000 | 0    | 5.99    | -2.805 | 2.70E-61  |
| RP11-12A2 | ENSG00000 | 0    | 30.279  | -4.967 | 1.26E-63  |
| FAM27B    | ENSG00000 | 0.45 | 20.72   | -3.905 | 2.30E-49  |
| RP11-23E1 | ENSG00000 | 0.47 | 5.8     | -2.21  | 2.01E-60  |
| RP11-327I | ENSG00000 | 0    | 11.66   | -3.662 | 8.06E-90  |
| NPPA-AS1  | ENSG00000 | 0.07 | 11.26   | -3.518 | 5.24E-14  |
| RP11-612J | ENSG00000 | 0    | 4.92    | -2.566 | 5.33E-44  |
| RP11-511F | ENSG00000 | 0.25 | 4.24    | -2.068 | 3.57E-91  |
| RP13-580E | ENSG00000 | 0.59 | 23.039  | -3.918 | 1.29E-43  |
| RP11-667F | ENSG00000 | 0.07 | 9.36    | -3.275 | 5.47E-59  |
| RP11-76C1 | ENSG00000 | 0    | 6.18    | -2.844 | 7.49E-57  |
| RP1-149M  | ENSG00000 | 0    | 16.6    | -4.138 | 6.08E-63  |
| RP11-203F | ENSG00000 | 0.11 | 5.91    | -2.638 | 2.05E-57  |

|           |           |        |         |        |          |
|-----------|-----------|--------|---------|--------|----------|
| RP11-36D  | ENSG00000 | 0      | 7.48    | -3.084 | 1.29E-51 |
| RP11-218M | ENSG00000 | 0      | 4.63    | -2.493 | 1.50E-61 |
| RP11-810F | ENSG00000 | 0.15   | 3.96    | -2.109 | 2.10E-81 |
| RP11-461C | ENSG00000 | 0      | 15.519  | -4.046 | 2.72E-63 |
| RP11-83B2 | ENSG00000 | 0      | 3.89    | -2.29  | 5.45E-48 |
| RP11-417M | ENSG00000 | 4.75   | 22.55   | -2.034 | 6.70E-35 |
| RP11-661A | ENSG00000 | 0.82   | 6.51    | -2.045 | 7.22E-72 |
| RP11-574K | ENSG00000 | 0.96   | 6.96    | -2.022 | 2.44E-49 |
| RP11-495K | ENSG00000 | 0.03   | 4.53    | -2.425 | 4.35E-56 |
| RP11-752C | ENSG00000 | 0.17   | 3.74    | -2.018 | 5.48E-85 |
| LINC00552 | ENSG00000 | 0.05   | 17.72   | -4.156 | 8.99E-86 |
| RP11-499E | ENSG00000 | 0.05   | 3.92    | -2.228 | 5.52E-67 |
| RP11-886F | ENSG00000 | 0.06   | 34.099  | -5.049 | 3.45E-72 |
| RP11-570J | ENSG00000 | 0      | 4.93    | -2.568 | 4.61E-39 |
| RP11-69M  | ENSG00000 | 0.61   | 5.79    | -2.076 | 8.33E-72 |
| RP11-447M | ENSG00000 | 0      | 3.89    | -2.29  | 6.56E-58 |
| RP11-1221 | ENSG00000 | 0      | 12.45   | -3.75  | 1.30E-57 |
| RP11-76C1 | ENSG00000 | 0.09   | 3.69    | -2.105 | 1.84E-46 |
| U51561.1  | ENSG00000 | 0      | 3.66    | -2.22  | 5.52E-53 |
| MGC39584  | ENSG00000 | 0.07   | 24.411  | -4.57  | 5.04E-68 |
| RP3-523C2 | ENSG00000 | 0      | 5.82    | -2.77  | 8.74E-60 |
| RP11-384M | ENSG00000 | 0.3    | 5.45    | -2.311 | 2.47E-86 |
| LA16c-380 | ENSG00000 | 1.01   | 11.75   | -2.665 | 2.31E-69 |
| MIR4697H  | ENSG00000 | 1.58   | 12.04   | -2.338 | 2.81E-63 |
| RP11-542F | ENSG00000 | 0      | 4.74    | -2.521 | 1.04E-58 |
| RP11-122E | ENSG00000 | 5.75   | 29.999  | -2.199 | 2.73E-27 |
| RP11-501I | ENSG00000 | 0.53   | 9.08    | -2.72  | 4.13E-56 |
| RP11-837J | ENSG00000 | 0.08   | 4.63    | -2.382 | 4.53E-59 |
| LINC01374 | ENSG00000 | 0      | 4.48    | -2.454 | 2.22E-60 |
| SCAANT1   | ENSG00000 | 0.46   | 5.32    | -2.114 | 1.53E-47 |
| RP11-983C | ENSG00000 | 0      | 8.96    | -3.316 | 4.74E-60 |
| LINC00251 | ENSG00000 | 0.02   | 3.2     | -2.042 | 1.46E-42 |
| LINC01232 | ENSG00000 | 0.82   | 9.41    | -2.516 | 3.90E-98 |
| RP4-777O  | ENSG00000 | 0.08   | 3.47    | -2.049 | 5.61E-57 |
| LINC00254 | ENSG00000 | 0      | 3.93    | -2.302 | 3.54E-50 |
| RP5-991B1 | ENSG00000 | 0      | 13.7    | -3.878 | 7.37E-62 |
| RP5-991B1 | ENSG00000 | 0      | 56.04   | -5.834 | 1.18E-72 |
| SEPSECS-1 | ENSG00000 | 4.22   | 23.98   | -2.259 | 1.98E-28 |
| RP4-669P1 | ENSG00000 | 0.7    | 15.95   | -3.318 | 5.87E-67 |
| LINC00895 | ENSG00000 | 0      | 3.5     | -2.17  | 7.99E-73 |
| GS1-114I9 | ENSG00000 | 0.83   | 6.72    | -2.077 | 2.04E-29 |
| RP11-384K | ENSG00000 | 0.06   | 8.62    | -3.182 | 1.46E-80 |
| FBF1      | ENSG00000 | 0.46   | 5.78    | -2.215 | 5.11E-83 |
| TMBIM4    | ENSG00000 | 1.04   | 24.289  | -3.632 | 4.24E-41 |
| RP11-506F | ENSG00000 | 0.39   | 8.39    | -2.756 | 8.29E-85 |
| RP11-527L | ENSG00000 | 0.24   | 6.07    | -2.511 | 1.79E-50 |
| RP11-173A | ENSG00000 | 0.06   | 8.07    | -3.097 | 1.06E-65 |
| LINC01002 | ENSG00000 | 60.241 | 406.919 | -2.736 | 2.93E-27 |
| RP11-389C | ENSG00000 | 0      | 35.299  | -5.182 | 3.66E-72 |

|          |                 |      |         |        |          |
|----------|-----------------|------|---------|--------|----------|
| C11orf71 | ENSG00000100000 | 2.18 | 222.675 | -6.136 | 1.07E-76 |
|----------|-----------------|------|---------|--------|----------|



**Table S3**

| GOID | Pathway   | Count | PValue   |
|------|-----------|-------|----------|
| 1    | intracell | 500   | #####    |
| 2    | cell part | 527   | #####    |
| 3    | cell      | 527   | #####    |
| 4    | intracell | 491   | #####    |
| 5    | organelle | 458   | #####    |
| 6    | binding   | 472   | 2.67E-96 |
| 7    | cellular  | 475   | 4.58E-90 |
| 8    | intracell | 425   | 1.07E-88 |
| 9    | single-or | 435   | 3.99E-83 |
| 10   | cytoplasm | 394   | 3.04E-82 |
| 11   | single-or | 400   | 8.41E-74 |
| 12   | single or | 135   | 3.55E-68 |
| 13   | membrane- | 394   | 1.62E-66 |
| 14   | reproduct | 138   | 1.02E-65 |
| 15   | reproduct | 138   | 1.13E-65 |
| 16   | sexual re | 109   | 5.66E-64 |
| 17   | multi-org | 114   | 1.14E-60 |
| 18   | protein k | 362   | 3.63E-60 |
| 19   | intracell | 362   | 1.29E-59 |
| 20   | spermatog | 88    | 1.44E-58 |
| 21   | male game | 88    | 1.60E-58 |
| 22   | gamete ge | 94    | 2.37E-57 |
| 23   | multicell | 103   | 6.57E-57 |
| 24   | multicell | 101   | 1.70E-55 |
| 25   | developme | 249   | 1.34E-53 |
| 26   | anatomica | 240   | 1.35E-53 |
| 27   | single-or | 243   | 2.73E-51 |
| 28   | cellular  | 198   | 1.34E-50 |
| 29   | multi-org | 153   | 4.92E-49 |
| 30   | multicell | 264   | 3.18E-48 |
| 31   | biologica | 345   | 4.53E-46 |
| 32   | metabolic | 333   | 2.74E-44 |
| 33   | organic s | 326   | 3.69E-44 |
| 34   | cellular  | 233   | 2.30E-42 |
| 35   | cell diff | 176   | 2.83E-42 |
| 36   | cellular  | 234   | 3.83E-41 |
| 37   | organelle | 278   | 1.65E-40 |
| 38   | cytoplasm | 272   | 3.56E-40 |
| 39   | regulatic | 322   | 3.96E-40 |
| 40   | primary n | 305   | 4.53E-38 |
| 41   | regulatic | 308   | 5.67E-38 |
| 42   | nucleus   | 243   | 4.67E-37 |
| 43   | intracell | 265   | 5.66E-36 |
| 44   | single-mu | 219   | 1.22E-35 |

|              |     |          |
|--------------|-----|----------|
| 45 cilium    | 64  | 1.26E-35 |
| 46 multicell | 194 | 4.62E-35 |
| 47 cellular  | 298 | 1.07E-34 |
| 48 non-membr | 169 | 5.25E-34 |
| 49 intracell | 169 | 5.25E-34 |
| 50 cell pro  | 111 | 4.61E-33 |

## Table S4

| GOID | Pathway   | Count | PValue   |
|------|-----------|-------|----------|
| 1    | Metabolis | 69    | 1.61E-08 |
| 2    | Assembly  | 18    | 2.05E-07 |
| 3    | Metabolis | 32    | 3.59E-06 |
| 4    | Organelle | 19    | 5.93E-05 |
| 5    | Intraflag | 8     | 8.53E-05 |
| 6    | Fertiliza | 6     | 0.000119 |
| 7    | Reproduct | 6     | 0.000119 |
| 8    | Signaling | 12    | 0.000122 |
| 9    | Anchoring | 9     | 0.00051  |
| 10   | Peptide h | 8     | 0.000918 |
| 11   | @@Disease | 22    | 0.102254 |
| 12   | @@Pyruvat | 3     | 0.051806 |
| 13   | Synthesis | 4     | 0.001437 |
| 14   | Signal Tr | 62    | 0.001521 |
| 15   | Meiosis   | 9     | 0.001765 |
| 16   | PIWI-inte | 5     | 0.001959 |
| 17   | MHC class | 9     | 0.001964 |
| 18   | Meiotic s | 7     | 0.003386 |
| 19   | Glutathic | 5     | 0.004194 |
| 20   | Biologica | 11    | 0.004215 |

## Table S5

| G0ID | Pathway  | Count | PValue   |
|------|----------|-------|----------|
| 1    | CCKR sig | 10    | 0.005916 |
| 2    | Huntingt | 8     | 0.010263 |
| 3    | p53 path | 4     | 0.042298 |

**Table S6**

| G0ID | Pathway   | Count | PValue   |
|------|-----------|-------|----------|
| 1    | Adherens  | 9     | 9.29E-05 |
| 2    | Metabolic | 41    | 0.000138 |
| 3    | Pyruvate  | 6     | 0.000948 |
| 4    | Carbon me | 9     | 0.001436 |
| 5    | Glycolysi | 7     | 0.001736 |
| 6    | Glutathic | 6     | 0.002923 |
| 7    | Glucagon  | 8     | 0.003265 |
| 8    | Longevity | 6     | 0.006937 |
| 9    | Leukocyte | 8     | 0.007047 |
| 10   | Synthesis | 3     | 0.008589 |
| 11   | Endocytos | 12    | 0.009503 |
| 12   | Ovarian s | 5     | 0.012946 |
| 13   | Epstein-F | 10    | 0.014369 |
| 14   | Bacterial | 6     | 0.014947 |
| 15   | Influenza | 9     | 0.01733  |
| 16   | Salivary  | 6     | 0.024212 |
| 17   | Huntingtc | 9     | 0.027937 |
| 18   | Fc gamma  | 6     | 0.028852 |
| 19   | Longevity | 6     | 0.030039 |
| 20   | Protein p | 8     | 0.035188 |

## Table S7

| OS gene       | All DEGs  | Venn gene |
|---------------|-----------|-----------|
| DPCD          | PTPN6     | GSTA1     |
| AC018816.3    | GSTO1     | LAPTM5    |
| RP11-757O6.1  | TNFRSF1B  | PRM1      |
| RP11-30P6.6   | LYZ       | SYNGR4    |
| PTCHD1        | GIMAP4    | FNDC8     |
| FADS2         | DSP       | VAMP2     |
| RP1-142L7.9   | CXCR4     | FSCN3     |
| APOC3         | EFEMP1    | MAMLD1    |
| SPDEF         | COL4A1    | GLB1L     |
| RP11-857B24.1 | CRIP1     |           |
| IL5           | LAPTM5    |           |
| CUTC          | MMP9      |           |
| AWAT2         | BASP1     |           |
| GRIK5         | NFE2L3    |           |
| SAMD14        | CORO1A    |           |
| INSRR         | CCL19     |           |
| CAV3          | HLA-DRB1  |           |
| APOA4         | TYROBP    |           |
| RP5-963E22.4  | C1QA      |           |
| LINC01484     | ISG15     |           |
| RPL23AP25     | CD9       |           |
| RP11-242C19.2 | KRT8      |           |
| ECHS1         | CDH1      |           |
| IGHV3-66      | C1QB      |           |
| SLIT1         | CD74      |           |
| CFC1          | TGFBI     |           |
| MBD3L1        | ARHGDIB   |           |
| UPF3AP1       | LUM       |           |
| TEX35         | HLA-DRA   |           |
| SSSCA1        | FZD5      |           |
| AMHR2         | CD24      |           |
| RP11-434E6.4  | CCL2      |           |
| C5orf66-AS1   | GBP1      |           |
| RP11-210M15.2 | RAB25     |           |
| TTC41P        | MMP12     |           |
| PDE9A         | ADAMDEC1  |           |
| OMA1          | SPP1      |           |
| NGFRAP1       | LIN28A    |           |
| ISYNA1        | KRT19     |           |
| CATSPER4      | SPACA1    |           |
| ZNF705G       | LINC00588 |           |
| METTL12       | RNFT1     |           |
| RP11-619A14.3 | RIBC2     |           |
| RP11-799D4.1  | KPNA5     |           |

|                |           |
|----------------|-----------|
| CISD3          | ZNF280B   |
| DNPB1          | DNAI2     |
| IHH            | NACA2     |
| RP11-555K12.1  | MORC1     |
| RP11-177F15.1  | GPR137    |
| RP11-334L9.1   | ADAM18    |
| SNAP47-AS1     | ADGB      |
| RP3-337H4.6    | ADCY10    |
| RP11-89H19.1   | CCDC70    |
| RP6-65G23.5    | SPO11     |
| BEX1           | RNF32     |
| CTC-820M8.1    | C11orf63  |
| C1QTNF9        | ADAM2     |
| AC007326.10    | PAPOLB    |
| CTB-1144G6.6   | LINC00837 |
| LRRC75A-AS1    | BTG4      |
| CCDC162P       | DPY19L1P1 |
| MS4A12         | LDHAL6B   |
| CRX            | SCIN      |
| RP11-588H23.3  | GLB1L     |
| HSD17B2        | CEP112    |
| RP11-368M16.3  | ATXN3L    |
| IGKV1-17       | RPGRIPI   |
| FENDRR         | SYNGR4    |
| ZNF114         | SPATA1    |
| DNAAF2         | SOX30     |
| CYP2A13        | TEX12     |
| ADAMTS7P4      | CCDC88A   |
| TMEM257        | CYLC1     |
| RNF208         | UBQLN3    |
| RP5-1057I20.5  | GRK4      |
| SFRP5          | CCDC186   |
| RP11-88H12.2   | CYLC2     |
| IQCC           | ERO1LB    |
| RP11-51F16.1   | GAPDHS    |
| FAM90A20P      | AURKC     |
| DMRTC1         | GPC5      |
| RP11-1057B6.1  | CARF      |
| AC006273.5     | LINC00342 |
| ERVWE2         | SPATA31C2 |
| C11orf86       | C20orf195 |
| DDRKG1         | C6orf10   |
| SIGLEC12       | IQCK      |
| RP11-752G15.10 | CAMK4     |
| CTD-2616J11.11 | ART3      |
| BAAT           | RFPL3S    |

|                |           |
|----------------|-----------|
| MDP1           | AKAP4     |
| ARPC3P1        | CCHCR1    |
| RP11-193H5.2   | IRGC      |
| AC007879.2     | TSSK2     |
| LCN15          | GK2       |
| SLC25A22       | NME8      |
| RP11-757G1.6   | CBLN1     |
| RP11-138I1.4   | CCIN      |
| KCNJ13         | USP2      |
| ADCK5          | PPP1R2P9  |
| RP11-445F12.1  | ADD3-AS1  |
| FAM229B        | PRKAA1    |
| MGAT4A         | ALLC      |
| AVPR1B         | C16orf95  |
| ZNF780A        | TEX28     |
| CDK5R2         | MYT1L     |
| GPX8           | COIL      |
| TMLHE-AS1      | CT62      |
| SFTPD-AS1      | RFX2      |
| CDH7           | MROH7     |
| RP11-299H22.3  | PRPS1L1   |
| TRPC4          | TNP2      |
| RP11-264I13.2  | C9orf9    |
| RP11-543B16.2  | PSORS1C1  |
| CENPB          | GPR135    |
| RP11-295D4.4   | HSPA1L    |
| SMAD6          | TTL7      |
| BIRC5          | PMFBP1    |
| AP000783.1     | ZBTB32    |
| DMP1           | LRRC36    |
| AMIGO3         | FBXO24    |
| CGREF1         | POM121L9P |
| CH507-216K13.1 | AQP5      |
| RP1-241P17.4   | ZC2HC1C   |
| AC005618.9     | KDM4D     |
| SH3PXD2A-AS1   | ZNRF4     |
| MTHFS          | ACRV1     |
| RP11-367N14.2  | ZSCAN5A   |
| BMPER          | CTAGE1    |
| RP13-270P17.3  | NOL4      |
| PHPT1          | LRRC48    |
| PNMA6A         | TSGA10    |
| RP11-274B21.3  | RDH8      |
| RP11-383B4.4   | CATSPERG  |
| AC023347.1     | APH1B     |
| MLIP           | GRAMD1C   |



|                 |          |
|-----------------|----------|
| RP11-725P16.2   | SLCO3A1  |
| PTRF            | SNX19    |
| SMTNL2          | MNS1     |
| NPM3            | SYCP2    |
| ZNF7            | VPRBP    |
| RP11-55K22.2    | LRIT1    |
| RP11-458F8.4    | HIRIP3   |
| AQP10           | PACRG    |
| PNOC            | ZCCHC14  |
| PORCN           | IZUMO4   |
| FCRL5           | TEX15    |
| RP5-1028K7.3    | TULP2    |
| TIMM8AP1        | C16orf71 |
| DLX3            | EFCAB6   |
| ATP2C2          | HCFC2    |
| HNF1A           | PGK2     |
| KIF20B          | ADAM5    |
| SLN             | WDR78    |
| RPS20P4         | PRKACG   |
| IGKV1OR2-108    | TDRD1    |
| RP11-295M18.6   | PDHA2    |
| FKSG54          | CLPB     |
| RN7SL208P       | ANKMY1   |
| DNAJC17         | DDX25    |
| F2RL3           | ADAM30   |
| C1orf105        | ACTL7B   |
| AP000349.2      | TAF7L    |
| RP4-570O12.3    | SSX3     |
| CELF6           | CETN1    |
| NPLOC4          | RAB27B   |
| IGSF8           | ZCWPW1   |
| C1orf116        | LRP2BP   |
| RP3-467L1.6     | SLC25A31 |
| SCARNA6         | LECT2    |
| RP11-864I4.4    | ARHGAP35 |
| CTB-151G24.2    | TCP11    |
| BX255923.2      | AHI1     |
| C20orf144       | ACR      |
| HPCAL4          | OXCT2    |
| RPS6KB2         | CAPN11   |
| GCSAML-AS1      | TRAPPC12 |
| RP1-80N2.2      | CST8     |
| ABC14-1080714F1 | CCDC7    |
| GOLGA2P9        | MCF2     |
| XXbac-BPG308K3  | CLIP4    |
| AC012066.1      | DOC2A    |

|               |          |
|---------------|----------|
| SND1          | HHIPL2   |
| SDHAF1        | ST7L     |
| ASGR1         | CCDC15   |
| IGLV4-60      | GDF9     |
| ASS1P2        | SLC1A6   |
| RP11-482G13.1 | NAT6     |
| RP11-552F3.4  | PIWIL1   |
| RP11-481J2.2  | CDADC1   |
| PSMB5         | LYZL6    |
| IRX3          | SSX1     |
| FRY-AS1       | SOCS7    |
| CTC-558O2.1   | SPATA6   |
| RP11-324H9.1  | HSPA4L   |
| RP11-496H1.2  | HOOK1    |
| ST6GALNAC1    | ZNF821   |
| AC010900.2    | SPATA7   |
| ARL3          | FNDC8    |
| ADAD1         | DKKL1    |
| RPS9          | ACE      |
| RP11-776H12.1 | MS4A5    |
| ZC3HAV1L      | TSKS     |
| RN7SL263P     | SYCP1    |
| CRHR1-IT1     | YPEL1    |
| CD151         | MMP28    |
| RP11-442G21.2 | ROPN1B   |
| LINC00475     | CHD5     |
| ATP6V1B1-AS1  | TEX40    |
| RPL39L        | LDHC     |
| AKAP4         | TTC12    |
| TERF1P2       | DNAH17   |
| RP11-341D18.2 | CTNNA3   |
| RP11-338N10.3 | ZBBX     |
| MRPS14        | TRIM66   |
| H2AFX         | SHCBP1L  |
| CXorf49       | CRISP2   |
| SMN2          | FSCN3    |
| CCDC86        | UTRN     |
| RP11-102K13.5 | PIGV     |
| KCNJ4         | C1orf105 |
| ATRIP         | PRSS21   |
| EP300-AS1     | SPTBN2   |
| GINM1         | SLC25A28 |
| TRIP6         | ACSBG2   |
| RP5-1096J16.1 | ZMYND10  |
| CRACR2B       | ACTL7A   |
| IGLV7-46      | IL13     |

|               |           |
|---------------|-----------|
| CNIH1         | IFT88     |
| FLJ33360      | RAB11FIP5 |
| PCDHB5        | TCP10     |
| PXT1          | HSF2BP    |
| ATP10A        | AGBL2     |
| SNHG8         | ZNF473    |
| UTS2B         | MAPRE3    |
| RP11-172E9.2  | DYRK3     |
| EEF1E1P1      | MAK       |
| SLC25A47      | FER       |
| DIO2          | CREM      |
| GLTSCR2-AS1   | ELL3      |
| RP11-420N3.3  | SFMBT1    |
| AKR1D1        | ZPBP      |
| PITX2         | USP32     |
| SLC2A7        | SMG7-AS1  |
| THTPA         | BBIP1     |
| RP11-71G12.1  | RBMXL2    |
| CHD4          | ODF1      |
| CENPCP1       | SOX5      |
| SLC25A23      | CHGA      |
| BCL2L14       | HYPM      |
| HMSD          | DRICH1    |
| C14orf80      | ANKS1B    |
| ATP11B        | ABCB9     |
| MT-ND5        | MAPKBP1   |
| ENTHD1        | CHKA      |
| MISP          | CCT6B     |
| RP11-193H5.1  | TEX30     |
| FAM149A       | PCSK2     |
| RP11-439M11.1 | ALDH1A2   |
| AFP           | ANKRD7    |
| ANKRD20A5P    | CLTCL1    |
| TUBB8P1       | SMPD2     |
| HRAS          | CCNO      |
| ZNF579        | INTS6     |
| CYP2C18       | SPANXB1   |
| BTBD16        | TEX14     |
| CEP250        | MAGEC1    |
| OAT           | BAP1      |
| AC093642.3    | FGFR1OP   |
| TCEB2         | CDKL3     |
| DCTN3         | SAMD4A    |
| RP11-486B10.4 | CASC1     |
| MUC5B         | NR3C2     |
| RBM4          | CCNA1     |

|                |              |
|----------------|--------------|
| RP11-398H6.1   | PHF1         |
| WFDC6          | PRM2         |
| RP11-799B12.1  | TTBK2        |
| MRPL43         | ARHGAP28     |
| CNTN6          | MTL5         |
| SCRN2          | TSSK1B       |
| FBXL15         | HRASLS       |
| RP11-270C12.3  | PRM1         |
| BEX5           | SLC6A16      |
| TLX1           | ODF2         |
| C11orf16       | STAG3        |
| AGPAT2         | SPA17        |
| HTR4           | C2orf42      |
| ANP32AP1       | FKBP6        |
| TUBAP2         | GSG1         |
| ZWINT          | SAYSD1       |
| CTC-499B15.4   | FRMPD1       |
| RP11-430H10.2  | GSTA3        |
| RP11-732A19.5  | SLC2A5       |
| ADAMTS4        | TEX13A       |
| RPL27A         | SMCP         |
| MAFG-AS1       | C10orf88     |
| U3             | LY6G5C       |
| EXOC3L2        | TTC30A       |
| AP000265.1     | NUP62CL      |
| RP11-299L17.3  | C1QTNF9B-AS1 |
| CTD-2595P9.4   | PHF7         |
| FOXA2          | RPL10L       |
| TRBV12-5       | LRP8         |
| RP11-579D7.4   | ZNHIT2       |
| LALBA          | NDUFAF3      |
| RP11-473M20.9  | PCYT2        |
| AFTPH          | SPAG1        |
| FOXA1          | SPEF1        |
| PCGF6          | CRAT         |
| RP4-610C12.3   | INHA         |
| EIF2S2P3       | CUL3         |
| SPA17          | RNF17        |
| RP11-77H9.6    | DUSP13       |
| EIF3FP3        | CLGN         |
| RP11-2H3.7     | OAZ3         |
| CTD-2288F12.1  | TNP1         |
| UNC80          | LIN7A        |
| ACTL6B         | YBX2         |
| RP11-1280N14.3 | DDX4         |
| PGR            | ULK2         |

|                |          |
|----------------|----------|
| RCN3           | ZNF165   |
| CALY           | DNAI1    |
| DTNA           | HMGN5    |
| IGKV3-7        | CEP350   |
| RP11-29H23.7   | VCX2     |
| VPS13A         | BAG1     |
| POLA2          | IGLL1    |
| ITIH2          | TSNAXIP1 |
| USP30          | IQCE     |
| PPP1R1A        | DXO      |
| ARHGAP19-SLIT1 | ADAM3A   |
| RP11-326C3.13  | DNAH7    |
| GRIN2C         | SPAG6    |
| LINC01485      | USP29    |
| CDH15          | CDKL2    |
| PCAT18         | VRK3     |
| HDGFRP2        | SH3TC2   |
| RHOD           | DFNB31   |
| CTC-459F4.1    | RALGPS1  |
| GUSBP6         | PHKG2    |
| FMO2           | NRIP3    |
| PSMA7          | CYB5R2   |
| CASC8          | BRDT     |
| KITLG          | TOLLIP   |
| NUTM2E         | IFT140   |
| CCDC144A       | RSPH6A   |
| GOT1           | TBL2     |
| RN7SKP30       | KIAA0895 |
| SNORA76C       | H2AFJ    |
| C1orf198       | VAMP2    |
| PPIAP31        | GID4     |
| NPC1L1         | ADORA1   |
| WDR18          | B9D1     |
| FOXC2          | CCDC181  |
| MRPL14         | SPINK2   |
| AF131215.9     | TLE4     |
| RPL29P19       | CNNM1    |
| RP11-697K23.3  | C9orf116 |
| PKD1L2         | CNTRL    |
| IGKV1-9        | CTNNA2   |
| GATA6          | SLC30A4  |
| PASK           | SRPK2    |
| AP000936.1     | CDK20    |
| SH3BP5-AS1     | FAAH     |
| NAPRT          | PIP5K1C  |
| RNA5-8S5       | TP53TG5  |

|                 |          |
|-----------------|----------|
| RNA5-8S5        | BRAP     |
| RNA5-8S5        | CCNH     |
| RNA5-8S5        | NME5     |
| TLR8-AS1        | ATF7IP2  |
| ACAD11          | CABYR    |
| HNRNPA1P6       | RUFY3    |
| RP11-158H5.2    | ZDHHC14  |
| CREBRF          | DPEP3    |
| RP1-43E13.2     | ZNF415   |
| PUS3            | SLC30A3  |
| RP11-438L7.1    | NR0B1    |
| IL12B           | FAM53C   |
| ACTN4P2         | PLSCR2   |
| MEIS3           | CSNK2A2  |
| WDR82P1         | KLHL11   |
| AF127936.3      | DZIP1    |
| RP11-404F10.2   | PIK3R3   |
| EPPIN-WFDC6     | SIK3     |
| SPOCK3          | PAOX     |
| RP11-214O1.3    | KCTD13   |
| TUBA8           | HAGH     |
| RP11-396C23.2   | TTLL1    |
| OSBP2           | PGAM2    |
| IL9RP3          | GRAMD1B  |
| IQCF5           | FHL5     |
| PNLIPRP2        | LRRC49   |
| PTGER1          | FUZ      |
| OCIAD2          | SHARPIN  |
| LL0XNC01-240C2. | PROX1    |
| RP11-492M23.2   | CCT8L2   |
| TNNC1           | DYNC2H1  |
| COMT            | DNALI1   |
| AMH             | ASB9     |
| HOXA9           | TRIM13   |
| AC111200.7      | EIF4G3   |
| OR7E10P         | NUP98    |
| AC006042.6      | OXR1     |
| NDUFB8          | CDK19    |
| C11orf91        | FAM216A  |
| ERVMER61-1      | OR7E156P |
| E4F1            | SKAP2    |
| RP5-907C10.3    | PGR      |
| HMGCS2          | CCDC176  |
| AP000593.7      | CTSF     |
| CTB-151G24.1    | ARL4A    |
| RP11-452K12.3   | SPRR2C   |

|               |         |
|---------------|---------|
| AP001631.9    | PIWIL2  |
| PFN3          | WDR60   |
| SUV39H2       | PDXK    |
| PF4           | DOCK3   |
| ADI1          | ABCA5   |
| CCIN          | TFDP3   |
| RP11-44N11.1  | GDF10   |
| AC000036.4    | PPEF1   |
| RP11-331F9.3  | STAG3L3 |
| RP11-554L12.1 | NPIPB15 |
| UPK1B         | ETNK2   |
| PAMR1         | MARK4   |
| MUCL1         | AGBL5   |
| RP11-161I6.2  | SLC2A8  |
| SMIM24        | ELOVL2  |
| TRIP10        | TBPL1   |
| RPL35P1       | SSX2IP  |
| PNMT          | TEKT2   |
| DUS1L         | SKAP1   |
| SLC9A5        | TMBIM4  |
| MT-ND4L       | OPLAH   |
| RP11-84A14.4  | TCFL5   |
| RP11-28G8.1   | CTAG2   |
| CECR6         | ATP8A2  |
| IGSF5         | PRPH    |
| RAB3IP        | CCSER2  |
| RP11-30J20.1  | PAK6    |
| ASF1A         | SLC35G2 |
| NCAPH         | CHODL   |
| JMJD7-PLA2G4B | AKAP3   |
| KB-1507C5.4   | KHDRBS3 |
| LURAP1L       | MYLK3   |
| SPDYE16       | HGFAC   |
| OR7E91P       | POLI    |
| RP11-718O11.1 | CRYBG3  |
| IL17RB        | TPGS2   |
| SNX29         | MRGBP   |
| CHGA          | FAM46C  |
| SLCO1B1       | SNAP91  |
| CLDN9         | MBNL3   |
| ZNF44         | INPP4B  |
| SZT2          | APPBP2  |
| RFC2          | IPO5    |
| PACSIN3       | GRB14   |
| RP11-196G11.1 | TPTE    |
| SLC17A4       | SPAG4   |

|               |           |
|---------------|-----------|
| IKBKGP1       | ELP5      |
| GPR37         | TPP2      |
| GPHN          | IQCG      |
| CTC-459F4.9   | RNF141    |
| CBR1          | MAP7      |
| RP11-493L12.6 | INPP1     |
| GFRA2         | GPX4      |
| CTD-2161F6.2  | TESC      |
| SNORA59B      | DPY19L2P2 |
| HIST1H4A      | PVRL3     |
| RP11-299H22.6 | POMT1     |
| RP11-108L7.15 | STAT4     |
| ANOS2P        | WT1       |
| CRYBA2        | TOMM34    |
| WSCD2         | KCNH2     |
| TMEM259       | CCDC53    |
| ACTBP8        | FBXL2     |
| ALG9          | ACE2      |
| VSIG1         | CLEC16A   |
| FNDC7         | GUCA1A    |
| NTN4          | CCNJL     |
| TMEM72        | CETN3     |
| ROCK1         | IFT81     |
| SV2A          | PDE1A     |
| CTC-260F20.3  | SCRG1     |
| LINC00632     | ENOX1     |
| IGLV3-27      | PDZD2     |
| ANPEP         | CALB2     |
| C17orf99      | WASF1     |
| RCAN1         | MLF1      |
| OR7E157P      | KLHDC10   |
| PCDHA3        | LPIN1     |
| PON3          | GLUD2     |
| MSX1          | TEX11     |
| CYP4F35P      | CUL9      |
| TCEAL8        | MAPK13    |
| ARHGAP6       | SCCPDH    |
| IP6K3         | MAMLD1    |
| ITGAD         | SLC12A2   |
| RP11-350G8.3  | PRND      |
| HLA-DQA1      | SCML1     |
| RBM14         | FOXG1     |
|               | CDKN3     |
|               | EFHC1     |
|               | TCEAL2    |
|               | PAQR3     |



CITED1  
NAALAD2  
ST6GALNAC2  
FOXD1  
SPHK2  
LRRC16A  
HSPA2  
PMS1  
GOLGA8N  
MAGEA1  
WDR62  
CYB5R4  
BCL2L14  
CYP26B1  
USP25  
LRRC6  
CCDC92  
ME3  
TTYH1  
SLC6A1  
NDRG4  
AZGP1  
PENK  
TCEA2  
IFT57  
CLK4  
GPR18  
BAZ2B  
INHBB  
RNF139  
MAGEA11  
BAZ1A  
GSTM3  
CAND2  
MPC2  
GLRX2  
MYOM2  
SPAG16  
GULP1  
DMRT1  
ZCCHC2  
KLK11  
ISYNA1  
DAZL  
RPL39L  
CYP17A1

SAR1B  
PPARGC1A  
ZNF516  
EPB41L3  
SEC61A2  
TMX4  
NXF3  
ACAT1  
SPATA20  
MICAL2  
HSD17B3  
DAAM2  
SH3GL2  
KLK5  
IL13RA2  
P4HTM  
STX8  
OPTN  
DACH1  
LZTFL1  
LRRN3  
TKTL1  
PRKCZ  
C16orf45  
REEP1  
GATM  
SERPINA5  
SLC27A6  
PPFIBP2  
GSTA1  
BBX  
CENPU  
ARNT2  
ELAVL4  
PRKCDBP  
JAM2  
OSR2  
MAGEA4  
KRT23  
ZBTB38  
ASAP2  
TUBA4A  
ALDH1A1  
CEP70  
TNFAIP6  
PTGDS

INSL3  
CNN1  
NEFM  
CPE  
SMARCA1  
PLK2  
CLU  
PLA2G16  
TIPARP  
TSPYL5  
SOX9  
KIF5C  
MAGEA12  
HOPX  
ZBTB20  
HMGCS2  
CKM  
STAR  
ABCA8  
FHL1  
SPOCK1  
LIPG  
MAGEA6  
CADM1  
MOK  
PFKP  
CYP11A1  
CST3  
DDAH1  
SERPINF1  
APOA1  
BEX1

## Table S8

| OS gene       | Top 40 gene ranked by degree | Venn gene |
|---------------|------------------------------|-----------|
| DPCD          | TYROBP                       | LAPTM5    |
| AC018816.3    | HLA-DRA                      |           |
| RP11-757O6.1  | C1QA                         |           |
| RP11-30P6.6   | C1QB                         |           |
| PTCHD1        | CD74                         |           |
| FADS2         | MMP9                         |           |
| RP1-142L7.9   | PRM2                         |           |
| APOC3         | CCL2                         |           |
| SPDEF         | CXCR4                        |           |
| RP11-857B24.1 | SYCP1                        |           |
| IL5           | TNP2                         |           |
| CUTC          | SPP1                         |           |
| AWAT2         | SPO11                        |           |
| GRIK5         | IL13                         |           |
| SAMD14        | HLA-DRB1                     |           |
| INSRR         | FKBP6                        |           |
| CAV3          | LAPTM5                       |           |
| APOA4         | SYCP2                        |           |
| RP5-963E22.4  | TEX12                        |           |
| LINC01484     | STAG3                        |           |
| RPL23AP25     | MMP12                        |           |
| RP11-242C19.2 | AKAP4                        |           |
| ECHS1         | LDHC                         |           |
| IGHV3-66      | PGK2                         |           |
| SLIT1         | CDH1                         |           |
| CFC1          | ACR                          |           |
| MBD3L1        | PRM1                         |           |
| UPF3AP1       | ODF1                         |           |
| TEX35         | CRISP2                       |           |
| SSSCA1        | GAPDHS                       |           |
| AMHR2         | PAPOLB                       |           |
| RP11-434E6.4  | CREM                         |           |
| C5orf66-AS1   | KRT19                        |           |
| RP11-210M15.2 | CAMK4                        |           |
| TTC41P        | DKKL1                        |           |
| PDE9A         | SPA17                        |           |
| OMA1          | CCL19                        |           |
| NGFRAP1       | PIWIL1                       |           |
| ISYNA1        | SPACA1                       |           |
| CATSPER4      | DDX25                        |           |
| ZNF705G       |                              |           |
| METTL12       |                              |           |
| RP11-619A14.3 |                              |           |
| RP11-799D4.1  |                              |           |

CISD3  
DNPH1  
IHH  
RP11-555K12.1  
RP11-177F15.1  
RP11-334L9.1  
SNAP47-AS1  
RP3-337H4.6  
RP11-89H19.1  
RP6-65G23.5  
BEX1  
CTC-820M8.1  
C1QTNF9  
AC007326.10  
CTB-1144G6.6  
LRRC75A-AS1  
CCDC162P  
MS4A12  
CRX  
RP11-588H23.3  
HSD17B2  
RP11-368M16.3  
IGKV1-17  
FENDRR  
ZNF114  
DNAAF2  
CYP2A13  
ADAMTS7P4  
TMEM257  
RNF208  
RP5-1057I20.5  
SFRP5  
RP11-88H12.2  
IQCC  
RP11-51F16.1  
FAM90A20P  
DMRTC1  
RP11-1057B6.1  
AC006273.5  
ERVWE2  
C11orf86  
DDRKG1  
SIGLEC12  
RP11-752G15.10  
CTD-2616J11.11  
BAAT

MDP1  
ARPC3P1  
RP11-193H5.2  
AC007879.2  
LCN15  
SLC25A22  
RP11-757G1.6  
RP11-138I1.4  
KCNJ13  
ADCK5  
RP11-445F12.1  
FAM229B  
MGAT4A  
AVPR1B  
ZNF780A  
CDK5R2  
GPX8  
TMLHE-AS1  
SFTPD-AS1  
CDH7  
RP11-299H22.3  
TRPC4  
RP11-264I13.2  
RP11-543B16.2  
CENPB  
RP11-295D4.4  
SMAD6  
BIRC5  
AP000783.1  
DMP1  
AMIGO3  
CGREF1  
CH507-216K13.1  
RP1-241P17.4  
AC005618.9  
SH3PXD2A-AS1  
MTHFS  
RP11-367N14.2  
BMPER  
RP13-270P17.3  
PHPT1  
PNMA6A  
RP11-274B21.3  
RP11-383B4.4  
AC023347.1  
MLIP

RP11-725P16.2  
PTRF  
SMTNL2  
NPM3  
ZNF7  
RP11-55K22.2  
RP11-458F8.4  
AQP10  
PNOC  
PORCN  
FCRL5  
RP5-1028K7.3  
TIMM8AP1  
DLX3  
ATP2C2  
HNF1A  
KIF20B  
SLN  
RPS20P4  
IGKV1OR2-108  
RP11-295M18.6  
FKSG54  
RN7SL208P  
DNAJC17  
F2RL3  
C1orf105  
AP000349.2  
RP4-570O12.3  
CELF6  
NPLOC4  
IGSF8  
C1orf116  
RP3-467L1.6  
SCARNA6  
RP11-864I4.4  
CTB-151G24.2  
BX255923.2  
C20orf144  
HPCAL4  
RPS6KB2  
GCSAML-AS1  
RP1-80N2.2  
ABC14-1080714F14.1  
GOLGA2P9  
XXbac-BPG308K3.5  
AC012066.1

SND1  
SDHAF1  
ASGR1  
IGLV4-60  
ASS1P2  
RP11-482G13.1  
RP11-552F3.4  
RP11-481J2.2  
PSMB5  
IRX3  
FRY-AS1  
CTC-558O2.1  
RP11-324H9.1  
RP11-496H1.2  
ST6GALNAC1  
AC010900.2  
ARL3  
ADAD1  
RPS9  
RP11-776H12.1  
ZC3HAV1L  
RN7SL263P  
CRHR1-IT1  
CD151  
RP11-442G21.2  
LINC00475  
ATP6V1B1-AS1  
RPL39L  
AKAP4  
TERF1P2  
RP11-341D18.2  
RP11-338N10.3  
MRPS14  
H2AFX  
CXorf49  
SMN2  
CCDC86  
RP11-102K13.5  
KCNJ4  
ATRIP  
EP300-AS1  
GINM1  
TRIP6  
RP5-1096J16.1  
CRACR2B  
IGLV7-46



CNIH1  
FLJ33360  
PCDHB5  
PXT1  
ATP10A  
SNHG8  
UTS2B  
RP11-172E9.2  
EEF1E1P1  
SLC25A47  
DIO2  
GLTSCR2-AS1  
RP11-420N3.3  
AKR1D1  
PITX2  
SLC2A7  
THTPA  
RP11-71G12.1  
CHD4  
CENPCP1  
SLC25A23  
BCL2L14  
HMSD  
C14orf80  
ATP11B  
MT-ND5  
ENTHD1  
MISP  
RP11-193H5.1  
FAM149A  
RP11-439M11.1  
AFP  
ANKRD20A5P  
TUBB8P1  
HRAS  
ZNF579  
CYP2C18  
BTBD16  
CEP250  
OAT  
AC093642.3  
TCEB2  
DCTN3  
RP11-486B10.4  
MUC5B  
RBM4

RP11-398H6.1  
WFDC6  
RP11-799B12.1  
MRPL43  
CNTN6  
SCRN2  
FBXL15  
RP11-270C12.3  
BEX5  
TLX1  
C11orf16  
AGPAT2  
HTR4  
ANP32AP1  
TUBAP2  
ZWINT  
CTC-499B15.4  
RP11-430H10.2  
RP11-732A19.5  
ADAMTS4  
RPL27A  
MAFG-AS1  
U3  
EXOC3L2  
AP000265.1  
RP11-299L17.3  
CTD-2595P9.4  
FOXA2  
TRBV12-5  
RP11-579D7.4  
LALBA  
RP11-473M20.9  
AFTPH  
FOXA1  
PCGF6  
RP4-610C12.3  
EIF2S2P3  
SPA17  
RP11-77H9.6  
EIF3FP3  
RP11-2H3.7  
CTD-2288F12.1  
UNC80  
ACTL6B  
RP11-1280N14.3  
PGR

RCN3  
CALY  
DTNA  
IGKV3-7  
RP11-29H23.7  
VPS13A  
POLA2  
ITIH2  
USP30  
PPP1R1A  
ARHGAP19-SLIT1  
RP11-326C3.13  
GRIN2C  
LINC01485  
CDH15  
PCAT18  
HDGFRP2  
RHOD  
CTC-459F4.1  
GUSBP6  
FMO2  
PSMA7  
CASC8  
KITLG  
NUTM2E  
CCDC144A  
GOT1  
RN7SKP30  
SNORA76C  
C1orf198  
PPIAP31  
NPC1L1  
WDR18  
FOXC2  
MRPL14  
AF131215.9  
RPL29P19  
RP11-697K23.3  
PKD1L2  
IGKV1-9  
GATA6  
PASK  
AP000936.1  
SH3BP5-AS1  
NAPRT  
RNA5-8S5

RNA5-8S5  
RNA5-8S5  
RNA5-8S5  
TLR8-AS1  
ACAD11  
HNRNPA1P6  
RP11-158H5.2  
CREBRF  
RP1-43E13.2  
PUS3  
RP11-438L7.1  
IL12B  
ACTN4P2  
MEIS3  
WDR82P1  
AF127936.3  
RP11-404F10.2  
EPPIN-WFDC6  
SPOCK3  
RP11-214O1.3  
TUBA8  
RP11-396C23.2  
OSBP2  
IL9RP3  
IQCF5  
PNLIPRP2  
PTGER1  
OCIAD2  
LL0XNC01-240C2.1  
RP11-492M23.2  
TNNC1  
COMT  
AMH  
HOXA9  
AC111200.7  
OR7E10P  
AC006042.6  
NDUFB8  
C11orf91  
ERVMER61-1  
E4F1  
RP5-907C10.3  
HMGCS2  
AP000593.7  
CTB-151G24.1  
RP11-452K12.3

AP001631.9  
PFN3  
SUV39H2  
PF4  
ADI1  
CCIN  
RP11-44N11.1  
AC000036.4  
RP11-331F9.3  
RP11-554L12.1  
UPK1B  
PAMR1  
MUCL1  
RP11-161I6.2  
SMIM24  
TRIP10  
RPL35P1  
PNMT  
DUS1L  
SLC9A5  
MT-ND4L  
RP11-84A14.4  
RP11-28G8.1  
CECR6  
IGSF5  
RAB3IP  
RP11-30J20.1  
ASF1A  
NCAPH  
JMJD7-PLA2G4B  
KB-1507C5.4  
LURAP1L  
SPDYE16  
OR7E91P  
RP11-718O11.1  
IL17RB  
SNX29  
CHGA  
SLCO1B1  
CLDN9  
ZNF44  
SZT2  
RFC2  
PACSIN3  
RP11-196G11.1  
SLC17A4

IKBKGP1  
GPR37  
GPHN  
CTC-459F4.9  
CBR1  
RP11-493L12.6  
GFRA2  
CTD-2161F6.2  
SNORA59B  
HIST1H4A  
RP11-299H22.6  
RP11-108L7.15  
ANOS2P  
CRYBA2  
WSCD2  
TMEM259  
ACTBP8  
ALG9  
VSIG1  
FNDC7  
NTN4  
TMEM72  
ROCK1  
SV2A  
CTC-260F20.3  
LINC00632  
IGLV3-27  
ANPEP  
C17orf99  
RCAN1  
OR7E157P  
PCDHA3  
PON3  
MSX1  
CYP4F35P  
TCEAL8  
ARHGAP6  
IP6K3  
ITGAD  
RP11-350G8.3  
HLA-DQA1  
RBM14
